# Supplementary material for: Downregulation of UDP-glucose 6-dehydrogenase predicts adverse prognosis in colorectal cancer and promotes tumorigenesis
Source: Research Square preprint supplement (doi:10.21203/rs.3.rs-6043435/v1), 2025-02-26
Supplement: Supplementary file 1 [file 11464f1cdd4b2e2bd5c5089a.xlsx]

## Sheet: Sheet1
ID	Description	GeneRatio	BgRatio	pvalue	p.adjust	qvalue	geneID	Count	ONT
GO:0070887	cellular response to chemical stimulus	283/415	3100/17910	9.84937620118533e-120	7.56924561061092e-116	2.88327528584173e-116	MMP2/XDH/EDN1/HSPB1/CXCR4/MPL/IGF1/EP300/NOS2/SOD2/FGFR1/MET/UGT1A1/LEP/BRCA1/CYP2D6/CYP2C19/COL1A1/BIRC5/APOE/PTK2/BCL2/GPD1/TF/GCK/ASS1/ALAD/TFR2/CYP1A1/IRF3/EZR/IL5/AGT/HSPA8/RARB/GSTP1/FN1/NFE2L2/NR1I3/HP/BMP6/PPARGC1A/CYP3A5/PDGFRB/TNF/IL1A/CREBBP/ITGB1/LDLR/ABCC2/KRT8/SHH/THPO/JAK2/TNFRSF1A/SPP1/SFTPD/XIAP/WNT5A/PTGS2/BMP7/B2M/AGER/CTNNB1/CYP2C9/CCND1/ESR1/PSMB8/VEGFA/TGFB1/MYC/MRC1/PCSK9/N…	283	BP
GO:0042221	response to chemical	321/415	4520/17910	1.67142991250137e-112	6.42246943878651e-109	2.44644557192963e-109	ABCA3/MMP2/XDH/EDN1/HSPB1/CXCR4/MPL/IGF1/EP300/NOS2/SOD2/FGFR1/MET/UGT1A1/LEP/BRCA1/CYP2D6/CYP2C19/ELANE/COL1A1/BIRC5/GNAS/APOE/HSPD1/PTK2/BCL2/GPD1/TF/GCK/GUCY2C/ASS1/ALAD/TFR2/CYP1A1/IRF3/ACTC1/EZR/IL5/AGT/HSPA8/RARB/GSTP1/FN1/NFE2L2/NR1I3/HP/ATP7B/BMP6/PPARGC1A/CYP3A5/PDGFRB/TNF/IL1A/CREBBP/ITGB1/LDLR/ABCC2/KRT8/SHH/THPO/JAK2/TNFRSF1A/SPP1/SFTPD/XIAP/WNT5A/PTGS2/BMP7/B2M/AGER/CTNNB1/CYP2C9/CCN…	321	BP
GO:0010033	response to organic substance	275/415	3138/17910	3.83114714021804e-110	9.81412192419189e-107	3.73839305156013e-107	ABCA3/MMP2/XDH/EDN1/HSPB1/CXCR4/MPL/IGF1/EP300/NOS2/SOD2/FGFR1/UGT1A1/LEP/BRCA1/ELANE/COL1A1/BIRC5/APOE/HSPD1/PTK2/BCL2/GPD1/GCK/ASS1/ALAD/CYP1A1/IRF3/ACTC1/EZR/IL5/AGT/HSPA8/RARB/GSTP1/FN1/NFE2L2/NR1I3/BMP6/PPARGC1A/PDGFRB/TNF/IL1A/CREBBP/ITGB1/LDLR/ABCC2/KRT8/THPO/JAK2/TNFRSF1A/SPP1/XIAP/WNT5A/PTGS2/BMP7/B2M/AGER/CTNNB1/CCND1/ESR1/TYMS/PSMB8/VEGFA/TGFB1/MYC/MRC1/PCSK9/NKX2-1/VCP/IL13/SLC11A1/TN…	275	BP
GO:0009605	response to external stimulus	237/415	2331/17910	2.24233252030551e-103	4.30808135463696e-100	1.64103335236043e-100	EDN1/HSPB1/CXCR4/IGF1/EP300/MMP7/NOS2/FGFR1/MET/UGT1A1/LEP/ELANE/COL1A1/FOXP3/APOE/C3/PTK2/BCL2/ASS1/ALAD/CYP1A1/IRF3/EZR/AGT/CRP/HSPA8/GSTP1/NFE2L2/HP/BMP6/PPARGC1A/PDGFRB/TNF/LDLR/ABCC2/KRT8/SHH/JAK2/TNFRSF1A/SPP1/SFTPD/F2/XIAP/WNT5A/PTGS2/BMP7/B2M/AGER/CBS/CCND1/ESR1/ACE2/TYMS/VEGFA/TGFB1/MRC1/PCSK9/NKX2-1/IL13/SLC11A1/TNFAIP3/FOXO1/STAT1/GCLC/MMP12/CCR7/CR1/PTPRC/CD14/HMGCR/GGT1/EIF2AK2/CCL11…	237	BP
GO:0071310	cellular response to organic substance	245/415	2564/17910	6.99935394331844e-102	1.07580070108804e-98	4.09793754028812e-99	MMP2/XDH/EDN1/HSPB1/CXCR4/MPL/IGF1/EP300/NOS2/SOD2/FGFR1/UGT1A1/LEP/BRCA1/COL1A1/BIRC5/PTK2/BCL2/GPD1/GCK/ASS1/ALAD/CYP1A1/IRF3/EZR/IL5/AGT/HSPA8/RARB/GSTP1/FN1/NFE2L2/NR1I3/BMP6/PPARGC1A/PDGFRB/TNF/IL1A/CREBBP/ITGB1/LDLR/ABCC2/KRT8/THPO/JAK2/TNFRSF1A/SPP1/XIAP/WNT5A/PTGS2/BMP7/B2M/AGER/CTNNB1/CCND1/ESR1/PSMB8/VEGFA/TGFB1/MYC/MRC1/PCSK9/NKX2-1/VCP/IL13/TNFAIP3/FOXO1/MMP1/STAT1/GCLC/IGFBP5/MMP12/C…	245	BP
GO:0006950	response to stress	280/415	3822/17910	5.47263523395359e-93	7.00953362882223e-90	2.67006992730262e-90	MMP2/XDH/EDN1/HSPB1/CXCR4/MPL/IGF1/EP300/NOS2/SOD2/MET/UGT1A1/LEP/BRCA1/ELANE/COL1A1/FOXP3/GNAS/APOE/C3/HSPD1/BCL2/ASS1/ALAD/EDNRA/TFR2/CYP1A1/IRF3/EZR/IL5/AGT/HPS4/CRP/HSPA8/GSTP1/FN1/NFE2L2/HP/BMP6/PPARGC1A/SNAI1/PDGFRB/TNF/IL1A/CREBBP/ITGB1/LDLR/ABCC2/KRT8/SHH/JAK2/TNFRSF1A/SPP1/SFTPD/F2/XIAP/WNT5A/PTGS2/BMP7/B2M/AGER/CBS/CTNNB1/CCND1/ESR1/ACE2/PSMB8/VEGFA/TGFB1/MYC/MRC1/PCSK9/VCP/IL13/SLC11A1…	280	BP
GO:1901700	response to oxygen-containing compound	190/415	1551/17910	2.41869547525737e-92	2.65538210390755e-89	1.01148753634447e-89	MMP2/EDN1/IGF1/NOS2/SOD2/MET/UGT1A1/LEP/BRCA1/ELANE/COL1A1/APOE/PTK2/BCL2/GPD1/GCK/ASS1/ALAD/CYP1A1/ACTC1/EZR/AGT/GSTP1/NFE2L2/HP/BMP6/PPARGC1A/PDGFRB/TNF/LDLR/ABCC2/KRT8/JAK2/SPP1/WNT5A/PTGS2/BMP7/AGER/CTNNB1/CCND1/ESR1/TYMS/TGFB1/MRC1/PCSK9/VCP/IL13/SLC11A1/TNFAIP3/FOXO1/STAT1/GCLC/IGFBP5/MMP12/CCR7/CD14/HMGCR/HMOX1/INS/SMAD2/BGLAP/MMP3/IL10/MAPK1/MDM2/EGFR/SOD1/CREB1/MAPK8/SRC/HBB/CXCL10/CCL5/…	190	BP
GO:0034097	response to cytokine	164/415	1167/17910	6.11388074328206e-87	5.87314668901533e-84	2.23719767724571e-84	MMP2/EDN1/CXCR4/MPL/NOS2/SOD2/LEP/BRCA1/COL1A1/BIRC5/BCL2/GPD1/ASS1/ALAD/IRF3/IL5/HSPA8/GSTP1/FN1/NFE2L2/PPARGC1A/TNF/IL1A/ITGB1/ABCC2/KRT8/THPO/JAK2/TNFRSF1A/WNT5A/PTGS2/B2M/CCND1/TYMS/PSMB8/VEGFA/TGFB1/MYC/MRC1/IL13/SLC11A1/TNFAIP3/FOXO1/MMP1/STAT1/GCLC/MMP12/CCR7/PTPRC/CD14/ANXA2/EIF2AK2/CCL11/HMOX1/MMP3/CXCR1/IL10/MAPK1/CXCL2/IKBKB/SOD1/CREB1/IL4/BBS4/MAPK8/GPR35/SRC/CXCL10/CCL5/TP53/CDKN1A/C…	164	BP
GO:0065008	regulation of biological quality	265/415	3661/17910	3.02372796862887e-84	2.58192771543477e-81	9.83507307690865e-82	XDH/EDN1/HSPB1/CXCR4/MPL/IGF1/EP300/NOS2/SOD2/SEMA4D/FGFR1/MET/UGT1A1/LEP/ELANE/COL1A1/FOXP3/GNAS/APOE/C3/HSPD1/PTK2/BCL2/TF/GCK/ASS1/EDNRA/TFR2/CYP1A1/EZR/AGT/PKHD1/HPS4/CRP/HSPA8/GSTP1/FN1/NFE2L2/GAA/ATP7B/BMP6/PPARGC1A/TNF/IL1A/CREBBP/LDLR/ABCC2/NOP10/SHH/JAK2/SPP1/SFTPD/F2/XIAP/WNT5A/PTGS2/B2M/AGER/CTNNB1/CCND1/ESR1/ACE2/SCNN1B/PSMB8/VEGFA/TGFB1/MYC/PCSK9/VCP/IL13/SLC11A1/TNFAIP3/FOXO1/STAT1/…	265	BP
GO:0033993	response to lipid	140/415	883/17910	8.09214003585526e-80	6.21880961755477e-77	2.36886751996984e-77	ABCA3/EDN1/EP300/NOS2/UGT1A1/LEP/BRCA1/ELANE/COL1A1/BCL2/ASS1/ALAD/CYP1A1/AGT/RARB/GSTP1/NR1I3/BMP6/PPARGC1A/PDGFRB/TNF/LDLR/ABCC2/JAK2/SPP1/WNT5A/PTGS2/BMP7/CTNNB1/CCND1/ESR1/TYMS/TGFB1/MRC1/IL13/SLC11A1/TNFAIP3/FOXO1/CCR7/CD14/SMAD2/BGLAP/IL10/MAPK1/MDM2/EGFR/CREB1/MAPK8/SRC/CXCL10/CCL5/CDKN1A/LPL/CAT/IDH1/CLDN1/NFKB1/SIRT1/IL1B/REN/AGXT/NFKBIA/CPT1A/HAMP/SREBF1/NOD2/TLR2/HAVCR2/NME1/AGTR2/EPO/…	140	BP
GO:0071345	cellular response to cytokine stimulus	152/415	1084/17910	1.42598835855094e-79	9.96247321405813e-77	3.79490299055517e-77	MMP2/EDN1/CXCR4/MPL/NOS2/SOD2/LEP/BRCA1/COL1A1/BIRC5/BCL2/GPD1/ASS1/ALAD/IRF3/IL5/HSPA8/GSTP1/FN1/NFE2L2/PPARGC1A/TNF/IL1A/ITGB1/ABCC2/KRT8/THPO/JAK2/TNFRSF1A/WNT5A/PTGS2/B2M/CCND1/PSMB8/VEGFA/TGFB1/MYC/MRC1/IL13/TNFAIP3/FOXO1/MMP1/STAT1/MMP12/CCR7/PTPRC/ANXA2/CCL11/HMOX1/MMP3/CXCR1/IL10/MAPK1/CXCL2/IKBKB/SOD1/CREB1/IL4/BBS4/MAPK8/GPR35/CXCL10/CCL5/TP53/CDKN1A/CLDN1/NFKB1/SIRT1/IL1B/NFKBIA/HAMP/N…	152	BP
GO:0051239	regulation of multicellular organismal process	241/415	3144/17910	1.25334063714357e-78	8.02660233037363e-76	3.0574915016634e-76	XDH/EDN1/HSPB1/CXCR4/MPL/IGF1/EP300/NOS2/SOD2/SEMA4D/FGFR1/MET/LEP/BRCA1/ELANE/COL1A1/DGUOK/FOXP3/GNAS/APOE/C3/HSPD1/PTK2/BCL2/IRF3/EZR/IL5/AGT/CRP/RARB/GSTP1/TCF4/FN1/NFE2L2/GAA/BMP6/PPARGC1A/SNAI1/PDGFRB/TNF/EGF/IL1A/CREBBP/ITGB1/LDLR/SHH/THPO/JAK2/TNFRSF1A/SPP1/SFTPD/F2/WNT5A/PTGS2/BMP7/B2M/AGER/CTNNB1/CCND1/NOTCH2/ESR1/ACE2/PSMB8/VEGFA/TGFB1/MYC/PCSK9/NKX2-1/IL13/SLC11A1/TNFAIP3/FOXO1/STAT1/I…	241	BP
GO:0051240	positive regulation of multicellular organismal process	184/415	1750/17910	2.01961523504466e-77	1.19390331394755e-74	4.54781373980502e-75	EDN1/HSPB1/CXCR4/MPL/IGF1/EP300/SOD2/SEMA4D/FGFR1/MET/LEP/BRCA1/ELANE/COL1A1/FOXP3/GNAS/APOE/C3/HSPD1/PTK2/BCL2/IRF3/EZR/IL5/AGT/RARB/TCF4/FN1/NFE2L2/BMP6/PPARGC1A/SNAI1/PDGFRB/TNF/EGF/IL1A/CREBBP/ITGB1/SHH/THPO/JAK2/F2/WNT5A/PTGS2/BMP7/B2M/AGER/CTNNB1/CCND1/ACE2/VEGFA/TGFB1/MYC/IL13/SLC11A1/TNFAIP3/STAT1/MMP12/CCR7/SLC22A5/PTPRC/CD14/HMGCR/ANXA2/FH/EIF2AK2/CCL11/HMOX1/INS/SMAD2/TUBB2B/MMP8/IL10/…	184	BP
GO:0009893	positive regulation of metabolic process	245/415	3313/17910	4.29589216374499e-77	2.35813794845573e-74	8.98261361456753e-75	XDH/EDN1/HSPB1/CXCR4/IGF1/EP300/SEMA4D/FGFR1/MET/LEP/BRCA1/ELANE/COL1A1/FOXP3/GNAS/APOE/AIRE/C3/HSPD1/PTK2/BCL2/GPD1/GCK/ASS1/TFR2/IRF3/ACTC1/EZR/IL5/AGT/CRP/HSPA8/GSTP1/TCF4/FN1/NFE2L2/NR1I3/BMP6/PPARGC1A/SNAI1/PDGFRB/TNF/EGF/IL1A/CREBBP/LDLR/SHH/THPO/JAK2/TNFRSF1A/SPP1/F2/XIAP/WNT5A/PTGS2/BMP7/AGER/CTNNB1/CCND1/NOTCH2/ESR1/ACE2/VEGFA/TGFB1/MYC/PCSK9/NKX2-1/VCP/IL13/SLC11A1/TNFAIP3/FOXO1/STAT1/G…	245	BP
GO:0031325	positive regulation of cellular metabolic process	234/415	3007/17910	8.09606711512513e-77	4.14788505198244e-74	1.580011413836e-74	XDH/EDN1/HSPB1/CXCR4/IGF1/EP300/SEMA4D/FGFR1/MET/LEP/BRCA1/ELANE/COL1A1/FOXP3/APOE/AIRE/C3/HSPD1/PTK2/BCL2/GPD1/GCK/ASS1/TFR2/IRF3/EZR/IL5/AGT/CRP/HSPA8/GSTP1/TCF4/FN1/NFE2L2/NR1I3/BMP6/PPARGC1A/SNAI1/PDGFRB/TNF/EGF/IL1A/CREBBP/LDLR/SHH/THPO/JAK2/TNFRSF1A/SPP1/F2/XIAP/WNT5A/PTGS2/BMP7/AGER/CTNNB1/CCND1/NOTCH2/ESR1/ACE2/VEGFA/TGFB1/MYC/PCSK9/NKX2-1/VCP/IL13/SLC11A1/TNFAIP3/FOXO1/STAT1/GCLC/MMP12/C…	234	BP
GO:0032879	regulation of localization	219/415	2688/17910	4.71251444164132e-74	2.26347959275085e-71	8.62204122513454e-72	EDN1/HSPB1/CXCR4/IGF1/NOS2/SOD2/SEMA4D/FGFR1/MET/LEP/ELANE/COL1A1/FOXP3/GNAS/APOE/AIRE/C3/PTK2/BCL2/TF/GCK/EDNRA/TFR2/IRF3/EZR/IL5/AGT/PKHD1/HPS4/CRP/HSPA8/GSTP1/FN1/NFE2L2/BMP6/PPARGC1A/SNAI1/PDGFRB/TNF/EGF/IL1A/ITGB1/NOP10/SHH/JAK2/TNFRSF1A/SPP1/SFTPD/F2/WNT5A/PTGS2/BMP7/B2M/AGER/CTNNB1/ACE2/VEGFA/TGFB1/PCSK9/NKX2-1/IL13/SLC11A1/TNFAIP3/IGFBP5/MMP12/CCR7/PTPRC/CD14/HMGCR/ANXA2/CCL11/HMOX1/INS/T…	219	BP
GO:0042493	response to drug	139/415	958/17910	5.88403072993354e-74	2.65992800938466e-71	1.01321916160651e-71	ABCA3/EDN1/CXCR4/NOS2/MET/UGT1A1/LEP/BRCA1/CYP2C19/COL1A1/GNAS/BCL2/ASS1/ALAD/CYP1A1/ACTC1/AGT/GSTP1/NFE2L2/HP/PPARGC1A/PDGFRB/TNF/ABCC2/PTGS2/B2M/CTNNB1/CYP2C9/CCND1/TYMS/TGFB1/MYC/IL13/SLC11A1/TNFAIP3/FOXO1/STAT1/GCLC/CCR7/SLC22A5/CD14/HMGCR/ABCD3/HMOX1/BGLAP/MMP3/IL10/MAPK1/MDM2/EGFR/SOD1/CREB1/SRC/HBB/TP53/CDKN1A/LPL/CAT/HADHA/CLDN1/NFKB1/SIRT1/ABCC1/IL1B/REN/NFKBIA/CPT1A/HAMP/SREBF1/NOD2/TLR…	139	BP
GO:0042592	homeostatic process	179/415	1730/17910	9.5387493370355e-74	4.07251603639544e-71	1.55130186586525e-71	EDN1/HSPB1/CXCR4/MPL/NOS2/SOD2/MET/LEP/ELANE/FOXP3/GNAS/APOE/BCL2/TF/GCK/EDNRA/TFR2/AGT/PKHD1/GSTP1/NFE2L2/GAA/ATP7B/BMP6/PPARGC1A/TNF/IL1A/CREBBP/LDLR/ABCC2/NOP10/JAK2/SFTPD/F2/XIAP/WNT5A/PTGS2/B2M/AGER/CTNNB1/ESR1/SCNN1B/VEGFA/TGFB1/MYC/PCSK9/IL13/SLC11A1/TNFAIP3/FOXO1/STAT1/GCLC/IGFBP5/CCR7/SLC22A5/PTPRC/HMGCR/ANXA2/FH/CCL11/HMOX1/INS/BGLAP/BRCA2/MAPK1/EGFR/SOD1/IL4/BBS4/SCT/GPR35/TERT/CETP/SR…	179	BP
GO:0019221	cytokine-mediated signaling pathway	126/415	764/17910	3.27533193429047e-73	1.32478557447486e-70	5.04637014363535e-71	MMP2/EDN1/CXCR4/MPL/NOS2/SOD2/LEP/BIRC5/BCL2/IRF3/IL5/HSPA8/GSTP1/FN1/TNF/IL1A/ITGB1/KRT8/THPO/JAK2/TNFRSF1A/WNT5A/PTGS2/B2M/CCND1/PSMB8/VEGFA/TGFB1/MYC/IL13/TNFAIP3/FOXO1/MMP1/STAT1/MMP12/CCR7/PTPRC/ANXA2/CCL11/HMOX1/MMP3/CXCR1/IL10/CXCL2/IKBKB/SOD1/IL4/BBS4/GPR35/CXCL10/CCL5/TP53/CDKN1A/NFKB1/SIRT1/IL1B/NFKBIA/NOD2/HLA-C/TWIST1/EPO/COL1A2/HGF/IL12RB1/IRF1/ALOX5/PTPN11/IFNA2/CSF1/TNFRSF11B/CD36/…	126	BP
GO:0007166	cell surface receptor signaling pathway	223/415	2831/17910	5.65082382181559e-73	2.17132905353264e-70	8.27102160445746e-71	MMP2/XDH/EDN1/HSPB1/CXCR4/MPL/IGF1/EP300/NOS2/SOD2/SEMA4D/FGFR1/MET/LEP/BRCA1/COL1A1/FOXP3/BIRC5/APOE/C3/PTK2/BCL2/IRF3/EZR/IL5/AGT/HSPA8/GSTP1/FN1/BMP6/PPARGC1A/SNAI1/PDGFRB/TNF/EGF/IL1A/CREBBP/ITGB1/KRT8/SHH/THPO/JAK2/TNFRSF1A/F2/XIAP/WNT5A/PTGS2/BMP7/B2M/AGER/CTNNB1/CCND1/NOTCH2/ESR1/PSMB8/VEGFA/TGFB1/MYC/NKX2-1/VCP/IL13/TNFAIP3/FOXO1/MMP1/STAT1/GCLC/IGFBP5/MMP12/CCR7/CR1/PTPRC/CD14/ANXA2/CCL1…	223	BP
GO:0048584	positive regulation of response to stimulus	203/415	2322/17910	1.49189969034484e-72	5.45964243823815e-70	2.0796857337589e-70	XDH/EDN1/HSPB1/CXCR4/IGF1/EP300/SEMA4D/FGFR1/MET/LEP/BRCA1/ELANE/COL1A1/FOXP3/APOE/C3/HSPD1/PTK2/BCL2/IRF3/EZR/IL5/AGT/NFE2L2/BMP6/PDGFRB/TNF/EGF/CREBBP/ITGB1/LDLR/SHH/THPO/JAK2/TNFRSF1A/SFTPD/F2/XIAP/WNT5A/PTGS2/BMP7/B2M/AGER/CTNNB1/NOTCH2/ESR1/PSMB8/VEGFA/TGFB1/MYC/VCP/IL13/SLC11A1/TNFAIP3/IGFBP5/MMP12/CCR7/CR1/PTPRC/CD14/HMGCR/EIF2AK2/HMOX1/INS/SMAD2/MMP3/TUBB2B/MMP8/IL10/MAPK1/EGFR/IKBKB/SOD1…	203	BP
GO:0051173	positive regulation of nitrogen compound metabolic process	223/415	2870/17910	8.23496002773116e-72	2.87662126423245e-69	1.09576190608231e-69	XDH/EDN1/HSPB1/CXCR4/IGF1/EP300/SEMA4D/FGFR1/MET/LEP/BRCA1/ELANE/COL1A1/FOXP3/APOE/AIRE/C3/HSPD1/PTK2/BCL2/GPD1/ASS1/TFR2/IRF3/EZR/IL5/AGT/HSPA8/TCF4/FN1/NFE2L2/NR1I3/BMP6/PPARGC1A/SNAI1/PDGFRB/TNF/EGF/IL1A/CREBBP/LDLR/SHH/THPO/JAK2/TNFRSF1A/SPP1/F2/XIAP/WNT5A/PTGS2/BMP7/AGER/CTNNB1/CCND1/NOTCH2/ESR1/VEGFA/TGFB1/MYC/PCSK9/NKX2-1/VCP/IL13/SLC11A1/TNFAIP3/FOXO1/STAT1/GCLC/MMP12/CCR7/CR1/PTPRC/HMGCR…	223	BP
GO:0010604	positive regulation of macromolecule metabolic process	229/415	3041/17910	1.03760815567705e-71	3.46696464190353e-69	1.32063536885028e-69	XDH/EDN1/HSPB1/CXCR4/IGF1/EP300/SEMA4D/FGFR1/MET/LEP/BRCA1/ELANE/COL1A1/FOXP3/APOE/AIRE/C3/HSPD1/PTK2/BCL2/GCK/TFR2/IRF3/ACTC1/EZR/IL5/AGT/CRP/HSPA8/TCF4/FN1/NFE2L2/NR1I3/BMP6/PPARGC1A/SNAI1/PDGFRB/TNF/EGF/IL1A/CREBBP/LDLR/SHH/THPO/JAK2/TNFRSF1A/SPP1/F2/XIAP/WNT5A/PTGS2/BMP7/AGER/CTNNB1/CCND1/NOTCH2/ESR1/VEGFA/TGFB1/MYC/PCSK9/NKX2-1/VCP/IL13/SLC11A1/TNFAIP3/FOXO1/STAT1/GCLC/MMP12/CCR7/CR1/PTPRC/H…	229	BP
GO:0002682	regulation of immune system process	168/415	1570/17910	1.2964398847724e-70	4.15130854769829e-68	1.5813154910316e-68	EDN1/MPL/IGF1/EP300/LEP/ELANE/COL1A1/FOXP3/GNAS/APOE/AIRE/C3/HSPD1/PTK2/BCL2/IRF3/EZR/IL5/NFE2L2/TNF/CREBBP/ITGB1/LDLR/SHH/THPO/JAK2/SFTPD/F2/XIAP/WNT5A/B2M/AGER/CTNNB1/NOTCH2/ESR1/PSMB8/VEGFA/TGFB1/MYC/IL13/SLC11A1/TNFAIP3/STAT1/MMP12/CCR7/CR1/PTPRC/CD14/GGT1/EIF2AK2/HMOX1/INS/BGLAP/MMP8/IL10/MAPK1/MMP14/IKBKB/SOD1/CREB1/TLR7/LGALS3/IL4/MAPK8/SRC/CXCL10/CCL5/CDKN1A/NFKB1/SIRT1/IL1B/NFKBIA/NOD2/H…	168	BP
GO:1901701	cellular response to oxygen-containing compound	142/415	1068/17910	1.43870435908825e-70	4.42257719983728e-68	1.68464708321028e-68	MMP2/EDN1/IGF1/NOS2/SOD2/MET/UGT1A1/LEP/BRCA1/COL1A1/PTK2/GPD1/GCK/ASS1/EZR/AGT/GSTP1/NFE2L2/BMP6/PPARGC1A/TNF/LDLR/ABCC2/JAK2/SPP1/WNT5A/PTGS2/BMP7/AGER/CTNNB1/ESR1/TGFB1/MRC1/PCSK9/VCP/TNFAIP3/FOXO1/STAT1/GCLC/IGFBP5/CD14/HMGCR/INS/BGLAP/MMP3/IL10/MAPK1/MDM2/EGFR/SOD1/CREB1/MAPK8/SRC/CXCL10/CCL5/TP53/LPL/CLDN1/NFKB1/SIRT1/IL1B/NFKBIA/CPT1A/HAMP/SREBF1/NOD2/TLR2/HAVCR2/NME1/AGTR2/COL1A2/HGF/HMGB…	142	BP
GO:0051247	positive regulation of protein metabolic process	166/415	1548/17910	9.13049632561366e-70	2.69876401009004e-67	1.02801256200533e-67	XDH/EDN1/HSPB1/CXCR4/IGF1/SEMA4D/FGFR1/LEP/BRCA1/ELANE/FOXP3/APOE/C3/HSPD1/PTK2/BCL2/TFR2/EZR/IL5/AGT/FN1/NFE2L2/BMP6/PPARGC1A/PDGFRB/TNF/EGF/IL1A/LDLR/THPO/JAK2/TNFRSF1A/F2/XIAP/WNT5A/PTGS2/BMP7/AGER/CTNNB1/CCND1/NOTCH2/VEGFA/TGFB1/MYC/PCSK9/VCP/IL13/SLC11A1/TNFAIP3/FOXO1/GCLC/CCR7/CR1/PTPRC/HMGCR/EIF2AK2/HMOX1/INS/MMP8/MAPK1/MMP14/MDM2/EGFR/SOD1/TLR7/PDGFA/IL4/MAPK8/SRC/CCL5/TP53/CDKN1A/SIRT1/I…	166	BP
GO:0002376	immune system process	226/415	3063/17910	1.08544918999504e-68	3.08951000930069e-66	1.17685543757357e-66	EDN1/CXCR4/MPL/IGF1/EP300/NOS2/SEMA4D/LEP/ELANE/COL1A1/FOXP3/GNAS/APOE/AIRE/C3/HSPD1/PTK2/BCL2/ASS1/ALAD/IRF3/EZR/IL5/CRP/HSPA8/GSTP1/FN1/NFE2L2/GAA/HP/BMP6/TNF/IL1A/CREBBP/ITGB1/LDLR/SHH/THPO/JAK2/SFTPD/F2/XIAP/WNT5A/B2M/AGER/CTNNB1/NOTCH2/ESR1/PSMB8/VEGFA/TGFB1/MYC/MRC1/VCP/IL13/SLC11A1/TNFAIP3/MMP1/STAT1/MMP12/CCR7/CR1/PTPRC/CD14/ANXA2/GGT1/EIF2AK2/CCL11/HMOX1/INS/BGLAP/BRCA2/CXCR1/MMP8/IL10/M…	226	BP
GO:0046903	secretion	166/415	1584/17910	2.97623577541208e-68	8.1687042621578e-66	3.11162093662443e-66	XDH/EDN1/IGF1/NOS2/FGFR1/LEP/ELANE/FOXP3/GNAS/APOE/C3/TF/GCK/ALAD/TFR2/IRF3/EZR/IL5/AGT/CRP/HSPA8/GSTP1/FN1/GAA/HP/ATP7B/BMP6/TNF/EGF/IL1A/ABCC2/JAK2/TNFRSF1A/SPP1/WNT5A/B2M/AGER/CCND1/VEGFA/TGFB1/VCP/IL13/SLC11A1/TNFAIP3/MMP12/CCR7/CR1/PTPRC/CD14/HMGCR/ANXA2/HMOX1/INS/EXOC4/SMAD2/CXCR1/MMP8/IL10/MAPK1/EGFR/SOD1/APOH/CREB1/LGALS3/PDGFA/SCT/SRC/HBB/PLG/CCL5/LPL/CAT/IDH1/NFKB1/IL1B/REN/AGXT/ALB/CPT…	166	BP
GO:0001775	cell activation	154/415	1342/17910	4.36548443059912e-68	1.15685337410877e-65	4.40668319473544e-66	EDN1/HSPB1/MPL/IGF1/EP300/LEP/ELANE/COL1A1/FOXP3/GNAS/APOE/C3/HSPD1/BCL2/ALAD/IL5/HSPA8/GSTP1/GAA/HP/PDGFRB/TNF/ITGB1/LDLR/SHH/JAK2/SFTPD/F2/WNT5A/B2M/AGER/CTNNB1/NOTCH2/TGFB1/VCP/IL13/SLC11A1/TNFAIP3/GCLC/CCR7/CR1/PTPRC/CD14/ANXA2/HMOX1/INS/CXCR1/MMP8/IL10/MAPK1/MMP14/EGFR/SOD1/TLR7/LGALS3/PDGFA/IL4/SRC/HBB/CXCL10/CCL5/TP53/CDKN1A/CAT/IDH1/NFKB1/IL1B/NOD2/TLR2/HAVCR2/EPO/COL1A2/HMGB1/DNASE1/IL12…	154	BP
GO:0008283	cell proliferation	183/415	1969/17910	5.01755274265737e-68	1.28532976091073e-65	4.89607514994041e-66	MMP2/XDH/EDN1/MPL/IGF1/NOS2/SOD2/FGFR1/LEP/BRCA1/ELANE/FOXP3/BIRC5/APOE/HSPD1/PTK2/BCL2/GUCY2C/EDNRA/CYP1A1/IL5/AGT/PKHD1/RARB/GSTP1/FN1/BMP6/PPARGC1A/PDGFRB/TNF/EGF/IL1A/ITGB1/SHH/THPO/JAK2/SFTPD/F2/XIAP/WNT5A/PTGS2/BMP7/AGER/CTNNB1/CCND1/NOTCH2/ESR1/ACE2/VEGFA/TGFB1/MYC/IL13/SLC11A1/TNFAIP3/FOXO1/STAT1/IGFBP5/MMP12/PTPRC/HMGCR/EIF2AK2/CCL11/HMOX1/INS/SMAD2/BRCA2/IL10/MAPK1/MMP14/MDM2/EGFR/APOH/…	183	BP
GO:0080134	regulation of response to stress	166/415	1592/17910	6.37001750203151e-68	1.57914788719717e-65	6.01528647645149e-66	XDH/EDN1/HSPB1/CXCR4/IGF1/EP300/NOS2/SOD2/MET/LEP/BRCA1/ELANE/FOXP3/APOE/C3/HSPD1/BCL2/IRF3/EZR/AGT/HSPA8/GSTP1/NFE2L2/SNAI1/TNF/CREBBP/LDLR/JAK2/TNFRSF1A/SPP1/SFTPD/F2/XIAP/WNT5A/PTGS2/BMP7/AGER/CTNNB1/ESR1/ACE2/PSMB8/VEGFA/MYC/TNFAIP3/FOXO1/STAT1/MMP12/CCR7/CR1/PTPRC/CD14/HMGCR/GGT1/EIF2AK2/INS/MMP3/MMP8/IL10/MAPK1/PLAT/MDM2/EGFR/IKBKB/SOD1/APOH/TLR7/PDGFA/IL4/TERT/SRC/PLG/CCL5/TP53/CDKN1A/LPL/…	166	BP
GO:0048583	regulation of response to stimulus	264/415	4275/17910	7.11131444905268e-68	1.70782661065531e-65	6.50544917197879e-66	XDH/EDN1/HSPB1/CXCR4/IGF1/EP300/NOS2/SOD2/SEMA4D/FGFR1/MET/LEP/BRCA1/ELANE/COL1A1/FOXP3/APOE/C3/HSPD1/PTK2/BCL2/IRF3/EZR/IL5/AGT/PKHD1/HSPA8/GSTP1/FN1/NFE2L2/BMP6/PPARGC1A/SNAI1/PDGFRB/TNF/EGF/IL1A/CREBBP/ITGB1/LDLR/SHH/THPO/JAK2/TNFRSF1A/SPP1/SFTPD/F2/XIAP/WNT5A/PTGS2/BMP7/B2M/AGER/CTNNB1/NOTCH2/ESR1/ACE2/PSMB8/VEGFA/TGFB1/MYC/PCSK9/NKX2-1/VCP/IL13/SLC11A1/TNFAIP3/FOXO1/STAT1/GCLC/IGFBP5/MMP12/C…	264	BP
GO:0042127	regulation of cell proliferation	168/415	1664/17910	9.37696156419406e-67	2.1836954430555e-64	8.31812762680181e-65	MMP2/XDH/EDN1/MPL/IGF1/NOS2/SOD2/FGFR1/LEP/BRCA1/ELANE/FOXP3/BIRC5/APOE/PTK2/BCL2/GUCY2C/IL5/AGT/PKHD1/RARB/GSTP1/FN1/BMP6/PPARGC1A/PDGFRB/TNF/EGF/IL1A/ITGB1/SHH/THPO/JAK2/SFTPD/F2/XIAP/WNT5A/PTGS2/BMP7/AGER/CTNNB1/CCND1/NOTCH2/ESR1/ACE2/VEGFA/TGFB1/MYC/IL13/TNFAIP3/FOXO1/STAT1/IGFBP5/MMP12/PTPRC/HMGCR/EIF2AK2/CCL11/HMOX1/INS/SMAD2/BRCA2/IL10/MAPK1/MDM2/EGFR/APOH/CREB1/LGALS3/PDGFA/IL4/TERT/CXCL1…	168	BP
GO:0065009	regulation of molecular function	223/415	3065/17910	2.7838972645528e-66	6.29242661120242e-64	2.39690968814902e-64	XDH/EDN1/HSPB1/CXCR4/IGF1/EP300/SEMA4D/FGFR1/MET/UGT1A1/LEP/CYP2D6/ELANE/FOXP3/BIRC5/GNAS/APOE/C3/HSPD1/PTK2/BCL2/EDNRA/IL5/AGT/PKHD1/GSTP1/FN1/HP/BMP6/PPARGC1A/PDGFRB/TNF/EGF/IL1A/ITGB1/SHH/THPO/JAK2/SPP1/SFTPD/F2/XIAP/WNT5A/PTGS2/BMP7/B2M/AGER/CTNNB1/CCND1/ESR1/PSMB8/VEGFA/TGFB1/MYC/PCSK9/VCP/IL13/SLC11A1/TNFAIP3/CCR7/CR1/PTPRC/HMGCR/ANXA2/EIF2AK2/CCL11/HMOX1/INS/SMAD2/MMP8/IL10/MAPK1/MDM2/CXCL…	223	BP
GO:0010941	regulation of cell death	167/415	1659/17910	4.32238430848865e-66	9.49072097449578e-64	3.61520323666374e-64	XDH/EDN1/HSPB1/CXCR4/IGF1/SOD2/SEMA4D/FGFR1/MET/LEP/BRCA1/BIRC5/APOE/HSPD1/PTK2/BCL2/ACTC1/AGT/PKHD1/RARB/GSTP1/NFE2L2/HP/PPARGC1A/SNAI1/PDGFRB/TNF/IL1A/CREBBP/ITGB1/SHH/JAK2/TNFRSF1A/XIAP/WNT5A/PTGS2/BMP7/CTNNB1/NOTCH2/ESR1/VEGFA/TGFB1/MYC/PCSK9/VCP/IL13/TNFAIP3/FOXO1/STAT1/GCLC/CCR7/PTPRC/HMGCR/EIF2AK2/HMOX1/INS/MMP3/IL10/MDM2/EGFR/IKBKB/SOD1/APOH/CREB1/LGALS3/IL4/MAPK8/TERT/SRC/HBB/CXCL10/CCL5…	167	BP
GO:0002237	response to molecule of bacterial origin	83/415	309/17910	3.23493965483192e-65	6.90569756871759e-63	2.63051671932385e-63	EDN1/NOS2/UGT1A1/ELANE/ASS1/ALAD/CYP1A1/GSTP1/BMP6/PPARGC1A/TNF/ABCC2/JAK2/WNT5A/PTGS2/B2M/TGFB1/MRC1/IL13/SLC11A1/TNFAIP3/CCR7/CD14/IL10/MAPK1/CXCL2/MAPK8/SRC/CXCL10/CCL5/CLDN1/NFKB1/IL1B/REN/NFKBIA/HAMP/NOD2/TLR2/HAVCR2/EPO/HMGB1/NLRP3/CD36/LBP/CASP8/RHOA/CXCL8/SELE/THBD/MAPK14/MPO/VIM/CSF3/CHUK/ARG1/SLPI/SCARB1/S100A8/CCL2/IL6/CASP3/CYP1A2/LYN/FOS/ICAM1/TNFRSF1B/MAPK3/LTF/RELA/NOS3/TLR4/SERPIN…	83	BP
GO:0008219	cell death	188/415	2178/17910	5.82515593363252e-65	1.20990063108016e-62	4.60875068319546e-63	XDH/EDN1/HSPB1/CXCR4/IGF1/EP300/SOD2/SEMA4D/FGFR1/MET/LEP/BRCA1/BIRC5/APOE/HSPD1/PTK2/BCL2/IRF3/ACTC1/AGT/PKHD1/RARB/GSTP1/NFE2L2/HP/PPARGC1A/SNAI1/PDGFRB/TNF/IL1A/CREBBP/ITGB1/KRT8/SHH/JAK2/TNFRSF1A/XIAP/WNT5A/PTGS2/BMP7/CTNNB1/NOTCH2/ESR1/VEGFA/TGFB1/MYC/PCSK9/VCP/IL13/TNFAIP3/FOXO1/STAT1/GCLC/CCR7/PTPRC/CD14/HMGCR/EIF2AK2/HMOX1/INS/MMP3/BRCA2/IL10/MAPK1/MDM2/EGFR/IKBKB/SOD1/APOH/CREB1/LGALS3/I…	188	BP
GO:0050793	regulation of developmental process	204/415	2598/17910	1.19626272163878e-64	2.41928395152474e-62	9.21553082791537e-63	XDH/EDN1/HSPB1/CXCR4/MPL/IGF1/EP300/SOD2/SEMA4D/FGFR1/LEP/BRCA1/COL1A1/DGUOK/FOXP3/GNAS/APOE/C3/PTK2/BCL2/EZR/IL5/AGT/CRP/RARB/TCF4/FN1/NFE2L2/BMP6/PPARGC1A/SNAI1/PDGFRB/TNF/EGF/IL1A/CREBBP/ITGB1/LDLR/SHH/THPO/JAK2/TNFRSF1A/SPP1/F2/WNT5A/PTGS2/BMP7/B2M/AGER/CTNNB1/CCND1/NOTCH2/ESR1/PSMB8/VEGFA/TGFB1/MYC/NKX2-1/IL13/TNFAIP3/FOXO1/STAT1/IGFBP5/CR1/PTPRC/HMGCR/ANXA2/EIF2AK2/CCL11/HMOX1/INS/SMAD2/BGL…	204	BP
GO:0006952	defense response	166/415	1681/17910	2.22147913263608e-64	4.37745311136109e-62	1.6674584258734e-62	EDN1/CXCR4/IGF1/EP300/NOS2/UGT1A1/LEP/ELANE/FOXP3/APOE/C3/HSPD1/BCL2/ASS1/TFR2/IRF3/IL5/AGT/CRP/GSTP1/FN1/NFE2L2/HP/BMP6/TNF/IL1A/CREBBP/ITGB1/LDLR/JAK2/TNFRSF1A/SPP1/SFTPD/F2/XIAP/WNT5A/PTGS2/B2M/AGER/ESR1/ACE2/PSMB8/TGFB1/MRC1/IL13/SLC11A1/TNFAIP3/STAT1/MMP12/CCR7/CR1/PTPRC/CD14/GGT1/EIF2AK2/CCL11/HMOX1/INS/MMP3/MMP8/IL10/EGFR/IKBKB/SOD1/TLR7/LGALS3/IL4/SRC/CXCL10/CCL5/TP53/UMOD/LPL/CLDN1/NFKB1…	166	BP
GO:0048513	animal organ development	232/415	3403/17910	2.35140251496694e-64	4.51763208188024e-62	1.72085536687449e-62	MMP2/XDH/EDN1/CXCR4/MPL/IGF1/EP300/SEMA4D/FGFR1/MET/UGT1A1/LEP/COL1A1/FOXP3/GNAS/AIRE/PTK2/BCL2/ASS1/EDNRA/CYP1A1/ACTC1/IL5/AGT/PKHD1/RARB/GSTP1/FN1/NFE2L2/GAA/ATP7B/BMP6/PPARGC1A/SNAI1/PDGFRB/TNF/EGF/CREBBP/ITGB1/KRT8/SHH/THPO/JAK2/TNFRSF1A/SPP1/SFTPD/WNT5A/PTGS2/BMP7/B2M/AGER/CTNNB1/CCND1/NOTCH2/ESR1/TYMS/PSMB8/VEGFA/TGFB1/MYC/PCSK9/NKX2-1/IL13/TNFAIP3/FOXO1/STAT1/IGFBP5/CCR7/CR1/PTPRC/HMGCR/AN…	232	BP
GO:0023056	positive regulation of signaling	168/415	1736/17910	5.60793037180481e-64	1.05114499773951e-61	4.00401909216667e-62	XDH/EDN1/CXCR4/IGF1/EP300/SEMA4D/FGFR1/MET/LEP/ELANE/COL1A1/APOE/C3/PTK2/BCL2/GCK/TFR2/IRF3/IL5/AGT/BMP6/PDGFRB/TNF/EGF/CREBBP/ITGB1/SHH/THPO/JAK2/TNFRSF1A/SPP1/F2/XIAP/WNT5A/PTGS2/BMP7/AGER/CTNNB1/NOTCH2/ESR1/PSMB8/VEGFA/TGFB1/VCP/IL13/IGFBP5/MMP12/CCR7/PTPRC/CD14/HMGCR/ANXA2/EIF2AK2/HMOX1/INS/SMAD2/MMP8/IL10/MAPK1/EGFR/IKBKB/SOD1/CREB1/TLR7/PDGFA/IL4/SCT/MAPK8/TERT/SRC/CCL5/TP53/CAT/NFKB1/SIRT1…	168	BP
GO:0032270	positive regulation of cellular protein metabolic process	155/415	1458/17910	7.03996184467775e-64	1.28814539943687e-61	4.90680047369644e-62	XDH/EDN1/CXCR4/IGF1/SEMA4D/FGFR1/LEP/BRCA1/ELANE/FOXP3/APOE/C3/HSPD1/PTK2/BCL2/EZR/IL5/AGT/FN1/NFE2L2/BMP6/PPARGC1A/PDGFRB/TNF/EGF/LDLR/THPO/JAK2/TNFRSF1A/F2/XIAP/WNT5A/PTGS2/BMP7/AGER/CTNNB1/CCND1/NOTCH2/VEGFA/TGFB1/MYC/PCSK9/VCP/IL13/SLC11A1/TNFAIP3/GCLC/CCR7/CR1/PTPRC/HMGCR/EIF2AK2/INS/MMP8/MAPK1/MMP14/MDM2/EGFR/SOD1/PDGFA/IL4/SRC/CCL5/TP53/CDKN1A/SIRT1/IL1B/NFKBIA/IGFBP3/SREBF1/NOD2/HAVCR2/AG…	155	BP
GO:0014070	response to organic cyclic compound	124/415	878/17910	8.00581823345645e-64	1.43080728195611e-61	5.45022778635064e-62	ABCA3/EDN1/CXCR4/EP300/UGT1A1/LEP/BRCA1/COL1A1/BCL2/GPD1/ASS1/ALAD/CYP1A1/IRF3/EZR/AGT/RARB/GSTP1/NR1I3/BMP6/PPARGC1A/PDGFRB/TNF/ABCC2/JAK2/SPP1/PTGS2/BMP7/CTNNB1/CCND1/ESR1/TYMS/TGFB1/FOXO1/STAT1/GCLC/IGFBP5/ABCD3/SMAD2/BGLAP/IL10/MAPK1/MMP14/MDM2/EGFR/SOD1/SRC/CXCL10/CCL5/CDKN1A/CAT/IDH1/CLDN1/NFKB1/SIRT1/IL1B/REN/AGXT/NFKBIA/CPT1A/HAMP/SREBF1/NOD2/TLR2/NME1/AGTR2/EPO/TGFB2/PTEN/AXIN1/RXRA/PKD2…	124	BP
GO:0006954	inflammatory response	118/415	784/17910	1.31684767457183e-63	2.29999417706467e-61	8.76113249517768e-62	CXCR4/IGF1/NOS2/UGT1A1/LEP/ELANE/FOXP3/APOE/C3/ASS1/TFR2/IL5/AGT/CRP/GSTP1/FN1/NFE2L2/HP/BMP6/TNF/IL1A/LDLR/JAK2/TNFRSF1A/SPP1/F2/XIAP/WNT5A/PTGS2/AGER/ESR1/ACE2/TGFB1/IL13/SLC11A1/TNFAIP3/CCR7/CR1/PTPRC/GGT1/CCL11/HMOX1/INS/MMP3/MMP8/IL10/EGFR/IKBKB/SOD1/TLR7/IL4/CCL5/LPL/NFKB1/IL1B/NFKBIA/HAMP/NOD2/TLR2/HAVCR2/EPO/HGF/HMGB1/DNASE1/ALOX5/NLRP3/TGM2/SMAD3/IFNA2/CSF1/CD36/LBP/CXCR2/PPARG/SERPINA1/…	118	BP
GO:0010647	positive regulation of cell communication	167/415	1730/17910	2.30641515615899e-63	3.93884455001818e-61	1.50038375421711e-61	XDH/EDN1/CXCR4/IGF1/EP300/SEMA4D/FGFR1/MET/LEP/ELANE/COL1A1/APOE/C3/PTK2/BCL2/GCK/TFR2/IRF3/IL5/AGT/BMP6/PDGFRB/TNF/EGF/CREBBP/ITGB1/SHH/THPO/JAK2/TNFRSF1A/SPP1/F2/XIAP/WNT5A/PTGS2/BMP7/AGER/CTNNB1/NOTCH2/ESR1/PSMB8/VEGFA/TGFB1/VCP/IL13/IGFBP5/MMP12/CCR7/PTPRC/CD14/HMGCR/EIF2AK2/HMOX1/INS/SMAD2/MMP8/IL10/MAPK1/EGFR/IKBKB/SOD1/CREB1/TLR7/PDGFA/IL4/SCT/MAPK8/TERT/SRC/CCL5/TP53/CAT/NFKB1/SIRT1/IL1B/…	167	BP
GO:0009607	response to biotic stimulus	127/415	938/17910	2.69677691418302e-63	4.50537621423838e-61	1.71618686460938e-61	EDN1/HSPB1/CXCR4/NOS2/UGT1A1/ELANE/FOXP3/C3/HSPD1/BCL2/ASS1/ALAD/CYP1A1/IRF3/CRP/GSTP1/HP/BMP6/PPARGC1A/TNF/ABCC2/KRT8/JAK2/TNFRSF1A/SFTPD/F2/WNT5A/PTGS2/B2M/TGFB1/MRC1/IL13/SLC11A1/TNFAIP3/STAT1/MMP12/CCR7/PTPRC/CD14/EIF2AK2/CCL11/IL10/MAPK1/CXCL2/IKBKB/TLR7/MAPK8/SRC/CXCL10/CCL5/TP53/LPL/CLDN1/NFKB1/IL1B/REN/NFKBIA/HAMP/NOD2/TLR2/HAVCR2/EPO/HMGB1/IL12RB1/IRF1/NLRP3/SMAD3/IFNA2/CD36/LBP/CASP8/RH…	127	BP
GO:0032496	response to lipopolysaccharide	80/415	295/17910	3.68646270645521e-63	6.02775870193794e-61	2.29609244941813e-61	EDN1/NOS2/UGT1A1/ELANE/ASS1/ALAD/CYP1A1/GSTP1/BMP6/PPARGC1A/TNF/ABCC2/JAK2/WNT5A/PTGS2/TGFB1/MRC1/IL13/SLC11A1/TNFAIP3/CCR7/CD14/IL10/MAPK1/MAPK8/SRC/CXCL10/CCL5/CLDN1/NFKB1/IL1B/REN/NFKBIA/HAMP/NOD2/TLR2/HAVCR2/EPO/HMGB1/NLRP3/CD36/LBP/CASP8/RHOA/CXCL8/SELE/THBD/MAPK14/MPO/VIM/CSF3/CHUK/ARG1/SLPI/SCARB1/S100A8/CCL2/IL6/CASP3/CYP1A2/LYN/FOS/ICAM1/TNFRSF1B/MAPK3/LTF/RELA/NOS3/TLR4/SERPINE1/VCAM1/A…	80	BP
GO:0032101	regulation of response to external stimulus	123/415	873/17910	3.85990533264008e-63	6.17986926694563e-61	2.35403437062984e-61	EDN1/HSPB1/CXCR4/IGF1/NOS2/FGFR1/MET/LEP/ELANE/FOXP3/APOE/C3/AGT/GSTP1/NFE2L2/BMP6/PDGFRB/TNF/LDLR/JAK2/TNFRSF1A/SPP1/F2/XIAP/WNT5A/PTGS2/AGER/ESR1/ACE2/VEGFA/TGFB1/TNFAIP3/STAT1/MMP12/CCR7/CR1/PTPRC/HMGCR/GGT1/INS/MMP3/TUBB2B/MMP8/IL10/PLAT/EGFR/SOD1/APOH/TLR7/PDGFA/IL4/BBS4/CXCL10/PLG/CCL5/CDKN1A/LPL/NFKB1/IL1B/NFKBIA/NOD2/TLR2/HAVCR2/HGF/HMGB1/DNASE1/IL12RB1/PLAU/PTEN/NLRP3/TGM2/SMAD3/CSF1/CD3…	123	BP
GO:0009967	positive regulation of signal transduction	159/415	1591/17910	6.13516519324878e-62	9.62219275716672e-60	3.66528343768526e-60	XDH/EDN1/CXCR4/IGF1/EP300/SEMA4D/FGFR1/MET/LEP/ELANE/COL1A1/APOE/C3/PTK2/BCL2/IRF3/IL5/AGT/BMP6/PDGFRB/TNF/EGF/CREBBP/ITGB1/SHH/THPO/JAK2/TNFRSF1A/F2/XIAP/WNT5A/BMP7/AGER/CTNNB1/NOTCH2/ESR1/PSMB8/VEGFA/TGFB1/VCP/IL13/IGFBP5/MMP12/CCR7/PTPRC/CD14/HMGCR/EIF2AK2/HMOX1/INS/SMAD2/MMP8/IL10/MAPK1/EGFR/IKBKB/SOD1/TLR7/PDGFA/IL4/SCT/MAPK8/TERT/SRC/CCL5/TP53/CAT/NFKB1/SIRT1/IL1B/IGFBP3/NOD2/TLR2/HAVCR2/AG…	159	BP
GO:2000026	regulation of multicellular organismal development	180/415	2077/17910	7.64867884257801e-62	1.17560193810424e-59	4.47810018130725e-60	XDH/EDN1/HSPB1/CXCR4/MPL/IGF1/EP300/SOD2/SEMA4D/FGFR1/LEP/BRCA1/COL1A1/DGUOK/FOXP3/GNAS/APOE/C3/PTK2/BCL2/IL5/AGT/RARB/TCF4/FN1/NFE2L2/BMP6/SNAI1/PDGFRB/TNF/EGF/IL1A/CREBBP/ITGB1/LDLR/SHH/THPO/TNFRSF1A/SPP1/F2/WNT5A/PTGS2/BMP7/B2M/AGER/CTNNB1/CCND1/NOTCH2/ESR1/PSMB8/VEGFA/TGFB1/MYC/NKX2-1/IL13/TNFAIP3/STAT1/CR1/PTPRC/HMGCR/EIF2AK2/CCL11/HMOX1/SMAD2/BGLAP/BRCA2/TUBB2B/IL10/MAPK1/MMP14/MDM2/EGFR/IK…	180	BP
GO:1902533	positive regulation of intracellular signal transduction	130/415	1019/17910	8.96674823873234e-62	1.35116588656192e-59	5.14685796737144e-60	XDH/EDN1/CXCR4/IGF1/EP300/SEMA4D/FGFR1/MET/LEP/ELANE/APOE/PTK2/BCL2/IRF3/IL5/AGT/PDGFRB/TNF/EGF/ITGB1/THPO/JAK2/TNFRSF1A/F2/WNT5A/AGER/CTNNB1/NOTCH2/ESR1/VEGFA/TGFB1/IL13/IGFBP5/CCR7/PTPRC/CD14/HMGCR/EIF2AK2/HMOX1/INS/MMP8/IL10/MAPK1/EGFR/IKBKB/SOD1/TLR7/PDGFA/IL4/SCT/SRC/CCL5/TP53/CAT/SIRT1/IL1B/IGFBP3/NOD2/TLR2/HAVCR2/EPO/HGF/HMGB1/TGFB2/PTEN/AXIN1/TGM2/NOS1/PKD2/PTPN11/IFNA2/EZH2/CSF1/CD36/CAS…	130	BP
GO:0051246	regulation of protein metabolic process	204/415	2700/17910	1.03515331108542e-61	1.52983715301758e-59	5.82745214196062e-60	XDH/EDN1/HSPB1/CXCR4/IGF1/EP300/NOS2/SEMA4D/FGFR1/LEP/BRCA1/ELANE/FOXP3/BIRC5/APOE/AIRE/C3/HSPD1/PTK2/BCL2/ALAD/TFR2/EZR/IL5/AGT/PKHD1/GSTP1/FN1/NFE2L2/BMP6/PPARGC1A/PDGFRB/TNF/EGF/IL1A/LDLR/SHH/THPO/JAK2/TNFRSF1A/SFTPD/F2/XIAP/WNT5A/PTGS2/BMP7/AGER/CTNNB1/CCND1/NOTCH2/TYMS/PSMB8/VEGFA/TGFB1/MYC/PCSK9/VCP/IL13/SLC11A1/TNFAIP3/FOXO1/GCLC/IGFBP5/CCR7/CR1/PTPRC/HMGCR/ANXA2/EIF2AK2/HMOX1/INS/MMP8/IL1…	204	BP
GO:0023051	regulation of signaling	236/415	3635/17910	1.10921942027099e-61	1.60836815939293e-59	6.12659226965962e-60	XDH/EDN1/HSPB1/CXCR4/IGF1/EP300/NOS2/SOD2/SEMA4D/FGFR1/MET/LEP/BRCA1/ELANE/COL1A1/FOXP3/GNAS/APOE/C3/PTK2/BCL2/GCK/TFR2/IRF3/EZR/IL5/AGT/PKHD1/GSTP1/FN1/NFE2L2/BMP6/PPARGC1A/SNAI1/PDGFRB/TNF/EGF/IL1A/CREBBP/ITGB1/SHH/THPO/JAK2/TNFRSF1A/SPP1/F2/XIAP/WNT5A/PTGS2/BMP7/AGER/CTNNB1/NOTCH2/ESR1/ACE2/PSMB8/VEGFA/TGFB1/MYC/PCSK9/NKX2-1/VCP/IL13/TNFAIP3/FOXO1/STAT1/GCLC/IGFBP5/MMP12/CCR7/PTPRC/CD14/HMGCR/…	236	BP
GO:0032940	secretion by cell	152/415	1449/17910	1.17315051041786e-61	1.66956697640023e-59	6.35971066173893e-60	EDN1/IGF1/NOS2/FGFR1/LEP/ELANE/FOXP3/GNAS/APOE/C3/TF/GCK/ALAD/TFR2/IRF3/EZR/IL5/AGT/CRP/HSPA8/GSTP1/FN1/GAA/HP/BMP6/TNF/EGF/IL1A/JAK2/TNFRSF1A/SPP1/WNT5A/B2M/AGER/VEGFA/TGFB1/VCP/IL13/SLC11A1/TNFAIP3/MMP12/CCR7/CR1/PTPRC/CD14/HMGCR/ANXA2/HMOX1/INS/EXOC4/SMAD2/CXCR1/MMP8/IL10/MAPK1/EGFR/SOD1/APOH/CREB1/LGALS3/PDGFA/SRC/HBB/PLG/CCL5/LPL/CAT/IDH1/NFKB1/IL1B/REN/ALB/CPT1A/SREBF1/NOD2/TLR2/HAVCR2/AGTR…	152	BP
GO:0010646	regulation of cell communication	234/415	3589/17910	2.67964399870838e-61	3.74419347819525e-59	1.42623731299675e-59	XDH/EDN1/HSPB1/CXCR4/IGF1/EP300/NOS2/SOD2/SEMA4D/FGFR1/MET/LEP/BRCA1/ELANE/COL1A1/FOXP3/GNAS/APOE/C3/PTK2/BCL2/GCK/TFR2/IRF3/EZR/IL5/AGT/PKHD1/GSTP1/FN1/NFE2L2/BMP6/PPARGC1A/SNAI1/PDGFRB/TNF/EGF/IL1A/CREBBP/ITGB1/SHH/THPO/JAK2/TNFRSF1A/SPP1/F2/XIAP/WNT5A/PTGS2/BMP7/AGER/CTNNB1/NOTCH2/ESR1/PSMB8/VEGFA/TGFB1/MYC/PCSK9/NKX2-1/VCP/IL13/TNFAIP3/FOXO1/STAT1/GCLC/IGFBP5/MMP12/CCR7/PTPRC/CD14/HMGCR/EIF2A…	234	BP
GO:0006915	apoptotic process	172/415	1907/17910	3.9654530490898e-61	5.44187619325985e-59	2.07291821983435e-59	XDH/EDN1/HSPB1/CXCR4/IGF1/EP300/SOD2/SEMA4D/FGFR1/LEP/BRCA1/BIRC5/HSPD1/PTK2/BCL2/IRF3/ACTC1/AGT/PKHD1/RARB/GSTP1/NFE2L2/PPARGC1A/SNAI1/PDGFRB/TNF/IL1A/CREBBP/ITGB1/KRT8/SHH/JAK2/TNFRSF1A/XIAP/WNT5A/PTGS2/BMP7/CTNNB1/NOTCH2/ESR1/VEGFA/TGFB1/MYC/PCSK9/VCP/IL13/TNFAIP3/FOXO1/STAT1/GCLC/CCR7/PTPRC/CD14/HMGCR/EIF2AK2/HMOX1/INS/BRCA2/IL10/MAPK1/MDM2/EGFR/IKBKB/SOD1/APOH/CREB1/LGALS3/IL4/MAPK8/TERT/SRC…	172	BP
GO:0051049	regulation of transport	166/415	1773/17910	5.8823999002997e-61	7.9309198655795e-59	3.02104415932289e-59	EDN1/CXCR4/IGF1/NOS2/FGFR1/LEP/FOXP3/GNAS/APOE/C3/BCL2/TF/GCK/EDNRA/TFR2/IRF3/EZR/IL5/AGT/HPS4/CRP/HSPA8/FN1/NFE2L2/BMP6/PPARGC1A/PDGFRB/TNF/EGF/IL1A/SHH/JAK2/TNFRSF1A/SPP1/SFTPD/F2/WNT5A/PTGS2/B2M/AGER/CTNNB1/ACE2/VEGFA/TGFB1/PCSK9/IL13/SLC11A1/TNFAIP3/MMP12/CCR7/PTPRC/CD14/HMGCR/ANXA2/HMOX1/INS/MMP8/IL10/MAPK1/MDM2/EGFR/SOD1/CREB1/LGALS3/IL4/MAPK8/GPR35/TERT/CETP/SRC/CXCL10/CCL5/TP53/LPL/NFKB1/…	166	BP
GO:0009719	response to endogenous stimulus	156/415	1560/17910	1.28575094433903e-60	1.70362000124922e-58	6.4894253651667e-59	ABCA3/MMP2/EDN1/IGF1/EP300/FGFR1/UGT1A1/LEP/BRCA1/COL1A1/APOE/PTK2/BCL2/GPD1/GCK/ASS1/ALAD/EZR/AGT/RARB/GSTP1/NFE2L2/NR1I3/BMP6/PPARGC1A/PDGFRB/TNF/CREBBP/ITGB1/LDLR/ABCC2/JAK2/SPP1/XIAP/WNT5A/PTGS2/BMP7/AGER/CTNNB1/CCND1/ESR1/TYMS/TGFB1/PCSK9/NKX2-1/FOXO1/STAT1/GCLC/IGFBP5/CCR7/ANXA2/INS/SMAD2/BGLAP/IL10/MAPK1/MMP14/MDM2/EGFR/SOD1/CREB1/BBS4/SRC/CCL5/TP53/CDKN1A/LPL/CAT/HADHA/IDH1/CLDN1/NFKB1/SI…	156	BP
GO:0051707	response to other organism	122/415	903/17910	1.81573316457841e-60	2.36506938470934e-58	9.00901682549967e-59	EDN1/HSPB1/CXCR4/NOS2/UGT1A1/ELANE/FOXP3/C3/BCL2/ASS1/ALAD/CYP1A1/IRF3/CRP/GSTP1/HP/BMP6/PPARGC1A/TNF/ABCC2/KRT8/JAK2/TNFRSF1A/SFTPD/F2/WNT5A/PTGS2/B2M/TGFB1/MRC1/IL13/SLC11A1/TNFAIP3/STAT1/MMP12/CCR7/PTPRC/CD14/EIF2AK2/CCL11/IL10/MAPK1/CXCL2/IKBKB/TLR7/MAPK8/SRC/CXCL10/CCL5/LPL/CLDN1/NFKB1/IL1B/REN/NFKBIA/HAMP/NOD2/TLR2/HAVCR2/EPO/HMGB1/IL12RB1/IRF1/NLRP3/SMAD3/IFNA2/CD36/LBP/CASP8/RHOA/CXCL8/SE…	122	BP
GO:0043207	response to external biotic stimulus	122/415	905/17910	2.34396317744602e-60	3.00222616977878e-58	1.14360729762761e-58	EDN1/HSPB1/CXCR4/NOS2/UGT1A1/ELANE/FOXP3/C3/BCL2/ASS1/ALAD/CYP1A1/IRF3/CRP/GSTP1/HP/BMP6/PPARGC1A/TNF/ABCC2/KRT8/JAK2/TNFRSF1A/SFTPD/F2/WNT5A/PTGS2/B2M/TGFB1/MRC1/IL13/SLC11A1/TNFAIP3/STAT1/MMP12/CCR7/PTPRC/CD14/EIF2AK2/CCL11/IL10/MAPK1/CXCL2/IKBKB/TLR7/MAPK8/SRC/CXCL10/CCL5/LPL/CLDN1/NFKB1/IL1B/REN/NFKBIA/HAMP/NOD2/TLR2/HAVCR2/EPO/HMGB1/IL12RB1/IRF1/NLRP3/SMAD3/IFNA2/CD36/LBP/CASP8/RHOA/CXCL8/SE…	122	BP
GO:0006810	transport	268/415	4785/17910	6.68581670496625e-60	8.42303301273207e-58	3.20849978542039e-58	ABCA3/XDH/EDN1/ABCB7/HSPB1/CXCR4/IGF1/NOS2/FGFR1/LEP/ELANE/COL1A1/FOXP3/GNAS/APOE/C3/PTK2/BCL2/TF/GCK/ALAD/EDNRA/TFR2/IRF3/EZR/IL5/AGT/HPS4/CRP/HSPA8/GSTP1/FN1/NFE2L2/GAA/HP/ATP7B/BMP6/PPARGC1A/PDGFRB/TNF/EGF/IL1A/ITGB1/LDLR/ABCC2/SHH/JAK2/TNFRSF1A/SPP1/SFTPD/F2/WNT5A/PTGS2/B2M/AGER/CTNNB1/CCND1/SLCO1B1/ACE2/SCNN1B/PSMB8/VEGFA/TGFB1/MYC/MRC1/PCSK9/VCP/IL13/SLC11A1/TNFAIP3/MMP12/CCR7/CR1/SLC22A5/P…	268	BP
GO:0032268	regulation of cellular protein metabolic process	192/415	2452/17910	1.25547364587754e-59	1.55617983364015e-57	5.92779662000924e-58	XDH/EDN1/HSPB1/CXCR4/IGF1/EP300/SEMA4D/FGFR1/LEP/BRCA1/ELANE/FOXP3/BIRC5/APOE/AIRE/C3/HSPD1/PTK2/BCL2/ALAD/EZR/IL5/AGT/PKHD1/GSTP1/FN1/NFE2L2/BMP6/PPARGC1A/PDGFRB/TNF/EGF/LDLR/SHH/THPO/JAK2/TNFRSF1A/F2/XIAP/WNT5A/PTGS2/BMP7/AGER/CTNNB1/CCND1/NOTCH2/TYMS/VEGFA/TGFB1/MYC/PCSK9/VCP/IL13/SLC11A1/TNFAIP3/FOXO1/GCLC/IGFBP5/CCR7/CR1/PTPRC/HMGCR/ANXA2/EIF2AK2/INS/MMP8/IL10/MAPK1/MMP14/PLAT/MDM2/EGFR/IKBK…	192	BP
GO:0051094	positive regulation of developmental process	146/415	1378/17910	1.90901323149957e-59	2.32869312445622e-57	8.87045245914836e-58	EDN1/HSPB1/CXCR4/MPL/IGF1/EP300/SOD2/SEMA4D/FGFR1/LEP/BRCA1/COL1A1/FOXP3/GNAS/APOE/C3/BCL2/EZR/IL5/AGT/RARB/TCF4/FN1/NFE2L2/BMP6/PPARGC1A/SNAI1/PDGFRB/TNF/EGF/IL1A/ITGB1/SHH/THPO/JAK2/TNFRSF1A/WNT5A/PTGS2/BMP7/AGER/CTNNB1/CCND1/VEGFA/TGFB1/MYC/IL13/TNFAIP3/STAT1/PTPRC/HMGCR/CCL11/HMOX1/INS/SMAD2/TUBB2B/IL10/MAPK1/MMP14/CREB1/PDGFA/IL4/BBS4/BMP1/TERT/SRC/TP53/LPL/NFKB1/SIRT1/IL1B/IGFBP3/HAMP/TLR2/…	146	BP
GO:0048731	system development	264/415	4670/17910	2.33418226697965e-59	2.80284230027166e-57	1.06765804020895e-57	MMP2/XDH/EDN1/HSPB1/CXCR4/MPL/IGF1/EP300/SOD2/SEMA4D/FGFR1/MET/UGT1A1/LEP/BRCA1/COL1A1/DGUOK/FOXP3/GNAS/APOE/AIRE/C3/HSPD1/PTK2/BCL2/ASS1/EDNRA/CYP1A1/ACTC1/EZR/IL5/AGT/PKHD1/RARB/GSTP1/TCF4/FN1/NFE2L2/GAA/ATP7B/BMP6/PPARGC1A/SNAI1/PDGFRB/TNF/EGF/IL1A/CREBBP/ITGB1/LDLR/KRT8/SHH/THPO/JAK2/TNFRSF1A/SPP1/SFTPD/F2/WNT5A/PTGS2/BMP7/B2M/AGER/CTNNB1/CCND1/NOTCH2/ESR1/TYMS/PSMB8/VEGFA/TGFB1/MYC/PCSK9/NKX…	264	BP
GO:0009636	response to toxic substance	94/415	499/17910	5.86524596669779e-59	6.93452542370346e-57	2.64149781917191e-57	EDN1/SOD2/MET/UGT1A1/LEP/COL1A1/APOE/BCL2/GUCY2C/ASS1/ALAD/CYP1A1/ACTC1/GSTP1/NFE2L2/HP/PPARGC1A/PDGFRB/TNF/ABCC2/PTGS2/BMP7/CCND1/TYMS/IL13/TNFAIP3/FOXO1/STAT1/CD14/HMGCR/EIF2AK2/HMOX1/BGLAP/GSTM1/IL10/MAPK1/MDM2/SOD1/CREB1/SRC/HBB/CCL5/CDKN1A/CAT/CPOX/CLDN1/NFKB1/SIRT1/ALB/HAMP/TLR2/HGF/PTEN/EZH2/CD36/CASP8/RHOA/GSN/MPO/PDGFB/PCNA/CSF3/CHUK/STAT3/ARG1/CYP2E1/S100A8/ADA/IL6/CASP3/PPARA/LYN/RBP4/…	94	BP
GO:0043067	regulation of programmed cell death	153/415	1539/17910	6.40523842463983e-59	7.45822080202381e-57	2.84098374145508e-57	XDH/EDN1/HSPB1/CXCR4/IGF1/SOD2/SEMA4D/FGFR1/MET/LEP/BRCA1/BIRC5/HSPD1/PTK2/BCL2/ACTC1/AGT/PKHD1/RARB/GSTP1/NFE2L2/PPARGC1A/SNAI1/PDGFRB/TNF/IL1A/CREBBP/ITGB1/SHH/JAK2/TNFRSF1A/XIAP/WNT5A/PTGS2/BMP7/CTNNB1/NOTCH2/ESR1/VEGFA/TGFB1/MYC/PCSK9/VCP/IL13/TNFAIP3/FOXO1/STAT1/GCLC/CCR7/PTPRC/HMGCR/EIF2AK2/HMOX1/INS/IL10/MDM2/EGFR/IKBKB/SOD1/APOH/CREB1/LGALS3/IL4/MAPK8/TERT/SRC/CXCL10/CCL5/TP53/CDKN1A/CAT/…	153	BP
GO:0051234	establishment of localization	270/415	4908/17910	7.01427040822912e-59	8.0454728488419e-57	3.06467965519013e-57	ABCA3/XDH/EDN1/ABCB7/HSPB1/CXCR4/IGF1/NOS2/FGFR1/LEP/ELANE/COL1A1/FOXP3/GNAS/APOE/C3/PTK2/BCL2/TF/GCK/ALAD/EDNRA/TFR2/IRF3/EZR/IL5/AGT/HPS4/CRP/HSPA8/GSTP1/FN1/NFE2L2/GAA/HP/ATP7B/BMP6/PPARGC1A/PDGFRB/TNF/EGF/IL1A/ITGB1/LDLR/ABCC2/SHH/JAK2/TNFRSF1A/SPP1/SFTPD/F2/WNT5A/PTGS2/B2M/AGER/CTNNB1/CCND1/SLCO1B1/ACE2/SCNN1B/PSMB8/VEGFA/TGFB1/MYC/MRC1/PCSK9/VCP/IL13/SLC11A1/TNFAIP3/MMP12/CCR7/CR1/SLC22A5/P…	270	BP
GO:0012501	programmed cell death	175/415	2049/17910	8.60793689151871e-59	9.72823456048843e-57	3.70567685685968e-57	XDH/EDN1/HSPB1/CXCR4/IGF1/EP300/SOD2/SEMA4D/FGFR1/MET/LEP/BRCA1/BIRC5/HSPD1/PTK2/BCL2/IRF3/ACTC1/AGT/PKHD1/RARB/GSTP1/NFE2L2/PPARGC1A/SNAI1/PDGFRB/TNF/IL1A/CREBBP/ITGB1/KRT8/SHH/JAK2/TNFRSF1A/XIAP/WNT5A/PTGS2/BMP7/CTNNB1/NOTCH2/ESR1/VEGFA/TGFB1/MYC/PCSK9/VCP/IL13/TNFAIP3/FOXO1/STAT1/GCLC/CCR7/PTPRC/CD14/HMGCR/EIF2AK2/HMOX1/INS/BRCA2/IL10/MAPK1/MDM2/EGFR/IKBKB/SOD1/APOH/CREB1/LGALS3/IL4/MAPK8/TERT…	175	BP
GO:0010562	positive regulation of phosphorus metabolic process	127/415	1025/17910	1.05968530125018e-58	1.16338307715824e-56	4.43155612447633e-57	XDH/EDN1/CXCR4/IGF1/SEMA4D/FGFR1/LEP/ELANE/APOE/C3/PTK2/BCL2/GPD1/IL5/AGT/BMP6/PPARGC1A/PDGFRB/TNF/EGF/THPO/JAK2/TNFRSF1A/F2/WNT5A/PTGS2/BMP7/AGER/CTNNB1/CCND1/NOTCH2/VEGFA/TGFB1/VCP/IL13/SLC11A1/CCR7/PTPRC/HMGCR/EIF2AK2/INS/MMP8/MAPK1/EGFR/SOD1/PDGFA/IL4/SRC/CCL5/TP53/CDKN1A/SIRT1/IL1B/IGFBP3/NOD2/HAVCR2/AGTR2/EPO/HGF/HMGB1/TGFB2/PTEN/AXIN1/PKD1/NOS1/PKD2/PTPN11/SMAD3/IFNA2/EZH2/FAS/CSF1/CD36/CD…	127	BP
GO:0045937	positive regulation of phosphate metabolic process	127/415	1025/17910	1.05968530125018e-58	1.16338307715824e-56	4.43155612447633e-57	XDH/EDN1/CXCR4/IGF1/SEMA4D/FGFR1/LEP/ELANE/APOE/C3/PTK2/BCL2/GPD1/IL5/AGT/BMP6/PPARGC1A/PDGFRB/TNF/EGF/THPO/JAK2/TNFRSF1A/F2/WNT5A/PTGS2/BMP7/AGER/CTNNB1/CCND1/NOTCH2/VEGFA/TGFB1/VCP/IL13/SLC11A1/CCR7/PTPRC/HMGCR/EIF2AK2/INS/MMP8/MAPK1/EGFR/SOD1/PDGFA/IL4/SRC/CCL5/TP53/CDKN1A/SIRT1/IL1B/IGFBP3/NOD2/HAVCR2/AGTR2/EPO/HGF/HMGB1/TGFB2/PTEN/AXIN1/PKD1/NOS1/PKD2/PTPN11/SMAD3/IFNA2/EZH2/FAS/CSF1/CD36/CD…	127	BP
GO:0042981	regulation of apoptotic process	151/415	1512/17910	2.69065686581452e-58	2.91235183292741e-56	1.10937238603857e-56	XDH/EDN1/HSPB1/IGF1/SOD2/SEMA4D/FGFR1/LEP/BRCA1/BIRC5/HSPD1/PTK2/BCL2/ACTC1/AGT/PKHD1/RARB/GSTP1/NFE2L2/PPARGC1A/SNAI1/PDGFRB/TNF/IL1A/CREBBP/ITGB1/SHH/JAK2/TNFRSF1A/XIAP/WNT5A/PTGS2/BMP7/CTNNB1/NOTCH2/ESR1/VEGFA/TGFB1/MYC/PCSK9/VCP/IL13/TNFAIP3/FOXO1/STAT1/GCLC/CCR7/PTPRC/HMGCR/EIF2AK2/HMOX1/INS/IL10/MDM2/EGFR/IKBKB/SOD1/APOH/CREB1/LGALS3/IL4/MAPK8/TERT/SRC/CXCL10/CCL5/TP53/CDKN1A/CAT/NFKB1/SIRT…	151	BP
GO:0042327	positive regulation of phosphorylation	122/415	955/17910	1.11767811126075e-57	1.19296615069984e-55	4.54424389973119e-56	XDH/EDN1/CXCR4/IGF1/SEMA4D/FGFR1/LEP/ELANE/APOE/C3/PTK2/BCL2/GPD1/IL5/AGT/BMP6/PDGFRB/TNF/EGF/THPO/JAK2/TNFRSF1A/F2/WNT5A/PTGS2/BMP7/AGER/CTNNB1/CCND1/NOTCH2/VEGFA/TGFB1/VCP/IL13/SLC11A1/CCR7/PTPRC/HMGCR/EIF2AK2/INS/MMP8/MAPK1/EGFR/SOD1/PDGFA/IL4/SRC/CCL5/TP53/CDKN1A/SIRT1/IL1B/IGFBP3/NOD2/HAVCR2/EPO/HGF/HMGB1/TGFB2/PTEN/AXIN1/PKD1/NOS1/PKD2/PTPN11/IFNA2/EZH2/FAS/CSF1/CD36/CDH2/KRAS/RHOA/CALCA/MT…	122	BP
GO:0009966	regulation of signal transduction	218/415	3265/17910	2.08619296520029e-57	2.19621821062524e-55	8.3658293240404e-56	XDH/EDN1/HSPB1/CXCR4/IGF1/EP300/SOD2/SEMA4D/FGFR1/MET/LEP/BRCA1/ELANE/COL1A1/FOXP3/APOE/C3/PTK2/BCL2/IRF3/EZR/IL5/AGT/PKHD1/GSTP1/FN1/NFE2L2/BMP6/PPARGC1A/SNAI1/PDGFRB/TNF/EGF/IL1A/CREBBP/ITGB1/SHH/THPO/JAK2/TNFRSF1A/SPP1/F2/XIAP/WNT5A/PTGS2/BMP7/AGER/CTNNB1/NOTCH2/ESR1/PSMB8/VEGFA/TGFB1/MYC/PCSK9/NKX2-1/VCP/IL13/TNFAIP3/FOXO1/STAT1/GCLC/IGFBP5/MMP12/CCR7/PTPRC/CD14/HMGCR/EIF2AK2/CCL11/HMOX1/INS/…	218	BP
GO:0006955	immune response	177/415	2148/17910	3.14314799242254e-57	3.26420166510368e-55	1.24339894266388e-55	EDN1/EP300/NOS2/SEMA4D/LEP/ELANE/COL1A1/FOXP3/APOE/AIRE/C3/HSPD1/PTK2/BCL2/ASS1/ALAD/IRF3/EZR/IL5/HSPA8/GSTP1/GAA/HP/BMP6/TNF/IL1A/CREBBP/ITGB1/JAK2/SFTPD/F2/XIAP/WNT5A/B2M/AGER/NOTCH2/ESR1/PSMB8/TGFB1/MRC1/VCP/IL13/SLC11A1/TNFAIP3/STAT1/MMP12/CCR7/CR1/PTPRC/CD14/ANXA2/EIF2AK2/HMOX1/INS/CXCR1/MMP8/IL10/MAPK1/IKBKB/TLR7/LGALS3/IL4/MAPK8/SRC/HBB/CCL5/TP53/CAT/IDH1/CLDN1/NFKB1/SIRT1/IL1B/NFKBIA/HAMP…	177	BP
GO:1901698	response to nitrogen compound	124/415	1006/17910	6.40545297816276e-57	6.56345415162411e-55	2.50014943610816e-55	MMP2/EDN1/CXCR4/IGF1/LEP/BRCA1/COL1A1/APOE/PTK2/GPD1/GCK/ASS1/ALAD/IRF3/EZR/AGT/GSTP1/NFE2L2/PPARGC1A/TNF/ITGB1/LDLR/ABCC2/JAK2/PTGS2/BMP7/AGER/CTNNB1/CCND1/TYMS/TGFB1/PCSK9/VCP/TNFAIP3/FOXO1/STAT1/GCLC/IGFBP5/MMP12/CCR7/INS/BGLAP/MMP3/GSTM1/IL10/MAPK1/MDM2/EGFR/SOD1/CREB1/SRC/TP53/CDKN1A/LPL/CAT/HADHA/NFKB1/SIRT1/IL1B/REN/AGXT/NFKBIA/SREBF1/NOD2/TLR2/NME1/AGTR2/COL1A2/PTEN/NLRP3/PKD2/MTHFR/PTPN1…	124	BP
GO:0051704	multi-organism process	190/415	2496/17910	7.3718328234426e-57	7.45428095370479e-55	2.83948297534541e-55	MMP2/EDN1/HSPB1/CXCR4/IGF1/EP300/MMP7/NOS2/MET/UGT1A1/LEP/ELANE/FOXP3/APOE/C3/HSPD1/BCL2/ASS1/ALAD/CYP1A1/IRF3/AGT/CRP/HSPA8/GSTP1/FN1/NFE2L2/HP/BMP6/PPARGC1A/TNF/CREBBP/ITGB1/LDLR/ABCC2/KRT8/JAK2/TNFRSF1A/SPP1/SFTPD/F2/WNT5A/PTGS2/B2M/CTNNB1/ESR1/ACE2/TYMS/PSMB8/TGFB1/MRC1/VCP/IL13/SLC11A1/TNFAIP3/MMP1/STAT1/IGFBP5/MMP12/CCR7/CR1/SLC22A5/PTPRC/CD14/ANXA2/GGT1/EIF2AK2/CCL11/SLC10A1/BRCA2/IL10/MAP…	190	BP
GO:0051050	positive regulation of transport	120/415	942/17910	1.64513031166494e-56	1.6419255123565e-54	6.25441886088884e-55	EDN1/IGF1/FGFR1/LEP/APOE/C3/BCL2/TF/GCK/TFR2/IRF3/EZR/IL5/AGT/HPS4/NFE2L2/BMP6/PDGFRB/TNF/EGF/IL1A/SHH/JAK2/SPP1/SFTPD/F2/WNT5A/PTGS2/B2M/AGER/ACE2/VEGFA/TGFB1/PCSK9/IL13/SLC11A1/MMP12/PTPRC/CD14/ANXA2/INS/MMP8/IL10/MAPK1/MDM2/EGFR/SOD1/CREB1/LGALS3/IL4/MAPK8/TERT/SRC/CXCL10/CCL5/TP53/LPL/SIRT1/IL1B/NFKBIA/NOD2/TLR2/HAVCR2/AGTR2/TWIST1/HMGB1/TGFB2/NLRP3/NOS1/PKD2/PTPN11/SMAD3/CD36/CASP8/CDH2/PPAR…	120	BP
GO:0001934	positive regulation of protein phosphorylation	118/415	907/17910	1.70556834968611e-56	1.68042214965869e-54	6.40106016258715e-55	XDH/EDN1/CXCR4/IGF1/SEMA4D/FGFR1/LEP/ELANE/APOE/C3/PTK2/BCL2/IL5/AGT/BMP6/PDGFRB/TNF/EGF/THPO/JAK2/TNFRSF1A/F2/WNT5A/PTGS2/BMP7/AGER/CTNNB1/CCND1/NOTCH2/VEGFA/TGFB1/IL13/SLC11A1/CCR7/PTPRC/HMGCR/EIF2AK2/INS/MMP8/MAPK1/EGFR/SOD1/PDGFA/IL4/SRC/CCL5/TP53/CDKN1A/SIRT1/IL1B/IGFBP3/NOD2/HAVCR2/EPO/HGF/HMGB1/TGFB2/PTEN/AXIN1/PKD1/NOS1/PKD2/PTPN11/IFNA2/EZH2/FAS/CSF1/CD36/CDH2/KRAS/RHOA/CALCA/MTOR/MAPK14…	118	BP
GO:0009617	response to bacterium	98/415	588/17910	2.15118871980391e-56	2.0926437103409e-54	7.9712935773147e-55	EDN1/NOS2/UGT1A1/ELANE/C3/ASS1/ALAD/CYP1A1/CRP/GSTP1/HP/BMP6/PPARGC1A/TNF/ABCC2/JAK2/TNFRSF1A/SFTPD/F2/WNT5A/PTGS2/B2M/TGFB1/MRC1/IL13/SLC11A1/TNFAIP3/CCR7/CD14/IL10/MAPK1/CXCL2/MAPK8/SRC/CXCL10/CCL5/LPL/CLDN1/NFKB1/IL1B/REN/NFKBIA/HAMP/NOD2/TLR2/HAVCR2/EPO/HMGB1/NLRP3/CD36/LBP/CASP8/RHOA/CXCL8/SELE/THBD/MAPK14/MPO/VIM/CSF3/CHUK/ARG1/SLPI/CYP2E1/CAMP/SCARB1/S100A8/CCL2/IL6/CASP3/CYP1A2/LYN/PYGL/R…	98	BP
GO:0035556	intracellular signal transduction	194/415	2624/17910	2.67761870491704e-56	2.57218746841093e-54	9.79797055049248e-55	XDH/EDN1/HSPB1/CXCR4/IGF1/EP300/SOD2/SEMA4D/FGFR1/MET/LEP/BRCA1/ELANE/GNAS/APOE/PTK2/BCL2/GUCY2C/IRF3/EZR/IL5/AGT/PKHD1/GSTP1/FN1/NFE2L2/SNAI1/PDGFRB/TNF/EGF/ITGB1/SHH/THPO/JAK2/TNFRSF1A/F2/XIAP/WNT5A/PTGS2/BMP7/AGER/CTNNB1/NOTCH2/ESR1/PSMB8/VEGFA/TGFB1/MYC/IL13/TNFAIP3/FOXO1/STAT1/IGFBP5/CCR7/PTPRC/CD14/HMGCR/EIF2AK2/CCL11/HMOX1/INS/SMAD2/BRCA2/MMP8/IL10/MAPK1/MDM2/EGFR/IKBKB/SOD1/TLR7/PDGFA/IL4…	194	BP
GO:1902531	regulation of intracellular signal transduction	163/415	1838/17910	2.74062757574936e-56	2.60021270612763e-54	9.90472422112927e-55	XDH/EDN1/HSPB1/CXCR4/IGF1/EP300/SOD2/SEMA4D/FGFR1/MET/LEP/BRCA1/ELANE/APOE/PTK2/BCL2/IRF3/EZR/IL5/AGT/PKHD1/GSTP1/FN1/NFE2L2/SNAI1/PDGFRB/TNF/EGF/ITGB1/THPO/JAK2/TNFRSF1A/F2/XIAP/WNT5A/PTGS2/BMP7/AGER/CTNNB1/NOTCH2/ESR1/VEGFA/TGFB1/MYC/IL13/TNFAIP3/FOXO1/STAT1/IGFBP5/CCR7/PTPRC/CD14/HMGCR/EIF2AK2/HMOX1/INS/MMP8/IL10/MAPK1/MDM2/EGFR/IKBKB/SOD1/TLR7/PDGFA/IL4/SCT/SRC/CCL5/TP53/CAT/SIRT1/IL1B/REN/NF…	163	BP
GO:0044093	positive regulation of molecular function	154/415	1636/17910	3.94894202617484e-56	3.70092920379923e-54	1.40975709560876e-54	XDH/EDN1/CXCR4/IGF1/EP300/SEMA4D/FGFR1/MET/LEP/ELANE/GNAS/APOE/HSPD1/PTK2/BCL2/EDNRA/IL5/AGT/FN1/PPARGC1A/PDGFRB/TNF/EGF/ITGB1/SHH/JAK2/F2/WNT5A/B2M/AGER/CTNNB1/CCND1/ESR1/VEGFA/TGFB1/MYC/VCP/SLC11A1/CCR7/CR1/PTPRC/ANXA2/EIF2AK2/CCL11/INS/MMP8/IL10/MAPK1/EGFR/IKBKB/SOD1/APOH/LGALS3/PDGFA/IL4/MAPK8/TERT/SRC/CCL5/CDKN1A/CAT/NFKB1/SIRT1/IL1B/SREBF1/NOD2/TLR2/NME1/AGTR2/TWIST1/EPO/HGF/HMGB1/TGFB2/PTE…	154	BP
GO:0010243	response to organonitrogen compound	119/415	932/17910	4.14556177014958e-56	3.8383906269397e-54	1.46211886909144e-54	MMP2/EDN1/CXCR4/IGF1/LEP/BRCA1/COL1A1/APOE/PTK2/GPD1/GCK/ASS1/ALAD/EZR/AGT/GSTP1/NFE2L2/PPARGC1A/TNF/ITGB1/LDLR/ABCC2/JAK2/PTGS2/BMP7/AGER/CTNNB1/CCND1/TYMS/TGFB1/PCSK9/VCP/TNFAIP3/FOXO1/STAT1/GCLC/IGFBP5/MMP12/INS/BGLAP/MMP3/IL10/MAPK1/MDM2/EGFR/SOD1/CREB1/SRC/TP53/CDKN1A/LPL/CAT/HADHA/NFKB1/SIRT1/IL1B/REN/AGXT/NFKBIA/SREBF1/NOD2/TLR2/NME1/AGTR2/COL1A2/PTEN/NLRP3/PKD2/MTHFR/PTPN11/EZH2/CD36/TSC2…	119	BP
GO:0042325	regulation of phosphorylation	146/415	1467/17910	6.85870344394088e-56	6.27489713889115e-54	2.39023236561398e-54	XDH/EDN1/HSPB1/CXCR4/IGF1/SEMA4D/FGFR1/LEP/ELANE/APOE/C3/PTK2/BCL2/GPD1/GCK/EZR/IL5/AGT/PKHD1/GSTP1/FN1/BMP6/PPARGC1A/PDGFRB/TNF/EGF/THPO/JAK2/TNFRSF1A/F2/WNT5A/PTGS2/BMP7/AGER/CTNNB1/CCND1/NOTCH2/VEGFA/TGFB1/MYC/VCP/IL13/SLC11A1/TNFAIP3/FOXO1/CCR7/PTPRC/HMGCR/EIF2AK2/INS/MMP8/MAPK1/EGFR/IKBKB/SOD1/TLR7/PDGFA/IL4/SRC/CXCL10/CCL5/TP53/CDKN1A/SIRT1/IL1B/REN/IGFBP3/NOD2/HAVCR2/TWIST1/EPO/HGF/HMGB1/T…	146	BP
GO:0001932	regulation of protein phosphorylation	139/415	1324/17910	9.98578217517975e-56	9.02832188426546e-54	3.43906628225076e-54	XDH/EDN1/HSPB1/CXCR4/IGF1/SEMA4D/FGFR1/LEP/ELANE/APOE/C3/PTK2/BCL2/EZR/IL5/AGT/PKHD1/GSTP1/FN1/BMP6/PPARGC1A/PDGFRB/TNF/EGF/THPO/JAK2/TNFRSF1A/F2/WNT5A/PTGS2/BMP7/AGER/CTNNB1/CCND1/NOTCH2/VEGFA/TGFB1/MYC/IL13/SLC11A1/TNFAIP3/FOXO1/CCR7/PTPRC/HMGCR/EIF2AK2/INS/MMP8/MAPK1/EGFR/SOD1/TLR7/PDGFA/IL4/SRC/CXCL10/CCL5/TP53/CDKN1A/SIRT1/IL1B/REN/IGFBP3/NOD2/HAVCR2/TWIST1/EPO/HGF/HMGB1/TGFB2/PTEN/AXIN1/PKD…	139	BP
GO:0019220	regulation of phosphate metabolic process	155/415	1671/17910	1.0989818998861e-55	9.8205533728194e-54	3.74084291748255e-54	XDH/EDN1/HSPB1/CXCR4/IGF1/SEMA4D/FGFR1/LEP/ELANE/APOE/C3/PTK2/BCL2/GPD1/GCK/EZR/IL5/AGT/PKHD1/GSTP1/FN1/BMP6/PPARGC1A/PDGFRB/TNF/EGF/LDLR/THPO/JAK2/TNFRSF1A/F2/WNT5A/PTGS2/BMP7/AGER/CTNNB1/CCND1/NOTCH2/VEGFA/TGFB1/MYC/VCP/IL13/SLC11A1/TNFAIP3/FOXO1/CCR7/PTPRC/HMGCR/EIF2AK2/INS/MMP8/MAPK1/EGFR/IKBKB/SOD1/TLR7/LGALS3/PDGFA/IL4/SRC/CXCL10/CCL5/TP53/CDKN1A/IDH1/SIRT1/IL1B/REN/IGFBP3/NOD2/HAVCR2/AGTR2…	155	BP
GO:0051174	regulation of phosphorus metabolic process	155/415	1673/17910	1.2928938985723e-55	1.1420562770722e-53	4.35031812695653e-54	XDH/EDN1/HSPB1/CXCR4/IGF1/SEMA4D/FGFR1/LEP/ELANE/APOE/C3/PTK2/BCL2/GPD1/GCK/EZR/IL5/AGT/PKHD1/GSTP1/FN1/BMP6/PPARGC1A/PDGFRB/TNF/EGF/LDLR/THPO/JAK2/TNFRSF1A/F2/WNT5A/PTGS2/BMP7/AGER/CTNNB1/CCND1/NOTCH2/VEGFA/TGFB1/MYC/VCP/IL13/SLC11A1/TNFAIP3/FOXO1/CCR7/PTPRC/HMGCR/EIF2AK2/INS/MMP8/MAPK1/EGFR/IKBKB/SOD1/TLR7/LGALS3/PDGFA/IL4/SRC/CXCL10/CCL5/TP53/CDKN1A/IDH1/SIRT1/IL1B/REN/IGFBP3/NOD2/HAVCR2/AGTR2…	155	BP
GO:0009628	response to abiotic stimulus	132/415	1191/17910	2.19523265185145e-55	1.91708669653164e-53	7.30256220669724e-54	EDN1/CXCR4/MPL/IGF1/EP300/MMP7/NOS2/LEP/BRCA1/ELANE/COL1A1/HSPD1/BCL2/ALAD/EDNRA/CYP1A1/AGT/HSPA8/NFE2L2/BMP6/PPARGC1A/PDGFRB/TNF/IL1A/CREBBP/ITGB1/ABCC2/KRT8/TNFRSF1A/PTGS2/BMP7/AGER/CCND1/PSMB8/VEGFA/TGFB1/MYC/VCP/IL13/FOXO1/STAT1/GCLC/PTPRC/CD14/HMGCR/CCL11/HMOX1/BGLAP/BRCA2/MAPK1/MMP14/PLAT/MDM2/EGFR/SOD1/CREB1/TLR7/MAPK8/TERT/SRC/CXCL10/FECH/TP53/CDKN1A/LPL/CAT/CLDN1/NFKB1/SIRT1/IL1B/ALAS2/N…	132	BP
GO:0060548	negative regulation of cell death	122/415	1003/17910	2.89460847180098e-55	2.4994456298641e-53	9.52088250748493e-54	EDN1/HSPB1/IGF1/SOD2/SEMA4D/MET/LEP/BRCA1/BIRC5/APOE/HSPD1/PTK2/BCL2/ACTC1/PKHD1/RARB/GSTP1/NFE2L2/PPARGC1A/SNAI1/PDGFRB/TNF/IL1A/ITGB1/SHH/JAK2/XIAP/WNT5A/PTGS2/BMP7/CTNNB1/NOTCH2/VEGFA/MYC/IL13/TNFAIP3/FOXO1/GCLC/CCR7/HMGCR/EIF2AK2/HMOX1/INS/IL10/MDM2/EGFR/IKBKB/SOD1/APOH/CREB1/LGALS3/IL4/MAPK8/TERT/SRC/CCL5/TP53/CDKN1A/CAT/NFKB1/SIRT1/IL1B/NFKBIA/ALB/NOD2/TWIST1/EPO/HGF/PTEN/SMAD3/FAS/CSF1/SLC…	122	BP
GO:0031401	positive regulation of protein modification process	128/415	1117/17910	3.28143106587799e-55	2.80197752680804e-53	1.06732863090137e-53	XDH/EDN1/CXCR4/IGF1/SEMA4D/FGFR1/LEP/BRCA1/ELANE/FOXP3/APOE/C3/PTK2/BCL2/IL5/AGT/BMP6/PPARGC1A/PDGFRB/TNF/EGF/THPO/JAK2/TNFRSF1A/F2/XIAP/WNT5A/PTGS2/BMP7/AGER/CTNNB1/CCND1/NOTCH2/VEGFA/TGFB1/VCP/IL13/SLC11A1/CCR7/PTPRC/HMGCR/EIF2AK2/INS/MMP8/MAPK1/EGFR/SOD1/PDGFA/IL4/SRC/CCL5/TP53/CDKN1A/SIRT1/IL1B/IGFBP3/SREBF1/NOD2/HAVCR2/AGTR2/EPO/HGF/HMGB1/TGFB2/PTEN/AXIN1/PKD1/NOS1/PKD2/PTPN11/IFNA2/EZH2/FAS…	128	BP
GO:0001816	cytokine production	108/415	765/17910	5.83682021280587e-55	4.92922674015529e-53	1.87763990882743e-53	HSPB1/IGF1/EP300/NOS2/FGFR1/LEP/BRCA1/ELANE/FOXP3/AIRE/C3/HSPD1/IRF3/EZR/AGT/CRP/GSTP1/FN1/TNF/IL1A/CREBBP/JAK2/SFTPD/F2/WNT5A/PTGS2/B2M/AGER/CTNNB1/ACE2/TGFB1/IL13/SLC11A1/TNFAIP3/STAT1/MMP12/CCR7/PTPRC/CD14/EIF2AK2/HMOX1/INS/MMP8/IL10/SOD1/CREB1/TLR7/IL4/SRC/LPL/NFKB1/SIRT1/IL1B/NOD2/TLR2/HAVCR2/AGTR2/TWIST1/HGF/HMGB1/IL12RB1/TGFB2/IRF1/NLRP3/PTPN11/SMAD3/IFNA2/CD36/LBP/IL17A/MAPK14/SMAD7/ATG5/…	108	BP
GO:0031399	regulation of protein modification process	156/415	1718/17910	7.65717820541491e-55	6.396240707458e-53	2.43645452966349e-53	XDH/EDN1/HSPB1/CXCR4/IGF1/EP300/SEMA4D/FGFR1/LEP/BRCA1/ELANE/FOXP3/APOE/C3/PTK2/BCL2/EZR/IL5/AGT/PKHD1/GSTP1/FN1/BMP6/PPARGC1A/PDGFRB/TNF/EGF/THPO/JAK2/TNFRSF1A/F2/XIAP/WNT5A/PTGS2/BMP7/AGER/CTNNB1/CCND1/NOTCH2/VEGFA/TGFB1/MYC/VCP/IL13/SLC11A1/TNFAIP3/FOXO1/GCLC/CCR7/PTPRC/HMGCR/EIF2AK2/INS/MMP8/MAPK1/EGFR/IKBKB/SOD1/TLR7/LGALS3/PDGFA/IL4/MAPK8/SRC/CXCL10/CCL5/TP53/CDKN1A/SIRT1/IL1B/REN/IGFBP3/SR…	156	BP
GO:0002684	positive regulation of immune system process	126/415	1087/17910	7.84287981251254e-55	6.48091735044719e-53	2.46870953690972e-53	EDN1/MPL/IGF1/EP300/LEP/ELANE/FOXP3/GNAS/C3/HSPD1/PTK2/BCL2/IRF3/EZR/IL5/TNF/CREBBP/SHH/THPO/SFTPD/F2/XIAP/WNT5A/B2M/AGER/ESR1/PSMB8/VEGFA/TGFB1/IL13/SLC11A1/TNFAIP3/STAT1/MMP12/CCR7/CR1/PTPRC/CD14/HMOX1/MMP8/IL10/MAPK1/MMP14/IKBKB/CREB1/TLR7/LGALS3/IL4/SRC/CXCL10/CCL5/CDKN1A/NFKB1/SIRT1/IL1B/NFKBIA/NOD2/TLR2/HAVCR2/EPO/HMGB1/IL12RB1/TGFB2/IRF1/NLRP3/PTPN11/CSF1/CD36/LBP/CXCR2/CASP8/KRAS/RHOA/CXC…	126	BP
GO:0045321	leukocyte activation	131/415	1186/17910	9.62557850015612e-55	7.86942242273402e-53	2.99761856762981e-53	EDN1/MPL/IGF1/EP300/LEP/ELANE/FOXP3/C3/HSPD1/BCL2/ALAD/IL5/HSPA8/GSTP1/GAA/HP/TNF/ITGB1/LDLR/SHH/SFTPD/WNT5A/B2M/AGER/CTNNB1/NOTCH2/TGFB1/VCP/IL13/SLC11A1/TNFAIP3/CCR7/CR1/PTPRC/CD14/ANXA2/HMOX1/INS/CXCR1/MMP8/IL10/MAPK1/MMP14/SOD1/TLR7/LGALS3/IL4/SRC/HBB/CCL5/TP53/CDKN1A/CAT/IDH1/NFKB1/IL1B/NOD2/TLR2/HAVCR2/EPO/HMGB1/DNASE1/IL12RB1/PLAU/DSP/IRF1/ALOX5/NLRP3/PTPN11/SMAD3/IFNA2/CSF1/CD36/LBP/CXCR2…	131	BP
GO:0048878	chemical homeostasis	122/415	1015/17910	1.10309968692223e-54	8.92349588841822e-53	3.39913598817807e-53	EDN1/SOD2/MET/LEP/ELANE/APOE/BCL2/TF/GCK/EDNRA/TFR2/AGT/PKHD1/GSTP1/ATP7B/BMP6/PPARGC1A/LDLR/ABCC2/JAK2/SFTPD/F2/XIAP/WNT5A/B2M/AGER/ESR1/SCNN1B/VEGFA/TGFB1/MYC/PCSK9/IL13/SLC11A1/FOXO1/STAT1/GCLC/IGFBP5/CCR7/PTPRC/HMGCR/ANXA2/CCL11/HMOX1/INS/MAPK1/EGFR/SOD1/SCT/GPR35/CETP/SRC/CXCL10/CCL5/UMOD/LPL/CLDN1/SIRT1/ALAS2/HAMP/SCNN1G/NME1/AGTR2/EPO/HMGB1/PKD1/TGM2/NOS1/PKD2/PTPN11/SMAD3/APOC3/SLC40A1/CD…	122	BP
GO:0005102	signaling receptor binding	145/412	1386/16967	8.39097111394046e-56	9.11259462973934e-53	5.76768856568749e-53	EDN1/IGF1/EP300/NOS2/SEMA4D/FGFR1/BRCA1/APOE/C3/TF/IL5/AGT/CRP/HSPA8/RARB/FN1/BMP6/PPARGC1A/PDGFRB/TNF/EGF/IL1A/SHH/THPO/JAK2/SPP1/F2/WNT5A/BMP7/CTNNB1/ESR1/VEGFA/TGFB1/PCSK9/VCP/IL13/STAT1/PTPRC/CCL11/INS/SMAD2/IL10/MMP14/PLAT/MDM2/EGFR/LGALS3/PDGFA/IL4/SCT/BMP1/SRC/GFER/CXCL10/PLG/CCL5/TP53/LPL/CAT/IDH1/SIRT1/IL1B/REN/AGXT/HAMP/TLR2/AGTR2/EPO/HGF/TYMP/HMGB1/IL12RB1/TGFB2/PTEN/RXRA/PKD2/PTPN11/S…	145	MF
GO:0009891	positive regulation of biosynthetic process	161/415	1842/17910	1.36326069825515e-54	1.09131859021779e-52	4.15704824763988e-53	EDN1/HSPB1/IGF1/EP300/FGFR1/MET/BRCA1/ELANE/COL1A1/FOXP3/APOE/AIRE/GPD1/GCK/ASS1/TFR2/IRF3/IL5/AGT/TCF4/NFE2L2/NR1I3/BMP6/PPARGC1A/SNAI1/PDGFRB/TNF/EGF/IL1A/CREBBP/LDLR/SHH/JAK2/TNFRSF1A/SPP1/F2/WNT5A/PTGS2/BMP7/AGER/CTNNB1/ESR1/VEGFA/TGFB1/MYC/NKX2-1/VCP/SLC11A1/FOXO1/STAT1/MMP12/CCR7/PTPRC/HMOX1/INS/SMAD2/BRCA2/MMP8/IL10/MAPK1/EGFR/IKBKB/CREB1/TLR7/IL4/TERT/SRC/HBB/CXCL10/CCL5/TP53/NFKB1/SIRT1/…	161	BP
GO:0010035	response to inorganic substance	92/415	528/17910	1.55930018212539e-54	1.23538370099316e-52	4.70582073411906e-53	EDN1/SOD2/MET/COL1A1/BCL2/TF/ASS1/ALAD/TFR2/CYP1A1/NFE2L2/HP/ATP7B/BMP6/PPARGC1A/PDGFRB/TNF/IL1A/ABCC2/KRT8/SHH/WNT5A/PTGS2/BMP7/B2M/CCND1/VCP/TNFAIP3/FOXO1/STAT1/GCLC/CCR7/CD14/HMOX1/BGLAP/MMP3/IL10/MAPK1/MDM2/EGFR/SOD1/CREB1/MAPK8/TERT/SRC/HBB/CAT/CPOX/CLDN1/SIRT1/HAMP/HGF/PTEN/PKD2/EZH2/SLC40A1/TNFRSF11B/CD36/CASP8/SLC25A13/GSN/MPO/CALR/PCNA/CHUK/ARG1/CYP2E1/S100A8/ADA/IL6/CASP3/PRKAA2/SLC11A2…	92	BP
GO:0001817	regulation of cytokine production	103/415	698/17910	3.83884142478981e-54	3.01035677035813e-52	1.1467044041182e-52	HSPB1/IGF1/EP300/NOS2/FGFR1/LEP/BRCA1/ELANE/FOXP3/C3/HSPD1/IRF3/EZR/AGT/CRP/GSTP1/FN1/TNF/IL1A/CREBBP/JAK2/SFTPD/F2/WNT5A/PTGS2/B2M/AGER/CTNNB1/ACE2/TGFB1/IL13/SLC11A1/TNFAIP3/STAT1/MMP12/CCR7/PTPRC/CD14/EIF2AK2/HMOX1/INS/MMP8/IL10/SOD1/CREB1/TLR7/IL4/SRC/LPL/NFKB1/IL1B/NOD2/TLR2/HAVCR2/AGTR2/TWIST1/HGF/HMGB1/IL12RB1/TGFB2/IRF1/NLRP3/PTPN11/SMAD3/IFNA2/CD36/LBP/IL17A/MAPK14/SMAD7/ATG5/CHUK/STAT3/…	103	BP
GO:0031328	positive regulation of cellular biosynthetic process	159/415	1809/17910	3.99120355558522e-54	3.09822215400732e-52	1.1801740657185e-52	EDN1/HSPB1/IGF1/EP300/FGFR1/MET/BRCA1/ELANE/COL1A1/FOXP3/APOE/AIRE/GPD1/GCK/ASS1/TFR2/IRF3/IL5/AGT/TCF4/NFE2L2/NR1I3/BMP6/PPARGC1A/SNAI1/PDGFRB/TNF/EGF/IL1A/CREBBP/LDLR/SHH/JAK2/TNFRSF1A/SPP1/WNT5A/PTGS2/BMP7/AGER/CTNNB1/ESR1/VEGFA/TGFB1/MYC/NKX2-1/VCP/SLC11A1/FOXO1/STAT1/MMP12/CCR7/PTPRC/HMOX1/INS/SMAD2/BRCA2/MMP8/IL10/MAPK1/EGFR/IKBKB/CREB1/TLR7/IL4/TERT/SRC/HBB/CXCL10/CCL5/TP53/NFKB1/SIRT1/IL1…	159	BP
GO:0071396	cellular response to lipid	94/415	575/17910	3.295025736568e-53	2.53222727855251e-51	9.64575428778486e-52	EDN1/EP300/NOS2/UGT1A1/LEP/BRCA1/COL1A1/ASS1/RARB/GSTP1/NR1I3/BMP6/PPARGC1A/TNF/LDLR/ABCC2/JAK2/SPP1/WNT5A/BMP7/CTNNB1/ESR1/TGFB1/MRC1/TNFAIP3/FOXO1/CD14/BGLAP/IL10/MAPK1/EGFR/CREB1/MAPK8/SRC/CXCL10/CCL5/LPL/CLDN1/NFKB1/SIRT1/IL1B/NFKBIA/CPT1A/HAMP/SREBF1/NOD2/TLR2/HAVCR2/NME1/AGTR2/HMGB1/AXIN1/NLRP3/RXRA/CD36/LBP/PPARG/RHOA/CXCL8/NR3C1/MAPK14/VIM/CALR/CSF3/NR1H2/ARG1/SCARB1/CCL2/IL6/VDR/PRKAA2/P…	94	BP
GO:0044421	extracellular region part	210/415	3312/18675	9.01886372073459e-54	5.708940735225e-51	3.23729739870578e-51	ABCA3/MMP2/XDH/EDN1/HSPB1/CXCR4/IGF1/MMP7/SOD2/SEMA4D/LEP/ELANE/COL1A1/GNAS/APOE/ALDH2/C3/HSPD1/GPD1/TF/ASS1/ALAD/ACTC1/EZR/IL5/AGT/PKHD1/CRP/HSPA8/GSTP1/FN1/GAA/HP/TNF/EGF/IL1A/ITGB1/LDLR/KRT8/SHH/THPO/TNFRSF1A/SPP1/F2/WNT5A/BMP7/B2M/CTNNB1/ACE2/SCNN1B/PSMB8/VEGFA/TGFB1/PCSK9/VCP/IL13/TNFAIP3/GPT/MMP1/IGFBP5/MMP12/CR1/SLC22A5/PTPRC/CD14/ANXA2/FH/GGT1/HMOX1/INS/BGLAP/MMP3/ASL/MMP8/GSTM1/IL10/MMP1…	210	CC
GO:0016477	cell migration	141/415	1474/17910	1.41155001526737e-51	1.07403582844849e-49	4.09121479151491e-50	EDN1/HSPB1/CXCR4/IGF1/SOD2/SEMA4D/FGFR1/MET/LEP/ELANE/COL1A1/APOE/AIRE/PTK2/BCL2/AGT/GSTP1/FN1/NFE2L2/PPARGC1A/SNAI1/PDGFRB/TNF/EGF/ITGB1/SHH/JAK2/SFTPD/F2/WNT5A/PTGS2/BMP7/AGER/CTNNB1/VEGFA/TGFB1/NKX2-1/MMP1/IGFBP5/MMP12/CCR7/PTPRC/CCL11/HMOX1/INS/TUBB2B/CXCR1/IL10/MAPK1/MMP14/MDM2/EGFR/APOH/LGALS3/PDGFA/IL4/BBS4/TERT/SRC/CXCL10/CCL5/UMOD/SIRT1/ABCC1/IL1B/IGFBP3/AGTR2/TWIST1/COL1A2/HGF/HMGB1/TGF…	141	BP
GO:0048523	negative regulation of cellular process	250/415	4580/17910	1.80463111377188e-51	1.35966569699381e-49	5.17923542559297e-50	XDH/EDN1/HSPB1/IGF1/EP300/SOD2/SEMA4D/FGFR1/MET/LEP/BRCA1/CYP2D6/ELANE/COL1A1/DGUOK/FOXP3/BIRC5/APOE/C3/HSPD1/PTK2/BCL2/GCK/ASS1/ALAD/ACTC1/EZR/AGT/PKHD1/CRP/HSPA8/RARB/GSTP1/FN1/NFE2L2/NR1I3/HP/BMP6/PPARGC1A/SNAI1/PDGFRB/TNF/EGF/IL1A/CREBBP/ITGB1/LDLR/SHH/JAK2/TNFRSF1A/SPP1/SFTPD/F2/XIAP/WNT5A/PTGS2/BMP7/B2M/AGER/CTNNB1/CCND1/NOTCH2/ESR1/TYMS/PSMB8/VEGFA/TGFB1/MYC/PCSK9/NKX2-1/IL13/SLC11A1/TNFAI…	250	BP
GO:0005615	extracellular space	199/415	3051/18675	4.49591931415199e-52	1.4229584629291e-49	8.0689920322412e-50	ABCA3/MMP2/XDH/EDN1/HSPB1/CXCR4/IGF1/MMP7/SOD2/SEMA4D/LEP/ELANE/COL1A1/GNAS/APOE/ALDH2/C3/HSPD1/GPD1/TF/ASS1/ALAD/ACTC1/EZR/IL5/AGT/PKHD1/CRP/HSPA8/GSTP1/FN1/GAA/HP/TNF/EGF/IL1A/ITGB1/LDLR/KRT8/SHH/THPO/TNFRSF1A/SPP1/F2/WNT5A/BMP7/B2M/CTNNB1/ACE2/SCNN1B/PSMB8/VEGFA/TGFB1/PCSK9/VCP/IL13/TNFAIP3/GPT/IGFBP5/MMP12/CR1/SLC22A5/PTPRC/CD14/ANXA2/FH/GGT1/HMOX1/INS/BGLAP/ASL/MMP8/IL10/MMP14/PLAT/EGFR/SOD1…	199	CC
GO:0005576	extracellular region	237/415	4295/18675	9.44008365795641e-52	1.9918576518288e-49	1.12949772889935e-49	ABCA3/MMP2/XDH/EDN1/HSPB1/CXCR4/IGF1/MMP7/SOD2/SEMA4D/FGFR1/MET/LEP/ELANE/COL1A1/GNAS/APOE/ALDH2/C3/HSPD1/GPD1/TF/ASS1/ALAD/ACTC1/EZR/IL5/AGT/PKHD1/CRP/HSPA8/GSTP1/FN1/GAA/HP/TNF/EGF/IL1A/ITGB1/LDLR/KRT8/SHH/THPO/TNFRSF1A/SPP1/SFTPD/F2/WNT5A/BMP7/B2M/AGER/CTNNB1/NOTCH2/ACE2/SCNN1B/PSMB8/VEGFA/TGFB1/PCSK9/VCP/IL13/TNFAIP3/GPT/MMP1/IGFBP5/MMP12/CR1/SLC22A5/PTPRC/CD14/ANXA2/FH/GGT1/CCL11/HMOX1/INS/B…	237	CC
GO:0072359	circulatory system development	124/415	1128/17910	2.77119000112331e-51	2.0676305979255e-49	7.8760136874031e-50	MMP2/XDH/EDN1/HSPB1/CXCR4/IGF1/EP300/SOD2/FGFR1/LEP/BRCA1/COL1A1/APOE/C3/PTK2/EDNRA/ACTC1/AGT/RARB/FN1/NFE2L2/GAA/SNAI1/PDGFRB/EGF/IL1A/ITGB1/LDLR/SHH/TNFRSF1A/WNT5A/PTGS2/BMP7/CTNNB1/NOTCH2/VEGFA/TGFB1/TNFAIP3/FOXO1/STAT1/ANXA2/CCL11/HMOX1/SMAD2/IL10/MAPK1/MMP14/MDM2/EGFR/APOH/CREB1/PDGFA/BBS4/TERT/CXCL10/TP53/CDKN1A/SIRT1/IL1B/HAMP/AGTR2/TWIST1/COL1A2/HGF/TYMP/TGFB2/PTEN/DSP/PKD1/RXRA/PKD2/PTPN…	124	BP
GO:0030335	positive regulation of cell migration	88/415	516/17910	2.93980683592912e-51	2.17234764751109e-49	8.27490163028227e-50	EDN1/HSPB1/CXCR4/IGF1/SOD2/SEMA4D/FGFR1/MET/ELANE/COL1A1/PTK2/BCL2/AGT/FN1/NFE2L2/SNAI1/PDGFRB/TNF/EGF/ITGB1/JAK2/WNT5A/PTGS2/BMP7/AGER/VEGFA/TGFB1/IGFBP5/CCR7/PTPRC/CCL11/HMOX1/INS/MAPK1/MMP14/MDM2/EGFR/LGALS3/PDGFA/TERT/SRC/CXCL10/CCL5/SIRT1/IL1B/HGF/HMGB1/TGFB2/PLAU/SMAD3/CSF1/LBP/CXCR2/RHOA/CXCL8/MTOR/MAPK14/PDGFB/CALR/STAT3/NOX4/VTN/SCARB1/IL6/LYN/FGF7/SP1/IFNG/HSPA5/FGF2/CXCL12/ICAM1/CAV1/M…	88	BP
GO:0030334	regulation of cell migration	112/415	906/17910	4.34718155517364e-51	3.18172288109613e-49	1.21198114335217e-49	EDN1/HSPB1/CXCR4/IGF1/SOD2/SEMA4D/FGFR1/MET/ELANE/COL1A1/APOE/AIRE/PTK2/BCL2/AGT/GSTP1/FN1/NFE2L2/PPARGC1A/SNAI1/PDGFRB/TNF/EGF/ITGB1/SHH/JAK2/WNT5A/PTGS2/BMP7/AGER/VEGFA/TGFB1/NKX2-1/IGFBP5/CCR7/PTPRC/CCL11/HMOX1/INS/MAPK1/MMP14/MDM2/EGFR/APOH/LGALS3/PDGFA/IL4/TERT/SRC/CXCL10/CCL5/SIRT1/IL1B/IGFBP3/AGTR2/HGF/HMGB1/TGFB2/PLAU/PTEN/SMAD3/CSF1/LBP/CXCR2/PPARG/RHOA/CXCL8/MTOR/MAPK14/SMAD7/PDGFB/CALR…	112	BP
GO:0051241	negative regulation of multicellular organismal process	131/415	1276/17910	5.20869969527759e-51	3.77630727907625e-49	1.43847009459454e-49	XDH/EDN1/IGF1/SEMA4D/FGFR1/LEP/ELANE/DGUOK/FOXP3/APOE/PTK2/BCL2/IRF3/EZR/AGT/RARB/GSTP1/FN1/NFE2L2/SNAI1/TNF/LDLR/SHH/JAK2/TNFRSF1A/SPP1/SFTPD/F2/WNT5A/PTGS2/BMP7/B2M/AGER/CTNNB1/TGFB1/MYC/PCSK9/NKX2-1/IL13/SLC11A1/TNFAIP3/FOXO1/STAT1/IGFBP5/PTPRC/HMGCR/HMOX1/INS/BRCA2/MMP8/IL10/PLAT/MDM2/EGFR/SOD1/APOH/PDGFA/IL4/GPR35/TERT/CXCL10/PLG/TP53/NFKB1/IL1B/NFKBIA/HAMP/TLR2/HAVCR2/NME1/AGTR2/TWIST1/HGF/…	131	BP
GO:2000145	regulation of cell motility	115/415	966/17910	7.76317281081954e-51	5.5756993505746e-49	2.12389410594089e-49	EDN1/HSPB1/CXCR4/IGF1/SOD2/SEMA4D/FGFR1/MET/ELANE/COL1A1/APOE/AIRE/PTK2/BCL2/AGT/GSTP1/FN1/NFE2L2/PPARGC1A/SNAI1/PDGFRB/TNF/EGF/ITGB1/SHH/JAK2/WNT5A/PTGS2/BMP7/AGER/VEGFA/TGFB1/NKX2-1/IGFBP5/CCR7/PTPRC/CCL11/HMOX1/INS/MAPK1/MMP14/MDM2/EGFR/APOH/LGALS3/PDGFA/IL4/BBS4/TERT/SRC/CXCL10/CCL5/SIRT1/IL1B/IGFBP3/AGTR2/TWIST1/HGF/HMGB1/TGFB2/PLAU/PTEN/SMAD3/CSF1/LBP/CXCR2/PPARG/RHOA/CXCL8/MTOR/MAPK14/RAF1…	115	BP
GO:0008284	positive regulation of cell proliferation	113/415	931/17910	9.43523412610226e-51	6.71386798695332e-49	2.55744503944351e-49	MMP2/EDN1/MPL/IGF1/FGFR1/LEP/ELANE/FOXP3/BIRC5/PTK2/BCL2/IL5/AGT/PKHD1/FN1/BMP6/PPARGC1A/PDGFRB/TNF/EGF/ITGB1/SHH/THPO/JAK2/F2/WNT5A/PTGS2/AGER/CTNNB1/CCND1/NOTCH2/ESR1/VEGFA/TGFB1/MYC/IL13/TNFAIP3/STAT1/IGFBP5/MMP12/PTPRC/HMGCR/CCL11/HMOX1/INS/IL10/MAPK1/MDM2/EGFR/PDGFA/IL4/TERT/CXCL10/CCL5/CDKN1A/SIRT1/IL1B/NOD2/HAVCR2/NME1/AGTR2/TWIST1/EPO/HMGB1/IL12RB1/TGFB2/PTEN/TGM2/EZH2/CSF1/CXCR2/KRAS/MTO…	113	BP
GO:0043069	negative regulation of programmed cell death	112/415	916/17910	1.3499697469998e-50	9.51790596852611e-49	3.6255585382969e-49	EDN1/HSPB1/IGF1/SOD2/SEMA4D/MET/LEP/BRCA1/BIRC5/HSPD1/PTK2/BCL2/ACTC1/PKHD1/RARB/GSTP1/NFE2L2/PPARGC1A/SNAI1/PDGFRB/TNF/IL1A/ITGB1/SHH/JAK2/XIAP/WNT5A/PTGS2/BMP7/CTNNB1/NOTCH2/VEGFA/MYC/IL13/TNFAIP3/FOXO1/GCLC/CCR7/HMGCR/EIF2AK2/HMOX1/INS/IL10/MDM2/EGFR/IKBKB/SOD1/APOH/LGALS3/IL4/MAPK8/TERT/SRC/CCL5/TP53/CDKN1A/CAT/NFKB1/SIRT1/IL1B/NFKBIA/ALB/NOD2/TWIST1/EPO/HGF/PTEN/SMAD3/FAS/SLC40A1/CXCR2/CASP8…	112	BP
GO:2000147	positive regulation of cell motility	89/415	540/17910	1.44424020807727e-50	1.00899872718853e-48	3.84347561594534e-49	EDN1/HSPB1/CXCR4/IGF1/SOD2/SEMA4D/FGFR1/MET/ELANE/COL1A1/PTK2/BCL2/AGT/FN1/NFE2L2/SNAI1/PDGFRB/TNF/EGF/ITGB1/JAK2/WNT5A/PTGS2/BMP7/AGER/VEGFA/TGFB1/IGFBP5/CCR7/PTPRC/CCL11/HMOX1/INS/MAPK1/MMP14/MDM2/EGFR/LGALS3/PDGFA/TERT/SRC/CXCL10/CCL5/SIRT1/IL1B/TWIST1/HGF/HMGB1/TGFB2/PLAU/SMAD3/CSF1/LBP/CXCR2/RHOA/CXCL8/MTOR/MAPK14/PDGFB/CALR/STAT3/NOX4/VTN/SCARB1/IL6/LYN/FGF7/SP1/IFNG/HSPA5/FGF2/CXCL12/ICAM1…	89	BP
GO:0051272	positive regulation of cellular component movement	90/415	555/17910	1.54069215827502e-50	1.06668641768861e-48	4.06321943306101e-49	EDN1/HSPB1/CXCR4/IGF1/SOD2/SEMA4D/FGFR1/MET/ELANE/COL1A1/PTK2/BCL2/AGT/FN1/NFE2L2/SNAI1/PDGFRB/TNF/EGF/ITGB1/JAK2/WNT5A/PTGS2/BMP7/AGER/VEGFA/TGFB1/IGFBP5/CCR7/PTPRC/CCL11/HMOX1/INS/TUBB2B/MAPK1/MMP14/MDM2/EGFR/LGALS3/PDGFA/TERT/SRC/CXCL10/CCL5/SIRT1/IL1B/TWIST1/HGF/HMGB1/TGFB2/PLAU/SMAD3/CSF1/LBP/CXCR2/RHOA/CXCL8/MTOR/MAPK14/PDGFB/CALR/STAT3/NOX4/VTN/SCARB1/IL6/LYN/FGF7/SP1/IFNG/HSPA5/FGF2/CXCL1…	90	BP
GO:0009991	response to extracellular stimulus	86/415	498/17910	1.63940246707346e-50	1.12489356780889e-48	4.28494197455949e-49	MMP7/UGT1A1/LEP/COL1A1/APOE/BCL2/ASS1/ALAD/CYP1A1/HSPA8/GSTP1/NFE2L2/PPARGC1A/LDLR/SPP1/PTGS2/BMP7/CBS/CCND1/TYMS/TGFB1/PCSK9/FOXO1/STAT1/GCLC/PTPRC/HMGCR/EIF2AK2/HMOX1/BGLAP/MAPK1/MDM2/EGFR/SOD1/CREB1/BBS4/SCT/MAPK8/SRC/CXCL10/TP53/CDKN1A/LPL/CAT/SIRT1/IL1B/ALB/HAMP/SREBF1/NOD2/EPO/PTEN/MTHFR/FAS/TNFRSF11B/PPARG/MTOR/GSN/MPO/PCNA/ARG1/ADRB2/ADA/VDR/PRKAA2/PPARA/LYN/DDIT3/FOS/HSPA5/GLUL/ICAM1/MAP…	86	BP
GO:0045595	regulation of cell differentiation	154/415	1808/17910	2.48383246954055e-50	1.68922588747072e-48	6.43459534028158e-49	XDH/EDN1/CXCR4/MPL/IGF1/EP300/SOD2/SEMA4D/FGFR1/LEP/COL1A1/DGUOK/FOXP3/GNAS/APOE/PTK2/BCL2/IL5/AGT/CRP/RARB/TCF4/FN1/NFE2L2/BMP6/SNAI1/TNF/CREBBP/ITGB1/LDLR/SHH/THPO/JAK2/TNFRSF1A/SPP1/F2/WNT5A/PTGS2/BMP7/B2M/AGER/CTNNB1/CCND1/NOTCH2/PSMB8/VEGFA/TGFB1/MYC/NKX2-1/IL13/FOXO1/STAT1/IGFBP5/CR1/PTPRC/EIF2AK2/INS/SMAD2/BGLAP/TUBB2B/MAPK1/MMP14/MDM2/EGFR/IKBKB/SOD1/CREB1/LGALS3/IL4/TERT/CETP/CXCL10/TP53…	154	BP
GO:0006468	protein phosphorylation	155/415	1835/17910	3.10690035770808e-50	2.09443239026198e-48	7.97810701272962e-49	XDH/EDN1/HSPB1/CXCR4/IGF1/SEMA4D/FGFR1/MET/LEP/ELANE/DGUOK/BIRC5/APOE/C3/PTK2/BCL2/GUCY2C/EZR/IL5/AGT/PKHD1/GSTP1/FN1/BMP6/PPARGC1A/PDGFRB/TNF/EGF/THPO/JAK2/TNFRSF1A/F2/WNT5A/PTGS2/BMP7/AGER/CTNNB1/CCND1/NOTCH2/PSMB8/VEGFA/TGFB1/MYC/IL13/SLC11A1/TNFAIP3/FOXO1/CCR7/PTPRC/HMGCR/EIF2AK2/CCL11/INS/SMAD2/MMP8/MAPK1/EGFR/IKBKB/SOD1/CREB1/TLR7/PDGFA/IL4/MAPK8/SRC/CXCL10/CCL5/TP53/CDKN1A/NFKB1/SIRT1/IL1B…	155	BP
GO:0043066	negative regulation of apoptotic process	110/415	894/17910	6.69514658845583e-50	4.47410448106809e-48	1.70427484324903e-48	EDN1/HSPB1/IGF1/SOD2/SEMA4D/LEP/BRCA1/BIRC5/HSPD1/PTK2/BCL2/ACTC1/PKHD1/RARB/GSTP1/NFE2L2/PPARGC1A/SNAI1/PDGFRB/TNF/IL1A/ITGB1/SHH/JAK2/XIAP/WNT5A/PTGS2/BMP7/CTNNB1/NOTCH2/VEGFA/MYC/IL13/TNFAIP3/FOXO1/GCLC/CCR7/HMGCR/EIF2AK2/HMOX1/INS/IL10/MDM2/EGFR/IKBKB/SOD1/APOH/LGALS3/IL4/MAPK8/TERT/SRC/CCL5/TP53/CDKN1A/CAT/NFKB1/SIRT1/IL1B/NFKBIA/ALB/NOD2/TWIST1/EPO/HGF/PTEN/SMAD3/FAS/SLC40A1/CXCR2/CASP8/KRA…	110	BP
GO:0051270	regulation of cellular component movement	118/415	1046/17910	9.11786226812936e-50	6.0405837526357e-48	2.30097776476114e-48	EDN1/HSPB1/CXCR4/IGF1/SOD2/SEMA4D/FGFR1/MET/ELANE/COL1A1/APOE/AIRE/PTK2/BCL2/AGT/PKHD1/GSTP1/FN1/NFE2L2/PPARGC1A/SNAI1/PDGFRB/TNF/EGF/ITGB1/SHH/JAK2/WNT5A/PTGS2/BMP7/AGER/VEGFA/TGFB1/NKX2-1/IGFBP5/CCR7/PTPRC/CCL11/HMOX1/INS/TUBB2B/MAPK1/MMP14/MDM2/EGFR/APOH/LGALS3/PDGFA/IL4/BBS4/TERT/SRC/CXCL10/CCL5/SIRT1/IL1B/IGFBP3/AGTR2/TWIST1/HGF/HMGB1/TGFB2/PLAU/PTEN/DSP/SMAD3/CSF1/LBP/CXCR2/PPARG/RHOA/CXCL8…	118	BP
GO:0009725	response to hormone	111/415	919/17910	1.44167944857272e-49	9.46949278827469e-48	3.60711700088236e-48	ABCA3/EDN1/EP300/UGT1A1/LEP/BRCA1/COL1A1/PTK2/BCL2/GCK/ASS1/ALAD/AGT/RARB/GSTP1/NFE2L2/NR1I3/BMP6/PPARGC1A/PDGFRB/TNF/ABCC2/JAK2/SPP1/PTGS2/BMP7/CTNNB1/CCND1/ESR1/TYMS/TGFB1/PCSK9/NKX2-1/FOXO1/STAT1/GCLC/IGFBP5/CCR7/ANXA2/INS/BGLAP/IL10/MMP14/MDM2/EGFR/CREB1/BBS4/SRC/CDKN1A/LPL/CAT/HADHA/IDH1/CLDN1/NFKB1/SIRT1/IL1B/REN/AGXT/SREBF1/TLR2/NME1/AGTR2/EPO/TGFB2/PTEN/AXIN1/RXRA/PTPN11/EZH2/CASP8/TSC2/K…	111	BP
GO:0040017	positive regulation of locomotion	90/415	570/17910	1.58802882365159e-49	1.03423741608156e-47	3.9396147712534e-48	EDN1/HSPB1/CXCR4/IGF1/SOD2/SEMA4D/FGFR1/MET/ELANE/COL1A1/PTK2/BCL2/AGT/FN1/NFE2L2/SNAI1/PDGFRB/TNF/EGF/ITGB1/JAK2/WNT5A/PTGS2/BMP7/AGER/VEGFA/TGFB1/IGFBP5/CCR7/PTPRC/CCL11/HMOX1/INS/TUBB2B/MAPK1/MMP14/MDM2/EGFR/LGALS3/PDGFA/TERT/SRC/CXCL10/CCL5/SIRT1/IL1B/TWIST1/HGF/HMGB1/TGFB2/PLAU/SMAD3/CSF1/LBP/CXCR2/RHOA/CXCL8/MTOR/MAPK14/PDGFB/CALR/STAT3/NOX4/VTN/SCARB1/IL6/LYN/FGF7/SP1/IFNG/HSPA5/FGF2/CXCL1…	90	BP
GO:0050776	regulation of immune response	117/415	1033/17910	1.71966935237857e-49	1.11055957756549e-47	4.2303409721051e-48	EP300/LEP/ELANE/COL1A1/FOXP3/APOE/C3/HSPD1/PTK2/BCL2/IRF3/EZR/TNF/CREBBP/ITGB1/JAK2/SFTPD/F2/XIAP/WNT5A/B2M/AGER/ESR1/PSMB8/TGFB1/IL13/SLC11A1/TNFAIP3/STAT1/MMP12/CCR7/CR1/PTPRC/CD14/HMOX1/INS/IL10/MAPK1/IKBKB/TLR7/LGALS3/IL4/MAPK8/SRC/CCL5/NFKB1/SIRT1/IL1B/NFKBIA/NOD2/HLA-C/TLR2/HAVCR2/COL1A2/HMGB1/IL12RB1/TGFB2/IRF1/NLRP3/PTPN11/SMAD3/IFNA2/CD36/LBP/CASP8/KRAS/PPARG/MAPK14/RAF1/SMAD7/ATG5/HLA-A…	117	BP
GO:0035295	tube development	120/415	1093/17910	2.06503565294851e-49	1.32248324940911e-47	5.03760013232438e-48	MMP2/XDH/EDN1/HSPB1/CXCR4/EP300/FGFR1/MET/LEP/BRCA1/APOE/C3/PTK2/BCL2/ASS1/EDNRA/CYP1A1/AGT/RARB/FN1/NFE2L2/PDGFRB/TNF/EGF/IL1A/ITGB1/LDLR/SHH/SFTPD/WNT5A/PTGS2/BMP7/CTNNB1/ESR1/TYMS/VEGFA/TGFB1/MYC/NKX2-1/IL13/TNFAIP3/STAT1/IGFBP5/ANXA2/CCL11/HMOX1/SMAD2/IL10/MAPK1/MMP14/EGFR/APOH/CREB1/PDGFA/BBS4/SCT/TERT/SRC/CXCL10/UMOD/CDKN1A/CAT/SIRT1/IL1B/SREBF1/AGTR2/TWIST1/HGF/TYMP/TGFB2/PTEN/PKD1/TGM2/PK…	120	BP
GO:0010628	positive regulation of gene expression	153/415	1827/17910	5.46392989949471e-49	3.4702728328609e-47	1.32189552418397e-47	EDN1/IGF1/EP300/MET/BRCA1/COL1A1/FOXP3/APOE/AIRE/C3/TFR2/IRF3/ACTC1/EZR/IL5/AGT/CRP/HSPA8/TCF4/FN1/NFE2L2/NR1I3/BMP6/PPARGC1A/SNAI1/TNF/EGF/IL1A/CREBBP/LDLR/SHH/TNFRSF1A/SPP1/WNT5A/BMP7/CTNNB1/ESR1/VEGFA/TGFB1/MYC/NKX2-1/IL13/SLC11A1/FOXO1/STAT1/MMP12/INS/SMAD2/BRCA2/MMP8/IL10/MAPK1/MMP14/MDM2/EGFR/IKBKB/CREB1/IL4/MAPK8/TERT/SRC/CXCL10/CCL5/TP53/NFKB1/SIRT1/IL1B/NFKBIA/SREBF1/NOD2/TLR2/AGTR2/TWIS…	153	BP
GO:0048585	negative regulation of response to stimulus	144/415	1620/17910	7.69249370916673e-49	4.8456405045038e-47	1.84580025929186e-47	XDH/EDN1/HSPB1/IGF1/SOD2/MET/LEP/BRCA1/ELANE/FOXP3/APOE/BCL2/EZR/AGT/PKHD1/GSTP1/NFE2L2/SNAI1/TNF/EGF/IL1A/ITGB1/LDLR/SHH/TNFRSF1A/SPP1/F2/WNT5A/PTGS2/BMP7/AGER/CTNNB1/ESR1/PSMB8/TGFB1/MYC/NKX2-1/TNFAIP3/FOXO1/STAT1/GCLC/IGFBP5/MMP12/CR1/PTPRC/CD14/HMGCR/HMOX1/INS/SMAD2/IL10/MMP14/PLAT/MDM2/EGFR/SOD1/APOH/LGALS3/PDGFA/IL4/BBS4/TERT/SRC/PLG/CCL5/TP53/CDKN1A/LPL/NFKB1/SIRT1/IL1B/NFKBIA/IGFBP3/HAVCR…	144	BP
GO:0031667	response to nutrient levels	82/415	466/17910	9.50189526785186e-49	5.93675326288143e-47	2.26142667863894e-47	MMP7/UGT1A1/LEP/COL1A1/APOE/BCL2/ASS1/ALAD/CYP1A1/HSPA8/GSTP1/NFE2L2/PPARGC1A/LDLR/SPP1/PTGS2/BMP7/CCND1/TYMS/TGFB1/PCSK9/FOXO1/STAT1/GCLC/HMGCR/EIF2AK2/HMOX1/BGLAP/MAPK1/MDM2/EGFR/SOD1/CREB1/BBS4/SCT/MAPK8/SRC/CXCL10/TP53/CDKN1A/LPL/CAT/SIRT1/IL1B/ALB/HAMP/SREBF1/NOD2/EPO/PTEN/MTHFR/FAS/TNFRSF11B/PPARG/MTOR/GSN/MPO/PCNA/ARG1/ADRB2/ADA/VDR/PRKAA2/PPARA/DDIT3/HSPA5/GLUL/ICAM1/MAPK3/HSP90B1/RELA/NR…	82	BP
GO:0040012	regulation of locomotion	116/415	1035/17910	1.49281702958601e-48	9.25185392932943e-47	3.52421405711265e-47	EDN1/HSPB1/CXCR4/IGF1/SOD2/SEMA4D/FGFR1/MET/ELANE/COL1A1/APOE/AIRE/PTK2/BCL2/AGT/GSTP1/FN1/NFE2L2/PPARGC1A/SNAI1/PDGFRB/TNF/EGF/ITGB1/SHH/JAK2/WNT5A/PTGS2/BMP7/AGER/VEGFA/TGFB1/NKX2-1/IGFBP5/CCR7/PTPRC/CCL11/HMOX1/INS/TUBB2B/MAPK1/MMP14/MDM2/EGFR/APOH/LGALS3/PDGFA/IL4/BBS4/TERT/SRC/CXCL10/CCL5/SIRT1/IL1B/IGFBP3/AGTR2/TWIST1/HGF/HMGB1/TGFB2/PLAU/PTEN/SMAD3/CSF1/LBP/CXCR2/PPARG/RHOA/CXCL8/MTOR/MAPK…	116	BP
GO:0009888	tissue development	158/415	1964/17910	1.53657635331877e-48	9.44687142020377e-47	3.59850007459325e-47	MMP2/XDH/EDN1/CXCR4/IGF1/EP300/FGFR1/MET/LEP/COL1A1/GNAS/AIRE/BCL2/EDNRA/CYP1A1/ACTC1/EZR/AGT/RARB/FN1/GAA/BMP6/PPARGC1A/SNAI1/PDGFRB/TNF/EGF/ITGB1/KRT8/SHH/JAK2/TNFRSF1A/SPP1/WNT5A/PTGS2/BMP7/CTNNB1/CCND1/ESR1/TYMS/PSMB8/VEGFA/TGFB1/MYC/NKX2-1/IL13/FOXO1/STAT1/IGFBP5/MMP12/PTPRC/HMGCR/CCL11/EXOC4/SMAD2/BGLAP/BRCA2/MMP8/IL10/MAPK1/MMP14/MDM2/EGFR/IKBKB/SOD1/CREB1/LGALS3/PDGFA/BBS4/BMP1/SRC/CXCL10…	158	BP
GO:0050790	regulation of catalytic activity	164/415	2116/17910	1.65317897474718e-48	1.00830796991524e-46	3.84084438493893e-47	XDH/EDN1/HSPB1/CXCR4/IGF1/SEMA4D/FGFR1/UGT1A1/LEP/ELANE/BIRC5/GNAS/APOE/C3/HSPD1/PTK2/BCL2/EDNRA/AGT/GSTP1/FN1/HP/PDGFRB/TNF/EGF/ITGB1/JAK2/F2/XIAP/WNT5A/PTGS2/BMP7/AGER/CTNNB1/CCND1/ESR1/PSMB8/VEGFA/TGFB1/MYC/VCP/IL13/SLC11A1/TNFAIP3/CCR7/CR1/PTPRC/HMGCR/ANXA2/EIF2AK2/CCL11/INS/MAPK1/MDM2/EGFR/IKBKB/SOD1/APOH/LGALS3/PDGFA/IL4/BBS4/MAPK8/TERT/SRC/CXCL10/CCL5/TP53/CDKN1A/LPL/NFKB1/SIRT1/IL1B/IGFBP…	164	BP
GO:0030154	cell differentiation	226/415	3923/17910	1.794107806891e-48	1.08564712566593e-46	4.13544451799741e-47	MMP2/XDH/EDN1/CXCR4/MPL/IGF1/EP300/SOD2/SEMA4D/FGFR1/MET/LEP/COL1A1/DGUOK/FOXP3/GNAS/APOE/C3/PTK2/BCL2/EDNRA/CYP1A1/ACTC1/EZR/IL5/AGT/HPS4/CRP/RARB/GSTP1/TCF4/FN1/NFE2L2/BMP6/PPARGC1A/SNAI1/PDGFRB/TNF/IL1A/CREBBP/ITGB1/LDLR/KRT8/SHH/THPO/JAK2/TNFRSF1A/SPP1/F2/WNT5A/PTGS2/BMP7/B2M/AGER/CTNNB1/CCND1/NOTCH2/ESR1/TYMS/PSMB8/VEGFA/TGFB1/MYC/PCSK9/NKX2-1/IL13/FOXO1/STAT1/IGFBP5/CCR7/CR1/PTPRC/HMGCR/ANX…	226	BP
GO:0009611	response to wounding	95/415	665/17910	1.9259403244832e-48	1.15631651512917e-46	4.40463819275312e-47	EDN1/HSPB1/CXCR4/MPL/IGF1/COL1A1/GNAS/APOE/BCL2/CYP1A1/HPS4/FN1/NFE2L2/PDGFRB/IL1A/SHH/JAK2/SPP1/F2/WNT5A/AGER/TGFB1/SLC11A1/TNFAIP3/MMP12/HMGCR/HMOX1/INS/SMAD2/IL10/MAPK1/PLAT/EGFR/SOD1/APOH/PDGFA/SRC/HBB/PLG/CDKN1A/EPO/COL1A2/TGFB2/PLAU/PTEN/IRF1/PTPN11/SMAD3/IFNA2/EZH2/CD36/RHOA/SERPINA1/THBD/MTOR/RAF1/GSN/PDGFB/ARG1/VTN/SCARB1/S100A8/IL6/ANXA5/CASP3/CD34/COL3A1/PECAM1/PPARA/LYN/TGFB3/PIK3CG/F…	95	BP
GO:0048870	cell motility	143/415	1611/17910	2.23450804928131e-48	1.32093802759437e-46	5.03171407696463e-47	EDN1/HSPB1/CXCR4/IGF1/SOD2/SEMA4D/FGFR1/MET/LEP/ELANE/COL1A1/APOE/AIRE/PTK2/BCL2/AGT/GSTP1/FN1/NFE2L2/PPARGC1A/SNAI1/PDGFRB/TNF/EGF/ITGB1/SHH/JAK2/SFTPD/F2/WNT5A/PTGS2/BMP7/AGER/CTNNB1/VEGFA/TGFB1/NKX2-1/MMP1/IGFBP5/MMP12/CCR7/PTPRC/CCL11/HMOX1/INS/TUBB2B/CXCR1/IL10/MAPK1/MMP14/MDM2/EGFR/APOH/LGALS3/PDGFA/IL4/BBS4/TERT/SRC/CXCL10/CCL5/UMOD/SIRT1/ABCC1/IL1B/IGFBP3/AGTR2/TWIST1/COL1A2/HGF/HMGB1/TGF…	143	BP
GO:0051674	localization of cell	143/415	1611/17910	2.23450804928131e-48	1.32093802759437e-46	5.03171407696463e-47	EDN1/HSPB1/CXCR4/IGF1/SOD2/SEMA4D/FGFR1/MET/LEP/ELANE/COL1A1/APOE/AIRE/PTK2/BCL2/AGT/GSTP1/FN1/NFE2L2/PPARGC1A/SNAI1/PDGFRB/TNF/EGF/ITGB1/SHH/JAK2/SFTPD/F2/WNT5A/PTGS2/BMP7/AGER/CTNNB1/VEGFA/TGFB1/NKX2-1/MMP1/IGFBP5/MMP12/CCR7/PTPRC/CCL11/HMOX1/INS/TUBB2B/CXCR1/IL10/MAPK1/MMP14/MDM2/EGFR/APOH/LGALS3/PDGFA/IL4/BBS4/TERT/SRC/CXCL10/CCL5/UMOD/SIRT1/ABCC1/IL1B/IGFBP3/AGTR2/TWIST1/COL1A2/HGF/HMGB1/TGF…	143	BP
GO:0040011	locomotion	152/415	1835/17910	5.2812172390018e-48	3.09817973142968e-46	1.18015790612005e-46	EDN1/HSPB1/CXCR4/IGF1/EP300/SOD2/SEMA4D/FGFR1/MET/LEP/ELANE/COL1A1/APOE/AIRE/PTK2/BCL2/EZR/AGT/GSTP1/FN1/NFE2L2/PPARGC1A/SNAI1/PDGFRB/TNF/EGF/ITGB1/SHH/JAK2/SFTPD/F2/WNT5A/PTGS2/BMP7/AGER/CTNNB1/VEGFA/TGFB1/NKX2-1/MMP1/IGFBP5/MMP12/CCR7/PTPRC/CCL11/HMOX1/INS/TUBB2B/CXCR1/IL10/MAPK1/MMP14/MDM2/CXCL2/EGFR/APOH/CREB1/LGALS3/PDGFA/IL4/BBS4/TERT/SRC/CXCL10/CCL5/UMOD/SIRT1/ABCC1/IL1B/IGFBP3/AGTR2/TWIST…	152	BP
GO:0048869	cellular developmental process	230/415	4088/17910	7.96557040657111e-48	4.63753095261356e-46	1.76652721695967e-46	MMP2/XDH/EDN1/CXCR4/MPL/IGF1/EP300/SOD2/SEMA4D/FGFR1/MET/LEP/COL1A1/DGUOK/FOXP3/GNAS/APOE/C3/PTK2/BCL2/EDNRA/CYP1A1/ACTC1/EZR/IL5/AGT/HPS4/CRP/RARB/GSTP1/TCF4/FN1/NFE2L2/BMP6/PPARGC1A/SNAI1/PDGFRB/TNF/IL1A/CREBBP/ITGB1/LDLR/KRT8/SHH/THPO/JAK2/TNFRSF1A/SPP1/F2/WNT5A/PTGS2/BMP7/B2M/AGER/CTNNB1/CCND1/NOTCH2/ESR1/TYMS/PSMB8/VEGFA/TGFB1/MYC/PCSK9/NKX2-1/IL13/FOXO1/STAT1/IGFBP5/CCR7/CR1/PTPRC/HMGCR/ANX…	230	BP
GO:0010557	positive regulation of macromolecule biosynthetic process	146/415	1698/17910	8.14961027439674e-48	4.70900413223601e-46	1.79375276399662e-46	EDN1/HSPB1/IGF1/EP300/FGFR1/MET/BRCA1/ELANE/COL1A1/FOXP3/APOE/AIRE/GCK/TFR2/IRF3/IL5/AGT/TCF4/NFE2L2/NR1I3/BMP6/PPARGC1A/SNAI1/PDGFRB/TNF/EGF/IL1A/CREBBP/SHH/JAK2/TNFRSF1A/SPP1/WNT5A/BMP7/AGER/CTNNB1/ESR1/VEGFA/TGFB1/MYC/NKX2-1/SLC11A1/FOXO1/STAT1/MMP12/CCR7/PTPRC/HMOX1/INS/SMAD2/BRCA2/IL10/MAPK1/EGFR/IKBKB/CREB1/TLR7/IL4/TERT/SRC/CXCL10/CCL5/TP53/NFKB1/SIRT1/IL1B/NFKBIA/SREBF1/NOD2/TLR2/AGTR2/TW…	146	BP
GO:0042802	identical protein binding	149/412	1670/16967	1.45964125686849e-48	7.9258520247959e-46	5.01655653018486e-46	XDH/HSPB1/NOS2/SOD2/FGFR1/MET/UGT1A1/BRCA1/COL1A1/FOXP3/BIRC5/APOE/AIRE/BCL2/GPD1/ASS1/ALAD/IRF3/EZR/HPS4/CRP/TCF4/FN1/TNF/LDLR/JAK2/SFTPD/XIAP/PTGS2/B2M/AGER/CBS/ESR1/TYMS/VEGFA/TGFB1/VCP/SLC11A1/TNFAIP3/STAT1/PTPRC/HMGCR/ANXA2/ABCD3/EIF2AK2/HMOX1/INS/SMAD2/ASL/BRCA2/ACADM/GSTM1/MAPK1/MDM2/EGFR/IKBKB/SOD1/APOH/CREB1/PDGFA/BMP1/TERT/CCL5/TP53/LPL/CAT/CPOX/IDH1/CLDN1/NFKB1/SIRT1/AGXT/NFKBIA/ALB/CP…	149	MF
GO:0071495	cellular response to endogenous stimulus	128/415	1305/17910	1.78632834396173e-47	1.02447263607059e-45	3.90241879383941e-46	MMP2/EDN1/IGF1/EP300/FGFR1/UGT1A1/LEP/BRCA1/COL1A1/PTK2/GPD1/GCK/ASS1/EZR/AGT/RARB/GSTP1/NFE2L2/NR1I3/BMP6/PPARGC1A/PDGFRB/TNF/CREBBP/ABCC2/JAK2/SPP1/XIAP/WNT5A/PTGS2/BMP7/AGER/CTNNB1/ESR1/TGFB1/PCSK9/NKX2-1/FOXO1/STAT1/GCLC/IGFBP5/INS/SMAD2/BGLAP/IL10/MAPK1/MDM2/EGFR/SOD1/CREB1/BBS4/SRC/CCL5/TP53/LPL/CLDN1/NFKB1/SIRT1/IL1B/REN/SREBF1/NOD2/AGTR2/COL1A2/TGFB2/PTEN/AXIN1/NLRP3/RXRA/PKD2/PTPN11/SMAD…	128	BP
GO:0001819	positive regulation of cytokine production	79/415	446/17910	3.85543566046807e-47	2.19474244819979e-45	8.3602078532255e-46	HSPB1/EP300/LEP/BRCA1/ELANE/FOXP3/C3/HSPD1/IRF3/AGT/TNF/IL1A/CREBBP/JAK2/WNT5A/PTGS2/B2M/AGER/CTNNB1/TGFB1/IL13/SLC11A1/STAT1/MMP12/CCR7/PTPRC/CD14/EIF2AK2/HMOX1/INS/MMP8/IL10/SOD1/CREB1/TLR7/IL4/SRC/LPL/NFKB1/IL1B/NOD2/TLR2/HAVCR2/AGTR2/TWIST1/HGF/HMGB1/IL12RB1/IRF1/NLRP3/PTPN11/SMAD3/CD36/LBP/IL17A/MAPK14/CHUK/STAT3/IL6/CD34/CD80/IL2/DDIT3/IFNG/MAPK3/CD81/RELA/HIF1A/TLR4/SERPINE1/TLR9/MIF/LTA/C…	79	BP
GO:0043085	positive regulation of catalytic activity	126/415	1293/17910	2.43440018248959e-46	1.37561510312004e-44	5.23998986648882e-45	XDH/EDN1/CXCR4/IGF1/SEMA4D/FGFR1/LEP/ELANE/GNAS/APOE/HSPD1/PTK2/BCL2/EDNRA/AGT/FN1/PDGFRB/TNF/EGF/ITGB1/JAK2/F2/WNT5A/AGER/CTNNB1/CCND1/ESR1/VEGFA/TGFB1/MYC/VCP/SLC11A1/CCR7/CR1/PTPRC/EIF2AK2/CCL11/INS/MAPK1/EGFR/SOD1/APOH/PDGFA/IL4/MAPK8/TERT/SRC/CCL5/CDKN1A/SIRT1/IL1B/SREBF1/NOD2/AGTR2/EPO/HGF/HMGB1/TGFB2/PTEN/AXIN1/NLRP3/PKD1/PKD2/PTPN11/SMAD3/EZH2/FAS/CSF1/CASP8/TSC2/KRAS/PPARG/RHOA/CALCA/SEL…	126	BP
GO:0009653	anatomical structure morphogenesis	176/415	2535/17910	7.0355236616078e-46	3.9465692948508e-44	1.5033262622306e-44	MMP2/XDH/EDN1/HSPB1/CXCR4/MPL/EP300/SEMA4D/FGFR1/MET/LEP/BRCA1/COL1A1/GNAS/APOE/AIRE/C3/PTK2/BCL2/EDNRA/ACTC1/EZR/AGT/RARB/FN1/NFE2L2/GAA/BMP6/PPARGC1A/SNAI1/PDGFRB/TNF/EGF/IL1A/CREBBP/ITGB1/LDLR/KRT8/SHH/TNFRSF1A/SPP1/F2/WNT5A/PTGS2/BMP7/CTNNB1/NOTCH2/ESR1/PSMB8/VEGFA/TGFB1/MYC/NKX2-1/TNFAIP3/FOXO1/STAT1/IGFBP5/MMP12/ANXA2/CCL11/HMOX1/EXOC4/SMAD2/BGLAP/TUBB2B/MMP8/IL10/MAPK1/MMP14/MDM2/EGFR/SOD1…	176	BP
GO:0071222	cellular response to lipopolysaccharide	54/415	176/17910	1.11932994943534e-45	6.23337004450044e-44	2.37441387443149e-44	NOS2/ASS1/GSTP1/BMP6/PPARGC1A/TNF/ABCC2/WNT5A/TGFB1/MRC1/TNFAIP3/CD14/IL10/MAPK1/MAPK8/SRC/CXCL10/CCL5/NFKB1/IL1B/NFKBIA/HAMP/NOD2/TLR2/HAVCR2/HMGB1/NLRP3/CD36/LBP/RHOA/CXCL8/MAPK14/VIM/CSF3/ARG1/SCARB1/CCL2/IL6/LYN/ICAM1/TNFRSF1B/MAPK3/LTF/RELA/NOS3/TLR4/SERPINE1/AKT1/MIF/LCN2/CEBPB/CCL3/PRKCA/CSF2	54	BP
GO:0071216	cellular response to biotic stimulus	57/415	206/17910	2.27175747186358e-45	1.25600404109868e-43	4.78436768591641e-44	NOS2/ASS1/GSTP1/BMP6/PPARGC1A/TNF/ABCC2/WNT5A/TGFB1/MRC1/TNFAIP3/CD14/IL10/MAPK1/MAPK8/SRC/CXCL10/CCL5/TP53/NFKB1/IL1B/NFKBIA/HAMP/NOD2/TLR2/HAVCR2/HMGB1/NLRP3/CD36/LBP/RHOA/CXCL8/MAPK14/VIM/CSF3/ARG1/SCARB1/CCL2/IL6/LYN/DDIT3/HSPA5/ICAM1/TNFRSF1B/MAPK3/LTF/RELA/NOS3/TLR4/SERPINE1/AKT1/MIF/LCN2/CEBPB/CCL3/PRKCA/CSF2	57	BP
GO:0072593	reactive oxygen species metabolic process	63/415	269/17910	2.93866344701112e-45	1.61311632787718e-43	6.14467898205859e-44	XDH/EDN1/NOS2/SOD2/LEP/BRCA1/BCL2/ASS1/CYP1A1/AGT/CRP/GSTP1/NFE2L2/HP/PDGFRB/TNF/JAK2/SFTPD/F2/PTGS2/BMP7/ACE2/TGFB1/FOXO1/INS/MMP3/MMP8/IL10/EGFR/SOD1/HBB/TP53/CDKN1A/CAT/IL1B/TLR2/AGTR2/NOS1/PKD2/SMAD3/CD36/RHOA/MTOR/MAPK14/MPO/PDGFB/ATG5/STAT3/NOX4/AGTR1/PTX3/HSP90AA1/CD34/CYP1A2/IFNG/ICAM1/CAV1/HIF1A/NOS3/TLR4/INSR/TGFBR2/AKT1	63	BP
GO:0031347	regulation of defense response	104/415	885/17910	4.26200601310372e-45	2.32294441210653e-43	8.84855447737324e-44	IGF1/EP300/NOS2/LEP/ELANE/FOXP3/APOE/C3/HSPD1/IRF3/AGT/GSTP1/TNF/CREBBP/LDLR/JAK2/TNFRSF1A/SFTPD/F2/XIAP/WNT5A/PTGS2/AGER/ESR1/ACE2/PSMB8/TNFAIP3/STAT1/MMP12/CCR7/CR1/PTPRC/CD14/GGT1/INS/MMP3/MMP8/IL10/EGFR/IKBKB/SOD1/TLR7/IL4/SRC/CCL5/LPL/NFKB1/IL1B/NFKBIA/NOD2/TLR2/HAVCR2/HGF/HMGB1/DNASE1/IL12RB1/IRF1/NLRP3/TGM2/PTPN11/SMAD3/CD36/LBP/CASP8/KRAS/PPARG/SELE/IL17A/MAPK14/RAF1/CHUK/NR1H2/ARG1/VTN/A…	104	BP
GO:0042060	wound healing	84/415	550/17910	6.18232922378109e-45	3.34585916089843e-43	1.27450389705969e-43	EDN1/HSPB1/CXCR4/MPL/IGF1/COL1A1/GNAS/APOE/HPS4/FN1/NFE2L2/PDGFRB/IL1A/SHH/JAK2/F2/WNT5A/AGER/TGFB1/SLC11A1/TNFAIP3/MMP12/HMGCR/HMOX1/INS/SMAD2/MAPK1/PLAT/EGFR/APOH/PDGFA/SRC/HBB/PLG/CDKN1A/COL1A2/TGFB2/PLAU/PTEN/IRF1/PTPN11/SMAD3/IFNA2/EZH2/CD36/RHOA/SERPINA1/THBD/MTOR/RAF1/GSN/PDGFB/VTN/SCARB1/S100A8/IL6/ANXA5/CASP3/CD34/COL3A1/PECAM1/PPARA/LYN/TGFB3/PIK3CG/PIK3CA/FGF2/CAV1/MAPK3/CD81/HNF4A/SH2…	84	BP
GO:0048732	gland development	75/415	422/17910	8.28962610817753e-45	4.45494941547862e-43	1.69697830009876e-43	XDH/FGFR1/UGT1A1/AIRE/BCL2/ASS1/CYP1A1/ATP7B/TNF/EGF/SHH/JAK2/WNT5A/BMP7/CTNNB1/CCND1/ESR1/TYMS/VEGFA/TGFB1/PCSK9/NKX2-1/TNFAIP3/IGFBP5/CCL11/HMOX1/SMAD2/BRCA2/IL10/MAPK1/EGFR/SOD1/CREB1/PDGFA/SRC/CLDN1/HAMP/NME1/HGF/TGFB2/PTEN/PKD1/FASN/TGM2/RXRA/PKD2/SMAD3/EZH2/CSF1/KRAS/RAF1/PCNA/ARG1/VTN/SMAD4/ADA/VDR/TGFB3/IGF2/FGF7/PIK3CA/CDH1/CAV1/MAPK3/HNF4A/RELA/HIF1A/INSR/TGFBR2/AKT1/SERPINC1/APOA1/CEBP…	75	BP
GO:0071219	cellular response to molecule of bacterial origin	54/415	183/17910	1.18071436348342e-44	6.30124297456255e-43	2.40026801523932e-43	NOS2/ASS1/GSTP1/BMP6/PPARGC1A/TNF/ABCC2/WNT5A/TGFB1/MRC1/TNFAIP3/CD14/IL10/MAPK1/MAPK8/SRC/CXCL10/CCL5/NFKB1/IL1B/NFKBIA/HAMP/NOD2/TLR2/HAVCR2/HMGB1/NLRP3/CD36/LBP/RHOA/CXCL8/MAPK14/VIM/CSF3/ARG1/SCARB1/CCL2/IL6/LYN/ICAM1/TNFRSF1B/MAPK3/LTF/RELA/NOS3/TLR4/SERPINE1/AKT1/MIF/LCN2/CEBPB/CCL3/PRKCA/CSF2	54	BP
GO:0002520	immune system development	106/415	938/17910	2.14431273928973e-44	1.13648575182356e-42	4.32909889507423e-43	MPL/EP300/LEP/FOXP3/GNAS/AIRE/HSPD1/BCL2/IL5/NFE2L2/TNF/CREBBP/ITGB1/SHH/THPO/JAK2/WNT5A/B2M/AGER/CTNNB1/NOTCH2/PSMB8/VEGFA/TGFB1/MYC/TNFAIP3/STAT1/CCR7/CR1/PTPRC/ANXA2/EIF2AK2/BGLAP/BRCA2/IL10/MAPK1/MMP14/SOD1/CREB1/LGALS3/IL4/TP53/SIRT1/ALAS2/NFKBIA/TLR2/HAVCR2/NME1/EPO/HMGB1/IL12RB1/TGFB2/IRF1/NLRP3/FASN/PTPN11/SMAD3/IFNA2/CSF1/SLC40A1/CASP8/PPARG/RHOA/IL17A/MTOR/MAPK14/RAF1/SMAD7/CSF3/ATG5/ST…	106	BP
GO:0030155	regulation of cell adhesion	90/415	659/17910	4.03039880067352e-44	2.1214804646011e-42	8.08113847489046e-43	CXCR4/IGF1/SEMA4D/LEP/ELANE/COL1A1/FOXP3/HSPD1/PTK2/BCL2/ASS1/FN1/TNF/SHH/JAK2/SFTPD/WNT5A/BMP7/AGER/VEGFA/TGFB1/MMP12/CCR7/PTPRC/IL10/MMP14/LGALS3/IL4/SRC/PLG/CCL5/IL1B/NOD2/HAVCR2/EPO/HMGB1/IL12RB1/TGFB2/PLAU/PTEN/IRF1/NLRP3/PKD1/TGM2/PTPN11/SMAD3/IFNA2/CSF1/CD36/RHOA/CXCL8/MAPK14/GSN/SMAD7/CALR/ARG1/VTN/TFRC/CCL2/ADA/IL6/CASP3/PPARA/LYN/IGF2/CD80/PIK3CG/PIK3CA/IL2/CDH1/IFNG/CXCL12/ICAM1/CAV1/C…	90	BP
GO:0032103	positive regulation of response to external stimulus	66/415	315/17910	4.1161045170037e-44	2.15185464035193e-42	8.19683971484946e-43	EDN1/HSPB1/CXCR4/FGFR1/MET/C3/AGT/BMP6/PDGFRB/TNF/LDLR/JAK2/TNFRSF1A/F2/WNT5A/PTGS2/AGER/VEGFA/TGFB1/CCR7/TUBB2B/MMP8/EGFR/APOH/TLR7/CXCL10/PLG/CCL5/LPL/IL1B/NFKBIA/NOD2/TLR2/HAVCR2/HMGB1/TGM2/SMAD3/CSF1/LBP/CXCR2/CXCL8/THBD/IL17A/MAPK14/PDGFB/CALR/ARG1/AGTR1/S100A8/IL6/PIK3CG/IL2/FGF2/CXCL12/MAPK3/CD81/TLR4/SERPINE1/TLR9/MIF/F3/LTA/CEBPB/CCL3/PRKCA/S100A9	66	BP
GO:0016310	phosphorylation	162/415	2243/17910	1.04290693125e-43	5.41536470720016e-42	2.06281947070145e-42	XDH/EDN1/HSPB1/CXCR4/IGF1/SEMA4D/FGFR1/MET/LEP/ELANE/DGUOK/BIRC5/APOE/C3/PTK2/BCL2/GPD1/GCK/GUCY2C/EZR/IL5/AGT/PKHD1/GSTP1/FN1/BMP6/PPARGC1A/PDGFRB/TNF/EGF/THPO/JAK2/TNFRSF1A/F2/WNT5A/PTGS2/BMP7/AGER/CTNNB1/CCND1/NOTCH2/PSMB8/VEGFA/TGFB1/MYC/VCP/IL13/SLC11A1/TNFAIP3/FOXO1/CCR7/PTPRC/HMGCR/EIF2AK2/CCL11/INS/SMAD2/MMP8/MAPK1/EGFR/IKBKB/SOD1/CREB1/TLR7/PDGFA/IL4/MAPK8/SRC/CXCL10/CCL5/TP53/CDKN1A/NFK…	162	BP
GO:0045935	positive regulation of nucleobase-containing compound metabolic process	141/415	1715/17910	1.26252654939044e-43	6.46838986881704e-42	2.46393757150706e-42	EDN1/IGF1/EP300/FGFR1/MET/BRCA1/COL1A1/FOXP3/APOE/AIRE/GPD1/TFR2/IRF3/IL5/AGT/HSPA8/TCF4/NFE2L2/NR1I3/BMP6/PPARGC1A/SNAI1/PDGFRB/TNF/EGF/IL1A/CREBBP/SHH/TNFRSF1A/SPP1/WNT5A/BMP7/CTNNB1/ESR1/VEGFA/TGFB1/MYC/NKX2-1/VCP/SLC11A1/FOXO1/STAT1/MMP12/PTPRC/INS/SMAD2/BRCA2/IL10/MAPK1/EGFR/IKBKB/CREB1/IL4/TERT/SRC/CXCL10/TP53/NFKB1/SIRT1/IL1B/NFKBIA/SREBF1/NOD2/TLR2/AGTR2/TWIST1/EPO/HGF/HMGB1/TGFB2/AXIN1/I…	141	BP
GO:0002252	immune effector process	118/415	1197/17910	1.26253543308075e-43	6.46838986881704e-42	2.46393757150706e-42	LEP/ELANE/FOXP3/AIRE/C3/HSPD1/PTK2/BCL2/ALAD/IRF3/IL5/CRP/HSPA8/GSTP1/GAA/HP/TNF/F2/WNT5A/B2M/AGER/NOTCH2/TGFB1/VCP/IL13/SLC11A1/TNFAIP3/STAT1/MMP12/CR1/PTPRC/CD14/ANXA2/EIF2AK2/HMOX1/INS/CXCR1/MMP8/IL10/MAPK1/TLR7/LGALS3/IL4/SRC/HBB/CXCL10/TP53/CAT/IDH1/NFKB1/IL1B/NOD2/TLR2/HAVCR2/HMGB1/DNASE1/IL12RB1/TGFB2/PLAU/DSP/IRF1/ALOX5/NLRP3/IFNA2/CD36/LBP/CXCR2/RHOA/SERPINA1/MTOR/MAPK14/GSN/SMAD7/MPO/AT…	118	BP
GO:0051128	regulation of cellular component organization	165/415	2340/17910	2.74580665966872e-43	1.3974519324208e-41	5.32317066611272e-42	EDN1/CXCR4/MPL/IGF1/EP300/SEMA4D/FGFR1/MET/BRCA1/DGUOK/FOXP3/APOE/C3/PTK2/BCL2/TF/TFR2/EZR/IL5/AGT/PKHD1/HPS4/HSPA8/FN1/NFE2L2/PPARGC1A/SNAI1/PDGFRB/TNF/EGF/IL1A/LDLR/TNFRSF1A/SPP1/SFTPD/F2/WNT5A/BMP7/B2M/CTNNB1/NOTCH2/ESR1/ACE2/VEGFA/TGFB1/MYC/PCSK9/VCP/SLC11A1/MMP1/IGFBP5/CCR7/PTPRC/CD14/ANXA2/EIF2AK2/CCL11/INS/MMP3/TUBB2B/IL10/MAPK1/MMP14/MDM2/EGFR/IKBKB/SOD1/CREB1/LGALS3/PDGFA/IL4/BBS4/MAPK8/…	165	BP
GO:0050865	regulation of cell activation	81/415	535/17910	5.47954161815723e-43	2.7704129826012e-41	1.05530507202876e-41	MPL/IGF1/LEP/FOXP3/APOE/HSPD1/BCL2/IL5/PDGFRB/TNF/LDLR/SHH/JAK2/SFTPD/F2/WNT5A/AGER/CTNNB1/TGFB1/IL13/TNFAIP3/GCLC/CCR7/CR1/PTPRC/HMOX1/MMP8/IL10/MMP14/SOD1/LGALS3/PDGFA/IL4/SRC/CCL5/CDKN1A/IL1B/NOD2/HAVCR2/EPO/HMGB1/IL12RB1/IRF1/NLRP3/PTPN11/IFNA2/LBP/RHOA/THBD/GSN/SMAD7/PDGFB/ARG1/TFRC/CCL2/ADA/IL6/CASP3/LYN/IGF2/CD80/PIK3CA/IL2/IFNG/CAV1/TNFRSF1B/CD81/SH2B3/NOS3/TLR4/VCAM1/TGFBR2/TLR9/AKT1/MIF…	81	BP
GO:0046677	response to antibiotic	66/415	328/17910	6.28686078078137e-43	3.15781209805914e-41	1.20287305341266e-41	EDN1/MET/UGT1A1/LEP/COL1A1/BCL2/ALAD/CYP1A1/ACTC1/GSTP1/NFE2L2/HP/PDGFRB/JAK2/CCND1/TYMS/IL13/TNFAIP3/FOXO1/STAT1/CD14/HMGCR/HMOX1/BGLAP/IL10/MDM2/SOD1/SRC/HBB/TP53/CAT/CLDN1/SIRT1/HAMP/HGF/PTEN/EZH2/CASP8/RHOA/GSN/PDGFB/PCNA/CSF3/CHUK/STAT3/ARG1/CYP2E1/S100A8/ADA/IL6/HSP90AA1/CASP3/RBP4/FABP1/IL2/HSPA5/ICAM1/RELA/CFTR/VCAM1/JAK1/LCN2/SPARC/TXN/JUN/ADIPOQ	66	BP
GO:0048534	hematopoietic or lymphoid organ development	101/415	890/17910	2.48092409892832e-42	1.23804556495222e-40	4.71596030015015e-41	MPL/EP300/LEP/FOXP3/GNAS/AIRE/BCL2/IL5/NFE2L2/TNF/CREBBP/ITGB1/SHH/THPO/JAK2/WNT5A/B2M/AGER/CTNNB1/NOTCH2/PSMB8/VEGFA/TGFB1/MYC/STAT1/CCR7/CR1/PTPRC/ANXA2/EIF2AK2/BGLAP/BRCA2/IL10/MAPK1/MMP14/SOD1/CREB1/LGALS3/IL4/TP53/SIRT1/ALAS2/NFKBIA/TLR2/NME1/EPO/HMGB1/IL12RB1/TGFB2/IRF1/NLRP3/FASN/PTPN11/IFNA2/CSF1/SLC40A1/CASP8/PPARG/RHOA/IL17A/MTOR/MAPK14/RAF1/SMAD7/CSF3/ATG5/STAT3/TFRC/ADA/IL6/CASP3/ACE/…	101	BP
GO:0006928	movement of cell or subcellular component	151/415	2012/17910	2.99251560192353e-42	1.48370854198595e-40	5.65173914359886e-41	EDN1/HSPB1/CXCR4/IGF1/SOD2/SEMA4D/FGFR1/MET/LEP/ELANE/COL1A1/APOE/AIRE/PTK2/BCL2/ACTC1/EZR/AGT/PKHD1/GSTP1/FN1/NFE2L2/PPARGC1A/SNAI1/PDGFRB/TNF/EGF/ITGB1/SHH/JAK2/SFTPD/F2/WNT5A/PTGS2/BMP7/AGER/CTNNB1/VEGFA/TGFB1/NKX2-1/MMP1/IGFBP5/MMP12/CCR7/PTPRC/CCL11/HMOX1/INS/TUBB2B/CXCR1/IL10/MAPK1/MMP14/MDM2/EGFR/SOD1/APOH/LGALS3/PDGFA/IL4/BBS4/TERT/SRC/CXCL10/CCL5/UMOD/SIRT1/ABCC1/IL1B/IGFBP3/AGTR2/TWIST1…	151	BP
GO:2000377	regulation of reactive oxygen species metabolic process	53/415	194/17910	7.0530225614146e-42	3.47451784515841e-40	1.32351253328569e-40	XDH/EDN1/LEP/BRCA1/BCL2/ASS1/AGT/CRP/GSTP1/NFE2L2/HP/PDGFRB/TNF/JAK2/F2/PTGS2/BMP7/ACE2/TGFB1/FOXO1/INS/MMP3/MMP8/IL10/EGFR/SOD1/HBB/TP53/CDKN1A/IL1B/AGTR2/PKD2/SMAD3/CD36/RHOA/MTOR/MAPK14/PDGFB/ATG5/STAT3/NOX4/AGTR1/PTX3/HSP90AA1/CD34/IFNG/ICAM1/CAV1/HIF1A/TLR4/INSR/TGFBR2/AKT1	53	BP
GO:0009986	cell surface	87/415	667/18675	2.3166649666318e-42	3.66612230969483e-40	2.07890198321433e-40	CXCR4/MPL/MMP7/MET/ELANE/C3/HSPD1/TF/TFR2/PKHD1/PDGFRB/TNF/ITGB1/LDLR/ABCC2/SHH/TNFRSF1A/F2/WNT5A/B2M/AGER/NOTCH2/ACE2/SCNN1B/VEGFA/TGFB1/MRC1/PCSK9/IL13/CCR7/CR1/PTPRC/CD14/ANXA2/PLAT/EGFR/APOH/LGALS3/PDGFA/CXCL10/PLG/LPL/NOD2/SCNN1G/HLA-C/TLR2/HAVCR2/EPO/HMGB1/PLAU/PKD1/FAS/CD36/LBP/CXCR2/CDH2/ABCB1/THBD/IL17A/PDGFB/CALR/HLA-A/SCARB1/TFRC/ADA/ANXA5/ACE/CD34/ENG/PECAM1/TGFB3/CD80/HSPA5/ICAM1/LTF…	87	CC
GO:0045597	positive regulation of cell differentiation	104/415	962/17910	1.03429839321299e-41	5.06279181645974e-40	1.92851748677527e-40	EDN1/CXCR4/MPL/IGF1/EP300/SOD2/SEMA4D/FGFR1/COL1A1/FOXP3/GNAS/APOE/BCL2/IL5/AGT/RARB/TCF4/FN1/NFE2L2/BMP6/SNAI1/TNF/SHH/THPO/JAK2/WNT5A/PTGS2/BMP7/AGER/CTNNB1/VEGFA/TGFB1/IL13/STAT1/PTPRC/INS/SMAD2/TUBB2B/MMP14/CREB1/IL4/TERT/LPL/NFKB1/SIRT1/IL1B/IGFBP3/HAMP/TLR2/NME1/TWIST1/EPO/HGF/HMGB1/IL12RB1/TGFB2/PTEN/NLRP3/SMAD3/EZH2/CSF1/CD36/CASP8/CDH2/PPARG/RHOA/IL17A/MTOR/MAPK14/CALR/STAT3/AGTR1/SMAD4/…	104	BP
GO:0071417	cellular response to organonitrogen compound	81/415	559/17910	1.6153197857047e-41	7.85679275515229e-40	2.99280767757813e-40	MMP2/EDN1/IGF1/LEP/BRCA1/COL1A1/PTK2/GPD1/GCK/ASS1/EZR/AGT/GSTP1/NFE2L2/PPARGC1A/TNF/JAK2/PTGS2/AGER/CTNNB1/TGFB1/PCSK9/FOXO1/STAT1/GCLC/IGFBP5/INS/BGLAP/MAPK1/MDM2/EGFR/SOD1/CREB1/SRC/TP53/LPL/NFKB1/SIRT1/IL1B/SREBF1/NOD2/AGTR2/COL1A2/PTEN/NLRP3/PKD2/PTPN11/EZH2/CD36/TSC2/PPARG/MTOR/VIM/STAT3/ARG1/NOX4/AGTR1/ADRB2/CASP3/COL3A1/LYN/IGF2/PIK3CG/SP1/PIK3CA/CDH1/HSPA5/ICAM1/CAV1/MAPK3/HSP90B1/RELA/C…	81	BP
GO:0045893	positive regulation of transcription, DNA-templated	123/415	1368/17910	2.04387490372878e-41	9.87872870135578e-40	3.76300305016203e-40	EDN1/IGF1/EP300/MET/BRCA1/COL1A1/FOXP3/APOE/AIRE/TFR2/IRF3/IL5/AGT/TCF4/NFE2L2/NR1I3/BMP6/PPARGC1A/SNAI1/TNF/EGF/IL1A/CREBBP/SHH/TNFRSF1A/SPP1/WNT5A/BMP7/CTNNB1/ESR1/VEGFA/TGFB1/MYC/NKX2-1/SLC11A1/FOXO1/STAT1/MMP12/SMAD2/BRCA2/IL10/MAPK1/EGFR/IKBKB/CREB1/IL4/TERT/SRC/CXCL10/TP53/NFKB1/SIRT1/IL1B/NFKBIA/SREBF1/NOD2/TLR2/AGTR2/TWIST1/EPO/HGF/HMGB1/TGFB2/AXIN1/IRF1/NLRP3/PKD1/RXRA/NOS1/PKD2/SMAD3/IF…	123	BP
GO:0048545	response to steroid hormone	68/415	374/17910	3.12860296222904e-41	1.50270711029564e-39	5.72410844602564e-40	ABCA3/EDN1/EP300/UGT1A1/BRCA1/COL1A1/BCL2/ASS1/ALAD/RARB/GSTP1/NR1I3/BMP6/PPARGC1A/TNF/ABCC2/JAK2/SPP1/PTGS2/BMP7/CTNNB1/CCND1/ESR1/TYMS/TGFB1/FOXO1/BGLAP/IL10/MDM2/EGFR/SRC/CDKN1A/IDH1/CLDN1/SIRT1/AGXT/SREBF1/TLR2/AGTR2/EPO/TGFB2/AXIN1/RXRA/KRAS/PPARG/RHOA/NR3C1/CALR/PCNA/NR1H2/ARG1/IL6/CASP3/VDR/ENG/PPARA/TGFB3/FOS/NR5A2/ICAM1/CAV1/HNF4A/RELA/NR1H4/TGFBR2/SPARC/NR1I2/ADIPOQ	68	BP
GO:0031982	vesicle	205/415	3756/18675	1.85440753844274e-41	2.3476799436685e-39	1.33126941180836e-39	ABCA3/EDN1/HSPB1/CXCR4/IGF1/MMP7/SOD2/FGFR1/ELANE/COL1A1/GNAS/APOE/ALDH2/C3/HSPD1/GPD1/TF/ASS1/ALAD/TFR2/ACTC1/EZR/AGT/PKHD1/HPS4/HSPA8/GSTP1/FN1/GAA/HP/ATP7B/BMP6/PDGFRB/TNF/EGF/ITGB1/LDLR/KRT8/JAK2/SPP1/SFTPD/F2/WNT5A/BMP7/B2M/CTNNB1/ACE2/SCNN1B/PSMB8/VEGFA/TGFB1/MRC1/PCSK9/VCP/SLC11A1/TNFAIP3/GPT/CR1/SLC22A5/PTPRC/CD14/ANXA2/FH/GGT1/INS/BGLAP/ASL/BRCA2/CXCR1/MMP8/MAPK1/MMP14/PLAT/MDM2/EGFR/SOD…	205	CC
GO:1901699	cellular response to nitrogen compound	84/415	620/17910	8.45872205760938e-41	4.03759496973466e-39	1.53799974123646e-39	MMP2/EDN1/IGF1/LEP/BRCA1/COL1A1/PTK2/GPD1/GCK/ASS1/IRF3/EZR/AGT/GSTP1/NFE2L2/PPARGC1A/TNF/JAK2/PTGS2/AGER/CTNNB1/TGFB1/PCSK9/FOXO1/STAT1/GCLC/IGFBP5/INS/BGLAP/MMP3/MAPK1/MDM2/EGFR/SOD1/CREB1/SRC/TP53/LPL/NFKB1/SIRT1/IL1B/SREBF1/NOD2/AGTR2/COL1A2/PTEN/NLRP3/PKD2/PTPN11/EZH2/CD36/TSC2/PPARG/MTOR/VIM/STAT3/ARG1/NOX4/AGTR1/ADRB2/CASP3/COL3A1/LYN/IGF2/PIK3CG/SP1/PIK3CA/CDH1/HSPA5/ICAM1/CAV1/MAPK3/HSP9…	84	BP
GO:0007159	leukocyte cell-cell adhesion	64/415	328/17910	9.42579188814969e-41	4.47143275681669e-39	1.70325713066565e-39	IGF1/SEMA4D/LEP/ELANE/FOXP3/HSPD1/ASS1/EZR/TNF/ITGB1/SHH/SFTPD/BMP7/AGER/TGFB1/CCR7/PTPRC/IL10/LGALS3/IL4/SRC/CCL5/UMOD/IL1B/NOD2/HAVCR2/EPO/HMGB1/IL12RB1/IRF1/NLRP3/PTPN11/IFNA2/RHOA/SELE/SMAD7/ARG1/TFRC/S100A8/CCL2/ADA/IL6/CASP3/PECAM1/PPARA/LYN/IGF2/CD80/PIK3CA/IL2/IFNG/CXCL12/ICAM1/CAV1/CD81/RELA/VCAM1/TGFBR2/AKT1/IFNB1/CEBPB/CD274/CD40LG/S100A9	64	BP
GO:0071407	cellular response to organic cyclic compound	78/415	532/17910	2.56287225662496e-40	1.20832351485662e-38	4.60274313572749e-39	EDN1/EP300/UGT1A1/BRCA1/COL1A1/GPD1/ASS1/CYP1A1/IRF3/EZR/RARB/GSTP1/NR1I3/PPARGC1A/TNF/ABCC2/JAK2/SPP1/PTGS2/BMP7/CTNNB1/ESR1/TGFB1/FOXO1/STAT1/GCLC/IGFBP5/BGLAP/IL10/MAPK1/MDM2/EGFR/SOD1/SRC/CCL5/NFKB1/SIRT1/IL1B/HAMP/NOD2/AGTR2/AXIN1/RXRA/PKD2/EZH2/CASP8/PPARG/RHOA/NR3C1/PDGFB/CALR/NR1H2/STAT3/ARG1/NOX4/CCL2/CASP3/VDR/PPARA/PIK3CG/CDH1/HSPA5/NR5A2/ICAM1/CAV1/MAPK3/HSP90B1/ABCB4/HNF4A/CFTR/NR1H4…	78	BP
GO:0000165	MAPK cascade	98/415	882/17910	3.39041737955189e-40	1.58874131474733e-38	6.05182973846843e-39	XDH/EDN1/CXCR4/IGF1/FGFR1/MET/LEP/ELANE/APOE/PTK2/EZR/IL5/AGT/PKHD1/GSTP1/FN1/PDGFRB/TNF/EGF/THPO/JAK2/WNT5A/BMP7/AGER/CTNNB1/NOTCH2/PSMB8/VEGFA/TGFB1/MYC/FOXO1/CCR7/PTPRC/HMGCR/EIF2AK2/CCL11/INS/MMP8/MAPK1/EGFR/IKBKB/SOD1/PDGFA/MAPK8/SRC/CCL5/NFKB1/IL1B/REN/IGFBP3/NOD2/HAVCR2/EPO/HGF/HMGB1/TGFB2/PTEN/AXIN1/PTPN11/EZH2/FAS/CD36/CDH2/KRAS/MAPK14/RAF1/PDGFB/CHUK/NOX4/ADRB2/SMAD4/CCL2/IL6/LYN/TGFB3/…	98	BP
GO:0071702	organic substance transport	163/415	2416/17910	3.76504038640815e-40	1.75359608300282e-38	6.67979414009637e-39	EDN1/ABCB7/HSPB1/IGF1/NOS2/LEP/COL1A1/FOXP3/APOE/C3/TF/GCK/EDNRA/TFR2/IRF3/EZR/IL5/AGT/HPS4/CRP/HSPA8/FN1/NFE2L2/BMP6/TNF/EGF/IL1A/LDLR/ABCC2/SHH/JAK2/SPP1/WNT5A/PTGS2/AGER/SLCO1B1/ACE2/TGFB1/PCSK9/VCP/IL13/SLC11A1/TNFAIP3/MMP12/CCR7/SLC22A5/CD14/HMGCR/ANXA2/ABCD3/INS/SMAD2/SLC10A1/MMP8/IL10/MAPK1/MDM2/EGFR/APOH/BBS4/TERT/CETP/SRC/HBB/CCL5/TP53/CDKN1A/LPL/CAT/ABCB11/IDH1/NFKB1/SIRT1/ABCC1/IL1B/RE…	163	BP
GO:0070482	response to oxygen levels	68/415	389/17910	4.40994841587485e-40	2.04159358891556e-38	7.77683357295369e-39	EDN1/CXCR4/MPL/EP300/NOS2/LEP/COL1A1/BCL2/ALAD/EDNRA/CYP1A1/NFE2L2/PPARGC1A/PDGFRB/CREBBP/PTGS2/BMP7/AGER/PSMB8/VEGFA/TGFB1/MYC/FOXO1/HMOX1/MMP14/PLAT/MDM2/CREB1/TERT/SRC/TP53/CDKN1A/CAT/SIRT1/ALAS2/TLR2/TWIST1/EPO/TGFB2/PLAU/PTEN/NOS1/MTHFR/SMAD3/FAS/PPARG/RHOA/MTOR/RAF1/NOX4/SMAD4/ADA/CASP3/CD34/PPARA/TGFB3/FABP1/CXCL12/ICAM1/CAV1/HSP90B1/HIF1A/VCAM1/TGFBR2/AKT1/LTA/NOTCH1/ADIPOQ	68	BP
GO:0023014	signal transduction by protein phosphorylation	98/415	886/17910	5.03512499777302e-40	2.31706201244824e-38	8.82614725421165e-39	XDH/EDN1/CXCR4/IGF1/FGFR1/MET/LEP/ELANE/APOE/PTK2/EZR/IL5/AGT/PKHD1/GSTP1/FN1/PDGFRB/TNF/EGF/THPO/JAK2/WNT5A/BMP7/AGER/CTNNB1/NOTCH2/PSMB8/VEGFA/TGFB1/MYC/FOXO1/CCR7/PTPRC/HMGCR/EIF2AK2/CCL11/INS/MMP8/MAPK1/EGFR/IKBKB/SOD1/PDGFA/MAPK8/SRC/CCL5/NFKB1/IL1B/REN/IGFBP3/NOD2/HAVCR2/EPO/HGF/HMGB1/TGFB2/PTEN/AXIN1/PTPN11/EZH2/FAS/CD36/CDH2/KRAS/MAPK14/RAF1/PDGFB/CHUK/NOX4/ADRB2/SMAD4/CCL2/IL6/LYN/TGFB3/…	98	BP
GO:0050801	ion homeostasis	86/415	669/17910	5.51460497196158e-40	2.52260352437647e-38	9.60909550565486e-39	EDN1/ELANE/APOE/BCL2/TF/EDNRA/TFR2/AGT/PKHD1/ATP7B/BMP6/ABCC2/JAK2/F2/XIAP/WNT5A/B2M/ESR1/SCNN1B/TGFB1/MYC/IL13/SLC11A1/GCLC/CCR7/PTPRC/ANXA2/CCL11/HMOX1/INS/MAPK1/EGFR/SOD1/GPR35/CETP/SRC/CXCL10/CCL5/UMOD/SIRT1/ALAS2/HAMP/SCNN1G/AGTR2/EPO/HMGB1/PKD1/TGM2/NOS1/PKD2/SMAD3/SLC40A1/CD36/CALCA/STEAP4/SMAD7/CALR/ATG5/AGTR1/SMAD4/TFRC/S100A8/VDR/PRKAA2/SLC11A2/LYN/PIK3CG/IL2/DDIT3/FGF2/CXCL12/CAV1/MAPK…	86	BP
GO:0033036	macromolecule localization	174/415	2735/17910	5.70502202978802e-40	2.59426593484739e-38	9.88207179373433e-39	EDN1/HSPB1/IGF1/NOS2/LEP/COL1A1/FOXP3/APOE/C3/BCL2/TF/GCK/TFR2/IRF3/EZR/IL5/AGT/HPS4/CRP/HSPA8/FN1/BMP6/TNF/EGF/IL1A/ITGB1/LDLR/ABCC2/NOP10/SHH/JAK2/TNFRSF1A/SPP1/F2/WNT5A/PTGS2/BMP7/AGER/CTNNB1/ESR1/SLCO1B1/TGFB1/PCSK9/VCP/IL13/TNFAIP3/MMP12/CCR7/CD14/HMGCR/ANXA2/ABCD3/INS/SMAD2/SLC10A1/BRCA2/MMP8/IL10/MAPK1/MMP14/MDM2/EGFR/IKBKB/APOH/LGALS3/BBS4/MAPK8/TERT/CETP/SRC/CCL5/TP53/CDKN1A/LPL/CAT/ABCB…	174	BP
GO:0006796	phosphate-containing compound metabolic process	186/415	3115/17910	1.82648471107765e-39	8.25678529684219e-38	3.14517274396715e-38	XDH/EDN1/HSPB1/CXCR4/IGF1/SEMA4D/FGFR1/MET/LEP/ELANE/DGUOK/BIRC5/APOE/C3/PTK2/BCL2/GPD1/GCK/GUCY2C/EZR/IL5/AGT/PKHD1/HSPA8/GSTP1/FN1/BMP6/PPARGC1A/PDGFRB/TNF/EGF/LDLR/THPO/JAK2/TNFRSF1A/F2/WNT5A/PTGS2/BMP7/AGER/CTNNB1/CCND1/NOTCH2/TYMS/PSMB8/VEGFA/TGFB1/MYC/PCSK9/NKX2-1/VCP/IL13/SLC11A1/TNFAIP3/FOXO1/CCR7/PTPRC/HMGCR/EIF2AK2/CCL11/INS/SMAD2/PNPLA3/MMP8/MAPK1/EGFR/IKBKB/SOD1/CREB1/TLR7/LGALS3/PDGF…	186	BP
GO:1903508	positive regulation of nucleic acid-templated transcription	124/415	1453/17910	2.05308778126267e-39	9.22688865438807e-38	3.51470429036102e-38	EDN1/IGF1/EP300/MET/BRCA1/COL1A1/FOXP3/APOE/AIRE/TFR2/IRF3/IL5/AGT/TCF4/NFE2L2/NR1I3/BMP6/PPARGC1A/SNAI1/TNF/EGF/IL1A/CREBBP/SHH/TNFRSF1A/SPP1/WNT5A/BMP7/CTNNB1/ESR1/VEGFA/TGFB1/MYC/NKX2-1/SLC11A1/FOXO1/STAT1/MMP12/SMAD2/BRCA2/IL10/MAPK1/EGFR/IKBKB/CREB1/IL4/TERT/SRC/CXCL10/TP53/NFKB1/SIRT1/IL1B/NFKBIA/SREBF1/NOD2/TLR2/AGTR2/TWIST1/EPO/HGF/HMGB1/TGFB2/AXIN1/IRF1/NLRP3/PKD1/RXRA/NOS1/PKD2/SMAD3/IF…	124	BP
GO:1902680	positive regulation of RNA biosynthetic process	124/415	1454/17910	2.20523727685868e-39	9.8530514375924e-38	3.75322207279313e-38	EDN1/IGF1/EP300/MET/BRCA1/COL1A1/FOXP3/APOE/AIRE/TFR2/IRF3/IL5/AGT/TCF4/NFE2L2/NR1I3/BMP6/PPARGC1A/SNAI1/TNF/EGF/IL1A/CREBBP/SHH/TNFRSF1A/SPP1/WNT5A/BMP7/CTNNB1/ESR1/VEGFA/TGFB1/MYC/NKX2-1/SLC11A1/FOXO1/STAT1/MMP12/SMAD2/BRCA2/IL10/MAPK1/EGFR/IKBKB/CREB1/IL4/TERT/SRC/CXCL10/TP53/NFKB1/SIRT1/IL1B/NFKBIA/SREBF1/NOD2/TLR2/AGTR2/TWIST1/EPO/HGF/HMGB1/TGFB2/AXIN1/IRF1/NLRP3/PKD1/RXRA/NOS1/PKD2/SMAD3/IF…	124	BP
GO:0098609	cell-cell adhesion	91/415	771/17910	2.52833017814378e-39	1.12313395485751e-37	4.27823926097831e-38	HSPB1/MPL/IGF1/SEMA4D/LEP/ELANE/FOXP3/GNAS/HSPD1/PTK2/BCL2/ASS1/EZR/PKHD1/TNF/ITGB1/SHH/JAK2/SFTPD/WNT5A/BMP7/AGER/CTNNB1/TGFB1/CCR7/PTPRC/ANXA2/IL10/EGFR/LGALS3/IL4/SRC/HBB/PLG/CCL5/UMOD/CLDN1/IL1B/NOD2/HAVCR2/EPO/HMGB1/IL12RB1/TGFB2/DSP/IRF1/NLRP3/PKD1/PTPN11/IFNA2/CDH2/RHOA/SELE/MAPK14/SMAD7/ARG1/TFRC/S100A8/CCL2/ADA/IL6/CASP3/CD34/PECAM1/PPARA/LYN/IGF2/CD80/PIK3CG/PIK3CA/IL2/CDH1/IFNG/CXCL12/…	91	BP
GO:0002790	peptide secretion	80/415	582/17910	2.87857628912117e-39	1.27137119436185e-37	4.84290421055413e-38	EDN1/IGF1/NOS2/LEP/FOXP3/APOE/GCK/TFR2/IRF3/EZR/IL5/AGT/CRP/FN1/BMP6/TNF/IL1A/JAK2/WNT5A/AGER/TGFB1/IL13/TNFAIP3/MMP12/CCR7/CD14/HMGCR/INS/SMAD2/MMP8/IL10/EGFR/SRC/CCL5/LPL/IL1B/CPT1A/SREBF1/NOD2/TLR2/HAVCR2/AGTR2/TWIST1/HMGB1/TGFB2/NLRP3/PTPN11/IFNA2/CD36/MTTP/IL17A/MAPK14/RAF1/ATG5/CHUK/S100A8/IL6/CD34/LYN/TGFB3/RBP4/IL2/IFNG/GLUL/TNFRSF1B/MAPK3/HNF4A/HIF1A/CFTR/NR1H4/TLR4/TLR9/CANX/MIF/APOA1/C…	80	BP
GO:0030097	hemopoiesis	95/415	847/17910	3.02661954020398e-39	1.32911835236958e-37	5.06287455116227e-38	MPL/EP300/LEP/FOXP3/GNAS/BCL2/IL5/NFE2L2/TNF/CREBBP/ITGB1/SHH/THPO/JAK2/WNT5A/B2M/AGER/CTNNB1/NOTCH2/PSMB8/VEGFA/TGFB1/MYC/STAT1/CCR7/CR1/PTPRC/ANXA2/EIF2AK2/BGLAP/BRCA2/IL10/MMP14/SOD1/CREB1/LGALS3/IL4/TP53/SIRT1/ALAS2/NFKBIA/TLR2/NME1/EPO/HMGB1/IL12RB1/TGFB2/IRF1/NLRP3/FASN/PTPN11/IFNA2/CSF1/CASP8/PPARG/RHOA/IL17A/MTOR/MAPK14/SMAD7/CSF3/ATG5/STAT3/TFRC/ADA/IL6/CASP3/ACE/CD34/SLC11A2/LYN/CD80/IL…	95	BP
GO:0035239	tube morphogenesis	98/415	905/17910	3.19603085617301e-39	1.39553960964145e-37	5.31588625060833e-38	MMP2/XDH/EDN1/HSPB1/CXCR4/FGFR1/MET/LEP/BRCA1/APOE/C3/PTK2/BCL2/EDNRA/AGT/FN1/NFE2L2/PDGFRB/TNF/EGF/IL1A/ITGB1/LDLR/SHH/WNT5A/PTGS2/BMP7/CTNNB1/ESR1/VEGFA/TGFB1/MYC/NKX2-1/TNFAIP3/STAT1/ANXA2/CCL11/HMOX1/SMAD2/IL10/MMP14/EGFR/APOH/PDGFA/BBS4/TERT/SRC/CXCL10/SIRT1/IL1B/AGTR2/TWIST1/HGF/TYMP/TGFB2/PTEN/PKD1/TGM2/PKD2/MTHFR/SMAD3/CSF1/CXCR2/TSC2/KRAS/PPARG/RHOA/CXCL8/MAPK14/SMAD7/STAT3/AGTR1/SMAD4/C…	98	BP
GO:0019725	cellular homeostasis	93/415	814/17910	4.79961981366618e-39	2.08390272700704e-37	7.93799744383327e-38	EDN1/NOS2/ELANE/APOE/BCL2/TF/EDNRA/TFR2/AGT/PKHD1/NFE2L2/GAA/ATP7B/BMP6/PPARGC1A/ABCC2/JAK2/F2/WNT5A/AGER/ESR1/TGFB1/MYC/IL13/SLC11A1/FOXO1/GCLC/CCR7/PTPRC/HMGCR/ANXA2/CCL11/HMOX1/MAPK1/SOD1/SCT/GPR35/POLE/CXCL10/CCL5/SIRT1/ALAS2/HAMP/NME1/AGTR2/EPO/HMGB1/PKD1/TGM2/NOS1/PKD2/SMAD3/SLC40A1/CD36/CALCA/RAF1/MPO/CALR/PCNA/ATG5/NOX4/AGTR1/SMAD4/TFRC/S100A8/CCL2/IL6/VDR/PRKAA2/SLC11A2/LYN/PIK3CG/PIK3CA…	93	BP
GO:0070201	regulation of establishment of protein localization	88/415	723/17910	4.88015420183229e-39	2.10696545174613e-37	8.02584792152313e-38	IGF1/NOS2/LEP/FOXP3/APOE/BCL2/GCK/IRF3/EZR/IL5/HPS4/CRP/HSPA8/FN1/BMP6/TNF/IL1A/SHH/JAK2/WNT5A/PTGS2/AGER/TGFB1/IL13/TNFAIP3/MMP12/CCR7/CD14/HMGCR/INS/MMP8/IL10/MAPK1/MDM2/EGFR/MAPK8/SRC/CCL5/TP53/LPL/IL1B/CPT1A/SREBF1/NOD2/TLR2/HAVCR2/AGTR2/TWIST1/HMGB1/TGFB2/NLRP3/PTPN11/SMAD3/IFNA2/CD36/CASP8/IL17A/MAPK14/ATG5/CHUK/DKC1/IL6/CD34/LYN/TGFB3/RBP4/IL2/CDH1/IFNG/GLUL/TNFRSF1B/MAPK3/CD81/HNF4A/HIF1A…	88	BP
GO:0006793	phosphorus metabolic process	186/415	3139/17910	5.48746696787806e-39	2.35593204738229e-37	8.97421090130485e-38	XDH/EDN1/HSPB1/CXCR4/IGF1/SEMA4D/FGFR1/MET/LEP/ELANE/DGUOK/BIRC5/APOE/C3/PTK2/BCL2/GPD1/GCK/GUCY2C/EZR/IL5/AGT/PKHD1/HSPA8/GSTP1/FN1/BMP6/PPARGC1A/PDGFRB/TNF/EGF/LDLR/THPO/JAK2/TNFRSF1A/F2/WNT5A/PTGS2/BMP7/AGER/CTNNB1/CCND1/NOTCH2/TYMS/PSMB8/VEGFA/TGFB1/MYC/PCSK9/NKX2-1/VCP/IL13/SLC11A1/TNFAIP3/FOXO1/CCR7/PTPRC/HMGCR/EIF2AK2/CCL11/INS/SMAD2/PNPLA3/MMP8/MAPK1/EGFR/IKBKB/SOD1/CREB1/TLR7/LGALS3/PDGF…	186	BP
GO:0032880	regulation of protein localization	101/415	979/17910	1.27057325063172e-38	5.42464190616932e-37	2.06635333918527e-37	IGF1/NOS2/LEP/FOXP3/APOE/BCL2/GCK/IRF3/EZR/IL5/HPS4/CRP/HSPA8/FN1/BMP6/TNF/EGF/IL1A/ITGB1/SHH/JAK2/F2/WNT5A/PTGS2/AGER/CTNNB1/TGFB1/IL13/TNFAIP3/MMP12/CCR7/CD14/HMGCR/INS/MMP8/IL10/MAPK1/MMP14/MDM2/EGFR/LGALS3/MAPK8/TERT/SRC/CCL5/TP53/LPL/IL1B/CPT1A/SREBF1/NOD2/TLR2/HAVCR2/AGTR2/TWIST1/HMGB1/TGFB2/NLRP3/PTPN11/SMAD3/IFNA2/CD36/CASP8/CDH2/IL17A/MAPK14/GSN/ATG5/CHUK/DKC1/IL6/HSP90AA1/CD34/PRKAA2/LY…	101	BP
GO:0002791	regulation of peptide secretion	73/415	483/17910	1.34698149490457e-38	5.71908993831028e-37	2.17851441542867e-37	IGF1/NOS2/LEP/FOXP3/APOE/GCK/TFR2/IRF3/EZR/IL5/CRP/FN1/BMP6/TNF/IL1A/JAK2/WNT5A/AGER/TGFB1/IL13/TNFAIP3/MMP12/CCR7/CD14/HMGCR/INS/MMP8/IL10/EGFR/SRC/CCL5/LPL/IL1B/CPT1A/SREBF1/NOD2/TLR2/HAVCR2/AGTR2/TWIST1/HMGB1/TGFB2/NLRP3/PTPN11/IFNA2/IL17A/MAPK14/ATG5/CHUK/S100A8/IL6/CD34/LYN/TGFB3/RBP4/IL2/IFNG/GLUL/TNFRSF1B/MAPK3/HNF4A/HIF1A/CFTR/NR1H4/TLR4/TLR9/MIF/APOA1/CCL3/KCNN4/CD274/PRKCA/CD40LG	73	BP
GO:0022610	biological adhesion	118/415	1345/17910	1.67620283896625e-38	7.07781253706355e-37	2.69607871322449e-37	HSPB1/CXCR4/MPL/IGF1/SEMA4D/LEP/ELANE/COL1A1/FOXP3/GNAS/HSPD1/PTK2/BCL2/ASS1/EZR/PKHD1/FN1/TNF/ITGB1/SHH/JAK2/SPP1/SFTPD/WNT5A/BMP7/AGER/CTNNB1/ACE2/VEGFA/TGFB1/MMP12/CCR7/PTPRC/ANXA2/CCL11/BGLAP/IL10/MMP14/EGFR/LGALS3/IL4/SRC/HBB/PLG/CCL5/UMOD/CLDN1/IL1B/NOD2/HAVCR2/EPO/HMGB1/IL12RB1/TGFB2/PLAU/PTEN/DSP/IRF1/NLRP3/PKD1/TGM2/PTPN11/SMAD3/IFNA2/CSF1/CD36/CDH2/RHOA/CXCL8/SELE/MAPK14/GSN/SMAD7/CALR/…	118	BP
GO:0051254	positive regulation of RNA metabolic process	126/415	1532/17910	1.95584929746946e-38	8.21349827926381e-37	3.1286838632514e-37	EDN1/IGF1/EP300/MET/BRCA1/COL1A1/FOXP3/APOE/AIRE/TFR2/IRF3/IL5/AGT/HSPA8/TCF4/NFE2L2/NR1I3/BMP6/PPARGC1A/SNAI1/TNF/EGF/IL1A/CREBBP/SHH/TNFRSF1A/SPP1/WNT5A/BMP7/CTNNB1/ESR1/VEGFA/TGFB1/MYC/NKX2-1/SLC11A1/FOXO1/STAT1/MMP12/SMAD2/BRCA2/IL10/MAPK1/EGFR/IKBKB/CREB1/IL4/TERT/SRC/CXCL10/TP53/NFKB1/SIRT1/IL1B/NFKBIA/SREBF1/NOD2/TLR2/AGTR2/TWIST1/EPO/HGF/HMGB1/TGFB2/AXIN1/IRF1/NLRP3/PKD1/RXRA/NOS1/PKD2/SM…	126	BP
GO:0050708	regulation of protein secretion	71/415	456/17910	2.11625765697588e-38	8.83882613796719e-37	3.36688360643588e-37	IGF1/NOS2/LEP/FOXP3/APOE/GCK/IRF3/EZR/IL5/CRP/FN1/BMP6/TNF/IL1A/JAK2/WNT5A/AGER/TGFB1/IL13/TNFAIP3/MMP12/CCR7/CD14/HMGCR/INS/MMP8/IL10/EGFR/SRC/CCL5/LPL/IL1B/CPT1A/SREBF1/NOD2/TLR2/HAVCR2/AGTR2/TWIST1/HMGB1/TGFB2/NLRP3/PTPN11/IFNA2/IL17A/MAPK14/ATG5/CHUK/IL6/CD34/LYN/TGFB3/RBP4/IL2/IFNG/GLUL/TNFRSF1B/MAPK3/HNF4A/HIF1A/CFTR/NR1H4/TLR4/TLR9/MIF/APOA1/CCL3/KCNN4/CD274/PRKCA/CD40LG	71	BP
GO:0009306	protein secretion	77/415	549/17910	2.17342568341076e-38	9.02852777135767e-37	3.43914470871427e-37	IGF1/NOS2/LEP/FOXP3/APOE/GCK/IRF3/EZR/IL5/AGT/CRP/FN1/BMP6/TNF/IL1A/JAK2/WNT5A/AGER/TGFB1/IL13/TNFAIP3/MMP12/CCR7/CD14/HMGCR/INS/SMAD2/MMP8/IL10/EGFR/SRC/CCL5/LPL/IL1B/CPT1A/SREBF1/NOD2/TLR2/HAVCR2/AGTR2/TWIST1/HMGB1/TGFB2/NLRP3/PTPN11/IFNA2/CD36/MTTP/IL17A/MAPK14/RAF1/ATG5/CHUK/IL6/CD34/LYN/TGFB3/RBP4/IL2/IFNG/GLUL/TNFRSF1B/MAPK3/HNF4A/HIF1A/CFTR/NR1H4/TLR4/TLR9/CANX/MIF/APOA1/CCL3/KCNN4/CD274/P…	77	BP
GO:1903530	regulation of secretion by cell	86/415	703/17910	2.73826482439118e-38	1.13137447179819e-36	4.30962901903332e-37	EDN1/IGF1/NOS2/FGFR1/LEP/FOXP3/GNAS/APOE/GCK/TFR2/IRF3/EZR/IL5/AGT/CRP/FN1/BMP6/TNF/IL1A/JAK2/TNFRSF1A/SPP1/WNT5A/AGER/TGFB1/IL13/TNFAIP3/MMP12/CCR7/CD14/HMGCR/HMOX1/INS/MMP8/IL10/EGFR/CREB1/SRC/CCL5/LPL/IL1B/REN/CPT1A/SREBF1/NOD2/TLR2/HAVCR2/AGTR2/TWIST1/HMGB1/TGFB2/NLRP3/PTPN11/IFNA2/IL17A/MAPK14/ATG5/CHUK/AGTR1/SMAD4/IL6/CD34/LYN/TGFB3/RBP4/IL2/IFNG/CXCL12/GLUL/TNFRSF1B/MAPK3/HNF4A/HIF1A/CFTR/…	86	BP
GO:0051046	regulation of secretion	89/415	757/17910	2.75614440603723e-38	1.13267217970033e-36	4.31457224497018e-37	EDN1/IGF1/NOS2/FGFR1/LEP/FOXP3/GNAS/APOE/GCK/TFR2/IRF3/EZR/IL5/AGT/CRP/FN1/BMP6/TNF/EGF/IL1A/JAK2/TNFRSF1A/SPP1/WNT5A/AGER/TGFB1/IL13/TNFAIP3/MMP12/CCR7/CD14/HMGCR/HMOX1/INS/MMP8/IL10/EGFR/CREB1/SRC/CCL5/LPL/IL1B/REN/CPT1A/SREBF1/NOD2/TLR2/HAVCR2/AGTR2/TWIST1/HMGB1/TGFB2/NLRP3/PTPN11/IFNA2/IL17A/MAPK14/ATG5/CHUK/AGTR1/SMAD4/S100A8/ADA/IL6/CD34/LYN/TGFB3/RBP4/IL2/IFNG/CXCL12/GLUL/TNFRSF1B/MAPK3/HN…	89	BP
GO:0090087	regulation of peptide transport	86/415	706/17910	3.82090668583563e-38	1.56189722769398e-36	5.94957530420431e-37	IGF1/NOS2/LEP/FOXP3/APOE/GCK/TFR2/IRF3/EZR/IL5/HPS4/CRP/HSPA8/FN1/BMP6/TNF/IL1A/SHH/JAK2/WNT5A/PTGS2/AGER/TGFB1/IL13/TNFAIP3/MMP12/CCR7/CD14/HMGCR/INS/MMP8/IL10/MAPK1/MDM2/EGFR/SRC/CCL5/TP53/LPL/IL1B/CPT1A/SREBF1/NOD2/TLR2/HAVCR2/AGTR2/TWIST1/HMGB1/TGFB2/NLRP3/PTPN11/SMAD3/IFNA2/CD36/IL17A/MAPK14/ATG5/CHUK/S100A8/IL6/CD34/LYN/TGFB3/RBP4/IL2/CDH1/IFNG/GLUL/TNFRSF1B/MAPK3/CD81/HNF4A/HIF1A/CFTR/NR1H…	86	BP
GO:1901652	response to peptide	73/415	491/17910	4.21872034628105e-38	1.71538972810423e-36	6.53425858145787e-37	MMP2/EDN1/IGF1/LEP/COL1A1/PTK2/GCK/ASS1/AGT/GSTP1/NFE2L2/ABCC2/JAK2/PTGS2/BMP7/AGER/TGFB1/PCSK9/TNFAIP3/FOXO1/STAT1/GCLC/IGFBP5/MMP12/INS/BGLAP/MMP3/IL10/MDM2/CREB1/SRC/TP53/LPL/CAT/HADHA/NFKB1/SIRT1/IL1B/NFKBIA/SREBF1/NOD2/TLR2/AGTR2/PTEN/PTPN11/CD36/TSC2/PPARG/MTOR/MAPK14/VIM/CHUK/STAT3/ARG1/AGTR1/ADRB2/PPARA/LYN/IGF2/SP1/PIK3CA/CXCL12/ICAM1/CAV1/RELA/NR1H4/TLR4/VCAM1/INSR/AKT1/SPARC/MMP9/ADIPOQ	73	BP
GO:0022407	regulation of cell-cell adhesion	66/415	389/17910	4.71165694117077e-38	1.90574124173144e-36	7.25934512653513e-37	IGF1/LEP/ELANE/FOXP3/HSPD1/PTK2/ASS1/TNF/SHH/JAK2/SFTPD/WNT5A/BMP7/AGER/TGFB1/CCR7/PTPRC/IL10/LGALS3/IL4/SRC/PLG/CCL5/IL1B/NOD2/HAVCR2/EPO/HMGB1/IL12RB1/IRF1/NLRP3/PTPN11/IFNA2/RHOA/MAPK14/SMAD7/ARG1/TFRC/CCL2/ADA/IL6/CASP3/PPARA/LYN/IGF2/CD80/PIK3CA/IL2/CDH1/IFNG/CXCL12/ICAM1/CAV1/CD81/SH2B3/RELA/VCAM1/TGFBR2/AKT1/APOA1/IFNB1/CEBPB/CD274/PRKCA/CD40LG/ADIPOQ	66	BP
GO:0009056	catabolic process	156/415	2320/17910	6.53890194726472e-38	2.630966568834e-36	1.00218717637604e-36	MMP2/XDH/HSPB1/IGF1/EP300/MMP7/NOS2/MET/UGT1A1/LEP/CYP2D6/CYP2C19/ELANE/APOE/ALDH2/PTK2/BCL2/GPD1/GCK/ALAD/CYP1A1/EZR/HSPA8/NFE2L2/GAA/HP/PPARGC1A/CYP3A5/TNF/EGF/ITGB1/LDLR/SHH/SPP1/WNT5A/CBS/CTNNB1/CYP2C9/PSMB8/TGFB1/PCSK9/VCP/SLC11A1/TNFAIP3/FOXO1/GPT/MMP1/GCLC/MMP12/HMGCR/ANXA2/ABCD3/GGT1/HMOX1/INS/EXOC4/MMP3/PNPLA3/ACADM/MMP8/GSTM1/IL10/MMP14/MDM2/EGFR/IL4/AKR1D1/SCT/MAPK8/HADHB/SRC/HBB/TP53/…	156	BP
GO:0050727	regulation of inflammatory response	72/415	479/17910	6.75781009715623e-38	2.70488388524196e-36	1.03034374343155e-36	IGF1/NOS2/LEP/ELANE/FOXP3/APOE/C3/AGT/GSTP1/TNF/LDLR/JAK2/TNFRSF1A/F2/XIAP/WNT5A/PTGS2/AGER/ESR1/ACE2/TNFAIP3/CCR7/CR1/PTPRC/GGT1/INS/MMP3/MMP8/IL10/EGFR/SOD1/TLR7/IL4/CCL5/LPL/NFKB1/IL1B/NFKBIA/NOD2/TLR2/HGF/DNASE1/NLRP3/TGM2/SMAD3/LBP/PPARG/SELE/IL17A/MAPK14/VTN/AGTR1/S100A8/ADA/IL6/PPARA/LYN/PIK3CG/IL2/TNFRSF1B/CD81/RELA/TLR4/SERPINE1/TLR9/APOA1/LTA/CEBPB/CCL3/S100A9/MMP9/ADIPOQ	72	BP
GO:0051223	regulation of protein transport	84/415	677/17910	7.73527024815872e-38	3.08008040710361e-36	1.17326351568745e-36	IGF1/NOS2/LEP/FOXP3/APOE/GCK/IRF3/EZR/IL5/HPS4/CRP/HSPA8/FN1/BMP6/TNF/IL1A/SHH/JAK2/WNT5A/PTGS2/AGER/TGFB1/IL13/TNFAIP3/MMP12/CCR7/CD14/HMGCR/INS/MMP8/IL10/MAPK1/MDM2/EGFR/SRC/CCL5/TP53/LPL/IL1B/CPT1A/SREBF1/NOD2/TLR2/HAVCR2/AGTR2/TWIST1/HMGB1/TGFB2/NLRP3/PTPN11/SMAD3/IFNA2/CD36/IL17A/MAPK14/ATG5/CHUK/IL6/CD34/LYN/TGFB3/RBP4/IL2/CDH1/IFNG/GLUL/TNFRSF1B/MAPK3/CD81/HNF4A/HIF1A/CFTR/NR1H4/TLR4/TLR9/…	84	BP
GO:2000379	positive regulation of reactive oxygen species metabolic process	39/415	101/17910	1.14433589688811e-37	4.53310379772431e-36	1.72674884929238e-36	XDH/EDN1/LEP/ASS1/AGT/CRP/GSTP1/NFE2L2/PDGFRB/TNF/JAK2/F2/PTGS2/ACE2/TGFB1/MMP8/EGFR/SOD1/HBB/TP53/CDKN1A/IL1B/AGTR2/PKD2/SMAD3/CD36/MTOR/MAPK14/PDGFB/NOX4/AGTR1/PTX3/HSP90AA1/IFNG/ICAM1/TLR4/INSR/TGFBR2/AKT1	39	BP
GO:0045944	positive regulation of transcription by RNA polymerase II	102/415	1031/17910	2.05790042076793e-37	8.11023832492385e-36	3.08935010534715e-36	EDN1/IGF1/EP300/MET/BRCA1/FOXP3/AIRE/TFR2/IRF3/TCF4/NFE2L2/NR1I3/BMP6/PPARGC1A/TNF/IL1A/CREBBP/SHH/TNFRSF1A/WNT5A/BMP7/CTNNB1/ESR1/VEGFA/TGFB1/MYC/NKX2-1/SLC11A1/FOXO1/STAT1/MMP12/SMAD2/IL10/EGFR/IKBKB/CREB1/IL4/TERT/CXCL10/TP53/NFKB1/SIRT1/NFKBIA/SREBF1/NOD2/TLR2/TWIST1/HGF/HMGB1/TGFB2/IRF1/NLRP3/PKD1/RXRA/NOS1/PKD2/SMAD3/SLC40A1/STAT4/PPARG/NR3C1/IL17A/MAPK14/RAF1/SMAD7/PDGFB/CSF3/CHUK/NR1H2/ST…	102	BP
GO:0006979	response to oxidative stress	69/415	442/17910	2.2162918554083e-37	8.68989944327183e-36	3.31015448436653e-36	MMP2/EDN1/HSPB1/SOD2/MET/COL1A1/APOE/BCL2/ALAD/GSTP1/NFE2L2/HP/PPARGC1A/PDGFRB/TNF/ABCC2/JAK2/PTGS2/BMP7/CTNNB1/TNFAIP3/FOXO1/STAT1/GCLC/CCR7/HMOX1/INS/MMP3/IL10/MAPK1/MMP14/MDM2/EGFR/SOD1/MAPK8/SRC/HBB/TP53/CAT/IDH1/SIRT1/HGF/PKD2/EZH2/CD36/MPO/PCNA/CHUK/ARG1/NOX4/CYP2E1/ADA/IL6/CASP3/PRKAA2/FABP1/SP1/FOS/MAPK3/RELA/HIF1A/NOS3/TLR4/AKT1/LCN2/TXN/JUN/MMP9/ADIPOQ	69	BP
GO:0007568	aging	60/415	318/17910	2.54639084531255e-37	9.93350946508981e-36	3.78387012600278e-36	EDN1/MMP7/SOD2/LEP/BCL2/ASS1/CYP1A1/AGT/NFE2L2/PPARGC1A/PDGFRB/PTGS2/AGER/TYMS/TGFB1/GCLC/IGFBP5/HMGCR/BGLAP/BRCA2/IL10/MAPK1/SOD1/CREB1/TERT/TP53/CDKN1A/CAT/CLDN1/SIRT1/HAMP/SREBF1/TWIST1/EPO/PTEN/KRAS/MTOR/MAPK14/GSN/MPO/CALR/STAT3/ARG1/NOX4/ADA/ENG/TGFB3/FOS/ICAM1/TNFRSF1B/MAPK3/RELA/SERPINE1/VCAM1/TGFBR2/CANX/AKT1/MIF/CDKN2A/JUN	60	BP
GO:0044267	cellular protein metabolic process	235/415	4871/17910	2.77699909915856e-37	1.07784030692088e-35	4.10570680210523e-36	ABCA3/MMP2/XDH/EDN1/HSPB1/CXCR4/IGF1/EP300/NOS2/SEMA4D/FGFR1/MET/LEP/BRCA1/ELANE/DGUOK/FOXP3/BIRC5/APOE/AIRE/C3/HSPD1/PTK2/BCL2/TF/GUCY2C/ALAD/EZR/IL5/AGT/PKHD1/GSTP1/FN1/NFE2L2/BMP6/PPARGC1A/PDGFRB/TNF/EGF/CREBBP/LDLR/SHH/THPO/JAK2/TNFRSF1A/SPP1/SFTPD/F2/XIAP/WNT5A/PTGS2/BMP7/B2M/AGER/CTNNB1/CCND1/NOTCH2/ESR1/TYMS/PSMB8/VEGFA/TGFB1/MYC/PCSK9/VCP/IL13/SLC11A1/TNFAIP3/FOXO1/MMP1/GCLC/IGFBP5/CCR7/C…	235	BP
GO:0019216	regulation of lipid metabolic process	66/415	402/17910	3.89886534053991e-37	1.50566734382157e-35	5.73538456072017e-36	UGT1A1/LEP/BRCA1/APOE/C3/PTK2/CYP1A1/AGT/BMP6/PPARGC1A/SNAI1/PDGFRB/TNF/CREBBP/LDLR/TNFRSF1A/F2/PTGS2/TGFB1/CCR7/HMGCR/INS/ACADM/SOD1/CREB1/PDGFA/BBS4/SCT/SRC/IDH1/NFKB1/SIRT1/IL1B/CPT1A/SREBF1/NOD2/TWIST1/FASN/RXRA/APOC3/CD36/PPARG/MTOR/PDGFB/NR1H2/AGTR1/SCARB1/CPT2/VDR/PRKAA2/PPARA/UGT1A9/LYN/FABP1/PIK3CG/SP1/IFNG/FGF2/CAV1/ABCB4/CD81/HNF4A/NR1H4/AKT1/APOA1/ADIPOQ	66	BP
GO:0051130	positive regulation of cellular component organization	109/415	1189/17910	4.51860172906964e-37	1.73627271439501e-35	6.61380600449613e-36	EDN1/CXCR4/MPL/IGF1/EP300/SEMA4D/FGFR1/MET/BRCA1/FOXP3/APOE/C3/BCL2/TF/TFR2/IL5/AGT/HPS4/FN1/NFE2L2/PPARGC1A/PDGFRB/TNF/EGF/IL1A/SFTPD/WNT5A/BMP7/B2M/CTNNB1/ESR1/ACE2/VEGFA/TGFB1/PCSK9/VCP/SLC11A1/MMP1/CCR7/PTPRC/CD14/ANXA2/CCL11/INS/MMP3/TUBB2B/MAPK1/SOD1/CREB1/IL4/BBS4/MAPK8/SRC/TP53/CLDN1/SIRT1/IL1B/SREBF1/NME1/TWIST1/EPO/HGF/TGFB2/NOS1/SMAD3/EZH2/CD36/CASP8/PPARG/RHOA/SELE/MTOR/MAPK14/GSN/PDG…	109	BP
GO:0010038	response to metal ion	61/415	335/17910	5.27628922281678e-37	2.01732749638542e-35	7.68439922945979e-36	EDN1/BCL2/TF/ASS1/ALAD/TFR2/CYP1A1/NFE2L2/ATP7B/BMP6/PPARGC1A/IL1A/ABCC2/SHH/WNT5A/PTGS2/B2M/CCND1/GCLC/CD14/HMOX1/BGLAP/MAPK1/MDM2/EGFR/SOD1/CREB1/MAPK8/TERT/CAT/CPOX/CLDN1/HAMP/PTEN/PKD2/SLC40A1/TNFRSF11B/CASP8/SLC25A13/GSN/CALR/PCNA/CHUK/ARG1/S100A8/CASP3/PRKAA2/SLC11A2/CYP1A2/CDH1/FOS/HSPA5/ICAM1/CAV1/MAPK3/HIF1A/VCAM1/AKT1/SPARC/JUN/MMP9	61	BP
GO:0051338	regulation of transferase activity	95/415	902/17910	6.02754800973171e-37	2.2931537848905e-35	8.7350760891422e-36	EDN1/HSPB1/CXCR4/IGF1/FGFR1/LEP/ELANE/APOE/PTK2/AGT/GSTP1/PDGFRB/TNF/EGF/JAK2/F2/WNT5A/BMP7/AGER/CTNNB1/CCND1/VEGFA/TGFB1/MYC/SLC11A1/TNFAIP3/CCR7/PTPRC/HMGCR/EIF2AK2/INS/MAPK1/EGFR/SOD1/PDGFA/IL4/SRC/CXCL10/CCL5/TP53/CDKN1A/SIRT1/IL1B/NOD2/EPO/HGF/TGFB2/PTEN/AXIN1/PKD1/PKD2/PTPN11/EZH2/CSF1/TSC2/KRAS/PPARG/RHOA/CALCA/MTOR/MAPK14/RAF1/SMAD7/PDGFB/NOX4/ADRB2/DKC1/HSP90AA1/CASP3/ACE/LYN/TGFB3/IGF2/…	95	BP
GO:0045859	regulation of protein kinase activity	86/415	732/17910	6.37661230799535e-37	2.41400323088395e-35	9.19541551907444e-36	EDN1/HSPB1/CXCR4/IGF1/FGFR1/LEP/ELANE/APOE/PTK2/AGT/GSTP1/PDGFRB/TNF/EGF/JAK2/WNT5A/BMP7/AGER/CCND1/VEGFA/TGFB1/SLC11A1/TNFAIP3/CCR7/PTPRC/HMGCR/EIF2AK2/INS/MAPK1/EGFR/SOD1/PDGFA/IL4/SRC/CXCL10/CCL5/CDKN1A/SIRT1/IL1B/NOD2/EPO/HGF/TGFB2/PTEN/AXIN1/PKD1/PKD2/PTPN11/EZH2/CSF1/TSC2/KRAS/RHOA/CALCA/MTOR/MAPK14/RAF1/PDGFB/NOX4/ADRB2/HSP90AA1/CASP3/ACE/LYN/TGFB3/IGF2/PIK3CG/PIK3CA/IFNG/FGF2/CAV1/MAPK3/L…	86	BP
GO:0051347	positive regulation of transferase activity	79/415	609/17910	6.41283697434841e-37	2.41581628175821e-35	9.20232178826777e-36	EDN1/CXCR4/IGF1/FGFR1/LEP/ELANE/PTK2/AGT/PDGFRB/TNF/EGF/JAK2/F2/WNT5A/AGER/CTNNB1/CCND1/VEGFA/TGFB1/MYC/SLC11A1/CCR7/PTPRC/EIF2AK2/INS/MAPK1/EGFR/SOD1/PDGFA/IL4/SRC/CCL5/CDKN1A/SIRT1/IL1B/NOD2/EPO/HGF/TGFB2/PTEN/AXIN1/PKD1/PKD2/PTPN11/EZH2/CSF1/KRAS/RHOA/CALCA/MTOR/MAPK14/RAF1/PDGFB/NOX4/ADRB2/DKC1/HSP90AA1/ACE/LYN/TGFB3/IGF2/PIK3CG/PIK3CA/IL2/IFNG/FGF2/MAPK3/LTF/CD81/TLR4/INSR/TGFBR2/TLR9/NAF1/A…	79	BP
GO:0001568	blood vessel development	87/415	751/17910	6.86954335577858e-37	2.57524100922724e-35	9.80960209110153e-36	MMP2/XDH/EDN1/HSPB1/CXCR4/FGFR1/LEP/BRCA1/COL1A1/APOE/C3/PTK2/EDNRA/AGT/FN1/NFE2L2/PDGFRB/EGF/IL1A/ITGB1/LDLR/SHH/WNT5A/PTGS2/BMP7/CTNNB1/VEGFA/TGFB1/TNFAIP3/FOXO1/STAT1/ANXA2/CCL11/HMOX1/IL10/MAPK1/MMP14/MDM2/APOH/PDGFA/TERT/CXCL10/SIRT1/IL1B/TWIST1/COL1A2/HGF/TYMP/TGFB2/PTEN/PKD1/PKD2/CXCR2/PPARG/RHOA/CXCL8/MAPK14/SMAD7/PDGFB/STAT3/AGTR1/CCL2/IL6/CD34/COL3A1/ENG/PECAM1/PIK3CG/SP1/PIK3CA/DDIT3/F…	87	BP
GO:0009889	regulation of biosynthetic process	213/415	4135/17910	1.02065840887963e-36	3.80765042341745e-35	1.45040931788158e-35	EDN1/HSPB1/IGF1/EP300/SOD2/SEMA4D/FGFR1/MET/LEP/BRCA1/ELANE/COL1A1/FOXP3/BIRC5/APOE/AIRE/C3/HSPD1/BCL2/GPD1/GCK/ASS1/TFR2/IRF3/EZR/IL5/AGT/PKHD1/HSPA8/GSTP1/TCF4/NFE2L2/NR1I3/BMP6/PPARGC1A/SNAI1/PDGFRB/TNF/EGF/IL1A/CREBBP/LDLR/SHH/JAK2/TNFRSF1A/SPP1/SFTPD/F2/XIAP/WNT5A/PTGS2/BMP7/AGER/CTNNB1/CCND1/NOTCH2/ESR1/TYMS/PSMB8/VEGFA/TGFB1/MYC/NKX2-1/VCP/SLC11A1/TNFAIP3/FOXO1/STAT1/GCLC/IGFBP5/MMP12/CCR7…	213	BP
GO:0055082	cellular chemical homeostasis	82/415	666/17910	1.1701376678963e-36	4.34420675255222e-35	1.65479423057189e-35	EDN1/ELANE/APOE/BCL2/TF/EDNRA/TFR2/AGT/PKHD1/ATP7B/BMP6/PPARGC1A/ABCC2/JAK2/F2/WNT5A/AGER/ESR1/TGFB1/MYC/IL13/SLC11A1/FOXO1/GCLC/CCR7/PTPRC/HMGCR/ANXA2/CCL11/HMOX1/MAPK1/SOD1/SCT/GPR35/CXCL10/CCL5/SIRT1/ALAS2/HAMP/NME1/AGTR2/EPO/HMGB1/PKD1/TGM2/NOS1/PKD2/SMAD3/SLC40A1/CD36/CALCA/RAF1/CALR/ATG5/NOX4/AGTR1/SMAD4/TFRC/S100A8/VDR/PRKAA2/SLC11A2/LYN/PIK3CG/PIK3CA/IL2/DDIT3/FGF2/CXCL12/ICAM1/CAV1/MAPK3…	82	BP
GO:0002521	leukocyte differentiation	71/415	485/17910	1.3719258121242e-36	5.06887012796851e-35	1.93083283578816e-35	EP300/LEP/FOXP3/GNAS/BCL2/IL5/TNF/ITGB1/SHH/B2M/AGER/CTNNB1/NOTCH2/VEGFA/TGFB1/MYC/CCR7/CR1/PTPRC/ANXA2/BGLAP/IL10/MMP14/SOD1/CREB1/IL4/TP53/SIRT1/TLR2/NME1/HMGB1/IL12RB1/IRF1/NLRP3/FASN/IFNA2/CSF1/CASP8/PPARG/RHOA/IL17A/MTOR/MAPK14/SMAD7/CSF3/ATG5/STAT3/TFRC/ADA/IL6/LYN/CD80/IL2/FOS/IFNG/LTF/CD81/TLR4/VCAM1/TGFBR2/TLR9/IFNB1/CEBPB/CCL3/JUN/BAX/PRKCA/CD40LG/CSF2/MMP9/ADIPOQ	71	BP
GO:0001666	response to hypoxia	62/415	354/17910	1.41337031137883e-36	5.1970099727016e-35	1.97964383578168e-35	EDN1/CXCR4/MPL/EP300/NOS2/LEP/BCL2/ALAD/EDNRA/CYP1A1/NFE2L2/PPARGC1A/CREBBP/PTGS2/BMP7/AGER/PSMB8/VEGFA/TGFB1/MYC/HMOX1/MMP14/PLAT/MDM2/CREB1/TERT/SRC/TP53/CAT/SIRT1/ALAS2/TLR2/TWIST1/EPO/TGFB2/PLAU/PTEN/NOS1/MTHFR/SMAD3/RHOA/MTOR/RAF1/NOX4/SMAD4/ADA/CASP3/CD34/PPARA/TGFB3/FABP1/CXCL12/ICAM1/CAV1/HSP90B1/HIF1A/VCAM1/TGFBR2/AKT1/LTA/NOTCH1/ADIPOQ	62	BP
GO:0007155	cell adhesion	115/415	1338/17910	1.42419322389447e-36	5.21186901220427e-35	1.98530393766943e-35	HSPB1/CXCR4/MPL/IGF1/SEMA4D/LEP/ELANE/COL1A1/FOXP3/GNAS/HSPD1/PTK2/BCL2/ASS1/EZR/PKHD1/FN1/TNF/ITGB1/SHH/JAK2/SPP1/SFTPD/WNT5A/BMP7/AGER/CTNNB1/VEGFA/TGFB1/MMP12/CCR7/PTPRC/ANXA2/CCL11/BGLAP/IL10/MMP14/EGFR/LGALS3/IL4/SRC/HBB/PLG/CCL5/UMOD/CLDN1/IL1B/NOD2/HAVCR2/EPO/HMGB1/IL12RB1/TGFB2/PLAU/PTEN/DSP/IRF1/NLRP3/PKD1/TGM2/PTPN11/SMAD3/IFNA2/CSF1/CD36/CDH2/RHOA/CXCL8/SELE/MAPK14/GSN/SMAD7/CALR/ARG1/…	115	BP
GO:0000302	response to reactive oxygen species	52/415	230/17910	1.53171324281608e-36	5.57877548390595e-35	2.12506586593739e-35	MMP2/EDN1/SOD2/MET/COL1A1/APOE/BCL2/GSTP1/NFE2L2/HP/PPARGC1A/PDGFRB/TNF/BMP7/TNFAIP3/FOXO1/STAT1/CCR7/HMOX1/MMP3/IL10/MAPK1/MDM2/EGFR/SOD1/MAPK8/SRC/HBB/CAT/SIRT1/HGF/PKD2/EZH2/CD36/MPO/PCNA/CHUK/ARG1/CYP2E1/ADA/IL6/CASP3/FABP1/FOS/MAPK3/RELA/NOS3/AKT1/LCN2/TXN/JUN/MMP9	52	BP
GO:0048871	multicellular organismal homeostasis	70/415	472/17910	1.9289732210918e-36	6.99252792645777e-35	2.66359211909448e-35	HSPB1/CXCR4/MET/LEP/GNAS/BCL2/TF/BMP6/PPARGC1A/TNF/IL1A/JAK2/SFTPD/PTGS2/B2M/CTNNB1/SCNN1B/VEGFA/IL13/SLC11A1/TNFAIP3/FOXO1/SLC22A5/FH/BGLAP/EGFR/SOD1/IL4/BBS4/SRC/CLDN1/IL1B/ALB/HAMP/NOD2/SCNN1G/PTPN11/CSF1/SLC40A1/TNFRSF11B/CD36/KRAS/CALCA/NR1H2/STAT3/NOX4/ADRB2/TFRC/IL6/CPT2/CD34/PRKAA2/SLC11A2/RBP4/PIK3CA/DDIT3/CAV1/LTF/NOS3/CFTR/ACTB/TLR4/TLR9/SCNN1A/LCN2/CEBPB/NOTCH1/BAX/PRKCA/ADIPOQ	70	BP
GO:0044281	small molecule metabolic process	142/415	2012/17910	2.71075753357258e-36	9.78036227488509e-35	3.72553333376098e-35	XDH/EDN1/IGF1/EP300/NOS2/FGFR1/UGT1A1/LEP/BRCA1/CYP2D6/CYP2C19/DGUOK/APOE/ALDH2/C3/GPD1/GCK/ASS1/CYP1A1/HSPA8/GSTP1/GAA/BMP6/PPARGC1A/SNAI1/TNF/EGF/LDLR/ABCC2/TNFRSF1A/PTGS2/CBS/CYP2C9/TYMS/PSMB8/TGFB1/PCSK9/VCP/FOXO1/GPT/GCLC/IGFBP5/HMGCR/FH/ABCD3/GGT1/INS/PNPLA3/ASL/ACADM/MAPK1/SOD1/IL4/AKR1D1/CETP/HADHB/SRC/TP53/LPL/CAT/ABCB11/HADHA/IDH1/NFKB1/SIRT1/ABCC1/IL1B/AGXT/IGFBP3/CPT1A/SREBF1/TLR2/NME…	142	BP
GO:0010942	positive regulation of cell death	84/415	710/17910	2.90802874557921e-36	1.04430845372786e-34	3.97797734454293e-35	XDH/SOD2/LEP/HSPD1/BCL2/AGT/RARB/HP/PPARGC1A/PDGFRB/TNF/ITGB1/JAK2/TNFRSF1A/WNT5A/PTGS2/BMP7/CTNNB1/TGFB1/MYC/PCSK9/VCP/FOXO1/PTPRC/HMGCR/HMOX1/MMP3/IL10/SOD1/CREB1/MAPK8/SRC/HBB/CCL5/TP53/CDKN1A/SIRT1/IGFBP3/AGTR2/HMGB1/TGFB2/PTEN/NLRP3/TGM2/SMAD3/FAS/CD36/CXCR2/CASP8/PPARG/RHOA/MTOR/GSN/NOX4/S100A8/CCL2/IL6/CASP3/VDR/RBCK1/LYN/TGFB3/DDIT3/FOS/IFNG/TOP2A/CAV1/TNFRSF1B/TLR4/ATF6/AKT1/F3/LTA/IFNB1…	84	BP
GO:0001944	vasculature development	88/415	784/17910	2.98810236362259e-36	1.06807286811347e-34	4.06850069680999e-35	MMP2/XDH/EDN1/HSPB1/CXCR4/SOD2/FGFR1/LEP/BRCA1/COL1A1/APOE/C3/PTK2/EDNRA/AGT/FN1/NFE2L2/PDGFRB/EGF/IL1A/ITGB1/LDLR/SHH/WNT5A/PTGS2/BMP7/CTNNB1/VEGFA/TGFB1/TNFAIP3/FOXO1/STAT1/ANXA2/CCL11/HMOX1/IL10/MAPK1/MMP14/MDM2/APOH/PDGFA/TERT/CXCL10/SIRT1/IL1B/TWIST1/COL1A2/HGF/TYMP/TGFB2/PTEN/PKD1/PKD2/CXCR2/PPARG/RHOA/CXCL8/MAPK14/SMAD7/PDGFB/STAT3/AGTR1/CCL2/IL6/CD34/COL3A1/ENG/PECAM1/PIK3CG/SP1/PIK3CA/DD…	88	BP
GO:1901362	organic cyclic compound biosynthetic process	215/415	4239/17910	3.94461953531813e-36	1.40344449670925e-34	5.34599752812851e-35	XDH/EDN1/IGF1/EP300/SOD2/SEMA4D/FGFR1/MET/LEP/BRCA1/ELANE/COL1A1/DGUOK/FOXP3/BIRC5/APOE/AIRE/HSPD1/GPD1/GCK/ALAD/TFR2/IRF3/EZR/IL5/AGT/PKHD1/HSPA8/RARB/TCF4/NFE2L2/NR1I3/BMP6/PPARGC1A/SNAI1/PDGFRB/TNF/EGF/IL1A/CREBBP/NOP10/SHH/JAK2/TNFRSF1A/SPP1/XIAP/WNT5A/PTGS2/BMP7/AGER/CTNNB1/CCND1/NOTCH2/ESR1/TYMS/PSMB8/VEGFA/TGFB1/MYC/NKX2-1/VCP/SLC11A1/TNFAIP3/FOXO1/STAT1/GCLC/MMP12/HMGCR/EIF2AK2/HMOX1/INS/…	215	BP
GO:0033674	positive regulation of kinase activity	74/415	541/17910	4.12473441016821e-36	1.4607642369651e-34	5.56433975002561e-35	EDN1/CXCR4/IGF1/FGFR1/LEP/ELANE/PTK2/AGT/PDGFRB/TNF/EGF/JAK2/F2/WNT5A/AGER/CCND1/VEGFA/TGFB1/SLC11A1/CCR7/PTPRC/EIF2AK2/INS/MAPK1/EGFR/SOD1/PDGFA/IL4/SRC/CCL5/CDKN1A/SIRT1/IL1B/NOD2/EPO/HGF/TGFB2/AXIN1/PKD1/PKD2/PTPN11/EZH2/CSF1/KRAS/RHOA/CALCA/MTOR/MAPK14/RAF1/PDGFB/NOX4/ADRB2/HSP90AA1/ACE/LYN/TGFB3/IGF2/PIK3CG/PIK3CA/IL2/IFNG/FGF2/MAPK3/LTF/CD81/TLR4/INSR/TGFBR2/TLR9/AKT1/MIF/TXN/CD40LG/ADIPOQ	74	BP
GO:0072358	cardiovascular system development	88/415	792/17910	6.61428488836139e-36	2.33168712692923e-34	8.88185720643796e-35	MMP2/XDH/EDN1/HSPB1/CXCR4/SOD2/FGFR1/LEP/BRCA1/COL1A1/APOE/C3/PTK2/EDNRA/AGT/FN1/NFE2L2/PDGFRB/EGF/IL1A/ITGB1/LDLR/SHH/WNT5A/PTGS2/BMP7/CTNNB1/VEGFA/TGFB1/TNFAIP3/FOXO1/STAT1/ANXA2/CCL11/HMOX1/IL10/MAPK1/MMP14/MDM2/APOH/PDGFA/TERT/CXCL10/SIRT1/IL1B/TWIST1/COL1A2/HGF/TYMP/TGFB2/PTEN/PKD1/PKD2/CXCR2/PPARG/RHOA/CXCL8/MAPK14/SMAD7/PDGFB/STAT3/AGTR1/CCL2/IL6/CD34/COL3A1/ENG/PECAM1/PIK3CG/SP1/PIK3CA/DD…	88	BP
GO:0002366	leukocyte activation involved in immune response	82/415	684/17910	8.50545039179318e-36	2.98467517173199e-34	1.13692177551439e-34	ELANE/FOXP3/C3/HSPD1/ALAD/HSPA8/GSTP1/GAA/HP/B2M/NOTCH2/TGFB1/VCP/IL13/SLC11A1/CR1/PTPRC/CD14/ANXA2/HMOX1/CXCR1/MMP8/IL10/MAPK1/LGALS3/IL4/HBB/TP53/CAT/IDH1/NFKB1/TLR2/HAVCR2/HMGB1/DNASE1/IL12RB1/PLAU/DSP/ALOX5/NLRP3/CD36/LBP/CXCR2/RHOA/SERPINA1/MTOR/MAPK14/GSN/SMAD7/MPO/STAT3/ARG1/SLPI/CAMP/PTX3/TFRC/S100A8/ADA/IL6/HSP90AA1/PECAM1/TTR/LYN/PYGL/CD80/RNASE3/PIK3CG/IL2/IFNG/ICAM1/TNFRSF1B/LTF/CXCL1…	82	BP
GO:0036293	response to decreased oxygen levels	62/415	365/17910	9.07759940719383e-36	3.17097052019475e-34	1.2078853565266e-34	EDN1/CXCR4/MPL/EP300/NOS2/LEP/BCL2/ALAD/EDNRA/CYP1A1/NFE2L2/PPARGC1A/CREBBP/PTGS2/BMP7/AGER/PSMB8/VEGFA/TGFB1/MYC/HMOX1/MMP14/PLAT/MDM2/CREB1/TERT/SRC/TP53/CAT/SIRT1/ALAS2/TLR2/TWIST1/EPO/TGFB2/PLAU/PTEN/NOS1/MTHFR/SMAD3/RHOA/MTOR/RAF1/NOX4/SMAD4/ADA/CASP3/CD34/PPARA/TGFB3/FABP1/CXCL12/ICAM1/CAV1/HSP90B1/HIF1A/VCAM1/TGFBR2/AKT1/LTA/NOTCH1/ADIPOQ	62	BP
GO:0060429	epithelium development	110/415	1251/17910	9.31734661752835e-36	3.23999134641201e-34	1.23417675367213e-34	XDH/EDN1/CXCR4/EP300/FGFR1/MET/AIRE/BCL2/EDNRA/CYP1A1/EZR/AGT/RARB/BMP6/SNAI1/TNF/EGF/KRT8/SHH/JAK2/TNFRSF1A/WNT5A/BMP7/CTNNB1/CCND1/ESR1/TYMS/PSMB8/VEGFA/TGFB1/MYC/NKX2-1/IL13/STAT1/IGFBP5/MMP12/CCL11/SMAD2/BRCA2/IL10/MAPK1/MMP14/EGFR/IKBKB/SOD1/CREB1/LGALS3/PDGFA/BBS4/SRC/CXCL10/TP53/UMOD/CDKN1A/CAT/CLDN1/IL1B/CPT1A/AGTR2/TWIST1/HGF/TGFB2/PTEN/DSP/PKD1/FASN/TGM2/RXRA/PKD2/MTHFR/SMAD3/EZH2/CSF1/…	110	BP
GO:0045860	positive regulation of protein kinase activity	71/415	501/17910	1.20349193430174e-35	4.16614212392291e-34	1.58696589345336e-34	EDN1/CXCR4/IGF1/FGFR1/LEP/ELANE/PTK2/AGT/PDGFRB/TNF/EGF/JAK2/WNT5A/AGER/CCND1/VEGFA/TGFB1/SLC11A1/CCR7/PTPRC/EIF2AK2/INS/MAPK1/EGFR/SOD1/PDGFA/IL4/SRC/CCL5/CDKN1A/SIRT1/IL1B/NOD2/EPO/HGF/TGFB2/AXIN1/PKD1/PKD2/PTPN11/EZH2/CSF1/KRAS/RHOA/CALCA/MTOR/MAPK14/RAF1/PDGFB/NOX4/ADRB2/HSP90AA1/ACE/TGFB3/IGF2/PIK3CG/PIK3CA/IFNG/FGF2/MAPK3/LTF/CD81/TLR4/INSR/TGFBR2/TLR9/AKT1/MIF/TXN/CD40LG/ADIPOQ	71	BP
GO:0002263	cell activation involved in immune response	82/415	688/17910	1.30995742673064e-35	4.51436001095291e-34	1.71960897037428e-34	ELANE/FOXP3/C3/HSPD1/ALAD/HSPA8/GSTP1/GAA/HP/B2M/NOTCH2/TGFB1/VCP/IL13/SLC11A1/CR1/PTPRC/CD14/ANXA2/HMOX1/CXCR1/MMP8/IL10/MAPK1/LGALS3/IL4/HBB/TP53/CAT/IDH1/NFKB1/TLR2/HAVCR2/HMGB1/DNASE1/IL12RB1/PLAU/DSP/ALOX5/NLRP3/CD36/LBP/CXCR2/RHOA/SERPINA1/MTOR/MAPK14/GSN/SMAD7/MPO/STAT3/ARG1/SLPI/CAMP/PTX3/TFRC/S100A8/ADA/IL6/HSP90AA1/PECAM1/TTR/LYN/PYGL/CD80/RNASE3/PIK3CG/IL2/IFNG/ICAM1/TNFRSF1B/LTF/CXCL1…	82	BP
GO:0048646	anatomical structure formation involved in morphogenesis	104/415	1124/17910	1.33131552391741e-35	4.56748205415415e-34	1.73984420677365e-34	MMP2/EDN1/HSPB1/CXCR4/MPL/EP300/FGFR1/LEP/BRCA1/COL1A1/C3/PTK2/EDNRA/ACTC1/AGT/FN1/NFE2L2/SNAI1/PDGFRB/TNF/EGF/IL1A/ITGB1/KRT8/SHH/WNT5A/PTGS2/BMP7/CTNNB1/VEGFA/TGFB1/NKX2-1/TNFAIP3/FOXO1/STAT1/ANXA2/CCL11/HMOX1/EXOC4/SMAD2/MMP8/IL10/MAPK1/MMP14/APOH/PDGFA/BBS4/TERT/CXCL10/TP53/SIRT1/IL1B/TLR2/TWIST1/HGF/TYMP/TGFB2/PTEN/TGM2/NOS1/MTHFR/PTPN11/SMAD3/SLC40A1/CD36/CXCR2/TSC2/PPARG/RHOA/CXCL8/MAPK14/…	104	BP
GO:0043408	regulation of MAPK cascade	82/415	689/17910	1.45858638125293e-35	4.98188281774614e-34	1.89769764971434e-34	XDH/EDN1/CXCR4/IGF1/FGFR1/LEP/ELANE/APOE/EZR/PKHD1/GSTP1/FN1/PDGFRB/TNF/EGF/THPO/JAK2/WNT5A/BMP7/AGER/CTNNB1/NOTCH2/VEGFA/TGFB1/MYC/FOXO1/CCR7/PTPRC/HMGCR/EIF2AK2/INS/MMP8/MAPK1/EGFR/SOD1/PDGFA/SRC/IL1B/REN/IGFBP3/NOD2/HAVCR2/EPO/HGF/HMGB1/TGFB2/PTEN/AXIN1/PTPN11/EZH2/FAS/CD36/CDH2/KRAS/MAPK14/RAF1/PDGFB/NOX4/ADRB2/SMAD4/IL6/LYN/TGFB3/IGF2/PIK3CG/FGF2/ICAM1/CAV1/MAPK3/CD81/SH2B3/TLR4/INSR/TLR9/AK…	82	BP
GO:0051090	regulation of DNA-binding transcription factor activity	66/415	429/17910	2.42792680740703e-35	8.25602544908098e-34	3.14488330293384e-34	EDN1/EP300/FOXP3/IL5/AGT/PKHD1/PPARGC1A/TNF/SHH/JAK2/WNT5A/BMP7/AGER/CTNNB1/ESR1/VEGFA/TGFB1/TNFAIP3/EIF2AK2/HMOX1/INS/IL10/MAPK1/IKBKB/MAPK8/CAT/NFKB1/SIRT1/IL1B/NFKBIA/NOD2/TLR2/HAVCR2/TWIST1/PTEN/NLRP3/PKD1/PKD2/SMAD3/EZH2/CD36/KRAS/PPARG/MAPK14/SMAD7/CSF3/CHUK/STAT3/S100A8/IL6/RBCK1/DDIT3/FOS/ICAM1/CAV1/MAPK3/LTF/RELA/NR1H4/TLR4/TLR9/AKT1/CDKN2A/JUN/CD40LG/S100A9	66	BP
GO:0001101	response to acid chemical	59/415	330/17910	2.50106132792348e-35	8.46724947360877e-34	3.22534270946218e-34	MMP2/EDN1/LEP/COL1A1/ASS1/ALAD/GSTP1/BMP6/PPARGC1A/PDGFRB/TNF/LDLR/ABCC2/KRT8/WNT5A/PTGS2/TYMS/VEGFA/FOXO1/GCLC/CCR7/EGFR/CREB1/SRC/LPL/CAT/CLDN1/CPT1A/HAMP/SREBF1/TLR2/NME1/COL1A2/RXRA/PKD2/MTHFR/CD36/PPARG/RHOA/MTOR/GSN/PDGFB/PCNA/CHUK/ARG1/CYP2E1/CASP3/COL3A1/PRKAA2/LYN/RBP4/ICAM1/ABCB4/RELA/NR1H4/AKT1/SPARC/CEBPB/ADIPOQ	59	BP
GO:0043549	regulation of kinase activity	88/415	807/17910	2.85567153822077e-35	9.62536656632747e-34	3.66649240433609e-34	EDN1/HSPB1/CXCR4/IGF1/FGFR1/LEP/ELANE/APOE/PTK2/AGT/GSTP1/PDGFRB/TNF/EGF/JAK2/F2/WNT5A/BMP7/AGER/CCND1/VEGFA/TGFB1/SLC11A1/TNFAIP3/CCR7/PTPRC/HMGCR/EIF2AK2/INS/MAPK1/EGFR/SOD1/PDGFA/IL4/SRC/CXCL10/CCL5/CDKN1A/SIRT1/IL1B/NOD2/EPO/HGF/TGFB2/PTEN/AXIN1/PKD1/PKD2/PTPN11/EZH2/CSF1/TSC2/KRAS/RHOA/CALCA/MTOR/MAPK14/RAF1/PDGFB/NOX4/ADRB2/HSP90AA1/CASP3/ACE/LYN/TGFB3/IGF2/PIK3CG/PIK3CA/IL2/IFNG/FGF2/CAV1/…	88	BP
GO:0002694	regulation of leukocyte activation	70/415	492/17910	2.99370675738144e-35	1.00465661268456e-33	3.82693564342807e-34	MPL/IGF1/LEP/FOXP3/HSPD1/BCL2/IL5/TNF/LDLR/SHH/SFTPD/WNT5A/AGER/CTNNB1/TGFB1/IL13/TNFAIP3/CCR7/CR1/PTPRC/HMOX1/MMP8/IL10/MMP14/SOD1/LGALS3/IL4/SRC/CCL5/CDKN1A/IL1B/NOD2/HAVCR2/EPO/HMGB1/IL12RB1/IRF1/NLRP3/PTPN11/IFNA2/LBP/RHOA/GSN/SMAD7/ARG1/TFRC/CCL2/ADA/IL6/CASP3/LYN/IGF2/CD80/PIK3CA/IL2/IFNG/CAV1/TNFRSF1B/CD81/TLR4/VCAM1/TGFBR2/TLR9/AKT1/MIF/IFNB1/CEBPB/CCL3/CD274/CD40LG	70	BP
GO:0009887	animal organ morphogenesis	97/415	989/17910	3.72389248745108e-35	1.24426581591572e-33	4.73965446572149e-34	MMP2/EDN1/EP300/FGFR1/COL1A1/GNAS/PTK2/BCL2/ACTC1/AGT/RARB/GAA/BMP6/SNAI1/PDGFRB/TNF/SHH/WNT5A/BMP7/CTNNB1/NOTCH2/ESR1/PSMB8/VEGFA/TGFB1/MYC/NKX2-1/TNFAIP3/FOXO1/STAT1/IGFBP5/CCL11/EXOC4/SMAD2/BGLAP/MAPK1/MMP14/MDM2/EGFR/SOD1/PDGFA/BBS4/BMP1/SRC/TP53/AGTR2/TWIST1/COL1A2/HGF/TGFB2/PTEN/DSP/PKD1/TGM2/RXRA/PKD2/SMAD3/CSF1/SLC40A1/TNFRSF11B/CDH2/KRAS/RHOA/MTOR/MAPK14/SMAD7/ELN/STAT3/ARG1/SMAD4/CCL2/V…	97	BP
GO:0031983	vesicle lumen	59/415	339/18675	1.27280718684819e-35	1.34281158212484e-33	7.61451317044271e-34	IGF1/ELANE/APOE/C3/TF/ALAD/HSPA8/GSTP1/FN1/HP/EGF/B2M/VEGFA/TGFB1/VCP/ANXA2/INS/MMP8/MAPK1/EGFR/APOH/PDGFA/HBB/PLG/CAT/IDH1/NFKB1/ALB/HGF/HMGB1/TGFB2/ALOX5/SERPINA1/MAPK14/GSN/MPO/PDGFB/CALR/ARG1/SLPI/CAMP/PTX3/S100A8/ADA/HSP90AA1/TTR/TGFB3/IGF2/PYGL/RNASE3/LTF/HSP90B1/CXCL1/SERPINE1/MIF/LCN2/SPARC/APOA1/S100A9	59	CC
GO:0046649	lymphocyte activation	78/415	630/17910	5.39822171885032e-35	1.7959019008383e-33	6.84094536346445e-34	MPL/IGF1/EP300/LEP/FOXP3/HSPD1/BCL2/IL5/ITGB1/SHH/SFTPD/B2M/AGER/CTNNB1/NOTCH2/TGFB1/IL13/SLC11A1/TNFAIP3/CCR7/CR1/PTPRC/INS/IL10/MMP14/SOD1/LGALS3/IL4/SRC/CCL5/TP53/CDKN1A/IL1B/NOD2/HAVCR2/EPO/HMGB1/IL12RB1/IRF1/NLRP3/PTPN11/SMAD3/IFNA2/CASP8/RHOA/MTOR/GSN/SMAD7/ATG5/STAT3/ARG1/TFRC/CCL2/ADA/IL6/CASP3/LYN/IGF2/CD80/PIK3CG/PIK3CA/IL2/IFNG/ICAM1/CAV1/TNFRSF1B/CD81/TLR4/VCAM1/TGFBR2/TLR9/AKT1/MIF/I…	78	BP
GO:0023057	negative regulation of signaling	114/415	1368/17910	5.90033842414141e-35	1.95448710299684e-33	7.44502774842888e-34	XDH/EDN1/HSPB1/IGF1/SOD2/MET/LEP/BRCA1/APOE/BCL2/EZR/AGT/PKHD1/GSTP1/NFE2L2/SNAI1/TNF/EGF/IL1A/ITGB1/SHH/WNT5A/PTGS2/BMP7/AGER/CTNNB1/ESR1/PSMB8/TGFB1/MYC/PCSK9/NKX2-1/TNFAIP3/FOXO1/STAT1/GCLC/IGFBP5/MMP12/PTPRC/CD14/HMGCR/HMOX1/INS/SMAD2/MMP14/MDM2/EGFR/LGALS3/GPR35/TERT/SRC/CCL5/TP53/SIRT1/IL1B/NFKBIA/IGFBP3/SREBF1/AGTR2/TWIST1/EPO/HGF/TGFB2/PTEN/AXIN1/NLRP3/PKD2/PTPN11/SMAD3/EZH2/FAS/CASP8/TSC…	114	BP
GO:0007584	response to nutrient	49/415	215/17910	1.22840146631365e-34	4.05161599511605e-33	1.54334062697911e-33	UGT1A1/LEP/COL1A1/ASS1/ALAD/CYP1A1/GSTP1/SPP1/PTGS2/BMP7/CCND1/TYMS/TGFB1/STAT1/GCLC/HMGCR/HMOX1/BGLAP/MDM2/EGFR/SOD1/CREB1/CXCL10/LPL/CAT/IL1B/HAMP/NOD2/EPO/PTEN/MTHFR/TNFRSF11B/PPARG/MTOR/GSN/PCNA/ARG1/ADA/VDR/HSP90B1/RELA/NR1H4/VCAM1/TGFBR2/SPARC/SERPINC1/APOA1/LTA/ADIPOQ	49	BP
GO:0031326	regulation of cellular biosynthetic process	207/415	4060/17910	1.30421946167628e-34	4.28330194999238e-33	1.63159438727923e-33	EDN1/HSPB1/IGF1/EP300/SOD2/SEMA4D/FGFR1/MET/LEP/BRCA1/ELANE/COL1A1/FOXP3/BIRC5/APOE/AIRE/C3/HSPD1/BCL2/GPD1/GCK/ASS1/TFR2/IRF3/EZR/IL5/AGT/PKHD1/HSPA8/TCF4/NFE2L2/NR1I3/BMP6/PPARGC1A/SNAI1/PDGFRB/TNF/EGF/IL1A/CREBBP/LDLR/SHH/JAK2/TNFRSF1A/SPP1/SFTPD/XIAP/WNT5A/PTGS2/BMP7/AGER/CTNNB1/CCND1/NOTCH2/ESR1/TYMS/PSMB8/VEGFA/TGFB1/MYC/NKX2-1/VCP/SLC11A1/TNFAIP3/FOXO1/STAT1/GCLC/IGFBP5/MMP12/CCR7/PTPRC/EI…	207	BP
GO:0043412	macromolecule modification	206/415	4027/17910	1.34369574528872e-34	4.39417097980587e-33	1.67382659245148e-33	XDH/EDN1/HSPB1/CXCR4/IGF1/EP300/NOS2/SEMA4D/FGFR1/MET/LEP/BRCA1/ELANE/DGUOK/FOXP3/BIRC5/GNAS/APOE/C3/PTK2/BCL2/TF/GUCY2C/EZR/IL5/AGT/PKHD1/GSTP1/FN1/NFE2L2/BMP6/PPARGC1A/PDGFRB/TNF/EGF/CREBBP/NOP10/THPO/JAK2/TNFRSF1A/SPP1/F2/XIAP/WNT5A/PTGS2/BMP7/AGER/CTNNB1/CCND1/NOTCH2/ESR1/PSMB8/VEGFA/TGFB1/MYC/PCSK9/VCP/IL13/SLC11A1/TNFAIP3/FOXO1/GCLC/IGFBP5/CCR7/PTPRC/HMGCR/EIF2AK2/CCL11/INS/SMAD2/BRCA2/MMP8…	206	BP
GO:0042330	taxis	73/415	553/17910	1.43372622786264e-34	4.66872290725609e-33	1.77840884910169e-33	EDN1/HSPB1/CXCR4/EP300/FGFR1/MET/ELANE/PTK2/EZR/GSTP1/PDGFRB/SHH/SFTPD/WNT5A/BMP7/AGER/VEGFA/TGFB1/NKX2-1/CCR7/CCL11/TUBB2B/CXCR1/IL10/MAPK1/CXCL2/CREB1/LGALS3/PDGFA/SRC/CXCL10/CCL5/ABCC1/HGF/TYMP/HMGB1/TGFB2/PLAU/PTPN11/SMAD3/CSF1/LBP/CXCR2/TSC2/RHOA/CALCA/CXCL8/MAPK14/PDGFB/CALR/AGTR1/SMAD4/TUBB3/S100A8/CCL2/IL6/LYN/PIK3CG/FGF7/PIK3CA/FGF2/CXCL12/MAPK3/CXCL1/SERPINE1/VCAM1/MIF/F3/APOA1/CCL3/NOT…	73	BP
GO:0019438	aromatic compound biosynthetic process	208/415	4099/17910	1.57620258426916e-34	5.11101977219767e-33	1.946888468511e-33	XDH/EDN1/IGF1/EP300/SOD2/SEMA4D/FGFR1/MET/LEP/BRCA1/ELANE/COL1A1/DGUOK/FOXP3/BIRC5/APOE/AIRE/HSPD1/GPD1/GCK/ALAD/TFR2/IRF3/EZR/IL5/AGT/PKHD1/HSPA8/RARB/TCF4/NFE2L2/NR1I3/BMP6/PPARGC1A/SNAI1/PDGFRB/TNF/EGF/IL1A/CREBBP/NOP10/SHH/JAK2/TNFRSF1A/SPP1/XIAP/WNT5A/PTGS2/BMP7/AGER/CTNNB1/CCND1/NOTCH2/ESR1/TYMS/PSMB8/VEGFA/TGFB1/MYC/NKX2-1/VCP/SLC11A1/TNFAIP3/FOXO1/STAT1/GCLC/MMP12/EIF2AK2/HMOX1/INS/SMAD2/…	208	BP
GO:0006629	lipid metabolic process	112/415	1338/17910	1.81215497057854e-34	5.85143317180508e-33	2.22892656929629e-33	EDN1/FGFR1/UGT1A1/LEP/BRCA1/CYP2D6/CYP2C19/APOE/C3/PTK2/GPD1/CYP1A1/AGT/GSTP1/BMP6/PPARGC1A/SNAI1/CYP3A5/PDGFRB/TNF/CREBBP/LDLR/SHH/TNFRSF1A/SPP1/F2/PTGS2/CYP2C9/ESR1/TGFB1/PCSK9/NKX2-1/CCR7/HMGCR/ABCD3/GGT1/INS/PNPLA3/ACADM/EGFR/SOD1/APOH/CREB1/PDGFA/IL4/BBS4/AKR1D1/SCT/CETP/HADHB/SRC/LPL/CAT/ABCB11/HADHA/IDH1/NFKB1/SIRT1/IL1B/CPT1A/SREBF1/NOD2/TWIST1/PTEN/ALOX5/FASN/RXRA/PTPN11/APOC3/CD36/PPARG…	112	BP
GO:0042110	T cell activation	66/415	443/17910	1.8261528179473e-34	5.87196000247909e-33	2.23674564488503e-33	IGF1/LEP/FOXP3/HSPD1/BCL2/SHH/SFTPD/B2M/AGER/CTNNB1/TGFB1/SLC11A1/CCR7/CR1/PTPRC/INS/IL10/SOD1/LGALS3/IL4/SRC/CCL5/TP53/IL1B/NOD2/HAVCR2/EPO/HMGB1/IL12RB1/IRF1/NLRP3/PTPN11/SMAD3/IFNA2/CASP8/RHOA/MTOR/GSN/SMAD7/ATG5/STAT3/ARG1/TFRC/CCL2/ADA/IL6/CASP3/LYN/IGF2/CD80/PIK3CG/PIK3CA/IL2/IFNG/ICAM1/CAV1/TNFRSF1B/CD81/VCAM1/TGFBR2/AKT1/IFNB1/CEBPB/CD274/BAX/CD40LG	66	BP
GO:0010648	negative regulation of cell communication	113/415	1364/17910	2.20213189861431e-34	7.05140985035457e-33	2.68602140791509e-33	XDH/EDN1/HSPB1/IGF1/SOD2/MET/LEP/BRCA1/APOE/BCL2/EZR/AGT/PKHD1/GSTP1/NFE2L2/SNAI1/TNF/EGF/IL1A/ITGB1/SHH/WNT5A/PTGS2/BMP7/AGER/CTNNB1/ESR1/PSMB8/TGFB1/MYC/NKX2-1/TNFAIP3/FOXO1/STAT1/GCLC/IGFBP5/MMP12/PTPRC/CD14/HMGCR/HMOX1/INS/SMAD2/MMP14/MDM2/EGFR/LGALS3/GPR35/TERT/SRC/CCL5/TP53/SIRT1/IL1B/NFKBIA/IGFBP3/SREBF1/AGTR2/TWIST1/EPO/HGF/TGFB2/PTEN/AXIN1/NLRP3/PKD2/PTPN11/SMAD3/EZH2/FAS/CASP8/TSC2/CDH2…	113	BP
GO:0044419	interspecies interaction between organisms	93/415	928/17910	2.2139512189186e-34	7.05984029767196e-33	2.68923273195572e-33	CXCR4/EP300/NOS2/MET/ELANE/APOE/HSPD1/BCL2/IRF3/HSPA8/FN1/NFE2L2/TNF/CREBBP/ITGB1/LDLR/KRT8/TNFRSF1A/SFTPD/F2/B2M/CTNNB1/ACE2/TYMS/PSMB8/TGFB1/MRC1/VCP/MMP1/STAT1/CR1/SLC22A5/ANXA2/EIF2AK2/SLC10A1/IL10/MAPK1/MDM2/EGFR/IKBKB/CREB1/SRC/PLG/CCL5/TP53/CLDN1/SIRT1/NFKBIA/HAMP/RXRA/SMAD3/IFNA2/CD36/LBP/CASP8/TSC2/RHOA/CXCL8/GSN/MPO/VIM/PCNA/ATG5/STAT3/ARG1/SLPI/CAMP/PTX3/SCARB1/TFRC/CCL2/RBCK1/LYN/CD80…	93	BP
GO:0051249	regulation of lymphocyte activation	63/415	401/17910	2.80651726475944e-34	8.91243189242823e-33	3.39492149338669e-33	MPL/IGF1/LEP/FOXP3/HSPD1/BCL2/IL5/SHH/SFTPD/AGER/CTNNB1/TGFB1/IL13/TNFAIP3/CCR7/CR1/PTPRC/IL10/MMP14/SOD1/LGALS3/IL4/SRC/CCL5/CDKN1A/IL1B/NOD2/HAVCR2/EPO/HMGB1/IL12RB1/IRF1/NLRP3/PTPN11/IFNA2/RHOA/GSN/SMAD7/ARG1/TFRC/CCL2/ADA/IL6/CASP3/LYN/IGF2/CD80/PIK3CA/IL2/IFNG/CAV1/TNFRSF1B/CD81/TLR4/VCAM1/TGFBR2/TLR9/AKT1/MIF/IFNB1/CEBPB/CD274/CD40LG	63	BP
GO:0033554	cellular response to stress	135/415	1914/17910	3.21682812349044e-34	1.01733844152362e-32	3.87524323648556e-33	MMP2/XDH/EDN1/HSPB1/MPL/EP300/SOD2/MET/LEP/BRCA1/BCL2/ASS1/IRF3/EZR/AGT/HSPA8/GSTP1/NFE2L2/PPARGC1A/SNAI1/TNF/IL1A/CREBBP/JAK2/TNFRSF1A/SPP1/XIAP/WNT5A/PTGS2/BMP7/AGER/CBS/CTNNB1/CCND1/PSMB8/VEGFA/MYC/PCSK9/VCP/TNFAIP3/FOXO1/CCR7/HMGCR/EIF2AK2/HMOX1/INS/MMP3/BRCA2/MMP8/GSTM1/IL10/MAPK1/MDM2/EGFR/IKBKB/SOD1/MAPK8/TERT/SRC/POLE/CXCL10/TP53/CDKN1A/CAT/NFKB1/SIRT1/IL1B/NFKBIA/ALB/SREBF1/NOD2/TWIST1/E…	135	BP
GO:0060205	cytoplasmic vesicle lumen	58/415	338/18675	1.14010759307206e-34	1.03098300916374e-32	5.84626600357252e-33	IGF1/ELANE/APOE/C3/TF/ALAD/HSPA8/GSTP1/FN1/HP/EGF/B2M/VEGFA/TGFB1/VCP/ANXA2/INS/MMP8/MAPK1/APOH/PDGFA/HBB/PLG/CAT/IDH1/NFKB1/ALB/HGF/HMGB1/TGFB2/ALOX5/SERPINA1/MAPK14/GSN/MPO/PDGFB/CALR/ARG1/SLPI/CAMP/PTX3/S100A8/ADA/HSP90AA1/TTR/TGFB3/IGF2/PYGL/RNASE3/LTF/HSP90B1/CXCL1/SERPINE1/MIF/LCN2/SPARC/APOA1/S100A9	58	CC
GO:0006464	cellular protein modification process	200/415	3851/17910	3.44500183191955e-34	1.08060567666538e-32	4.1162406421346e-33	XDH/EDN1/HSPB1/CXCR4/IGF1/EP300/NOS2/SEMA4D/FGFR1/MET/LEP/BRCA1/ELANE/DGUOK/FOXP3/BIRC5/APOE/C3/PTK2/BCL2/TF/GUCY2C/EZR/IL5/AGT/PKHD1/GSTP1/FN1/NFE2L2/BMP6/PPARGC1A/PDGFRB/TNF/EGF/CREBBP/THPO/JAK2/TNFRSF1A/SPP1/F2/XIAP/WNT5A/PTGS2/BMP7/AGER/CTNNB1/CCND1/NOTCH2/ESR1/PSMB8/VEGFA/TGFB1/MYC/PCSK9/VCP/IL13/SLC11A1/TNFAIP3/FOXO1/GCLC/IGFBP5/CCR7/PTPRC/HMGCR/EIF2AK2/CCL11/INS/SMAD2/BRCA2/MMP8/MAPK1/PLAT…	200	BP
GO:0036211	protein modification process	200/415	3851/17910	3.44500183191955e-34	1.08060567666538e-32	4.1162406421346e-33	XDH/EDN1/HSPB1/CXCR4/IGF1/EP300/NOS2/SEMA4D/FGFR1/MET/LEP/BRCA1/ELANE/DGUOK/FOXP3/BIRC5/APOE/C3/PTK2/BCL2/TF/GUCY2C/EZR/IL5/AGT/PKHD1/GSTP1/FN1/NFE2L2/BMP6/PPARGC1A/PDGFRB/TNF/EGF/CREBBP/THPO/JAK2/TNFRSF1A/SPP1/F2/XIAP/WNT5A/PTGS2/BMP7/AGER/CTNNB1/CCND1/NOTCH2/ESR1/PSMB8/VEGFA/TGFB1/MYC/PCSK9/VCP/IL13/SLC11A1/TNFAIP3/FOXO1/GCLC/IGFBP5/CCR7/PTPRC/HMGCR/EIF2AK2/CCL11/INS/SMAD2/BRCA2/MMP8/MAPK1/PLAT…	200	BP
GO:0018130	heterocycle biosynthetic process	207/415	4089/17910	3.82658405068811e-34	1.19541863534708e-32	4.55358589857237e-33	XDH/EDN1/IGF1/EP300/SOD2/SEMA4D/FGFR1/MET/LEP/BRCA1/ELANE/COL1A1/DGUOK/FOXP3/BIRC5/APOE/AIRE/HSPD1/GPD1/GCK/ALAD/TFR2/IRF3/EZR/IL5/AGT/PKHD1/HSPA8/RARB/TCF4/NFE2L2/NR1I3/BMP6/PPARGC1A/SNAI1/PDGFRB/TNF/EGF/IL1A/CREBBP/NOP10/SHH/JAK2/TNFRSF1A/SPP1/XIAP/WNT5A/PTGS2/BMP7/AGER/CTNNB1/CCND1/NOTCH2/ESR1/TYMS/PSMB8/VEGFA/TGFB1/MYC/NKX2-1/VCP/SLC11A1/TNFAIP3/FOXO1/STAT1/GCLC/MMP12/EIF2AK2/HMOX1/INS/SMAD2/…	207	BP
GO:0071496	cellular response to external stimulus	57/415	320/17910	4.79673000046368e-34	1.49242388880823e-32	5.68493762253973e-33	MMP7/LEP/COL1A1/BCL2/AGT/HSPA8/GSTP1/NFE2L2/BMP6/TNFRSF1A/PTGS2/CBS/TGFB1/PCSK9/IL13/FOXO1/GCLC/PTPRC/EIF2AK2/HMOX1/BGLAP/MAPK1/MDM2/EGFR/SOD1/TLR7/MAPK8/TP53/CDKN1A/LPL/NFKB1/SIRT1/IL1B/ALB/SREBF1/IRF1/PTPN11/FAS/CASP8/PPARG/MTOR/VDR/ENG/PRKAA2/LYN/FOS/HSPA5/GLUL/ICAM1/MAPK3/HSP90B1/NR1H4/TLR4/VCAM1/AKT1/LCN2/JUN	57	BP
GO:0055065	metal ion homeostasis	71/415	531/17910	5.64627270547321e-34	1.74966152183716e-32	6.66480661881197e-33	EDN1/ELANE/APOE/BCL2/TF/EDNRA/TFR2/AGT/PKHD1/ATP7B/BMP6/JAK2/F2/XIAP/WNT5A/B2M/ESR1/SCNN1B/TGFB1/MYC/IL13/SLC11A1/CCR7/PTPRC/ANXA2/CCL11/HMOX1/EGFR/SOD1/GPR35/CXCL10/CCL5/ALAS2/HAMP/SCNN1G/AGTR2/EPO/HMGB1/PKD1/TGM2/NOS1/PKD2/SMAD3/SLC40A1/CD36/CALCA/STEAP4/CALR/ATG5/AGTR1/SMAD4/TFRC/S100A8/VDR/SLC11A2/LYN/PIK3CG/IL2/DDIT3/FGF2/CXCL12/CAV1/LTF/HSP90B1/HIF1A/SCNN1A/LCN2/CCL3/BAX/CP/S100A9	71	BP
GO:1903037	regulation of leukocyte cell-cell adhesion	55/415	295/17910	6.11336785145249e-34	1.88679646339006e-32	7.18718072073109e-33	IGF1/LEP/ELANE/FOXP3/HSPD1/ASS1/TNF/SHH/SFTPD/AGER/TGFB1/CCR7/PTPRC/IL10/LGALS3/IL4/SRC/CCL5/IL1B/NOD2/HAVCR2/EPO/HMGB1/IL12RB1/IRF1/NLRP3/PTPN11/IFNA2/RHOA/SMAD7/ARG1/TFRC/CCL2/ADA/IL6/CASP3/PPARA/LYN/IGF2/CD80/PIK3CA/IL2/IFNG/CXCL12/ICAM1/CAV1/CD81/RELA/VCAM1/TGFBR2/AKT1/IFNB1/CEBPB/CD274/CD40LG	55	BP
GO:0098771	inorganic ion homeostasis	75/415	600/17910	6.64427341799368e-34	2.04244964869126e-32	7.78009447386965e-33	EDN1/ELANE/APOE/BCL2/TF/EDNRA/TFR2/AGT/PKHD1/ATP7B/BMP6/ABCC2/JAK2/F2/XIAP/WNT5A/B2M/ESR1/SCNN1B/TGFB1/MYC/IL13/SLC11A1/CCR7/PTPRC/ANXA2/CCL11/HMOX1/MAPK1/EGFR/SOD1/GPR35/CXCL10/CCL5/ALAS2/HAMP/SCNN1G/AGTR2/EPO/HMGB1/PKD1/TGM2/NOS1/PKD2/SMAD3/SLC40A1/CD36/CALCA/STEAP4/CALR/ATG5/AGTR1/SMAD4/TFRC/S100A8/VDR/SLC11A2/LYN/PIK3CG/IL2/DDIT3/FGF2/CXCL12/CAV1/MAPK3/LTF/HSP90B1/HIF1A/CFTR/SCNN1A/LCN2/CCL3/…	75	BP
GO:0006935	chemotaxis	72/415	551/17910	8.51481774080928e-34	2.60702686606053e-32	9.93068070337203e-33	EDN1/HSPB1/CXCR4/FGFR1/MET/ELANE/PTK2/EZR/GSTP1/PDGFRB/SHH/SFTPD/WNT5A/BMP7/AGER/VEGFA/TGFB1/NKX2-1/CCR7/CCL11/TUBB2B/CXCR1/IL10/MAPK1/CXCL2/CREB1/LGALS3/PDGFA/SRC/CXCL10/CCL5/ABCC1/HGF/TYMP/HMGB1/TGFB2/PLAU/PTPN11/SMAD3/CSF1/LBP/CXCR2/TSC2/RHOA/CALCA/CXCL8/MAPK14/PDGFB/CALR/AGTR1/SMAD4/TUBB3/S100A8/CCL2/IL6/LYN/PIK3CG/FGF7/PIK3CA/FGF2/CXCL12/MAPK3/CXCL1/SERPINE1/VCAM1/MIF/F3/APOA1/CCL3/NOTCH1/PR…	72	BP
GO:0050673	epithelial cell proliferation	64/415	425/17910	1.06578129764071e-33	3.2502100287178e-32	1.2380692517706e-32	XDH/IGF1/FGFR1/LEP/APOE/BMP6/TNF/SHH/WNT5A/CTNNB1/CCND1/NOTCH2/ESR1/VEGFA/TGFB1/MYC/TNFAIP3/STAT1/IGFBP5/MMP12/CCL11/HMOX1/BRCA2/IL10/MAPK1/MMP14/EGFR/APOH/CCL5/SIRT1/IGFBP3/NOD2/NME1/TWIST1/HGF/HMGB1/TGFB2/PTEN/SMAD3/PPARG/MTOR/PDGFB/STAT3/ARG1/AGTR1/SCARB1/CCL2/VDR/CD34/FGF7/SP1/FGF2/CXCL12/GLUL/CAV1/HIF1A/AKT1/SPARC/F3/APOA1/CEBPB/JUN/BAX/PRKCA	64	BP
GO:0055080	cation homeostasis	74/415	588/17910	1.21313432727933e-33	3.68495545657773e-32	1.4036723795148e-32	EDN1/ELANE/APOE/BCL2/TF/EDNRA/TFR2/AGT/PKHD1/ATP7B/BMP6/JAK2/F2/XIAP/WNT5A/B2M/ESR1/SCNN1B/TGFB1/MYC/IL13/SLC11A1/CCR7/PTPRC/ANXA2/CCL11/HMOX1/MAPK1/EGFR/SOD1/GPR35/CXCL10/CCL5/ALAS2/HAMP/SCNN1G/AGTR2/EPO/HMGB1/PKD1/TGM2/NOS1/PKD2/SMAD3/SLC40A1/CD36/CALCA/STEAP4/CALR/ATG5/AGTR1/SMAD4/TFRC/S100A8/VDR/SLC11A2/LYN/PIK3CG/IL2/DDIT3/FGF2/CXCL12/CAV1/MAPK3/LTF/HSP90B1/HIF1A/CFTR/SCNN1A/LCN2/CCL3/BAX/CP…	74	BP
GO:0048468	cell development	136/415	1971/17910	1.73029771688868e-33	5.23517242294864e-32	1.99418066749583e-32	EDN1/CXCR4/MPL/IGF1/EP300/SEMA4D/FGFR1/MET/LEP/DGUOK/APOE/C3/PTK2/BCL2/EDNRA/ACTC1/EZR/IL5/AGT/RARB/GSTP1/TCF4/FN1/NFE2L2/BMP6/PDGFRB/TNF/IL1A/ITGB1/LDLR/KRT8/SHH/THPO/JAK2/TNFRSF1A/SPP1/F2/WNT5A/BMP7/B2M/AGER/CTNNB1/NOTCH2/ESR1/TYMS/VEGFA/TGFB1/NKX2-1/PTPRC/ANXA2/INS/BGLAP/BRCA2/TUBB2B/MAPK1/MDM2/EGFR/IKBKB/SOD1/CREB1/BBS4/TERT/SRC/TP53/CDKN1A/CLDN1/IL1B/REN/HAMP/TLR2/NME1/AGTR2/TWIST1/EPO/HGF/H…	136	BP
GO:0044248	cellular catabolic process	139/415	2054/17910	2.02603535957864e-33	6.10591440720071e-32	2.3258635025751e-32	XDH/HSPB1/IGF1/EP300/NOS2/MET/UGT1A1/LEP/CYP2D6/CYP2C19/APOE/ALDH2/PTK2/BCL2/GPD1/GCK/ALAD/CYP1A1/EZR/HSPA8/NFE2L2/GAA/HP/PPARGC1A/CYP3A5/TNF/EGF/LDLR/SHH/CBS/CTNNB1/CYP2C9/PSMB8/TGFB1/PCSK9/VCP/SLC11A1/TNFAIP3/FOXO1/GPT/GCLC/MMP12/ANXA2/ABCD3/GGT1/HMOX1/INS/EXOC4/PNPLA3/ACADM/GSTM1/IL10/MDM2/IL4/AKR1D1/MAPK8/HADHB/SRC/HBB/TP53/LPL/CAT/HADHA/IDH1/SIRT1/IL1B/AGXT/CPT1A/SREBF1/TWIST1/HGF/TYMP/HMGB1…	139	BP
GO:0097190	apoptotic signaling pathway	73/415	579/17910	3.1136009716816e-33	9.34688416694263e-32	3.56041295322637e-32	HSPB1/IGF1/EP300/SOD2/FGFR1/BRCA1/BCL2/AGT/GSTP1/NFE2L2/SNAI1/TNF/IL1A/KRT8/SHH/JAK2/TNFRSF1A/PTGS2/CTNNB1/TGFB1/TNFAIP3/GCLC/PTPRC/CD14/HMOX1/INS/BRCA2/MDM2/SOD1/LGALS3/MAPK8/TERT/SRC/TP53/CDKN1A/SIRT1/IL1B/AGTR2/EPO/HGF/TGFB2/PTEN/SMAD3/FAS/CASP8/RAF1/GSN/S100A8/CASP3/RBCK1/IL2/DDIT3/IFNG/CXCL12/ICAM1/CAV1/TNFRSF1B/RELA/HIF1A/NOS3/TLR4/SERPINE1/AKT1/MIF/LCN2/IFNB1/CEBPB/JUN/BAX/PRKCA/S100A9/CSF…	73	BP
GO:0009968	negative regulation of signal transduction	107/415	1266/17910	3.54372216486276e-33	1.05966944890935e-31	4.03649041183016e-32	XDH/HSPB1/IGF1/SOD2/MET/BRCA1/APOE/BCL2/EZR/AGT/PKHD1/GSTP1/NFE2L2/SNAI1/TNF/EGF/IL1A/ITGB1/SHH/WNT5A/PTGS2/BMP7/CTNNB1/ESR1/PSMB8/TGFB1/MYC/NKX2-1/TNFAIP3/FOXO1/STAT1/GCLC/IGFBP5/MMP12/PTPRC/CD14/HMGCR/HMOX1/INS/SMAD2/MMP14/MDM2/EGFR/LGALS3/TERT/SRC/CCL5/TP53/SIRT1/IL1B/NFKBIA/IGFBP3/AGTR2/TWIST1/EPO/HGF/TGFB2/PTEN/AXIN1/NLRP3/PKD2/SMAD3/EZH2/FAS/CASP8/TSC2/CDH2/PPARG/RHOA/CXCL8/MTOR/MAPK14/RAF1…	107	BP
GO:0002274	myeloid leukocyte activation	77/415	652/17910	4.15779372345702e-33	1.23847460328555e-31	4.71759459197632e-32	ELANE/C3/HSPD1/ALAD/HSPA8/GSTP1/GAA/HP/TNF/LDLR/WNT5A/B2M/AGER/TGFB1/VCP/IL13/SLC11A1/CR1/PTPRC/CD14/ANXA2/HMOX1/CXCR1/MMP8/IL10/MAPK1/TLR7/LGALS3/IL4/HBB/CCL5/CAT/IDH1/NFKB1/TLR2/HAVCR2/HMGB1/DNASE1/PLAU/DSP/ALOX5/CSF1/CD36/LBP/CXCR2/RHOA/SERPINA1/CXCL8/MAPK14/GSN/MPO/ARG1/SLPI/CAMP/PTX3/S100A8/IL6/HSP90AA1/PECAM1/TTR/LYN/PYGL/RNASE3/PIK3CG/IFNG/TNFRSF1B/LTF/CXCL1/TLR4/TGFBR2/MIF/LCN2/CCL3/JUN/S…	77	BP
GO:0033002	muscle cell proliferation	50/415	243/17910	4.77480841248307e-33	1.41677230308619e-31	5.39676577732794e-32	MMP2/EDN1/IGF1/SOD2/FGFR1/ELANE/AGT/GSTP1/PPARGC1A/PDGFRB/TNF/SHH/JAK2/PTGS2/CTNNB1/IL13/TNFAIP3/STAT1/IGFBP5/HMGCR/HMOX1/IL10/MAPK1/MDM2/EGFR/TERT/CCL5/CDKN1A/IGFBP3/TGFB2/PTEN/TGM2/RXRA/PPARG/MTOR/MAPK14/PDGFB/ELN/STAT3/IL6/TGFB3/RBP4/IFNG/FGF2/TGFBR2/AKT1/JUN/NOTCH1/MMP9/ADIPOQ	50	BP
GO:0050878	regulation of body fluid levels	68/415	499/17910	4.80982989144867e-33	1.42167471983781e-31	5.41544005186994e-32	XDH/EDN1/HSPB1/MPL/MET/COL1A1/GNAS/APOE/HPS4/NFE2L2/ATP7B/SHH/JAK2/F2/CCND1/SCNN1B/VEGFA/ANXA2/MAPK1/PLAT/APOH/CREB1/PDGFA/SCT/SRC/HBB/PLG/CLDN1/SCNN1G/NME1/COL1A2/PLAU/IRF1/PTPN11/IFNA2/CD36/SERPINA1/THBD/RAF1/PDGFB/ATG5/VTN/ADA/IL6/ANXA5/VDR/CD34/COL3A1/LYN/PIK3CG/PIK3CA/CAV1/MAPK3/HNF4A/SH2B3/HIF1A/NOS3/CFTR/ACTB/TLR4/SERPINE1/SCNN1A/SERPINC1/F3/IFNB1/KCNN4/PRKCA/CD40LG	68	BP
GO:0044403	symbiont process	89/415	884/17910	5.44014472733812e-33	1.60182039193845e-31	6.10165052902896e-32	CXCR4/EP300/MET/ELANE/APOE/HSPD1/BCL2/IRF3/HSPA8/FN1/NFE2L2/TNF/CREBBP/ITGB1/LDLR/KRT8/TNFRSF1A/SFTPD/F2/B2M/CTNNB1/ACE2/TYMS/PSMB8/TGFB1/MRC1/VCP/MMP1/STAT1/CR1/SLC22A5/ANXA2/EIF2AK2/SLC10A1/IL10/MAPK1/MDM2/EGFR/IKBKB/CREB1/SRC/PLG/CCL5/TP53/CLDN1/SIRT1/NFKBIA/RXRA/SMAD3/IFNA2/CD36/LBP/CASP8/TSC2/RHOA/CXCL8/GSN/MPO/VIM/PCNA/ATG5/STAT3/ARG1/SLPI/CAMP/PTX3/SCARB1/TFRC/CCL2/RBCK1/LYN/CD80/SP1/CDH1/…	89	BP
GO:0070661	leukocyte proliferation	52/415	270/17910	7.66972299904091e-33	2.24968783387898e-31	8.56950568916543e-32	MPL/IGF1/LEP/FOXP3/HSPD1/BCL2/IL5/GSTP1/SHH/SFTPD/AGER/CTNNB1/TGFB1/IL13/SLC11A1/TNFAIP3/PTPRC/IL10/LGALS3/IL4/CCL5/TP53/CDKN1A/IL1B/HAVCR2/EPO/HMGB1/IL12RB1/IRF1/CSF1/ARG1/TFRC/ADA/IL6/CASP3/ACE/LYN/IGF2/PIK3CG/IL2/TNFRSF1B/CD81/TLR4/VCAM1/TGFBR2/TLR9/MIF/IFNB1/CEBPB/CD274/BAX/CD40LG	52	BP
GO:0043068	positive regulation of programmed cell death	77/415	660/17910	9.65290018173521e-33	2.82062881736255e-31	1.07443327618193e-31	XDH/SOD2/LEP/HSPD1/BCL2/AGT/RARB/PPARGC1A/PDGFRB/TNF/ITGB1/JAK2/TNFRSF1A/WNT5A/PTGS2/BMP7/CTNNB1/TGFB1/MYC/PCSK9/VCP/FOXO1/PTPRC/HMGCR/HMOX1/IL10/SOD1/CREB1/MAPK8/SRC/CCL5/TP53/CDKN1A/SIRT1/IGFBP3/AGTR2/HMGB1/TGFB2/PTEN/NLRP3/TGM2/SMAD3/FAS/CXCR2/CASP8/PPARG/RHOA/GSN/NOX4/S100A8/CCL2/IL6/CASP3/VDR/RBCK1/LYN/TGFB3/DDIT3/IFNG/TOP2A/CAV1/TNFRSF1B/ATF6/AKT1/F3/LTA/IFNB1/CDKN2A/CCL3/JUN/NOTCH1/CD274/B…	77	BP
GO:0010876	lipid localization	59/415	366/17910	9.70694189369443e-33	2.82567607776673e-31	1.07635587744674e-31	EDN1/NOS2/LEP/APOE/C3/AGT/CRP/BMP6/TNF/EGF/LDLR/ABCC2/SHH/SPP1/SLCO1B1/PCSK9/ANXA2/ABCD3/SLC10A1/APOH/CETP/LPL/ABCB11/NFKB1/SIRT1/ABCC1/IL1B/REN/NFKBIA/CPT1A/AGTR2/SLCO1B3/RXRA/PTPN11/APOC3/CD36/LBP/PPARG/MTTP/ABCB1/NR1H2/AGTR1/SCARB1/IL6/CPT2/ACE/PRKAA2/PPARA/RBP4/FABP1/CAV1/ABCB4/CFTR/NR1H4/AKT1/MIF/APOA1/KCNN4/ADIPOQ	59	BP
GO:0031324	negative regulation of cellular metabolic process	151/415	2432/17910	1.9301374371526e-32	5.59739856774254e-31	2.1321597667215e-31	XDH/EDN1/HSPB1/IGF1/EP300/SEMA4D/FGFR1/MET/LEP/BRCA1/CYP2D6/ELANE/FOXP3/BIRC5/APOE/C3/PTK2/BCL2/GCK/ALAD/EZR/HSPA8/GSTP1/NR1I3/HP/BMP6/PPARGC1A/SNAI1/TNF/CREBBP/SHH/SFTPD/F2/XIAP/WNT5A/PTGS2/BMP7/CTNNB1/CCND1/ESR1/TYMS/VEGFA/TGFB1/MYC/PCSK9/NKX2-1/SLC11A1/TNFAIP3/FOXO1/STAT1/GCLC/IGFBP5/MMP12/CR1/PTPRC/HMGCR/ANXA2/EIF2AK2/HMOX1/INS/SMAD2/MMP3/BRCA2/IL10/PLAT/MDM2/IKBKB/CREB1/LGALS3/PDGFA/IL4/TERT…	151	BP
GO:0034654	nucleobase-containing compound biosynthetic process	202/415	4029/17910	2.09730437747498e-32	6.05931734620121e-31	2.3081137608856e-31	XDH/EDN1/IGF1/EP300/SOD2/SEMA4D/FGFR1/MET/LEP/BRCA1/ELANE/COL1A1/DGUOK/FOXP3/BIRC5/APOE/AIRE/HSPD1/GPD1/GCK/TFR2/IRF3/EZR/IL5/AGT/PKHD1/HSPA8/RARB/TCF4/NFE2L2/NR1I3/BMP6/PPARGC1A/SNAI1/PDGFRB/TNF/EGF/IL1A/CREBBP/NOP10/SHH/JAK2/TNFRSF1A/SPP1/XIAP/WNT5A/PTGS2/BMP7/AGER/CTNNB1/CCND1/NOTCH2/ESR1/TYMS/PSMB8/VEGFA/TGFB1/MYC/NKX2-1/VCP/SLC11A1/TNFAIP3/FOXO1/STAT1/GCLC/MMP12/EIF2AK2/HMOX1/INS/SMAD2/BRCA2…	202	BP
GO:0048514	blood vessel morphogenesis	77/415	670/17910	2.71686429127689e-32	7.81988841889997e-31	2.97875008635562e-31	MMP2/XDH/EDN1/HSPB1/CXCR4/FGFR1/LEP/BRCA1/APOE/C3/PTK2/EDNRA/AGT/FN1/NFE2L2/PDGFRB/EGF/IL1A/ITGB1/LDLR/SHH/WNT5A/PTGS2/CTNNB1/VEGFA/TGFB1/TNFAIP3/STAT1/ANXA2/CCL11/HMOX1/IL10/MMP14/APOH/PDGFA/TERT/CXCL10/SIRT1/IL1B/TWIST1/HGF/TYMP/TGFB2/PTEN/PKD2/CXCR2/PPARG/RHOA/CXCL8/MAPK14/SMAD7/STAT3/AGTR1/CCL2/IL6/CD34/COL3A1/ENG/PECAM1/PIK3CG/SP1/PIK3CA/FGF2/GLUL/CAV1/HIF1A/NOS3/SERPINE1/TGFBR2/JAK1/AKT1/SP…	77	BP
GO:0043065	positive regulation of apoptotic process	76/415	652/17910	2.782648253944e-32	7.97934769834314e-31	3.03949127816899e-31	XDH/SOD2/LEP/HSPD1/BCL2/AGT/RARB/PPARGC1A/PDGFRB/TNF/ITGB1/JAK2/TNFRSF1A/WNT5A/PTGS2/BMP7/CTNNB1/TGFB1/MYC/PCSK9/VCP/FOXO1/PTPRC/HMGCR/HMOX1/IL10/SOD1/CREB1/MAPK8/SRC/CCL5/TP53/SIRT1/IGFBP3/AGTR2/HMGB1/TGFB2/PTEN/NLRP3/TGM2/SMAD3/FAS/CXCR2/CASP8/PPARG/RHOA/GSN/NOX4/S100A8/CCL2/IL6/CASP3/VDR/RBCK1/LYN/TGFB3/DDIT3/IFNG/TOP2A/CAV1/TNFRSF1B/ATF6/AKT1/F3/LTA/IFNB1/CDKN2A/CCL3/JUN/NOTCH1/CD274/BAX/CD40…	76	BP
GO:0043410	positive regulation of MAPK cascade	67/415	499/17910	3.72319072902037e-32	1.06366991645062e-30	4.05172898352794e-31	XDH/EDN1/CXCR4/IGF1/FGFR1/LEP/ELANE/APOE/PDGFRB/TNF/EGF/THPO/JAK2/WNT5A/AGER/CTNNB1/NOTCH2/VEGFA/TGFB1/CCR7/PTPRC/HMGCR/EIF2AK2/INS/MMP8/MAPK1/EGFR/SOD1/PDGFA/SRC/IL1B/IGFBP3/NOD2/HAVCR2/EPO/HGF/HMGB1/TGFB2/PTEN/AXIN1/PTPN11/EZH2/CD36/CDH2/KRAS/MAPK14/RAF1/PDGFB/NOX4/ADRB2/IL6/TGFB3/IGF2/PIK3CG/FGF2/ICAM1/MAPK3/CD81/TLR4/INSR/TLR9/MIF/CCL3/JUN/NOTCH1/PRKCA/CD40LG	67	BP
GO:0051047	positive regulation of secretion	61/415	409/17910	7.06988529449424e-32	2.01229883289586e-30	7.66524405613586e-31	EDN1/IGF1/FGFR1/LEP/GCK/TFR2/IRF3/EZR/IL5/AGT/BMP6/TNF/IL1A/JAK2/SPP1/WNT5A/AGER/TGFB1/IL13/MMP12/CD14/INS/MMP8/IL10/EGFR/CREB1/SRC/LPL/IL1B/NOD2/TLR2/HAVCR2/AGTR2/TWIST1/HMGB1/TGFB2/NLRP3/PTPN11/IL17A/MAPK14/ATG5/CHUK/SMAD4/S100A8/IL6/CD34/TGFB3/RBP4/IL2/IFNG/CXCL12/GLUL/MAPK3/HIF1A/CFTR/NR1H4/TLR4/MIF/CCL3/KCNN4/CD274	61	BP
GO:1904951	positive regulation of establishment of protein localization	63/415	440/17910	7.209872227984e-32	2.04457077756668e-30	7.78817427307186e-31	IGF1/LEP/BCL2/GCK/IRF3/EZR/IL5/HPS4/BMP6/TNF/IL1A/SHH/JAK2/WNT5A/PTGS2/AGER/TGFB1/IL13/MMP12/CD14/INS/MMP8/IL10/MAPK1/MDM2/EGFR/MAPK8/SRC/TP53/LPL/IL1B/NOD2/TLR2/HAVCR2/AGTR2/TWIST1/HMGB1/TGFB2/NLRP3/SMAD3/CASP8/IL17A/MAPK14/CHUK/DKC1/IL6/CD34/TGFB3/RBP4/IL2/CDH1/IFNG/GLUL/MAPK3/CD81/HIF1A/CFTR/NR1H4/TLR4/MIF/CCL3/KCNN4/CD274	63	BP
GO:0002443	leukocyte mediated immunity	84/415	814/17910	7.53495020636534e-32	2.12890045352638e-30	8.10940267952864e-31	LEP/ELANE/FOXP3/AIRE/C3/HSPD1/ALAD/HSPA8/GSTP1/GAA/HP/TNF/F2/B2M/AGER/TGFB1/VCP/IL13/SLC11A1/CR1/PTPRC/CD14/ANXA2/HMOX1/CXCR1/MMP8/IL10/MAPK1/LGALS3/IL4/HBB/CAT/IDH1/NFKB1/IL1B/NOD2/TLR2/HAVCR2/HMGB1/DNASE1/IL12RB1/PLAU/DSP/ALOX5/NLRP3/IFNA2/CD36/CXCR2/RHOA/SERPINA1/MAPK14/GSN/SMAD7/MPO/ARG1/SLPI/CAMP/PTX3/TFRC/S100A8/IL6/HSP90AA1/ACE/PECAM1/TTR/LYN/PYGL/RNASE3/PIK3CG/IL2/ICAM1/TNFRSF1B/LTF/CXCL1…	84	BP
GO:0044271	cellular nitrogen compound biosynthetic process	221/415	4735/17910	8.96408516880088e-32	2.52340639275585e-30	9.61215379002708e-31	XDH/EDN1/HSPB1/IGF1/EP300/NOS2/SOD2/SEMA4D/FGFR1/MET/LEP/BRCA1/ELANE/COL1A1/DGUOK/FOXP3/BIRC5/APOE/AIRE/HSPD1/GPD1/GCK/ASS1/ALAD/TFR2/IRF3/EZR/IL5/AGT/PKHD1/HSPA8/RARB/TCF4/NFE2L2/NR1I3/BMP6/PPARGC1A/SNAI1/PDGFRB/TNF/EGF/IL1A/CREBBP/NOP10/SHH/JAK2/TNFRSF1A/SPP1/XIAP/WNT5A/PTGS2/BMP7/AGER/CTNNB1/CCND1/NOTCH2/ESR1/TYMS/PSMB8/VEGFA/TGFB1/MYC/NKX2-1/VCP/SLC11A1/TNFAIP3/FOXO1/STAT1/GCLC/IGFBP5/MMP12/G…	221	BP
GO:1903532	positive regulation of secretion by cell	59/415	381/17910	9.43254217479496e-32	2.64558710267516e-30	1.0077564267424e-30	EDN1/IGF1/FGFR1/LEP/GCK/TFR2/IRF3/EZR/IL5/AGT/BMP6/TNF/IL1A/JAK2/SPP1/WNT5A/AGER/TGFB1/IL13/MMP12/CD14/INS/MMP8/IL10/EGFR/CREB1/SRC/LPL/IL1B/NOD2/TLR2/HAVCR2/AGTR2/TWIST1/HMGB1/TGFB2/NLRP3/PTPN11/IL17A/MAPK14/CHUK/SMAD4/IL6/CD34/TGFB3/RBP4/IL2/IFNG/CXCL12/GLUL/MAPK3/HIF1A/CFTR/NR1H4/TLR4/MIF/CCL3/KCNN4/CD274	59	BP
GO:0032943	mononuclear cell proliferation	49/415	246/17910	1.0711675990993e-31	2.99342654511931e-30	1.14025534663929e-30	MPL/IGF1/LEP/FOXP3/HSPD1/BCL2/IL5/SHH/SFTPD/AGER/CTNNB1/TGFB1/IL13/SLC11A1/PTPRC/IL10/LGALS3/IL4/CCL5/TP53/CDKN1A/IL1B/HAVCR2/EPO/HMGB1/IL12RB1/IRF1/CSF1/ARG1/TFRC/ADA/IL6/CASP3/ACE/IGF2/PIK3CG/IL2/TNFRSF1B/CD81/TLR4/VCAM1/TGFBR2/TLR9/MIF/IFNB1/CEBPB/CD274/BAX/CD40LG	49	BP
GO:0031410	cytoplasmic vesicle	138/415	2179/18675	5.74003166228973e-32	4.54180005278675e-30	2.57546157479052e-30	ABCA3/EDN1/CXCR4/IGF1/FGFR1/ELANE/COL1A1/APOE/C3/HSPD1/TF/ALAD/TFR2/EZR/HPS4/HSPA8/GSTP1/FN1/GAA/HP/ATP7B/PDGFRB/TNF/EGF/ITGB1/LDLR/JAK2/SFTPD/WNT5A/B2M/SCNN1B/VEGFA/TGFB1/MRC1/PCSK9/VCP/SLC11A1/CR1/PTPRC/CD14/ANXA2/INS/BRCA2/CXCR1/MMP8/MAPK1/MMP14/PLAT/MDM2/EGFR/SOD1/APOH/TLR7/LGALS3/PDGFA/SRC/HBB/PLG/CAT/IDH1/NFKB1/ALB/SREBF1/HLA-C/TLR2/HAVCR2/HGF/HMGB1/TGFB2/PLAU/AXIN1/DSP/ALOX5/PKD1/FASN/PKD2…	138	CC
GO:0097708	intracellular vesicle	138/415	2182/18675	6.64124395104013e-32	4.54882391354243e-30	2.57944450738832e-30	ABCA3/EDN1/CXCR4/IGF1/FGFR1/ELANE/COL1A1/APOE/C3/HSPD1/TF/ALAD/TFR2/EZR/HPS4/HSPA8/GSTP1/FN1/GAA/HP/ATP7B/PDGFRB/TNF/EGF/ITGB1/LDLR/JAK2/SFTPD/WNT5A/B2M/SCNN1B/VEGFA/TGFB1/MRC1/PCSK9/VCP/SLC11A1/CR1/PTPRC/CD14/ANXA2/INS/BRCA2/CXCR1/MMP8/MAPK1/MMP14/PLAT/MDM2/EGFR/SOD1/APOH/TLR7/LGALS3/PDGFA/SRC/HBB/PLG/CAT/IDH1/NFKB1/ALB/SREBF1/HLA-C/TLR2/HAVCR2/HGF/HMGB1/TGFB2/PLAU/AXIN1/DSP/ALOX5/PKD1/FASN/PKD2…	138	CC
GO:0030141	secretory granule	82/415	806/18675	7.18613572439562e-32	4.54882391354243e-30	2.57944450738832e-30	ABCA3/EDN1/IGF1/ELANE/COL1A1/C3/HSPD1/TF/ALAD/HPS4/HSPA8/GSTP1/FN1/GAA/HP/EGF/B2M/VEGFA/TGFB1/VCP/SLC11A1/CR1/PTPRC/CD14/ANXA2/INS/BRCA2/CXCR1/MMP8/MAPK1/PLAT/SOD1/APOH/LGALS3/PDGFA/HBB/PLG/CAT/IDH1/NFKB1/ALB/TLR2/HGF/HMGB1/TGFB2/PLAU/DSP/ALOX5/CD36/CXCR2/RHOA/SERPINA1/MAPK14/GSN/MPO/PDGFB/CALR/ARG1/SLPI/CAMP/PTX3/S100A8/HSP90AA1/PECAM1/TTR/TGFB3/IGF2/PYGL/RNASE3/CAV1/TNFRSF1B/LTF/CXCL1/SFTPB/SER…	82	CC
GO:0044092	negative regulation of molecular function	97/415	1096/17910	1.73292425795279e-31	4.82518946462578e-30	1.8380100539156e-30	HSPB1/SEMA4D/MET/UGT1A1/CYP2D6/FOXP3/BIRC5/APOE/C3/PKHD1/GSTP1/HP/PPARGC1A/TNF/JAK2/SFTPD/XIAP/PTGS2/BMP7/B2M/ESR1/VEGFA/PCSK9/IL13/TNFAIP3/CR1/PTPRC/HMGCR/ANXA2/HMOX1/INS/IL10/MDM2/IKBKB/LGALS3/BBS4/MAPK8/GPR35/SRC/TP53/CDKN1A/CAT/NFKB1/SIRT1/IL1B/NFKBIA/HAVCR2/AGTR2/TWIST1/EPO/HGF/TGFB2/PTEN/NLRP3/PKD1/NOS1/PKD2/APOC3/EZH2/CASP8/TSC2/PPARG/RAF1/SMAD7/PDGFB/CHUK/SLPI/VTN/PTX3/ADRB2/AIP/ANXA5/CAS…	97	BP
GO:0071900	regulation of protein serine/threonine kinase activity	65/415	479/17910	1.8105424013409e-31	5.01010455140622e-30	1.90844786596729e-30	EDN1/HSPB1/CXCR4/IGF1/FGFR1/ELANE/APOE/GSTP1/PDGFRB/TNF/EGF/JAK2/WNT5A/BMP7/AGER/CCND1/VEGFA/TGFB1/TNFAIP3/PTPRC/HMGCR/EIF2AK2/MAPK1/EGFR/SOD1/PDGFA/SRC/CDKN1A/SIRT1/IL1B/NOD2/HGF/PTEN/PKD1/PKD2/PTPN11/EZH2/KRAS/RHOA/MAPK14/RAF1/PDGFB/NOX4/ADRB2/CASP3/LYN/TGFB3/IGF2/PIK3CG/IFNG/FGF2/CAV1/MAPK3/LTF/CD81/SH2B3/ACTB/TLR4/INSR/TLR9/AKT1/MIF/CDKN2A/CD40LG/ADIPOQ	65	BP
GO:0016192	vesicle-mediated transport	130/415	1899/17910	1.81237353974096e-31	5.01010455140622e-30	1.90844786596729e-30	IGF1/LEP/ELANE/APOE/C3/PTK2/TF/ALAD/TFR2/EZR/CRP/HSPA8/GSTP1/FN1/GAA/HP/TNF/EGF/ITGB1/LDLR/SHH/SFTPD/F2/WNT5A/B2M/AGER/CTNNB1/VEGFA/TGFB1/MRC1/PCSK9/VCP/IL13/SLC11A1/CR1/PTPRC/CD14/ANXA2/HMOX1/INS/EXOC4/BGLAP/CXCR1/MMP8/MAPK1/SOD1/APOH/LGALS3/PDGFA/IL4/SRC/HBB/PLG/CCL5/CAT/IDH1/NFKB1/IL1B/ALB/TLR2/NME1/HGF/HMGB1/TGFB2/PLAU/PTEN/DSP/ALOX5/TGM2/APOC3/CD36/LBP/CXCR2/TSC2/PPARG/RHOA/SERPINA1/CXCL8/SE…	130	BP
GO:0031349	positive regulation of defense response	67/415	512/17910	1.82324006930289e-31	5.02207882888627e-30	1.91300910497315e-30	EP300/C3/HSPD1/IRF3/AGT/TNF/CREBBP/LDLR/JAK2/TNFRSF1A/SFTPD/XIAP/WNT5A/PTGS2/AGER/ESR1/PSMB8/TNFAIP3/MMP12/CCR7/CD14/MMP8/EGFR/IKBKB/TLR7/SRC/CCL5/LPL/NFKB1/IL1B/NFKBIA/NOD2/TLR2/HAVCR2/HMGB1/IRF1/TGM2/CD36/LBP/CASP8/KRAS/IL17A/RAF1/CHUK/ARG1/AGTR1/S100A8/IL6/LYN/PIK3CG/IL2/CAV1/MAPK3/LTF/HSP90B1/CD81/RELA/NR1H4/TLR4/SERPINE1/TLR9/MUC5AC/LTA/IFNB1/CEBPB/CCL3/S100A9	67	BP
GO:0040007	growth	90/415	948/17910	2.06973568477502e-31	5.68068526339144e-30	2.16388531554862e-30	EDN1/CXCR4/IGF1/EP300/SEMA4D/FGFR1/LEP/ELANE/GNAS/APOE/PTK2/BCL2/EZR/AGT/RARB/FN1/PDGFRB/TNF/ITGB1/SHH/SPP1/F2/WNT5A/CTNNB1/NOTCH2/ESR1/TYMS/VEGFA/TGFB1/IGFBP5/CCL11/INS/SMAD2/BRCA2/IL10/MAPK1/MMP14/EGFR/SOD1/CREB1/BBS4/SRC/TP53/CDKN1A/SIRT1/IGFBP3/HAMP/AGTR2/TGFB2/PTEN/RXRA/PTPN11/SMAD3/EZH2/CSF1/CD36/LBP/PPARG/RHOA/MTOR/MAPK14/GSN/MPO/STAT3/AGTR1/CAMP/PTX3/ADRB2/SMAD4/S100A8/HSP90AA1/PPARA/RBP4…	90	BP
GO:0006873	cellular ion homeostasis	68/415	531/17910	2.36369015899448e-31	6.46439817504362e-30	2.4624170564389e-30	EDN1/ELANE/APOE/BCL2/TF/EDNRA/TFR2/AGT/PKHD1/ATP7B/BMP6/ABCC2/JAK2/F2/WNT5A/ESR1/TGFB1/MYC/IL13/SLC11A1/CCR7/PTPRC/ANXA2/CCL11/HMOX1/MAPK1/SOD1/GPR35/CXCL10/CCL5/ALAS2/HAMP/AGTR2/EPO/HMGB1/PKD1/TGM2/NOS1/PKD2/SMAD3/SLC40A1/CD36/CALCA/CALR/ATG5/AGTR1/SMAD4/TFRC/S100A8/VDR/SLC11A2/LYN/PIK3CG/IL2/DDIT3/FGF2/CXCL12/CAV1/MAPK3/LTF/HSP90B1/HIF1A/CFTR/LCN2/CCL3/BAX/CP/S100A9	68	BP
GO:0045785	positive regulation of cell adhesion	59/415	388/17910	2.62517497366754e-31	7.14688625047755e-30	2.72239025614876e-30	IGF1/LEP/ELANE/FOXP3/HSPD1/FN1/TNF/SHH/JAK2/WNT5A/BMP7/AGER/VEGFA/TGFB1/CCR7/PTPRC/IL10/IL4/SRC/CCL5/IL1B/NOD2/HAVCR2/EPO/HMGB1/IL12RB1/TGFB2/NLRP3/TGM2/PTPN11/SMAD3/CSF1/CD36/RHOA/SMAD7/CALR/VTN/TFRC/CCL2/ADA/IL6/LYN/IGF2/CD80/PIK3CA/IL2/IFNG/CXCL12/ICAM1/CAV1/CD81/RELA/VCAM1/TGFBR2/AKT1/APOA1/CD274/PRKCA/CD40LG	59	BP
GO:0071363	cellular response to growth factor stimulus	76/415	674/17910	2.63183969926499e-31	7.14688625047755e-30	2.72239025614876e-30	XDH/EDN1/HSPB1/EP300/FGFR1/COL1A1/PTK2/AGT/GSTP1/BMP6/PPARGC1A/PDGFRB/CREBBP/XIAP/WNT5A/BMP7/CTNNB1/VEGFA/TGFB1/NKX2-1/GCLC/SMAD2/BGLAP/IL10/MAPK1/MDM2/EGFR/CREB1/SRC/CCL5/TP53/CAT/CLDN1/SIRT1/IL1B/AGTR2/TWIST1/COL1A2/HGF/TGFB2/PTEN/NOS1/PTPN11/SMAD3/RHOA/CXCL8/NR3C1/MAPK14/RAF1/SMAD7/PDGFB/ARG1/NOX4/VTN/SMAD4/CCL2/CASP3/COL3A1/ENG/TGFB3/FGF7/FOS/HSPA5/FGF2/CAV1/TNFRSF1B/MAPK3/RELA/HIF1A/VCAM1/IN…	76	BP
GO:0050778	positive regulation of immune response	83/415	809/17910	2.81802871246117e-31	7.62554600537468e-30	2.90472121918255e-30	EP300/ELANE/FOXP3/C3/HSPD1/PTK2/BCL2/IRF3/EZR/TNF/CREBBP/SFTPD/F2/XIAP/WNT5A/B2M/ESR1/PSMB8/TGFB1/IL13/SLC11A1/TNFAIP3/MMP12/CCR7/CR1/PTPRC/CD14/MAPK1/IKBKB/TLR7/LGALS3/IL4/SRC/CCL5/NFKB1/SIRT1/IL1B/NFKBIA/NOD2/TLR2/HAVCR2/HMGB1/IL12RB1/TGFB2/IRF1/NLRP3/CD36/LBP/CASP8/KRAS/MAPK14/RAF1/CHUK/VTN/TFRC/S100A8/ADA/IL6/HSP90AA1/RBCK1/LYN/CD80/PIK3CA/IL2/IFNG/CAV1/MAPK3/LTF/HSP90B1/CD81/RELA/NR1H4/ACTB/…	83	BP
GO:0006875	cellular metal ion homeostasis	64/415	467/17910	3.07902458327518e-31	8.2735328400244e-30	3.15155221423934e-30	EDN1/ELANE/APOE/BCL2/TF/EDNRA/TFR2/AGT/PKHD1/ATP7B/BMP6/JAK2/F2/WNT5A/ESR1/TGFB1/MYC/IL13/SLC11A1/CCR7/PTPRC/ANXA2/CCL11/HMOX1/SOD1/GPR35/CXCL10/CCL5/ALAS2/HAMP/AGTR2/EPO/HMGB1/PKD1/TGM2/NOS1/PKD2/SMAD3/SLC40A1/CD36/CALCA/CALR/ATG5/AGTR1/SMAD4/TFRC/S100A8/VDR/SLC11A2/LYN/PIK3CG/IL2/DDIT3/FGF2/CXCL12/CAV1/LTF/HSP90B1/HIF1A/LCN2/CCL3/BAX/CP/S100A9	64	BP
GO:0050900	leukocyte migration	64/415	467/17910	3.07902458327518e-31	8.2735328400244e-30	3.15155221423934e-30	EDN1/CXCR4/LEP/ELANE/COL1A1/AIRE/FN1/TNF/ITGB1/SFTPD/F2/WNT5A/AGER/VEGFA/TGFB1/MMP1/CCR7/CCL11/HMOX1/CXCR1/IL10/MMP14/LGALS3/SRC/CXCL10/CCL5/UMOD/COL1A2/HMGB1/TGFB2/PTPN11/CSF1/LBP/CXCR2/RHOA/CALCA/CXCL8/SELE/THBD/IL17A/MAPK14/PDGFB/CALR/S100A8/CCL2/ADA/IL6/CD34/PECAM1/LYN/PIK3CG/PIK3CA/CXCL12/ICAM1/CAV1/MAPK3/CD81/SERPINE1/VCAM1/AKT1/MIF/CCL3/S100A9/MMP9	64	BP
GO:0030003	cellular cation homeostasis	67/415	518/17910	3.73172727873364e-31	9.99244743451846e-30	3.8063207636744e-30	EDN1/ELANE/APOE/BCL2/TF/EDNRA/TFR2/AGT/PKHD1/ATP7B/BMP6/JAK2/F2/WNT5A/ESR1/TGFB1/MYC/IL13/SLC11A1/CCR7/PTPRC/ANXA2/CCL11/HMOX1/MAPK1/SOD1/GPR35/CXCL10/CCL5/ALAS2/HAMP/AGTR2/EPO/HMGB1/PKD1/TGM2/NOS1/PKD2/SMAD3/SLC40A1/CD36/CALCA/CALR/ATG5/AGTR1/SMAD4/TFRC/S100A8/VDR/SLC11A2/LYN/PIK3CG/IL2/DDIT3/FGF2/CXCL12/CAV1/MAPK3/LTF/HSP90B1/HIF1A/CFTR/LCN2/CCL3/BAX/CP/S100A9	67	BP
GO:0018193	peptidyl-amino acid modification	97/415	1107/17910	3.88099600147605e-31	1.03560605108831e-29	3.94482817255296e-30	IGF1/EP300/NOS2/SEMA4D/FGFR1/MET/LEP/BRCA1/FOXP3/PTK2/BCL2/IL5/AGT/PPARGC1A/PDGFRB/TNF/EGF/CREBBP/JAK2/TNFRSF1A/WNT5A/PTGS2/BMP7/CTNNB1/VEGFA/TGFB1/VCP/IL13/PTPRC/EIF2AK2/BRCA2/MAPK1/MDM2/EGFR/IKBKB/PDGFA/IL4/MAPK8/SRC/CCL5/TP53/SIRT1/IL1B/TWIST1/EPO/HGF/AXIN1/PKD1/TGM2/NOS1/IFNA2/EZH2/CD36/MTOR/MAPK14/RAF1/SMAD7/PDGFB/CSF3/ATG5/STAT3/NOX4/VTN/SMAD4/S100A8/IL6/HSP90AA1/ACE/PRKAA2/PECAM1/LYN/IGF2/…	97	BP
GO:0050867	positive regulation of cell activation	54/415	319/17910	4.24254690596542e-31	1.1281651547524e-29	4.29740409597153e-30	MPL/IGF1/LEP/FOXP3/HSPD1/BCL2/IL5/PDGFRB/SHH/JAK2/WNT5A/AGER/TGFB1/IL13/CCR7/PTPRC/MMP8/IL10/MMP14/IL4/SRC/CCL5/CDKN1A/IL1B/NOD2/HAVCR2/EPO/HMGB1/IL12RB1/NLRP3/PTPN11/LBP/RHOA/TFRC/CCL2/ADA/IL6/LYN/IGF2/CD80/PIK3CA/IL2/IFNG/CAV1/CD81/TLR4/VCAM1/TGFBR2/TLR9/AKT1/MIF/CCL3/CD274/CD40LG	54	BP
GO:0035690	cellular response to drug	57/415	362/17910	4.45485207543571e-31	1.18053579999046e-29	4.49689423658319e-30	EDN1/CXCR4/NOS2/MET/UGT1A1/BRCA1/ASS1/NFE2L2/PPARGC1A/TNF/ABCC2/PTGS2/CTNNB1/TGFB1/MYC/TNFAIP3/FOXO1/GCLC/HMOX1/MMP3/IL10/MAPK1/MDM2/EGFR/SOD1/SRC/TP53/NFKB1/SIRT1/IL1B/REN/NOD2/NME1/AGTR2/HGF/PTEN/EZH2/NR3C1/PDGFB/VIM/PCNA/ARG1/TFRC/IL6/PRKAA2/FABP1/CDH1/HSPA5/ICAM1/MAPK3/HSP90B1/RELA/CFTR/ACTB/LCN2/TXN/ADIPOQ	57	BP
GO:0050863	regulation of T cell activation	53/415	307/17910	5.6844570604129e-31	1.50120455358327e-29	5.71838491047505e-30	IGF1/LEP/FOXP3/HSPD1/SHH/SFTPD/AGER/CTNNB1/TGFB1/CCR7/CR1/PTPRC/IL10/SOD1/LGALS3/IL4/SRC/CCL5/IL1B/NOD2/HAVCR2/EPO/HMGB1/IL12RB1/IRF1/NLRP3/PTPN11/IFNA2/RHOA/GSN/SMAD7/ARG1/TFRC/CCL2/ADA/IL6/CASP3/LYN/IGF2/CD80/PIK3CA/IL2/IFNG/CAV1/TNFRSF1B/CD81/VCAM1/TGFBR2/AKT1/IFNB1/CEBPB/CD274/CD40LG	53	BP
GO:0007507	heart development	69/415	556/17910	5.83735562318844e-31	1.53630403986997e-29	5.85208579238899e-30	EDN1/IGF1/EP300/FGFR1/PTK2/EDNRA/ACTC1/AGT/RARB/GAA/SNAI1/PDGFRB/ITGB1/SHH/TNFRSF1A/WNT5A/BMP7/CTNNB1/NOTCH2/VEGFA/TGFB1/SMAD2/MAPK1/MDM2/EGFR/CREB1/BBS4/TP53/CDKN1A/HAMP/AGTR2/TWIST1/TGFB2/PTEN/DSP/PKD1/RXRA/PKD2/PTPN11/SMAD3/TSC2/PPARG/MTOR/MAPK14/RAF1/SMAD7/PDGFB/ELN/CALR/PCNA/ATG5/NOX4/SMAD4/CASP3/COL3A1/ENG/PPARA/RBP4/FGF2/TNFRSF1B/MAPK3/HIF1A/NOS3/VCAM1/INSR/TGFBR2/SPARC/JUN/NOTCH1	69	BP
GO:0019752	carboxylic acid metabolic process	92/415	1006/17910	7.06548037924983e-31	1.85318145783396e-29	7.05913451937983e-30	EDN1/IGF1/NOS2/UGT1A1/LEP/BRCA1/CYP2D6/CYP2C19/C3/GPD1/GCK/ASS1/CYP1A1/GSTP1/PPARGC1A/EGF/ABCC2/TNFRSF1A/PTGS2/CBS/CYP2C9/TYMS/PSMB8/TGFB1/GPT/GCLC/FH/ABCD3/GGT1/INS/PNPLA3/ACADM/AKR1D1/HADHB/TP53/LPL/ABCB11/HADHA/IDH1/NFKB1/SIRT1/ABCC1/IL1B/AGXT/CPT1A/SREBF1/TLR2/TWIST1/HGF/ALOX5/FASN/FARSB/NOS1/MTHFR/APOC3/CD36/PPARG/MTOR/MAPK14/PDGFB/NR1H2/STAT3/ARG1/NOX4/CYP2E1/UGT1A6/CPT2/PRKAA2/PPARA/UGT1A9…	92	BP
GO:0070848	response to growth factor	77/415	704/17910	7.95055503524034e-31	2.0782318178851e-29	7.91639582993319e-30	XDH/EDN1/HSPB1/EP300/FGFR1/COL1A1/PTK2/AGT/GSTP1/BMP6/PPARGC1A/PDGFRB/CREBBP/XIAP/WNT5A/BMP7/CTNNB1/VEGFA/TGFB1/MYC/NKX2-1/GCLC/SMAD2/BGLAP/IL10/MAPK1/MDM2/EGFR/CREB1/SRC/CCL5/TP53/CAT/CLDN1/SIRT1/IL1B/AGTR2/TWIST1/COL1A2/HGF/TGFB2/PTEN/NOS1/PTPN11/SMAD3/RHOA/CXCL8/NR3C1/MAPK14/RAF1/SMAD7/PDGFB/ARG1/NOX4/VTN/SMAD4/CCL2/CASP3/COL3A1/ENG/TGFB3/FGF7/FOS/HSPA5/FGF2/CAV1/TNFRSF1B/MAPK3/RELA/HIF1A/VCAM…	77	BP
GO:0051093	negative regulation of developmental process	92/415	1017/17910	1.63519599005207e-30	4.25982413001701e-29	1.62265122152893e-29	XDH/IGF1/SEMA4D/LEP/DGUOK/FOXP3/APOE/PTK2/BCL2/AGT/CRP/RARB/NFE2L2/PPARGC1A/SNAI1/TNF/ITGB1/LDLR/SHH/SPP1/F2/WNT5A/BMP7/B2M/CTNNB1/CCND1/TGFB1/MYC/NKX2-1/IL13/FOXO1/STAT1/IGFBP5/ANXA2/BRCA2/MAPK1/MDM2/EGFR/APOH/IL4/TERT/CETP/CXCL10/TP53/CDKN1A/SIRT1/IL1B/NFKBIA/TLR2/NME1/TWIST1/HMGB1/TGFB2/PTEN/IRF1/SMAD3/IFNA2/EZH2/TNFRSF11B/KRAS/PPARG/RHOA/SMAD7/PDGFB/VIM/CALR/NR1H2/STAT3/ADRB2/SMAD4/IL6/COL3A1…	92	BP
GO:0034774	secretory granule lumen	53/415	321/18675	7.71607414405242e-31	4.44024993925926e-29	2.51787682595395e-29	IGF1/ELANE/C3/TF/ALAD/HSPA8/GSTP1/FN1/HP/EGF/B2M/VEGFA/TGFB1/VCP/ANXA2/INS/MMP8/MAPK1/APOH/PDGFA/PLG/CAT/IDH1/NFKB1/ALB/HGF/HMGB1/TGFB2/ALOX5/SERPINA1/MAPK14/GSN/MPO/PDGFB/ARG1/SLPI/CAMP/PTX3/S100A8/HSP90AA1/TTR/TGFB3/IGF2/PYGL/RNASE3/LTF/CXCL1/SERPINE1/MIF/LCN2/SPARC/APOA1/S100A9	53	CC
GO:0006897	endocytosis	75/415	675/17910	1.83671466356126e-30	4.768632496442e-29	1.81646638668701e-29	LEP/APOE/C3/PTK2/TF/TFR2/EZR/CRP/HP/TNF/EGF/ITGB1/LDLR/SHH/SFTPD/WNT5A/B2M/VEGFA/TGFB1/MRC1/PCSK9/SLC11A1/PTPRC/CD14/ANXA2/CXCR1/MAPK1/SOD1/LGALS3/IL4/SRC/HBB/IL1B/ALB/TLR2/NME1/HMGB1/PTEN/TGM2/APOC3/CD36/LBP/CXCR2/TSC2/PPARG/CXCL8/SELE/GSN/CALR/ATG5/NR1H2/VTN/PTX3/ADRB2/SCARB1/TFRC/CCL2/HSP90AA1/PECAM1/LYN/PIK3CG/PIK3CA/CAV1/MAPK3/HSP90B1/CD81/ACTB/TLR4/SERPINE1/INSR/TGFBR2/CANX/SPARC/APOA1/ADIP…	75	BP
GO:0045087	innate immune response	86/415	893/17910	2.05086364291004e-30	5.30669599183962e-29	2.02142540880128e-29	EDN1/EP300/NOS2/LEP/APOE/C3/HSPD1/ASS1/IRF3/CREBBP/JAK2/SFTPD/XIAP/WNT5A/B2M/AGER/ESR1/PSMB8/TGFB1/MRC1/SLC11A1/TNFAIP3/STAT1/MMP12/CR1/CD14/EIF2AK2/INS/IKBKB/TLR7/LGALS3/SRC/CCL5/TP53/CLDN1/NFKB1/NFKBIA/NOD2/HLA-C/TLR2/HAVCR2/HMGB1/IL12RB1/IRF1/NLRP3/PTPN11/IFNA2/CSF1/CD36/LBP/CASP8/KRAS/PPARG/RAF1/GSN/VIM/HLA-A/CHUK/NR1H2/ARG1/SLPI/CAMP/PTX3/S100A8/CCL2/LYN/RNASE3/PIK3CG/IFNG/ICAM1/CAV1/LTF/HSP…	86	BP
GO:0051222	positive regulation of protein transport	59/415	403/17910	2.18321206084612e-30	5.63019620389342e-29	2.144653034692e-29	IGF1/LEP/GCK/IRF3/EZR/IL5/HPS4/BMP6/TNF/IL1A/SHH/JAK2/WNT5A/PTGS2/AGER/TGFB1/IL13/MMP12/CD14/INS/MMP8/IL10/MAPK1/MDM2/EGFR/SRC/TP53/LPL/IL1B/NOD2/TLR2/HAVCR2/AGTR2/TWIST1/HMGB1/TGFB2/NLRP3/SMAD3/IL17A/MAPK14/CHUK/IL6/CD34/TGFB3/RBP4/IL2/CDH1/IFNG/GLUL/MAPK3/CD81/HIF1A/CFTR/NR1H4/TLR4/MIF/CCL3/KCNN4/CD274	59	BP
GO:0019899	enzyme binding	135/412	1941/16967	1.56359555124994e-31	5.66021589552479e-29	3.58255401742531e-29	HSPB1/CXCR4/MET/UGT1A1/BRCA1/CYP2C19/ELANE/COL1A1/FOXP3/BIRC5/HSPD1/PTK2/BCL2/CYP1A1/EZR/HPS4/HSPA8/GSTP1/FN1/PPARGC1A/SNAI1/PDGFRB/TNF/EGF/ITGB1/LDLR/JAK2/PTGS2/CBS/CTNNB1/CCND1/ESR1/TGFB1/NKX2-1/VCP/TNFAIP3/FOXO1/STAT1/PTPRC/HMGCR/ANXA2/HMOX1/INS/EXOC4/SMAD2/BRCA2/GSTM1/MAPK1/MDM2/EGFR/IKBKB/SOD1/CREB1/LGALS3/MAPK8/SRC/PLG/TP53/CDKN1A/CAT/SIRT1/NFKBIA/SREBF1/NOD2/NME1/COL1A2/HMGB1/PTEN/AXIN1/DS…	135	MF
GO:0002793	positive regulation of peptide secretion	50/415	275/17910	2.36664740654892e-30	6.08283789944096e-29	2.31707320458108e-29	IGF1/GCK/TFR2/IRF3/EZR/IL5/BMP6/TNF/IL1A/JAK2/WNT5A/AGER/TGFB1/IL13/MMP12/CD14/INS/MMP8/IL10/EGFR/SRC/LPL/IL1B/NOD2/TLR2/HAVCR2/AGTR2/TWIST1/HMGB1/TGFB2/NLRP3/IL17A/MAPK14/CHUK/S100A8/IL6/CD34/TGFB3/RBP4/IL2/GLUL/MAPK3/HIF1A/CFTR/NR1H4/TLR4/MIF/CCL3/KCNN4/CD274	50	BP
GO:0010469	regulation of signaling receptor activity	70/415	588/17910	2.84526976303788e-30	7.2886327096487e-29	2.77638428456433e-29	EDN1/IGF1/LEP/IL5/AGT/BMP6/PPARGC1A/TNF/EGF/IL1A/ITGB1/SHH/THPO/SPP1/F2/WNT5A/BMP7/VEGFA/TGFB1/PCSK9/IL13/CCL11/INS/IL10/CXCL2/PDGFA/IL4/SCT/BMP1/SRC/GFER/CXCL10/CCL5/IL1B/HAMP/AGTR2/EPO/HGF/TYMP/TGFB2/PLAU/PTEN/IFNA2/CSF1/TNFRSF11B/CALCA/CXCL8/IL17A/PDGFB/CSF3/ADRB2/CCL2/IL6/TTR/TGFB3/IGF2/FGF7/IL2/IFNG/FGF2/CXCL12/CXCL1/SERPINE1/MIF/LTA/IFNB1/CCL3/CD40LG/CSF2/ADIPOQ	70	BP
GO:0070663	regulation of leukocyte proliferation	45/415	214/17910	3.08708139286531e-30	7.88180083195014e-29	3.00233374840302e-29	MPL/IGF1/LEP/FOXP3/BCL2/IL5/GSTP1/SHH/SFTPD/AGER/CTNNB1/TGFB1/IL13/TNFAIP3/PTPRC/IL10/LGALS3/IL4/CCL5/CDKN1A/IL1B/HAVCR2/EPO/HMGB1/IL12RB1/IRF1/CSF1/ARG1/TFRC/ADA/IL6/CASP3/LYN/IGF2/IL2/TNFRSF1B/CD81/TLR4/VCAM1/TGFBR2/TLR9/MIF/CEBPB/CD274/CD40LG	45	BP
GO:0006869	lipid transport	54/415	332/17910	3.43191845506166e-30	8.73320971097645e-29	3.32665222151498e-29	EDN1/NOS2/LEP/APOE/AGT/BMP6/EGF/LDLR/ABCC2/SHH/SPP1/SLCO1B1/PCSK9/ANXA2/ABCD3/SLC10A1/APOH/CETP/ABCB11/NFKB1/SIRT1/ABCC1/IL1B/REN/NFKBIA/CPT1A/AGTR2/SLCO1B3/RXRA/PTPN11/APOC3/CD36/LBP/PPARG/MTTP/ABCB1/NR1H2/AGTR1/SCARB1/CPT2/ACE/PRKAA2/PPARA/RBP4/FABP1/CAV1/ABCB4/CFTR/NR1H4/AKT1/MIF/APOA1/KCNN4/ADIPOQ	54	BP
GO:0002696	positive regulation of leukocyte activation	52/415	305/17910	4.04132211762928e-30	1.02500199584096e-28	3.90443522985132e-29	MPL/IGF1/LEP/FOXP3/HSPD1/BCL2/IL5/SHH/WNT5A/AGER/TGFB1/IL13/CCR7/PTPRC/MMP8/IL10/MMP14/IL4/SRC/CCL5/CDKN1A/IL1B/NOD2/HAVCR2/EPO/HMGB1/IL12RB1/NLRP3/PTPN11/LBP/RHOA/TFRC/CCL2/ADA/IL6/LYN/IGF2/CD80/PIK3CA/IL2/IFNG/CAV1/CD81/TLR4/VCAM1/TGFBR2/TLR9/AKT1/MIF/CCL3/CD274/CD40LG	52	BP
GO:0010556	regulation of macromolecule biosynthetic process	193/415	3877/17910	4.74193169332037e-30	1.19874161391997e-28	4.56624378086009e-29	EDN1/HSPB1/IGF1/EP300/SOD2/SEMA4D/FGFR1/MET/LEP/BRCA1/ELANE/COL1A1/FOXP3/BIRC5/APOE/AIRE/HSPD1/BCL2/GCK/TFR2/IRF3/EZR/IL5/AGT/PKHD1/HSPA8/GSTP1/TCF4/NFE2L2/NR1I3/BMP6/PPARGC1A/SNAI1/PDGFRB/TNF/EGF/IL1A/CREBBP/SHH/JAK2/TNFRSF1A/SPP1/SFTPD/XIAP/WNT5A/BMP7/AGER/CTNNB1/CCND1/NOTCH2/ESR1/TYMS/PSMB8/VEGFA/TGFB1/MYC/NKX2-1/SLC11A1/TNFAIP3/FOXO1/STAT1/GCLC/IGFBP5/MMP12/CCR7/PTPRC/EIF2AK2/HMOX1/INS/SMAD2/…	193	BP
GO:0001525	angiogenesis	69/415	576/17910	5.27812588642292e-30	1.32991467007082e-28	5.06590788270652e-29	MMP2/EDN1/HSPB1/CXCR4/FGFR1/LEP/BRCA1/C3/PTK2/EDNRA/AGT/FN1/NFE2L2/PDGFRB/EGF/IL1A/ITGB1/SHH/WNT5A/PTGS2/CTNNB1/VEGFA/TNFAIP3/STAT1/ANXA2/CCL11/HMOX1/IL10/MMP14/APOH/PDGFA/TERT/CXCL10/SIRT1/IL1B/TWIST1/HGF/TYMP/TGFB2/PTEN/CXCR2/PPARG/RHOA/CXCL8/MAPK14/STAT3/AGTR1/CCL2/IL6/CD34/ENG/PECAM1/PIK3CG/SP1/PIK3CA/FGF2/GLUL/CAV1/HIF1A/NOS3/SERPINE1/TGFBR2/JAK1/AKT1/SPARC/F3/JUN/NOTCH1/PRKCA	69	BP
GO:0048660	regulation of smooth muscle cell proliferation	41/415	172/17910	6.23237386181491e-30	1.56522199764861e-28	5.96224001021921e-29	MMP2/EDN1/IGF1/SOD2/ELANE/AGT/GSTP1/PPARGC1A/PDGFRB/TNF/JAK2/PTGS2/CTNNB1/IL13/TNFAIP3/STAT1/IGFBP5/HMGCR/HMOX1/IL10/MDM2/EGFR/TERT/CCL5/CDKN1A/IGFBP3/PTEN/TGM2/PPARG/MTOR/PDGFB/ELN/IL6/TGFB3/IFNG/FGF2/TGFBR2/AKT1/JUN/MMP9/ADIPOQ	41	BP
GO:0019219	regulation of nucleobase-containing compound metabolic process	192/415	3853/17910	6.6545676603113e-30	1.66580952669356e-28	6.34539779301413e-29	EDN1/HSPB1/IGF1/EP300/SOD2/SEMA4D/FGFR1/MET/LEP/BRCA1/ELANE/COL1A1/FOXP3/BIRC5/APOE/AIRE/HSPD1/GPD1/GCK/TFR2/IRF3/EZR/IL5/AGT/PKHD1/HSPA8/TCF4/NFE2L2/NR1I3/BMP6/PPARGC1A/SNAI1/PDGFRB/TNF/EGF/IL1A/CREBBP/SHH/JAK2/TNFRSF1A/SPP1/XIAP/WNT5A/BMP7/AGER/CTNNB1/CCND1/NOTCH2/ESR1/TYMS/PSMB8/VEGFA/TGFB1/MYC/NKX2-1/VCP/SLC11A1/TNFAIP3/FOXO1/STAT1/GCLC/MMP12/PTPRC/EIF2AK2/HMOX1/INS/SMAD2/BRCA2/IL10/MAPK1/MDM…	192	BP
GO:0050663	cytokine secretion	46/415	230/17910	7.08366780190158e-30	1.76746711226018e-28	6.73263163263442e-29	NOS2/LEP/FOXP3/IRF3/EZR/AGT/CRP/FN1/TNF/IL1A/WNT5A/AGER/TNFAIP3/MMP12/CCR7/CD14/INS/MMP8/IL10/SRC/LPL/IL1B/NOD2/TLR2/HAVCR2/AGTR2/TWIST1/HMGB1/NLRP3/IFNA2/CD36/IL17A/MAPK14/ATG5/CHUK/CD34/LYN/TNFRSF1B/MAPK3/NR1H4/TLR4/TLR9/MIF/APOA1/CCL3/CD274	46	BP
GO:0050714	positive regulation of protein secretion	48/415	256/17910	8.48379626294742e-30	2.10996680520229e-28	8.03728067016071e-29	IGF1/GCK/IRF3/EZR/IL5/BMP6/TNF/IL1A/JAK2/WNT5A/AGER/TGFB1/IL13/MMP12/CD14/INS/MMP8/IL10/EGFR/SRC/LPL/IL1B/NOD2/TLR2/HAVCR2/AGTR2/TWIST1/HMGB1/TGFB2/NLRP3/IL17A/MAPK14/CHUK/IL6/CD34/TGFB3/RBP4/IL2/GLUL/MAPK3/HIF1A/CFTR/NR1H4/TLR4/MIF/CCL3/KCNN4/CD274	48	BP
GO:0046651	lymphocyte proliferation	47/415	244/17910	9.7004678347315e-30	2.40477726806166e-28	9.16027200284832e-29	MPL/IGF1/LEP/FOXP3/HSPD1/BCL2/IL5/SHH/SFTPD/AGER/CTNNB1/TGFB1/IL13/SLC11A1/PTPRC/IL10/LGALS3/IL4/CCL5/TP53/CDKN1A/IL1B/HAVCR2/EPO/HMGB1/IL12RB1/IRF1/ARG1/TFRC/ADA/IL6/CASP3/IGF2/PIK3CG/IL2/TNFRSF1B/CD81/TLR4/VCAM1/TGFBR2/TLR9/MIF/IFNB1/CEBPB/CD274/BAX/CD40LG	47	BP
GO:0048659	smooth muscle cell proliferation	41/415	174/17910	1.02516129723662e-29	2.53323619590464e-28	9.64959745342712e-29	MMP2/EDN1/IGF1/SOD2/ELANE/AGT/GSTP1/PPARGC1A/PDGFRB/TNF/JAK2/PTGS2/CTNNB1/IL13/TNFAIP3/STAT1/IGFBP5/HMGCR/HMOX1/IL10/MDM2/EGFR/TERT/CCL5/CDKN1A/IGFBP3/PTEN/TGM2/PPARG/MTOR/PDGFB/ELN/IL6/TGFB3/IFNG/FGF2/TGFBR2/AKT1/JUN/MMP9/ADIPOQ	41	BP
GO:0098657	import into cell	78/415	751/17910	1.05244707589733e-29	2.59232556995864e-28	9.87468056029172e-29	LEP/APOE/C3/PTK2/TF/TFR2/EZR/AGT/CRP/HP/TNF/EGF/ITGB1/LDLR/SHH/SFTPD/WNT5A/B2M/VEGFA/TGFB1/MRC1/PCSK9/SLC11A1/PTPRC/CD14/ANXA2/CXCR1/MAPK1/SOD1/LGALS3/IL4/SRC/HBB/IL1B/ALB/TLR2/NME1/HMGB1/PTEN/TGM2/NOS1/APOC3/CD36/LBP/CXCR2/TSC2/PPARG/CXCL8/SELE/GSN/CALR/ATG5/NR1H2/VTN/PTX3/ADRB2/SCARB1/TFRC/CCL2/HSP90AA1/PECAM1/LYN/PIK3CG/PIK3CA/GLUL/CAV1/MAPK3/HSP90B1/CD81/ACTB/TLR4/SERPINE1/INSR/TGFBR2/CANX/SP…	78	BP
GO:0017144	drug metabolic process	80/415	792/17910	1.19810004929712e-29	2.94166098365763e-28	1.12053682095016e-28	EDN1/IGF1/NOS2/UGT1A1/CYP2D6/CYP2C19/ALDH2/GPD1/GCK/ASS1/CYP1A1/AGT/HSPA8/TPMT/HP/PPARGC1A/CYP3A5/TNF/ABCC2/JAK2/PTGS2/CBS/CYP2C9/TYMS/TGFB1/VCP/FH/GGT1/INS/MMP3/MMP8/IL10/EGFR/SOD1/HBB/TP53/CAT/IDH1/ABCC1/IL1B/AGXT/TLR2/AGTR2/TGFB2/NOS1/PKD2/MTHFR/SMAD3/CD36/RHOA/AFP/MTOR/SLC25A13/MPO/STAT3/CYP2E1/PTX3/ADA/HSP90AA1/CD34/PRKAA2/PPARA/CYP1A2/SP1/IFNG/ICAM1/CAV1/FAH/HIF1A/NOS3/MAT1A/TLR4/INSR/AKT1/…	80	BP
GO:0009894	regulation of catabolic process	86/415	916/17910	1.30960214235948e-29	3.20518868281293e-28	1.2209197311102e-28	HSPB1/IGF1/EP300/NOS2/MET/LEP/APOE/PTK2/BCL2/GPD1/GCK/ALAD/EZR/HSPA8/NFE2L2/HP/PPARGC1A/TNF/EGF/ITGB1/LDLR/SHH/WNT5A/PSMB8/PCSK9/VCP/SLC11A1/TNFAIP3/FOXO1/GCLC/HMGCR/ANXA2/HMOX1/INS/EXOC4/IL10/MDM2/EGFR/IL4/SCT/MAPK8/TP53/IDH1/SIRT1/IL1B/CPT1A/SREBF1/TWIST1/HGF/HMGB1/PTEN/AXIN1/PKD1/SMAD3/APOC3/TSC2/MTOR/MAPK14/SMAD7/VIM/STAT3/ADRB2/DKC1/SCARB1/IL6/HSP90AA1/CASP3/PRKAA2/PPARA/FABP1/PIK3CG/PIK3CA/…	86	BP
GO:0045834	positive regulation of lipid metabolic process	38/415	144/17910	1.36385155239222e-29	3.32736481909022e-28	1.26745903665923e-28	APOE/PTK2/AGT/BMP6/PPARGC1A/PDGFRB/TNF/LDLR/TNFRSF1A/F2/PTGS2/TGFB1/CCR7/INS/CREB1/SCT/SRC/IL1B/CPT1A/SREBF1/NOD2/TWIST1/PPARG/MTOR/PDGFB/NR1H2/AGTR1/SCARB1/PPARA/LYN/FABP1/IFNG/FGF2/CD81/NR1H4/AKT1/APOA1/ADIPOQ	38	BP
GO:1903706	regulation of hemopoiesis	62/415	468/17910	2.02792142641669e-29	4.93182789937096e-28	1.87863074179374e-28	MPL/EP300/FOXP3/GNAS/IL5/NFE2L2/TNF/CREBBP/SHH/THPO/B2M/AGER/CTNNB1/NOTCH2/PSMB8/TGFB1/MYC/STAT1/CR1/PTPRC/EIF2AK2/BGLAP/MMP14/SOD1/CREB1/LGALS3/IL4/NFKBIA/NME1/HMGB1/IL12RB1/IRF1/NLRP3/IFNA2/CSF1/CASP8/RHOA/IL17A/MTOR/MAPK14/SMAD7/STAT3/ADA/ACE/LYN/CD80/IL2/FOS/IFNG/LTF/HIF1A/TLR4/TGFBR2/TLR9/IFNB1/CEBPB/CCL3/JUN/NOTCH1/PRKCA/CSF2/ADIPOQ	62	BP
GO:0009612	response to mechanical stimulus	43/415	200/17910	2.37597522868206e-29	5.76005351180492e-28	2.19411825036188e-28	EDN1/CXCR4/MMP7/COL1A1/AGT/BMP6/TNFRSF1A/PTGS2/TGFB1/IL13/STAT1/GCLC/BGLAP/MMP14/EGFR/TLR7/MAPK8/SRC/CXCL10/NFKB1/IL1B/NFKBIA/IRF1/PKD1/PKD2/PTPN11/FAS/CASP8/PPARG/RHOA/MAPK14/RAF1/MPO/COL3A1/ENG/FOS/CXCL12/MAPK3/RELA/TLR4/TGFBR2/AKT1/JUN	43	BP
GO:0032870	cellular response to hormone stimulus	72/415	646/17910	2.59680527586513e-29	6.2756127500074e-28	2.39050495603473e-28	EDN1/EP300/UGT1A1/LEP/BRCA1/PTK2/GCK/ASS1/AGT/RARB/GSTP1/NFE2L2/NR1I3/PPARGC1A/ABCC2/JAK2/SPP1/BMP7/CTNNB1/ESR1/TGFB1/PCSK9/FOXO1/STAT1/GCLC/INS/BGLAP/IL10/MDM2/EGFR/CREB1/BBS4/SRC/LPL/NFKB1/SIRT1/IL1B/REN/SREBF1/AGTR2/PTEN/AXIN1/RXRA/PTPN11/TSC2/PPARG/RHOA/NR3C1/CALR/NR1H2/STAT3/ARG1/AGTR1/VDR/PRKAA2/PPARA/LYN/IGF2/SP1/PIK3CA/FOS/NR5A2/ICAM1/CAV1/HNF4A/RELA/NR1H4/INSR/AKT1/NR1I2/NOTCH1/ADIPOQ	72	BP
GO:0012505	endomembrane system	197/415	4213/18675	1.3442611976817e-29	7.09097781777098e-28	4.02099182815316e-28	ABCA3/XDH/EDN1/CXCR4/MPL/IGF1/UGT1A1/CYP2D6/CYP2C19/ELANE/COL1A1/APOE/C3/HSPD1/BCL2/TF/GUCY2C/ASS1/ALAD/CYP1A1/EZR/HPS4/HSPA8/GSTP1/FN1/NFE2L2/GAA/HP/ATP7B/CYP3A5/PDGFRB/TNF/EGF/ITGB1/LDLR/SHH/JAK2/TNFRSF1A/SPP1/SFTPD/F2/WNT5A/PTGS2/B2M/CYP2C9/NOTCH2/ESR1/VEGFA/TGFB1/MRC1/PCSK9/VCP/SLC11A1/IGFBP5/CR1/PTPRC/CD14/HMGCR/ANXA2/HMOX1/INS/BGLAP/PNPLA3/BRCA2/CXCR1/MMP8/MAPK1/MMP14/PLAT/EGFR/SOD1/APOH/TL…	197	CC
GO:2001141	regulation of RNA biosynthetic process	175/415	3348/17910	4.63388334647513e-29	1.1163446243781e-27	4.25237735903228e-28	EDN1/IGF1/EP300/SOD2/SEMA4D/FGFR1/MET/LEP/BRCA1/ELANE/COL1A1/FOXP3/BIRC5/APOE/AIRE/HSPD1/TFR2/IRF3/EZR/IL5/AGT/PKHD1/HSPA8/TCF4/NFE2L2/NR1I3/BMP6/PPARGC1A/SNAI1/TNF/EGF/IL1A/CREBBP/SHH/JAK2/TNFRSF1A/SPP1/XIAP/WNT5A/BMP7/AGER/CTNNB1/CCND1/NOTCH2/ESR1/TYMS/PSMB8/VEGFA/TGFB1/MYC/NKX2-1/SLC11A1/TNFAIP3/FOXO1/STAT1/GCLC/MMP12/EIF2AK2/HMOX1/INS/SMAD2/BRCA2/IL10/MAPK1/MDM2/EGFR/IKBKB/CREB1/IL4/MAPK8/TER…	175	BP
GO:0043436	oxoacid metabolic process	93/415	1091/17910	7.19383415609976e-29	1.72764423405083e-27	6.58093841714258e-28	EDN1/IGF1/NOS2/UGT1A1/LEP/BRCA1/CYP2D6/CYP2C19/C3/GPD1/GCK/ASS1/CYP1A1/GSTP1/PPARGC1A/EGF/ABCC2/TNFRSF1A/PTGS2/CBS/CYP2C9/TYMS/PSMB8/TGFB1/GPT/GCLC/FH/ABCD3/GGT1/INS/PNPLA3/ACADM/AKR1D1/HADHB/TP53/LPL/ABCB11/HADHA/IDH1/NFKB1/SIRT1/ABCC1/IL1B/AGXT/CPT1A/SREBF1/TLR2/TWIST1/HGF/ALOX5/FASN/FARSB/NOS1/MTHFR/APOC3/CD36/PPARG/MTOR/MAPK14/MPO/PDGFB/NR1H2/STAT3/ARG1/NOX4/CYP2E1/UGT1A6/CPT2/PRKAA2/PPARA/UG…	93	BP
GO:0051172	negative regulation of nitrogen compound metabolic process	139/415	2271/17910	8.38710765089473e-29	2.00794150458336e-27	7.64864613121438e-28	XDH/EDN1/HSPB1/IGF1/EP300/NOS2/SEMA4D/FGFR1/LEP/BRCA1/ELANE/FOXP3/BIRC5/APOE/C3/ALAD/EZR/HSPA8/GSTP1/NR1I3/BMP6/PPARGC1A/SNAI1/TNF/CREBBP/LDLR/SHH/SFTPD/F2/XIAP/WNT5A/PTGS2/BMP7/CTNNB1/CCND1/ESR1/TYMS/VEGFA/TGFB1/MYC/NKX2-1/SLC11A1/TNFAIP3/FOXO1/STAT1/GCLC/IGFBP5/MMP12/CR1/PTPRC/HMGCR/ANXA2/EIF2AK2/INS/SMAD2/BRCA2/IL10/PLAT/MDM2/EGFR/IKBKB/CREB1/LGALS3/IL4/TERT/SRC/TP53/CDKN1A/NFKB1/SIRT1/IL1B/IG…	139	BP
GO:0030545	receptor regulator activity	61/412	425/16967	7.67311588028743e-30	2.08325096149804e-27	1.31856438679676e-27	EDN1/IGF1/IL5/AGT/BMP6/TNF/EGF/IL1A/SHH/THPO/SPP1/F2/WNT5A/BMP7/VEGFA/TGFB1/PCSK9/IL13/CCL11/INS/IL10/LGALS3/PDGFA/IL4/SCT/BMP1/GFER/CXCL10/CCL5/IL1B/HAMP/AGTR2/EPO/HGF/TYMP/HMGB1/TGFB2/CSF1/TNFRSF11B/CALCA/CXCL8/IL17A/PDGFB/CSF3/IL6/TTR/TGFB3/IGF2/FGF7/IL2/FGF2/CXCL12/CXCL1/MIF/APOA1/LTA/IFNB1/CCL3/CD40LG/CSF2/ADIPOQ	61	MF
GO:0034599	cellular response to oxidative stress	50/415	296/17910	8.72962702807412e-29	2.08345291027173e-27	7.93628400296637e-28	MMP2/HSPB1/SOD2/MET/BCL2/GSTP1/NFE2L2/PPARGC1A/TNF/JAK2/BMP7/CTNNB1/TNFAIP3/FOXO1/HMOX1/INS/MMP3/IL10/MAPK1/MDM2/EGFR/SOD1/MAPK8/SRC/TP53/CAT/SIRT1/HGF/PKD2/EZH2/CD36/MPO/PCNA/CHUK/ARG1/NOX4/IL6/PRKAA2/FABP1/FOS/MAPK3/RELA/HIF1A/NOS3/TLR4/AKT1/LCN2/TXN/JUN/MMP9	50	BP
GO:0048018	receptor ligand activity	59/412	397/16967	1.05658388309116e-29	2.29490019407401e-27	1.45252479086006e-27	EDN1/IGF1/IL5/AGT/BMP6/TNF/EGF/IL1A/SHH/THPO/SPP1/F2/WNT5A/BMP7/VEGFA/TGFB1/IL13/CCL11/INS/IL10/LGALS3/PDGFA/IL4/SCT/BMP1/GFER/CXCL10/CCL5/IL1B/HAMP/EPO/HGF/TYMP/HMGB1/TGFB2/CSF1/TNFRSF11B/CALCA/CXCL8/IL17A/PDGFB/CSF3/IL6/TTR/TGFB3/IGF2/FGF7/IL2/FGF2/CXCL12/CXCL1/MIF/APOA1/LTA/IFNB1/CCL3/CD40LG/CSF2/ADIPOQ	59	MF
GO:1903409	reactive oxygen species biosynthetic process	35/415	122/17910	1.03085055750293e-28	2.45265836978639e-27	9.34266058470151e-28	EDN1/NOS2/ASS1/CYP1A1/AGT/TNF/JAK2/PTGS2/INS/MMP8/IL10/SOD1/HBB/IL1B/AGTR2/NOS1/PKD2/SMAD3/CD36/RHOA/MTOR/MPO/STAT3/NOX4/PTX3/HSP90AA1/CD34/CYP1A2/IFNG/ICAM1/CAV1/NOS3/TLR4/INSR/AKT1	35	BP
GO:0050731	positive regulation of peptidyl-tyrosine phosphorylation	41/415	184/17910	1.11465189504006e-28	2.64385796709347e-27	1.00709776481689e-27	IGF1/SEMA4D/LEP/IL5/AGT/TNF/EGF/JAK2/TNFRSF1A/VEGFA/TGFB1/IL13/PTPRC/IL4/SRC/CCL5/TP53/EPO/HGF/IFNA2/CD36/MTOR/PDGFB/CSF3/STAT3/NOX4/VTN/IL6/ACE/PECAM1/LYN/IGF2/CD80/FGF7/IL2/IFNG/ICAM1/CD81/MIF/CSF2/ADIPOQ	41	BP
GO:0051251	positive regulation of lymphocyte activation	47/415	258/17910	1.31813678193743e-28	3.11688651359667e-27	1.18728368925279e-27	MPL/IGF1/LEP/FOXP3/HSPD1/BCL2/IL5/SHH/AGER/TGFB1/IL13/CCR7/PTPRC/MMP14/IL4/SRC/CCL5/CDKN1A/IL1B/NOD2/HAVCR2/EPO/HMGB1/IL12RB1/NLRP3/PTPN11/RHOA/TFRC/CCL2/ADA/IL6/LYN/IGF2/CD80/PIK3CA/IL2/IFNG/CAV1/CD81/TLR4/VCAM1/TGFBR2/TLR9/AKT1/MIF/CD274/CD40LG	47	BP
GO:1903561	extracellular vesicle	133/415	2185/18675	6.54855557997221e-29	3.18864283240185e-27	1.80814368645386e-27	HSPB1/CXCR4/MMP7/SOD2/ELANE/GNAS/APOE/ALDH2/C3/HSPD1/GPD1/TF/ASS1/ALAD/ACTC1/EZR/AGT/PKHD1/HSPA8/GSTP1/FN1/GAA/HP/EGF/ITGB1/KRT8/SPP1/F2/WNT5A/B2M/CTNNB1/ACE2/SCNN1B/PSMB8/VCP/TNFAIP3/GPT/CR1/SLC22A5/PTPRC/CD14/ANXA2/FH/GGT1/ASL/PLAT/SOD1/APOH/LGALS3/CETP/SRC/HBB/PLG/UMOD/CAT/ABCB11/IDH1/ABCC1/IL1B/ALB/SCNN1G/NME1/COL1A2/DNASE1/PLAU/DSP/PKD1/FASN/TGM2/PKD2/APOC3/FAS/LBP/HSPA4/RHOA/SERPINA1/ABCB1/…	133	CC
GO:0043062	extracellular structure organization	56/415	387/17910	1.37149290569886e-28	3.23310520867968e-27	1.23155368768116e-27	MMP2/MMP7/ELANE/COL1A1/APOE/PTK2/AGT/FN1/TNF/ITGB1/TNFRSF1A/SPP1/BMP7/TGFB1/MMP1/MMP12/MMP3/MMP8/MMP14/PDGFA/BMP1/CETP/PLG/LPL/ALB/COL1A2/TGFB2/SMAD3/APOC3/TNFRSF11B/CD36/MTTP/MPO/PDGFB/ELN/VTN/AGTR1/PTX3/SCARB1/IL6/CD34/COL3A1/ENG/PECAM1/TTR/CDH1/FGF2/ICAM1/TNFRSF1B/SERPINE1/VCAM1/SPARC/APOA1/NOTCH1/PRSS1/MMP9	56	BP
GO:0043230	extracellular organelle	133/415	2187/18675	7.17535696814755e-29	3.24428640059814e-27	1.83969678657016e-27	HSPB1/CXCR4/MMP7/SOD2/ELANE/GNAS/APOE/ALDH2/C3/HSPD1/GPD1/TF/ASS1/ALAD/ACTC1/EZR/AGT/PKHD1/HSPA8/GSTP1/FN1/GAA/HP/EGF/ITGB1/KRT8/SPP1/F2/WNT5A/B2M/CTNNB1/ACE2/SCNN1B/PSMB8/VCP/TNFAIP3/GPT/CR1/SLC22A5/PTPRC/CD14/ANXA2/FH/GGT1/ASL/PLAT/SOD1/APOH/LGALS3/CETP/SRC/HBB/PLG/UMOD/CAT/ABCB11/IDH1/ABCC1/IL1B/ALB/SCNN1G/NME1/COL1A2/DNASE1/PLAU/DSP/PKD1/FASN/TGM2/PKD2/APOC3/FAS/LBP/HSPA4/RHOA/SERPINA1/ABCB1/…	133	CC
GO:0070062	extracellular exosome	132/415	2162/18675	8.55993424024108e-29	3.61229224938173e-27	2.0483772462612e-27	HSPB1/CXCR4/MMP7/SOD2/ELANE/GNAS/APOE/ALDH2/C3/HSPD1/GPD1/TF/ASS1/ALAD/ACTC1/EZR/AGT/PKHD1/HSPA8/GSTP1/FN1/GAA/HP/EGF/ITGB1/KRT8/SPP1/F2/WNT5A/B2M/CTNNB1/ACE2/SCNN1B/PSMB8/VCP/TNFAIP3/GPT/CR1/SLC22A5/PTPRC/CD14/ANXA2/FH/GGT1/ASL/PLAT/SOD1/APOH/LGALS3/CETP/SRC/HBB/PLG/UMOD/CAT/ABCB11/IDH1/ABCC1/IL1B/ALB/SCNN1G/NME1/COL1A2/DNASE1/PLAU/DSP/PKD1/FASN/TGM2/PKD2/APOC3/FAS/LBP/HSPA4/RHOA/SERPINA1/ABCB1/…	132	CC
GO:0022603	regulation of anatomical structure morphogenesis	93/415	1102/17910	1.54564196047595e-28	3.63249494380968e-27	1.38368913313491e-27	XDH/EDN1/HSPB1/CXCR4/MPL/SEMA4D/FGFR1/LEP/BRCA1/APOE/C3/PTK2/BCL2/EZR/AGT/FN1/NFE2L2/PPARGC1A/TNF/IL1A/ITGB1/SHH/TNFRSF1A/SPP1/F2/WNT5A/PTGS2/BMP7/CTNNB1/ESR1/PSMB8/VEGFA/TGFB1/MYC/TNFAIP3/STAT1/CCL11/HMOX1/TUBB2B/IL10/APOH/PDGFA/TERT/SRC/CXCL10/SIRT1/IL1B/AGTR2/TWIST1/HGF/TGFB2/PTEN/RXRA/CSF1/TNFRSF11B/CD36/CXCR2/PPARG/RHOA/CXCL8/MTOR/MAPK14/CALR/STAT3/AGTR1/SMAD4/CCL2/ADA/IL6/VDR/CD34/ENG/FGF7/…	93	BP
GO:0043434	response to peptide hormone	57/415	404/17910	1.65368980504178e-28	3.87457504626405e-27	1.47590222972439e-27	EDN1/LEP/COL1A1/PTK2/GCK/ASS1/AGT/GSTP1/NFE2L2/ABCC2/JAK2/PTGS2/BMP7/TGFB1/PCSK9/FOXO1/STAT1/GCLC/IGFBP5/INS/BGLAP/IL10/MDM2/CREB1/SRC/LPL/CAT/HADHA/NFKB1/SIRT1/IL1B/SREBF1/TLR2/AGTR2/PTEN/PTPN11/TSC2/PPARG/MTOR/CHUK/STAT3/ARG1/AGTR1/PPARA/LYN/IGF2/SP1/PIK3CA/CXCL12/ICAM1/CAV1/RELA/NR1H4/INSR/AKT1/SPARC/ADIPOQ	57	BP
GO:0071705	nitrogen compound transport	130/415	2035/17910	1.75500671678508e-28	4.09946097826546e-27	1.56156572688508e-27	EDN1/ABCB7/HSPB1/IGF1/NOS2/LEP/COL1A1/FOXP3/APOE/TF/GCK/TFR2/IRF3/EZR/IL5/AGT/HPS4/CRP/HSPA8/FN1/BMP6/TNF/IL1A/ABCC2/SHH/JAK2/WNT5A/PTGS2/AGER/ACE2/TGFB1/VCP/IL13/SLC11A1/TNFAIP3/MMP12/CCR7/SLC22A5/CD14/HMGCR/INS/SMAD2/MMP8/IL10/MAPK1/MDM2/EGFR/BBS4/SRC/HBB/CCL5/TP53/CDKN1A/LPL/CAT/IDH1/ABCC1/IL1B/AGXT/NFKBIA/CPT1A/SREBF1/NOD2/TLR2/HAVCR2/AGTR2/TWIST1/HMGB1/TGFB2/NLRP3/PKD1/NOS1/PTPN11/SMAD3/IFNA…	130	BP
GO:0045596	negative regulation of cell differentiation	75/415	725/17910	1.98645963470412e-28	4.62604311900034e-27	1.76215127403896e-27	XDH/IGF1/SEMA4D/DGUOK/FOXP3/APOE/PTK2/BCL2/CRP/RARB/NFE2L2/SNAI1/TNF/ITGB1/LDLR/SHH/SPP1/F2/WNT5A/BMP7/B2M/CTNNB1/CCND1/TGFB1/MYC/NKX2-1/IL13/FOXO1/STAT1/IGFBP5/MAPK1/MDM2/EGFR/IL4/TERT/CETP/CXCL10/TP53/SIRT1/IL1B/NFKBIA/NME1/TWIST1/HMGB1/TGFB2/PTEN/IRF1/SMAD3/IFNA2/EZH2/KRAS/PPARG/RHOA/SMAD7/PDGFB/VIM/CALR/NR1H2/STAT3/SMAD4/IL6/COL3A1/PPARA/LYN/IL2/DDIT3/IFNG/CAV1/LTF/TLR4/IFNB1/CCL3/NOTCH1/MMP9…	75	BP
GO:0051252	regulation of RNA metabolic process	180/415	3552/17910	2.10673936745467e-28	4.89132689996652e-27	1.86320311047589e-27	EDN1/HSPB1/IGF1/EP300/SOD2/SEMA4D/FGFR1/MET/LEP/BRCA1/ELANE/COL1A1/FOXP3/BIRC5/APOE/AIRE/HSPD1/TFR2/IRF3/EZR/IL5/AGT/PKHD1/HSPA8/TCF4/NFE2L2/NR1I3/BMP6/PPARGC1A/SNAI1/TNF/EGF/IL1A/CREBBP/SHH/JAK2/TNFRSF1A/SPP1/XIAP/WNT5A/BMP7/AGER/CTNNB1/CCND1/NOTCH2/ESR1/TYMS/PSMB8/VEGFA/TGFB1/MYC/NKX2-1/SLC11A1/TNFAIP3/FOXO1/STAT1/GCLC/MMP12/EIF2AK2/HMOX1/INS/SMAD2/BRCA2/IL10/MAPK1/MDM2/EGFR/IKBKB/CREB1/IL4/MAP…	180	BP
GO:0006082	organic acid metabolic process	93/415	1109/17910	2.50123854926613e-28	5.78976453346693e-27	2.20543576585577e-27	EDN1/IGF1/NOS2/UGT1A1/LEP/BRCA1/CYP2D6/CYP2C19/C3/GPD1/GCK/ASS1/CYP1A1/GSTP1/PPARGC1A/EGF/ABCC2/TNFRSF1A/PTGS2/CBS/CYP2C9/TYMS/PSMB8/TGFB1/GPT/GCLC/FH/ABCD3/GGT1/INS/PNPLA3/ACADM/AKR1D1/HADHB/TP53/LPL/ABCB11/HADHA/IDH1/NFKB1/SIRT1/ABCC1/IL1B/AGXT/CPT1A/SREBF1/TLR2/TWIST1/HGF/ALOX5/FASN/FARSB/NOS1/MTHFR/APOC3/CD36/PPARG/MTOR/MAPK14/MPO/PDGFB/NR1H2/STAT3/ARG1/NOX4/CYP2E1/UGT1A6/CPT2/PRKAA2/PPARA/UG…	93	BP
GO:0018108	peptidyl-tyrosine phosphorylation	53/415	346/17910	2.5654737816972e-28	5.92062042412702e-27	2.25528136143509e-27	IGF1/SEMA4D/FGFR1/MET/LEP/PTK2/IL5/AGT/PDGFRB/TNF/EGF/JAK2/TNFRSF1A/VEGFA/TGFB1/IL13/PTPRC/EIF2AK2/EGFR/PDGFA/IL4/SRC/CCL5/TP53/EPO/HGF/IFNA2/CD36/MTOR/PDGFB/CSF3/STAT3/NOX4/VTN/IL6/ACE/PECAM1/LYN/IGF2/CD80/FGF7/IL2/IFNG/ICAM1/CAV1/MAPK3/CD81/SH2B3/INSR/JAK1/MIF/CSF2/ADIPOQ	53	BP
GO:0006355	regulation of transcription, DNA-templated	171/415	3266/17910	2.58254553633325e-28	5.94217438524582e-27	2.26349169131509e-27	EDN1/IGF1/EP300/SOD2/SEMA4D/FGFR1/MET/LEP/BRCA1/ELANE/COL1A1/FOXP3/BIRC5/APOE/AIRE/HSPD1/TFR2/IRF3/EZR/IL5/AGT/PKHD1/HSPA8/TCF4/NFE2L2/NR1I3/BMP6/PPARGC1A/SNAI1/TNF/EGF/IL1A/CREBBP/SHH/JAK2/TNFRSF1A/SPP1/XIAP/WNT5A/BMP7/AGER/CTNNB1/CCND1/NOTCH2/ESR1/TYMS/PSMB8/VEGFA/TGFB1/MYC/NKX2-1/SLC11A1/TNFAIP3/FOXO1/STAT1/GCLC/MMP12/EIF2AK2/HMOX1/INS/SMAD2/BRCA2/IL10/MAPK1/MDM2/EGFR/IKBKB/CREB1/IL4/MAPK8/TER…	171	BP
GO:0032944	regulation of mononuclear cell proliferation	42/415	200/17910	3.0137744720037e-28	6.91368860219356e-27	2.63356066194573e-27	MPL/IGF1/LEP/FOXP3/BCL2/IL5/SHH/SFTPD/AGER/CTNNB1/TGFB1/IL13/PTPRC/IL10/LGALS3/IL4/CCL5/CDKN1A/IL1B/HAVCR2/EPO/HMGB1/IL12RB1/IRF1/CSF1/ARG1/TFRC/ADA/IL6/CASP3/IGF2/IL2/TNFRSF1B/CD81/TLR4/VCAM1/TGFBR2/TLR9/MIF/CEBPB/CD274/CD40LG	42	BP
GO:0099503	secretory vesicle	83/415	923/18675	1.84929134753844e-28	7.31625889369894e-27	4.14873914151715e-27	ABCA3/EDN1/IGF1/ELANE/COL1A1/C3/HSPD1/TF/ALAD/HPS4/HSPA8/GSTP1/FN1/GAA/HP/EGF/B2M/VEGFA/TGFB1/VCP/SLC11A1/CR1/PTPRC/CD14/ANXA2/INS/BRCA2/CXCR1/MMP8/MAPK1/PLAT/SOD1/APOH/LGALS3/PDGFA/HBB/PLG/CAT/IDH1/NFKB1/ALB/TLR2/HGF/HMGB1/TGFB2/PLAU/DSP/ALOX5/SLC40A1/CD36/CXCR2/RHOA/SERPINA1/MAPK14/GSN/MPO/PDGFB/CALR/ARG1/SLPI/CAMP/PTX3/S100A8/HSP90AA1/PECAM1/TTR/TGFB3/IGF2/PYGL/RNASE3/CAV1/TNFRSF1B/LTF/CXCL1/S…	83	CC
GO:0008285	negative regulation of cell proliferation	76/415	751/17910	3.45592532100612e-28	7.90440062259882e-27	3.01094245542544e-27	XDH/SOD2/FOXP3/APOE/BCL2/RARB/GSTP1/PPARGC1A/TNF/IL1A/SHH/JAK2/SFTPD/WNT5A/PTGS2/BMP7/CTNNB1/TGFB1/MYC/TNFAIP3/STAT1/IGFBP5/EIF2AK2/HMOX1/SMAD2/BRCA2/IL10/APOH/TERT/PLG/TP53/UMOD/CDKN1A/IL1B/IGFBP3/TLR2/HAVCR2/NME1/AGTR2/TGFB2/PTEN/IRF1/PKD2/SMAD3/TSC2/PPARG/CXCL8/RAF1/STAT3/ARG1/NOX4/SMAD4/CCL2/IL6/CASP3/VDR/LYN/TGFB3/RBP4/IL2/IFNG/CAV1/CXCL1/HNF4A/SH2B3/NOS3/TGFBR2/SPARC/LTA/CDKN2A/CEBPB/JUN/NO…	76	BP
GO:0050707	regulation of cytokine secretion	42/415	201/17910	3.73165917283389e-28	8.50973315822802e-27	3.24152558477309e-27	FOXP3/IRF3/EZR/CRP/FN1/TNF/IL1A/WNT5A/AGER/TNFAIP3/MMP12/CCR7/CD14/INS/MMP8/IL10/SRC/LPL/IL1B/NOD2/TLR2/HAVCR2/AGTR2/TWIST1/HMGB1/NLRP3/IFNA2/IL17A/MAPK14/ATG5/CHUK/CD34/LYN/TNFRSF1B/MAPK3/NR1H4/TLR4/TLR9/MIF/APOA1/CCL3/CD274	42	BP
GO:0022409	positive regulation of cell-cell adhesion	46/415	251/17910	3.94005780764477e-28	8.95838587329883e-27	3.41242627314235e-27	IGF1/LEP/ELANE/FOXP3/HSPD1/TNF/SHH/WNT5A/BMP7/AGER/TGFB1/CCR7/PTPRC/IL10/IL4/SRC/CCL5/IL1B/NOD2/HAVCR2/EPO/HMGB1/IL12RB1/NLRP3/PTPN11/RHOA/SMAD7/TFRC/CCL2/ADA/IL6/LYN/IGF2/CD80/PIK3CA/IL2/IFNG/ICAM1/CAV1/CD81/RELA/VCAM1/TGFBR2/AKT1/CD274/CD40LG	46	BP
GO:0018212	peptidyl-tyrosine modification	53/415	349/17910	3.96173321793484e-28	8.98109728018561e-27	3.42107749699636e-27	IGF1/SEMA4D/FGFR1/MET/LEP/PTK2/IL5/AGT/PDGFRB/TNF/EGF/JAK2/TNFRSF1A/VEGFA/TGFB1/IL13/PTPRC/EIF2AK2/EGFR/PDGFA/IL4/SRC/CCL5/TP53/EPO/HGF/IFNA2/CD36/MTOR/PDGFB/CSF3/STAT3/NOX4/VTN/IL6/ACE/PECAM1/LYN/IGF2/CD80/FGF7/IL2/IFNG/ICAM1/CAV1/MAPK3/CD81/SH2B3/INSR/JAK1/MIF/CSF2/ADIPOQ	53	BP
GO:0071902	positive regulation of protein serine/threonine kinase activity	51/415	322/17910	5.65514119522224e-28	1.27822823780244e-26	4.86902404455513e-27	EDN1/CXCR4/IGF1/FGFR1/ELANE/PDGFRB/TNF/EGF/JAK2/WNT5A/AGER/CCND1/VEGFA/TGFB1/PTPRC/EIF2AK2/MAPK1/EGFR/SOD1/PDGFA/SRC/SIRT1/IL1B/NOD2/HGF/PKD1/PKD2/PTPN11/EZH2/KRAS/RHOA/MAPK14/RAF1/PDGFB/NOX4/ADRB2/TGFB3/IGF2/PIK3CG/IFNG/FGF2/MAPK3/LTF/CD81/TLR4/INSR/TLR9/AKT1/MIF/CD40LG/ADIPOQ	51	BP
GO:0032774	RNA biosynthetic process	178/415	3516/17910	6.04077263970189e-28	1.36138820340496e-26	5.185796793027e-27	EDN1/IGF1/EP300/SOD2/SEMA4D/FGFR1/MET/LEP/BRCA1/ELANE/COL1A1/FOXP3/BIRC5/APOE/AIRE/HSPD1/TFR2/IRF3/EZR/IL5/AGT/PKHD1/HSPA8/RARB/TCF4/NFE2L2/NR1I3/BMP6/PPARGC1A/SNAI1/TNF/EGF/IL1A/CREBBP/SHH/JAK2/TNFRSF1A/SPP1/XIAP/WNT5A/BMP7/AGER/CTNNB1/CCND1/NOTCH2/ESR1/TYMS/PSMB8/VEGFA/TGFB1/MYC/NKX2-1/SLC11A1/TNFAIP3/FOXO1/STAT1/GCLC/MMP12/EIF2AK2/HMOX1/INS/SMAD2/BRCA2/IL10/MAPK1/MDM2/EGFR/IKBKB/CREB1/IL4/MAPK…	178	BP
GO:0007167	enzyme linked receptor protein signaling pathway	86/415	968/17910	6.96667810215415e-28	1.56546553260394e-26	5.96316768300729e-27	MMP2/XDH/HSPB1/IGF1/EP300/FGFR1/MET/LEP/PTK2/AGT/BMP6/PDGFRB/EGF/CREBBP/SHH/JAK2/XIAP/WNT5A/BMP7/CTNNB1/VEGFA/TGFB1/NKX2-1/FOXO1/IGFBP5/INS/SMAD2/MAPK1/EGFR/CREB1/PDGFA/SRC/TP53/SIRT1/IL1B/IGFBP3/SREBF1/AGTR2/COL1A2/HGF/TGFB2/PTEN/PTPN11/SMAD3/CSF1/TSC2/RHOA/AFP/MAPK14/RAF1/SMAD7/PDGFB/VIM/STAT3/VTN/ADRB2/SMAD4/HSP90AA1/CASP3/COL3A1/ENG/LYN/TGFB3/IGF2/FGF7/PIK3CA/FOS/HSPA5/FGF2/CAV1/MAPK3/HNF4A/S…	86	BP
GO:0043491	protein kinase B signaling	47/415	268/17910	7.65484947290491e-28	1.71508799414794e-26	6.53310921717003e-27	XDH/IGF1/FGFR1/MET/LEP/PTK2/PKHD1/PDGFRB/TNF/EGF/ITGB1/THPO/ESR1/TGFB1/IGFBP5/CCR7/INS/EGFR/PDGFA/SRC/CCL5/SIRT1/IL1B/HGF/PTEN/PTPN11/TSC2/MTOR/PDGFB/CSF3/NOX4/CCL2/HSP90AA1/ENG/IGF2/CD80/PIK3CG/FGF7/PIK3CA/DDIT3/FGF2/SH2B3/INSR/AKT1/TXN/F3/CCL3	47	BP
GO:0050678	regulation of epithelial cell proliferation	54/415	369/17910	7.87167486009386e-28	1.75854131685527e-26	6.69863151343973e-27	XDH/IGF1/FGFR1/LEP/APOE/BMP6/TNF/SHH/WNT5A/CTNNB1/CCND1/NOTCH2/VEGFA/TGFB1/MYC/TNFAIP3/STAT1/MMP12/CCL11/HMOX1/BRCA2/IL10/EGFR/APOH/CCL5/SIRT1/NOD2/NME1/TWIST1/HMGB1/TGFB2/PTEN/SMAD3/PPARG/MTOR/PDGFB/STAT3/ARG1/AGTR1/CCL2/VDR/FGF7/SP1/FGF2/CXCL12/GLUL/CAV1/HIF1A/AKT1/SPARC/F3/JUN/BAX/PRKCA	54	BP
GO:2000112	regulation of cellular macromolecule biosynthetic process	184/415	3725/17910	8.70762031823506e-28	1.93965397523584e-26	7.38852543249785e-27	EDN1/HSPB1/IGF1/EP300/SOD2/SEMA4D/FGFR1/MET/LEP/BRCA1/ELANE/COL1A1/FOXP3/BIRC5/APOE/AIRE/HSPD1/BCL2/GCK/TFR2/IRF3/EZR/IL5/AGT/PKHD1/HSPA8/TCF4/NFE2L2/NR1I3/BMP6/PPARGC1A/SNAI1/PDGFRB/TNF/EGF/IL1A/CREBBP/SHH/JAK2/TNFRSF1A/SPP1/XIAP/WNT5A/BMP7/AGER/CTNNB1/CCND1/NOTCH2/ESR1/TYMS/PSMB8/VEGFA/TGFB1/MYC/NKX2-1/SLC11A1/TNFAIP3/FOXO1/STAT1/GCLC/IGFBP5/MMP12/CCR7/EIF2AK2/HMOX1/INS/SMAD2/BRCA2/IL10/MAPK1/M…	184	BP
GO:1903506	regulation of nucleic acid-templated transcription	172/415	3338/17910	1.11585709264083e-27	2.47842825345225e-26	9.44082316590858e-27	EDN1/IGF1/EP300/SOD2/SEMA4D/FGFR1/MET/LEP/BRCA1/ELANE/COL1A1/FOXP3/BIRC5/APOE/AIRE/HSPD1/TFR2/IRF3/EZR/IL5/AGT/PKHD1/HSPA8/TCF4/NFE2L2/NR1I3/BMP6/PPARGC1A/SNAI1/TNF/EGF/IL1A/CREBBP/SHH/JAK2/TNFRSF1A/SPP1/XIAP/WNT5A/BMP7/AGER/CTNNB1/CCND1/NOTCH2/ESR1/TYMS/PSMB8/VEGFA/TGFB1/MYC/NKX2-1/SLC11A1/TNFAIP3/FOXO1/STAT1/GCLC/MMP12/EIF2AK2/HMOX1/INS/SMAD2/BRCA2/IL10/MAPK1/MDM2/EGFR/IKBKB/CREB1/IL4/MAPK8/TER…	172	BP
GO:0034612	response to tumor necrosis factor	48/415	284/17910	1.13985488700115e-27	2.52443366184548e-26	9.61606686106533e-27	EDN1/BRCA1/COL1A1/GPD1/ASS1/GSTP1/NFE2L2/PPARGC1A/TNF/ABCC2/KRT8/JAK2/TNFRSF1A/PTGS2/PSMB8/TNFAIP3/STAT1/CD14/MAPK1/IKBKB/CCL5/CLDN1/NFKB1/SIRT1/NFKBIA/HAMP/TNFRSF11B/CASP8/CXCL8/SELE/MAPK14/CHUK/CCL2/CASP3/RBCK1/ICAM1/TNFRSF1B/MAPK3/RELA/NR1H4/VCAM1/AKT1/LCN2/APOA1/LTA/CCL3/CD40LG/ADIPOQ	48	BP
GO:0045184	establishment of protein localization	120/415	1803/17910	1.18449862537584e-27	2.61576779770498e-26	9.96397663995831e-27	HSPB1/IGF1/NOS2/LEP/COL1A1/FOXP3/APOE/BCL2/TF/GCK/TFR2/IRF3/EZR/IL5/AGT/HPS4/CRP/HSPA8/FN1/BMP6/TNF/IL1A/SHH/JAK2/WNT5A/PTGS2/AGER/TGFB1/VCP/IL13/TNFAIP3/MMP12/CCR7/CD14/HMGCR/INS/SMAD2/BRCA2/MMP8/IL10/MAPK1/MDM2/EGFR/BBS4/MAPK8/TERT/SRC/CCL5/TP53/CDKN1A/LPL/CAT/IDH1/IL1B/AGXT/NFKBIA/CPT1A/SREBF1/NOD2/TLR2/HAVCR2/AGTR2/TWIST1/HMGB1/TGFB2/NLRP3/PKD1/PTPN11/SMAD3/IFNA2/CD36/CASP8/TSC2/PPARG/HSPA4/M…	120	BP
GO:0050730	regulation of peptidyl-tyrosine phosphorylation	45/415	245/17910	1.4077132290376e-27	3.09979259746531e-26	1.18077227867699e-26	IGF1/SEMA4D/LEP/IL5/AGT/TNF/EGF/JAK2/TNFRSF1A/VEGFA/TGFB1/IL13/PTPRC/EGFR/PDGFA/IL4/SRC/CCL5/TP53/EPO/HGF/IFNA2/CD36/MTOR/PDGFB/CSF3/STAT3/NOX4/VTN/IL6/ACE/PECAM1/LYN/IGF2/CD80/FGF7/IL2/IFNG/ICAM1/CAV1/CD81/SH2B3/MIF/CSF2/ADIPOQ	45	BP
GO:0032102	negative regulation of response to external stimulus	52/415	343/17910	1.43195019798891e-27	3.14415350615565e-26	1.19767022574651e-26	EDN1/IGF1/LEP/ELANE/FOXP3/APOE/GSTP1/LDLR/TNFRSF1A/SPP1/F2/WNT5A/AGER/TNFAIP3/PTPRC/HMGCR/INS/IL10/PLAT/SOD1/APOH/PDGFA/IL4/BBS4/PLG/CDKN1A/NFKB1/HAVCR2/HGF/PLAU/PTEN/NLRP3/SMAD3/PPARG/THBD/PDGFB/VTN/CCL2/ADA/CD34/PPARA/IL2/FGF2/TNFRSF1B/LTF/SH2B3/NOS3/SERPINE1/MIF/APOA1/NOTCH1/ADIPOQ	52	BP
GO:0045055	regulated exocytosis	76/415	768/17910	1.48428028254385e-27	3.24977036220783e-26	1.2379017741054e-26	IGF1/ELANE/C3/TF/ALAD/HSPA8/GSTP1/FN1/GAA/HP/EGF/B2M/VEGFA/TGFB1/VCP/IL13/SLC11A1/CR1/PTPRC/CD14/ANXA2/HMOX1/CXCR1/MMP8/MAPK1/SOD1/APOH/LGALS3/PDGFA/HBB/PLG/CAT/IDH1/NFKB1/ALB/TLR2/HGF/HMGB1/TGFB2/PLAU/DSP/ALOX5/CD36/CXCR2/RHOA/SERPINA1/MAPK14/GSN/MPO/PDGFB/ARG1/SLPI/CAMP/PTX3/S100A8/ANXA5/HSP90AA1/PECAM1/TTR/LYN/TGFB3/IGF2/PYGL/RNASE3/PIK3CG/TNFRSF1B/LTF/CXCL1/SERPINE1/MIF/LCN2/SPARC/APOA1/CCL3/…	76	BP
GO:0051235	maintenance of location	48/415	286/17910	1.58081700402377e-27	3.45130076020531e-26	1.31466868665972e-26	LEP/APOE/C3/EZR/CRP/GAA/ATP7B/TNF/F2/TGFB1/IL13/CCR7/PTPRC/IL10/BBS4/CXCL10/LPL/NFKB1/SIRT1/IL1B/NFKBIA/ALB/PKD1/NOS1/PKD2/CD36/PPARG/GSN/CALR/ATG5/NR1H2/SCARB1/S100A8/IL6/PPARA/LYN/DDIT3/HSPA5/FGF2/CAV1/HSP90B1/AKT1/LCN2/TXN/APOA1/CCL3/BAX/S100A9	48	BP
GO:0044433	cytoplasmic vesicle part	104/415	1450/18675	1.10065109407139e-27	4.09830672086581e-26	2.3239753750981e-26	ABCA3/IGF1/ELANE/APOE/C3/TF/ALAD/HSPA8/GSTP1/FN1/GAA/HP/EGF/LDLR/JAK2/WNT5A/B2M/SCNN1B/VEGFA/TGFB1/MRC1/PCSK9/VCP/SLC11A1/CR1/PTPRC/CD14/ANXA2/INS/CXCR1/MMP8/MAPK1/MDM2/EGFR/APOH/TLR7/LGALS3/PDGFA/HBB/PLG/CAT/IDH1/NFKB1/ALB/SREBF1/HLA-C/TLR2/HGF/HMGB1/TGFB2/PLAU/DSP/ALOX5/PKD1/PKD2/CD36/CXCR2/RHOA/SERPINA1/STEAP4/MAPK14/GSN/MPO/PDGFB/CALR/ATG5/HLA-A/ARG1/SLPI/CAMP/PTX3/ADRB2/SCARB1/TFRC/S100A8/AD…	104	CC
GO:0050670	regulation of lymphocyte proliferation	41/415	199/17910	3.00389663198753e-27	6.5396446506584e-26	2.4910799265118e-26	MPL/IGF1/LEP/FOXP3/BCL2/IL5/SHH/SFTPD/AGER/CTNNB1/TGFB1/IL13/PTPRC/IL10/LGALS3/IL4/CCL5/CDKN1A/IL1B/HAVCR2/EPO/HMGB1/IL12RB1/IRF1/ARG1/TFRC/ADA/IL6/CASP3/IGF2/IL2/TNFRSF1B/CD81/TLR4/VCAM1/TGFBR2/TLR9/MIF/CEBPB/CD274/CD40LG	41	BP
GO:0030099	myeloid cell differentiation	56/415	411/17910	3.16547913320807e-27	6.87195116912542e-26	2.61766204860292e-26	MPL/EP300/GNAS/IL5/TNF/CREBBP/THPO/JAK2/B2M/CTNNB1/NOTCH2/VEGFA/TGFB1/MYC/STAT1/CCR7/ANXA2/BGLAP/CREB1/LGALS3/IL4/SIRT1/ALAS2/NFKBIA/TLR2/NME1/EPO/FASN/PTPN11/CSF1/CASP8/PPARG/IL17A/MTOR/MAPK14/CSF3/STAT3/TFRC/CASP3/SLC11A2/LYN/FOS/IFNG/LTF/CD81/SH2B3/HIF1A/TLR4/TGFBR2/CEBPB/CCL3/JUN/PRKCA/CSF2/MMP9/ADIPOQ	56	BP
GO:0006887	exocytosis	80/415	862/17910	3.7929883547153e-27	8.21101845239073e-26	3.12773924817294e-26	IGF1/ELANE/C3/TF/ALAD/HSPA8/GSTP1/FN1/GAA/HP/EGF/B2M/VEGFA/TGFB1/VCP/IL13/SLC11A1/CR1/PTPRC/CD14/ANXA2/HMOX1/EXOC4/CXCR1/MMP8/MAPK1/SOD1/APOH/LGALS3/PDGFA/HBB/PLG/CCL5/CAT/IDH1/NFKB1/ALB/TLR2/HGF/HMGB1/TGFB2/PLAU/DSP/ALOX5/CD36/CXCR2/RHOA/SERPINA1/MAPK14/GSN/MPO/PDGFB/ARG1/SLPI/CAMP/PTX3/S100A8/ANXA5/HSP90AA1/PECAM1/TTR/LYN/TGFB3/IGF2/PYGL/RNASE3/PIK3CG/IFNG/TNFRSF1B/LTF/CXCL1/CFTR/SERPINE1/MIF/L…	80	BP
GO:0031960	response to corticosteroid	37/415	155/17910	4.00966443985706e-27	8.65569416300603e-26	3.29712501692563e-26	ABCA3/EDN1/UGT1A1/COL1A1/BCL2/ASS1/ALAD/GSTP1/BMP6/TNF/ABCC2/PTGS2/CCND1/TYMS/TGFB1/FOXO1/BGLAP/IL10/EGFR/SRC/CDKN1A/CLDN1/AGXT/AGTR2/EPO/KRAS/RHOA/NR3C1/PCNA/ARG1/IL6/CASP3/ENG/FOS/ICAM1/SPARC/ADIPOQ	37	BP
GO:2001233	regulation of apoptotic signaling pathway	55/415	397/17910	4.0868548297542e-27	8.79761326797228e-26	3.3511848095375e-26	HSPB1/IGF1/SOD2/FGFR1/BRCA1/BCL2/AGT/GSTP1/NFE2L2/SNAI1/TNF/IL1A/JAK2/PTGS2/CTNNB1/TNFAIP3/GCLC/PTPRC/HMOX1/INS/MDM2/SOD1/LGALS3/MAPK8/TERT/SRC/TP53/SIRT1/IL1B/AGTR2/EPO/HGF/PTEN/SMAD3/FAS/CASP8/RAF1/GSN/S100A8/RBCK1/DDIT3/CXCL12/ICAM1/CAV1/RELA/HIF1A/NOS3/SERPINE1/AKT1/MIF/IFNB1/BAX/S100A9/CSF2/MMP9	55	BP
GO:0097191	extrinsic apoptotic signaling pathway	42/415	213/17910	4.39373546010697e-27	9.43180363433577e-26	3.59276045708835e-26	IGF1/FGFR1/BRCA1/BCL2/AGT/GSTP1/TNF/IL1A/KRT8/JAK2/TNFRSF1A/TGFB1/TNFAIP3/GCLC/PTPRC/HMOX1/LGALS3/TERT/SRC/IL1B/AGTR2/HGF/TGFB2/PTEN/SMAD3/FAS/CASP8/RAF1/CASP3/RBCK1/IL2/IFNG/ICAM1/CAV1/TNFRSF1B/RELA/NOS3/SERPINE1/AKT1/LCN2/BAX/CSF2	42	BP
GO:1903039	positive regulation of leukocyte cell-cell adhesion	42/415	214/17910	5.35434812149603e-27	1.1461884488495e-25	4.36605838612534e-26	IGF1/LEP/ELANE/FOXP3/HSPD1/TNF/SHH/AGER/TGFB1/CCR7/PTPRC/IL4/SRC/CCL5/IL1B/NOD2/HAVCR2/EPO/HMGB1/IL12RB1/NLRP3/PTPN11/RHOA/TFRC/CCL2/ADA/IL6/LYN/IGF2/CD80/PIK3CA/IL2/IFNG/ICAM1/CAV1/CD81/RELA/VCAM1/TGFBR2/AKT1/CD274/CD40LG	42	BP
GO:0002440	production of molecular mediator of immune response	40/415	191/17910	6.79456259824231e-27	1.45045037687478e-25	5.5250522180444e-26	ELANE/FOXP3/HSPD1/IL5/TNF/WNT5A/B2M/TGFB1/IL13/SLC11A1/PTPRC/HMOX1/IL10/IL4/SIRT1/IL1B/NOD2/TLR2/TGFB2/NLRP3/IFNA2/CD36/MAPK14/SMAD7/ATG5/ARG1/TFRC/IL6/TGFB3/RBP4/IL2/TNFRSF1B/MAPK3/CD81/TLR4/TLR9/MIF/APOA1/IFNB1/CD40LG	40	BP
GO:0009410	response to xenobiotic stimulus	46/415	270/17910	1.0617966012963e-26	2.26036201688701e-25	8.61016576237066e-26	EDN1/CXCR4/UGT1A1/CYP2D6/CYP2C19/ASS1/CYP1A1/GSTP1/PPARGC1A/CYP3A5/ABCC2/CYP2C9/TGFB1/FOXO1/GCLC/GGT1/GSTM1/MDM2/EGFR/SOD1/NAT2/CLDN1/AGTR2/EPO/PPARG/NR3C1/MTOR/PDGFB/PCNA/ARG1/CYP2E1/UGT1A6/AIP/ADA/UGT1A9/CYP1A2/HSPA5/EPHX1/ICAM1/ABCB4/HNF4A/RELA/GSTM3/CYP2B6/NR1I2/CYP3A4	46	BP
GO:0002700	regulation of production of molecular mediator of immune response	35/415	138/17910	1.09911530713815e-26	2.33334285507091e-25	8.8881642022425e-26	FOXP3/IL5/TNF/WNT5A/B2M/TGFB1/IL13/PTPRC/HMOX1/IL10/IL4/IL1B/NOD2/TGFB2/NLRP3/IFNA2/CD36/MAPK14/SMAD7/ATG5/ARG1/TFRC/IL6/TGFB3/RBP4/IL2/TNFRSF1B/MAPK3/CD81/TLR4/TLR9/MIF/APOA1/IFNB1/CD40LG	35	BP
GO:0051091	positive regulation of DNA-binding transcription factor activity	45/415	257/17910	1.17087863105452e-26	2.47884360321046e-25	9.4424053152461e-26	EDN1/EP300/IL5/AGT/PPARGC1A/TNF/SHH/JAK2/WNT5A/AGER/CTNNB1/ESR1/VEGFA/TGFB1/EIF2AK2/INS/IL10/IKBKB/CAT/NFKB1/IL1B/NOD2/TLR2/PTEN/NLRP3/SMAD3/CD36/KRAS/PPARG/CSF3/CHUK/STAT3/S100A8/IL6/RBCK1/DDIT3/ICAM1/CAV1/LTF/RELA/TLR4/TLR9/AKT1/CD40LG/S100A9	45	BP
GO:0031329	regulation of cellular catabolic process	77/415	814/17910	1.20704364685476e-26	2.54838747969199e-25	9.70731168855722e-26	HSPB1/IGF1/EP300/MET/LEP/APOE/PTK2/BCL2/GPD1/GCK/ALAD/EZR/HSPA8/NFE2L2/HP/PPARGC1A/TNF/EGF/LDLR/SHH/PSMB8/PCSK9/VCP/SLC11A1/TNFAIP3/FOXO1/GCLC/ANXA2/HMOX1/INS/EXOC4/IL10/MDM2/IL4/MAPK8/TP53/IDH1/SIRT1/IL1B/CPT1A/SREBF1/TWIST1/HGF/HMGB1/PTEN/AXIN1/PKD1/APOC3/TSC2/MTOR/MAPK14/SMAD7/VIM/STAT3/ADRB2/DKC1/SCARB1/IL6/HSP90AA1/CASP3/PRKAA2/PPARA/FABP1/PIK3CG/PIK3CA/DDIT3/IFNG/CAV1/TNFRSF1B/MAPK3/CD81/HI…	77	BP
GO:0008104	protein localization	140/415	2417/17910	1.40221722071042e-26	2.95233954552318e-25	1.12460449626408e-25	HSPB1/IGF1/NOS2/LEP/COL1A1/FOXP3/APOE/BCL2/TF/GCK/TFR2/IRF3/EZR/IL5/AGT/HPS4/CRP/HSPA8/FN1/BMP6/TNF/EGF/IL1A/ITGB1/SHH/JAK2/TNFRSF1A/F2/WNT5A/PTGS2/BMP7/AGER/CTNNB1/ESR1/TGFB1/VCP/IL13/TNFAIP3/MMP12/CCR7/CD14/HMGCR/INS/SMAD2/BRCA2/MMP8/IL10/MAPK1/MMP14/MDM2/EGFR/IKBKB/LGALS3/BBS4/MAPK8/TERT/SRC/CCL5/TP53/CDKN1A/LPL/CAT/IDH1/IL1B/AGXT/NFKBIA/CPT1A/SREBF1/NOD2/TLR2/HAVCR2/AGTR2/TWIST1/HMGB1/TGFB2/D…	140	BP
GO:0002367	cytokine production involved in immune response	31/415	101/17910	1.46816070402782e-26	3.08273634165405e-25	1.1742752136616e-25	FOXP3/HSPD1/TNF/WNT5A/B2M/TGFB1/SLC11A1/HMOX1/IL10/IL4/SIRT1/IL1B/NOD2/TLR2/TGFB2/NLRP3/IFNA2/CD36/MAPK14/SMAD7/ATG5/ARG1/IL6/TGFB3/TNFRSF1B/MAPK3/CD81/TLR4/MIF/APOA1/IFNB1	31	BP
GO:0097305	response to alcohol	43/415	232/17910	1.48639844733272e-26	3.11252644897874e-25	1.18562285444781e-25	UGT1A1/LEP/BRCA1/ALAD/ACTC1/GSTP1/CTNNB1/CCND1/TYMS/TGFB1/IL13/CCR7/CD14/HMGCR/SMAD2/BGLAP/SOD1/CDKN1A/CAT/CLDN1/HAMP/PTEN/CASP8/PPARG/RHOA/GSN/CSF3/STAT3/CYP2E1/S100A8/PRKAA2/RBP4/IL2/CDH1/FOS/ICAM1/CFTR/VCAM1/TGFBR2/AKT1/SPARC/CCL3/ADIPOQ	43	BP
GO:0006351	transcription, DNA-templated	173/415	3444/17910	1.52084638001024e-26	3.17600663868987e-25	1.20980371361799e-25	EDN1/IGF1/EP300/SOD2/SEMA4D/FGFR1/MET/LEP/BRCA1/ELANE/COL1A1/FOXP3/BIRC5/APOE/AIRE/HSPD1/TFR2/IRF3/EZR/IL5/AGT/PKHD1/HSPA8/RARB/TCF4/NFE2L2/NR1I3/BMP6/PPARGC1A/SNAI1/TNF/EGF/IL1A/CREBBP/SHH/JAK2/TNFRSF1A/SPP1/XIAP/WNT5A/BMP7/AGER/CTNNB1/CCND1/NOTCH2/ESR1/TYMS/PSMB8/VEGFA/TGFB1/MYC/NKX2-1/SLC11A1/TNFAIP3/FOXO1/STAT1/GCLC/MMP12/EIF2AK2/HMOX1/INS/SMAD2/BRCA2/IL10/MAPK1/MDM2/EGFR/IKBKB/CREB1/IL4/MAPK…	173	BP
GO:1901653	cellular response to peptide	52/415	364/17910	2.62409983867766e-26	5.46509681849263e-25	2.08176341502284e-25	EDN1/IGF1/LEP/PTK2/GCK/ASS1/AGT/GSTP1/NFE2L2/JAK2/AGER/TGFB1/PCSK9/FOXO1/STAT1/GCLC/INS/BGLAP/MDM2/CREB1/SRC/TP53/LPL/NFKB1/SIRT1/IL1B/SREBF1/NOD2/AGTR2/PTEN/PTPN11/CD36/TSC2/PPARG/VIM/STAT3/ARG1/AGTR1/ADRB2/LYN/IGF2/SP1/PIK3CA/ICAM1/CAV1/RELA/NR1H4/TLR4/VCAM1/INSR/AKT1/ADIPOQ	52	BP
GO:0097659	nucleic acid-templated transcription	174/415	3500/17910	3.38882008793213e-26	7.03867091236715e-25	2.68116889460576e-25	EDN1/IGF1/EP300/SOD2/SEMA4D/FGFR1/MET/LEP/BRCA1/ELANE/COL1A1/FOXP3/BIRC5/APOE/AIRE/HSPD1/TFR2/IRF3/EZR/IL5/AGT/PKHD1/HSPA8/RARB/TCF4/NFE2L2/NR1I3/BMP6/PPARGC1A/SNAI1/TNF/EGF/IL1A/CREBBP/SHH/JAK2/TNFRSF1A/SPP1/XIAP/WNT5A/BMP7/AGER/CTNNB1/CCND1/NOTCH2/ESR1/TYMS/PSMB8/VEGFA/TGFB1/MYC/NKX2-1/SLC11A1/TNFAIP3/FOXO1/STAT1/GCLC/MMP12/EIF2AK2/HMOX1/INS/SMAD2/BRCA2/IL10/MAPK1/MDM2/EGFR/IKBKB/CREB1/IL4/MAPK…	174	BP
GO:0040008	regulation of growth	69/415	668/17910	4.29177716118799e-26	8.89010983388941e-25	3.38641858001526e-25	EDN1/CXCR4/IGF1/SEMA4D/FGFR1/LEP/ELANE/APOE/PTK2/BCL2/EZR/AGT/FN1/TNF/SPP1/F2/WNT5A/NOTCH2/VEGFA/TGFB1/IGFBP5/INS/IL10/MAPK1/MMP14/EGFR/SOD1/CREB1/BBS4/TP53/CDKN1A/SIRT1/IGFBP3/HAMP/AGTR2/TGFB2/PTEN/SMAD3/CSF1/CD36/LBP/PPARG/RHOA/MTOR/MAPK14/MPO/STAT3/AGTR1/CAMP/ADRB2/SMAD4/S100A8/PPARA/RBP4/IGF2/PIK3CA/IL2/IFNG/FGF2/CXCL12/HNF4A/HIF1A/INSR/TGFBR2/AKT1/LTA/CDKN2A/NOTCH1/S100A9	69	BP
GO:0060326	cell chemotaxis	44/415	253/17910	5.89708154844732e-26	1.2182546155865e-24	4.64057266163893e-25	EDN1/HSPB1/CXCR4/FGFR1/MET/GSTP1/PDGFRB/SFTPD/WNT5A/VEGFA/CCR7/CCL11/CXCR1/IL10/LGALS3/CXCL10/CCL5/ABCC1/HGF/HMGB1/TGFB2/CSF1/LBP/CXCR2/CALCA/CXCL8/MAPK14/PDGFB/CALR/AGTR1/S100A8/CCL2/IL6/LYN/PIK3CG/FGF2/CXCL12/MAPK3/SERPINE1/VCAM1/MIF/CCL3/NOTCH1/S100A9	44	BP
GO:0015833	peptide transport	114/415	1722/17910	6.14454267156437e-26	1.26597346999925e-24	4.82234321140694e-25	EDN1/HSPB1/IGF1/NOS2/LEP/COL1A1/FOXP3/APOE/TF/GCK/TFR2/IRF3/EZR/IL5/AGT/HPS4/CRP/HSPA8/FN1/BMP6/TNF/IL1A/SHH/JAK2/WNT5A/PTGS2/AGER/TGFB1/VCP/IL13/TNFAIP3/MMP12/CCR7/CD14/HMGCR/INS/SMAD2/MMP8/IL10/MAPK1/MDM2/EGFR/BBS4/SRC/CCL5/TP53/CDKN1A/LPL/CAT/IDH1/IL1B/AGXT/NFKBIA/CPT1A/SREBF1/NOD2/TLR2/HAVCR2/AGTR2/TWIST1/HMGB1/TGFB2/NLRP3/PKD1/PTPN11/SMAD3/IFNA2/CD36/TSC2/PPARG/HSPA4/MTTP/IL17A/MAPK14/RAF1/C…	114	BP
GO:1902105	regulation of leukocyte differentiation	45/415	267/17910	6.24562260161061e-26	1.28335854795127e-24	4.88856641009826e-25	FOXP3/GNAS/IL5/TNF/SHH/AGER/CTNNB1/NOTCH2/TGFB1/MYC/CR1/PTPRC/BGLAP/MMP14/SOD1/CREB1/IL4/NME1/HMGB1/IL12RB1/IRF1/NLRP3/IFNA2/CSF1/CASP8/RHOA/IL17A/MTOR/SMAD7/ADA/LYN/CD80/IL2/FOS/IFNG/LTF/TLR4/TGFBR2/TLR9/IFNB1/CEBPB/CCL3/JUN/PRKCA/ADIPOQ	45	BP
GO:0080135	regulation of cellular response to stress	71/415	713/17910	6.92744134652811e-26	1.41966364661516e-24	5.40777947640552e-25	XDH/EDN1/HSPB1/EP300/SOD2/MET/LEP/BRCA1/BCL2/EZR/HSPA8/GSTP1/NFE2L2/SNAI1/TNF/CREBBP/SPP1/WNT5A/PTGS2/BMP7/AGER/CTNNB1/VEGFA/MYC/FOXO1/CCR7/HMGCR/EIF2AK2/INS/MMP3/MMP8/IL10/MAPK1/MDM2/EGFR/SOD1/TERT/TP53/SIRT1/IL1B/NOD2/TWIST1/EPO/HGF/HMGB1/TGFB2/PTEN/AXIN1/FAS/CD36/KRAS/MTOR/PCNA/HSP90AA1/CD34/LYN/DDIT3/HSPA5/CXCL12/CAV1/MAPK3/HIF1A/TLR4/ATF6/TLR9/AKT1/MIF/TXN/CDKN2A/BAX/CD40LG	71	BP
GO:0048729	tissue morphogenesis	67/415	635/17910	7.18290208382233e-26	1.46810113069613e-24	5.59228742864219e-25	EDN1/CXCR4/FGFR1/MET/AIRE/BCL2/EDNRA/ACTC1/AGT/SNAI1/TNF/EGF/ITGB1/SHH/WNT5A/BMP7/CTNNB1/ESR1/PSMB8/VEGFA/TGFB1/MYC/NKX2-1/STAT1/IGFBP5/MMP12/CCL11/EXOC4/SMAD2/IL10/MMP14/MDM2/EGFR/PDGFA/BBS4/SRC/CXCL10/AGTR2/TWIST1/HGF/TGFB2/PTEN/DSP/PKD1/TGM2/RXRA/PKD2/MTHFR/SMAD3/CSF1/CXCR2/TSC2/KRAS/RHOA/MTOR/SMAD7/SMAD4/VDR/COL3A1/ENG/FGF7/FGF2/HIF1A/NOS3/TGFBR2/ACTA2/NOTCH1	67	BP
GO:0042886	amide transport	115/415	1752/17910	7.26215757073369e-26	1.48036288941879e-24	5.63899489158464e-25	EDN1/HSPB1/IGF1/NOS2/LEP/COL1A1/FOXP3/APOE/TF/GCK/TFR2/IRF3/EZR/IL5/AGT/HPS4/CRP/HSPA8/FN1/BMP6/TNF/IL1A/SHH/JAK2/WNT5A/PTGS2/AGER/TGFB1/VCP/IL13/TNFAIP3/MMP12/CCR7/CD14/HMGCR/INS/SMAD2/MMP8/IL10/MAPK1/MDM2/EGFR/BBS4/SRC/CCL5/TP53/CDKN1A/LPL/CAT/IDH1/IL1B/AGXT/NFKBIA/CPT1A/SREBF1/NOD2/TLR2/HAVCR2/AGTR2/TWIST1/HMGB1/TGFB2/NLRP3/PKD1/PTPN11/SMAD3/IFNA2/CD36/TSC2/PPARG/HSPA4/MTTP/ABCB1/IL17A/MAPK14/…	115	BP
GO:0051896	regulation of protein kinase B signaling	43/415	241/17910	7.47724624832231e-26	1.52017559307823e-24	5.7906493502045e-25	XDH/FGFR1/MET/LEP/PTK2/PKHD1/PDGFRB/TNF/EGF/ITGB1/THPO/ESR1/TGFB1/IGFBP5/CCR7/INS/EGFR/PDGFA/SRC/SIRT1/HGF/PTEN/PTPN11/TSC2/MTOR/PDGFB/CSF3/NOX4/HSP90AA1/ENG/IGF2/CD80/PIK3CG/FGF7/PIK3CA/DDIT3/FGF2/SH2B3/INSR/AKT1/TXN/F3/CCL3	43	BP
GO:0046209	nitric oxide metabolic process	28/415	81/17910	9.65950867584584e-26	1.95866290696241e-24	7.46093421122824e-25	EDN1/NOS2/ASS1/AGT/TNF/JAK2/PTGS2/MMP8/IL10/HBB/IL1B/TLR2/AGTR2/NOS1/PKD2/SMAD3/CD36/MTOR/PTX3/HSP90AA1/CD34/IFNG/ICAM1/CAV1/NOS3/TLR4/INSR/AKT1	28	BP
GO:0002697	regulation of immune effector process	56/415	441/17910	1.17641592326968e-25	2.37914641324408e-24	9.06263901000828e-25	LEP/FOXP3/C3/HSPD1/IL5/TNF/F2/WNT5A/B2M/AGER/TGFB1/IL13/TNFAIP3/STAT1/MMP12/CR1/PTPRC/HMOX1/INS/IL10/LGALS3/IL4/IL1B/NOD2/HAVCR2/HMGB1/DNASE1/IL12RB1/TGFB2/NLRP3/IFNA2/CD36/LBP/MAPK14/SMAD7/ATG5/ARG1/VTN/TFRC/IL6/LYN/TGFB3/RBP4/CD80/IL2/IFNG/TNFRSF1B/MAPK3/CD81/TLR4/TLR9/MIF/APOA1/LTA/IFNB1/CD40LG	56	BP
GO:0005126	cytokine receptor binding	42/412	210/16967	1.43963506311826e-26	2.60573946424405e-24	1.64926613371267e-24	IL5/TNF/IL1A/JAK2/VEGFA/TGFB1/IL13/STAT1/CCL11/SMAD2/IL10/IL4/CXCL10/CCL5/IL1B/EPO/IL12RB1/TGFB2/SMAD3/CSF1/CASP8/CXCL8/SMAD7/STAT3/CCL2/IL6/CASP3/ENG/TGFB3/IL2/IFNG/CXCL12/SH2B3/TGFBR2/TLR9/JAK1/MIF/LTA/IFNB1/CCL3/CD40LG/CSF2	42	MF
GO:0048608	reproductive structure development	55/415	426/17910	1.44747758360545e-25	2.91964966666874e-24	1.112152275178e-24	LEP/PTK2/BCL2/BMP6/SNAI1/PDGFRB/KRT8/SHH/SPP1/WNT5A/PTGS2/BMP7/CTNNB1/CCND1/ESR1/VEGFA/NKX2-1/BRCA2/IL10/MAPK1/MMP14/EGFR/SOD1/SRC/IDH1/SIRT1/REN/TGFB2/PTEN/PKD1/RXRA/PKD2/PTPN11/CASP8/PPARG/AFP/MAPK14/PDGFB/PTX3/SMAD4/ADA/CASP3/VDR/RBP4/IGF2/HSPA5/ICAM1/MAPK3/HIF1A/NOS3/INSR/AKT1/CEBPB/BAX/CSF2	55	BP
GO:0007596	blood coagulation	49/415	331/17910	1.55540104447059e-25	3.12912487611427e-24	1.19194552347002e-24	EDN1/HSPB1/MPL/COL1A1/GNAS/APOE/HPS4/NFE2L2/SHH/JAK2/F2/MAPK1/PLAT/APOH/PDGFA/SRC/HBB/PLG/COL1A2/PLAU/IRF1/PTPN11/IFNA2/CD36/SERPINA1/THBD/RAF1/PDGFB/VTN/IL6/ANXA5/CD34/COL3A1/LYN/PIK3CG/PIK3CA/CAV1/MAPK3/HNF4A/SH2B3/NOS3/ACTB/TLR4/SERPINE1/SERPINC1/F3/IFNB1/PRKCA/CD40LG	49	BP
GO:0015031	protein transport	112/415	1689/17910	1.67263396369293e-25	3.35618590365018e-24	1.27843755751822e-24	HSPB1/IGF1/NOS2/LEP/COL1A1/FOXP3/APOE/TF/GCK/TFR2/IRF3/EZR/IL5/AGT/HPS4/CRP/HSPA8/FN1/BMP6/TNF/IL1A/SHH/JAK2/WNT5A/PTGS2/AGER/TGFB1/VCP/IL13/TNFAIP3/MMP12/CCR7/CD14/HMGCR/INS/SMAD2/MMP8/IL10/MAPK1/MDM2/EGFR/BBS4/SRC/CCL5/TP53/CDKN1A/LPL/CAT/IDH1/IL1B/AGXT/NFKBIA/CPT1A/SREBF1/NOD2/TLR2/HAVCR2/AGTR2/TWIST1/HMGB1/TGFB2/NLRP3/PKD1/PTPN11/SMAD3/IFNA2/CD36/TSC2/PPARG/HSPA4/MTTP/IL17A/MAPK14/RAF1/CALR/A…	112	BP
GO:0003013	circulatory system process	61/415	532/17910	1.71101294127289e-25	3.42425376397973e-24	1.3043659511184e-24	EDN1/CXCR4/SOD2/LEP/APOE/EDNRA/ACTC1/AGT/CRP/GAA/JAK2/PTGS2/AGER/ACE2/TGFB1/STAT1/GCLC/HMGCR/HMOX1/INS/MDM2/EGFR/SOD1/BBS4/SRC/HBB/CXCL10/REN/SREBF1/AGTR2/EPO/COL1A2/TGFB2/DSP/NOS1/MTHFR/SMAD3/CXCR2/PPARG/RHOA/MTOR/SMAD7/PDGFB/ELN/ATG5/NOX4/AGTR1/ADA/ACE/CD34/PPARA/PIK3CG/PIK3CA/IL2/CXCL12/ICAM1/CAV1/NOS3/AKT1/ACTA2/ADIPOQ	61	BP
GO:0048015	phosphatidylinositol-mediated signaling	36/415	160/17910	1.88092046545377e-25	3.75451266935383e-24	1.43016809690415e-24	EDN1/IGF1/SEMA4D/FGFR1/LEP/PTK2/EZR/AGT/PDGFRB/TNF/JAK2/F2/INS/MAPK1/EGFR/PDGFA/SRC/CCL5/CAT/SIRT1/TWIST1/EPO/HGF/TGFB2/PTEN/TSC2/RHOA/GSN/PDGFB/CSF3/LYN/PIK3CG/PIK3CA/MAPK3/AKT1/MUC5AC	36	BP
GO:0009892	negative regulation of metabolic process	167/415	3321/17910	1.89261086842617e-25	3.76806075747542e-24	1.43532883149528e-24	XDH/EDN1/HSPB1/IGF1/EP300/NOS2/SEMA4D/FGFR1/MET/UGT1A1/LEP/BRCA1/CYP2D6/ELANE/FOXP3/BIRC5/APOE/C3/PTK2/BCL2/GCK/ALAD/EZR/HSPA8/GSTP1/NR1I3/HP/BMP6/PPARGC1A/SNAI1/TNF/CREBBP/LDLR/SHH/SFTPD/F2/XIAP/WNT5A/PTGS2/BMP7/CTNNB1/CCND1/NOTCH2/ESR1/TYMS/PSMB8/VEGFA/TGFB1/MYC/PCSK9/NKX2-1/IL13/SLC11A1/TNFAIP3/FOXO1/STAT1/GCLC/IGFBP5/MMP12/CR1/PTPRC/HMGCR/ANXA2/EIF2AK2/HMOX1/INS/SMAD2/MMP3/BRCA2/MMP8/IL10/PLA…	167	BP
GO:0061458	reproductive system development	55/415	429/17910	2.05724226929449e-25	4.08524724535611e-24	1.55615143503549e-24	LEP/PTK2/BCL2/BMP6/SNAI1/PDGFRB/KRT8/SHH/SPP1/WNT5A/PTGS2/BMP7/CTNNB1/CCND1/ESR1/VEGFA/NKX2-1/BRCA2/IL10/MAPK1/MMP14/EGFR/SOD1/SRC/IDH1/SIRT1/REN/TGFB2/PTEN/PKD1/RXRA/PKD2/PTPN11/CASP8/PPARG/AFP/MAPK14/PDGFB/PTX3/SMAD4/ADA/CASP3/VDR/RBP4/IGF2/HSPA5/ICAM1/MAPK3/HIF1A/NOS3/INSR/AKT1/CEBPB/BAX/CSF2	55	BP
GO:0051384	response to glucocorticoid	34/415	139/17910	2.19481717728415e-25	4.3472087648012e-24	1.65593775638286e-24	ABCA3/EDN1/UGT1A1/BCL2/ASS1/ALAD/GSTP1/BMP6/TNF/ABCC2/PTGS2/CCND1/TYMS/TGFB1/FOXO1/BGLAP/IL10/EGFR/CDKN1A/CLDN1/AGXT/AGTR2/EPO/KRAS/RHOA/NR3C1/PCNA/ARG1/IL6/CASP3/FOS/ICAM1/SPARC/ADIPOQ	34	BP
GO:0010468	regulation of gene expression	210/415	4819/17910	2.83130312797188e-25	5.59346132094187e-24	2.1306599915816e-24	XDH/EDN1/HSPB1/IGF1/EP300/NOS2/SOD2/SEMA4D/FGFR1/MET/LEP/BRCA1/ELANE/COL1A1/FOXP3/BIRC5/APOE/AIRE/C3/HSPD1/BCL2/TFR2/IRF3/ACTC1/EZR/IL5/AGT/PKHD1/CRP/HSPA8/TCF4/FN1/NFE2L2/NR1I3/BMP6/PPARGC1A/SNAI1/TNF/EGF/IL1A/CREBBP/LDLR/SHH/JAK2/TNFRSF1A/SPP1/F2/XIAP/WNT5A/BMP7/AGER/CTNNB1/CCND1/NOTCH2/ESR1/TYMS/PSMB8/VEGFA/TGFB1/MYC/NKX2-1/IL13/SLC11A1/TNFAIP3/FOXO1/STAT1/GCLC/IGFBP5/MMP12/CR1/PTPRC/EIF2AK2/H…	210	BP
GO:1905952	regulation of lipid localization	35/415	151/17910	3.04591036120443e-25	6.00200541688617e-24	2.28628251403766e-24	EDN1/LEP/APOE/C3/AGT/CRP/BMP6/TNF/EGF/SHH/SPP1/PCSK9/ANXA2/CETP/LPL/NFKB1/SIRT1/IL1B/REN/NFKBIA/AGTR2/PTPN11/APOC3/CD36/PPARG/NR1H2/AGTR1/SCARB1/IL6/PPARA/ABCB4/AKT1/MIF/APOA1/ADIPOQ	35	BP
GO:0006809	nitric oxide biosynthetic process	27/415	76/17910	3.09701903664636e-25	6.0825026122937e-24	2.31694548707856e-24	EDN1/NOS2/ASS1/AGT/TNF/JAK2/PTGS2/MMP8/IL10/HBB/IL1B/AGTR2/NOS1/PKD2/SMAD3/CD36/MTOR/PTX3/HSP90AA1/CD34/IFNG/ICAM1/CAV1/NOS3/TLR4/INSR/AKT1	27	BP
GO:0007599	hemostasis	49/415	336/17910	3.10259079247772e-25	6.0825026122937e-24	2.31694548707856e-24	EDN1/HSPB1/MPL/COL1A1/GNAS/APOE/HPS4/NFE2L2/SHH/JAK2/F2/MAPK1/PLAT/APOH/PDGFA/SRC/HBB/PLG/COL1A2/PLAU/IRF1/PTPN11/IFNA2/CD36/SERPINA1/THBD/RAF1/PDGFB/VTN/IL6/ANXA5/CD34/COL3A1/LYN/PIK3CG/PIK3CA/CAV1/MAPK3/HNF4A/SH2B3/NOS3/ACTB/TLR4/SERPINE1/SERPINC1/F3/IFNB1/PRKCA/CD40LG	49	BP
GO:2001057	reactive nitrogen species metabolic process	28/415	84/17910	3.11621434170919e-25	6.09366595827866e-24	2.32119782624702e-24	EDN1/NOS2/ASS1/AGT/TNF/JAK2/PTGS2/MMP8/IL10/HBB/IL1B/TLR2/AGTR2/NOS1/PKD2/SMAD3/CD36/MTOR/PTX3/HSP90AA1/CD34/IFNG/ICAM1/CAV1/NOS3/TLR4/INSR/AKT1	28	BP
GO:0008202	steroid metabolic process	48/415	321/17910	3.17548364917224e-25	6.19380503651997e-24	2.3593427807502e-24	FGFR1/UGT1A1/LEP/CYP2D6/CYP2C19/APOE/CYP1A1/AGT/BMP6/PPARGC1A/SNAI1/CYP3A5/TNF/LDLR/SHH/SPP1/CYP2C9/ESR1/PCSK9/HMGCR/SOD1/IL4/AKR1D1/CETP/CAT/ABCB11/NFKB1/SIRT1/IL1B/SREBF1/FASN/RXRA/AFP/CYP2E1/AGTR1/SCARB1/VDR/PRKAA2/CYP1A2/SP1/IFNG/NR5A2/CFTR/NR1H4/CYP2B6/NR1I2/APOA1/CYP3A4	48	BP
GO:0051098	regulation of binding	51/415	368/17910	3.46489751648001e-25	6.74119934535414e-24	2.5678560941588e-24	IGF1/EP300/MET/CYP2D6/APOE/BCL2/EGF/JAK2/WNT5A/B2M/AGER/CTNNB1/TGFB1/PCSK9/ANXA2/HMOX1/SMAD2/MMP8/IL10/LGALS3/MAPK8/TERT/SRC/NFKBIA/NME1/TWIST1/HMGB1/PKD1/SMAD3/CD36/PPARG/PDGFB/CSF3/SLPI/VTN/ADRB2/SMAD4/ACE/PPARA/DDIT3/IFNG/HSPA5/CAV1/MAPK3/ACTB/AKT1/TXN/JUN/BAX/MMP9/ADIPOQ	51	BP
GO:0050817	coagulation	49/415	337/17910	3.55659214446027e-25	6.90212389650939e-24	2.62915543693355e-24	EDN1/HSPB1/MPL/COL1A1/GNAS/APOE/HPS4/NFE2L2/SHH/JAK2/F2/MAPK1/PLAT/APOH/PDGFA/SRC/HBB/PLG/COL1A2/PLAU/IRF1/PTPN11/IFNA2/CD36/SERPINA1/THBD/RAF1/PDGFB/VTN/IL6/ANXA5/CD34/COL3A1/LYN/PIK3CG/PIK3CA/CAV1/MAPK3/HNF4A/SH2B3/NOS3/ACTB/TLR4/SERPINE1/SERPINC1/F3/IFNB1/PRKCA/CD40LG	49	BP
GO:0043405	regulation of MAP kinase activity	48/415	322/17910	3.65572716654219e-25	7.07664062339464e-24	2.69563230814101e-24	EDN1/CXCR4/IGF1/FGFR1/ELANE/APOE/GSTP1/PDGFRB/TNF/EGF/JAK2/WNT5A/BMP7/AGER/VEGFA/TGFB1/PTPRC/HMGCR/EIF2AK2/MAPK1/EGFR/SOD1/PDGFA/SRC/IL1B/NOD2/HGF/PTPN11/EZH2/KRAS/MAPK14/RAF1/PDGFB/NOX4/LYN/TGFB3/PIK3CG/FGF2/CAV1/MAPK3/CD81/SH2B3/TLR4/INSR/TLR9/MIF/CD40LG/ADIPOQ	48	BP
GO:0048017	inositol lipid-mediated signaling	36/415	163/17910	3.75425206912771e-25	7.24910229930816e-24	2.76132636980803e-24	EDN1/IGF1/SEMA4D/FGFR1/LEP/PTK2/EZR/AGT/PDGFRB/TNF/JAK2/F2/INS/MAPK1/EGFR/PDGFA/SRC/CCL5/CAT/SIRT1/TWIST1/EPO/HGF/TGFB2/PTEN/TSC2/RHOA/GSN/PDGFB/CSF3/LYN/PIK3CG/PIK3CA/MAPK3/AKT1/MUC5AC	36	BP
GO:0044255	cellular lipid metabolic process	83/415	991/17910	3.87535684541426e-25	7.46418981378662e-24	2.84325745603405e-24	EDN1/UGT1A1/LEP/BRCA1/CYP2D6/CYP2C19/APOE/C3/PTK2/GPD1/CYP1A1/AGT/GSTP1/PPARGC1A/CYP3A5/PDGFRB/TNF/LDLR/TNFRSF1A/PTGS2/CYP2C9/TGFB1/PCSK9/NKX2-1/CCR7/ABCD3/GGT1/INS/PNPLA3/ACADM/EGFR/APOH/PDGFA/CETP/HADHB/SRC/LPL/CAT/HADHA/IDH1/SIRT1/IL1B/CPT1A/SREBF1/NOD2/TWIST1/PTEN/ALOX5/FASN/PTPN11/APOC3/CD36/PPARG/MTOR/MAPK14/PDGFB/NR1H2/CYP2E1/AGTR1/SCARB1/CPT2/PRKAA2/PPARA/TTR/UGT1A9/CYP1A2/LYN/RBP4/FABP1/…	83	BP
GO:1901575	organic substance catabolic process	120/415	1925/17910	4.2543532782833e-25	8.17367623590178e-24	3.11351485971206e-24	XDH/HSPB1/IGF1/NOS2/UGT1A1/LEP/CYP2D6/ELANE/APOE/ALDH2/PTK2/GPD1/GCK/ALAD/CYP1A1/EZR/HSPA8/NFE2L2/GAA/PPARGC1A/CYP3A5/TNF/EGF/LDLR/SHH/SPP1/WNT5A/CBS/CTNNB1/PSMB8/TGFB1/PCSK9/VCP/SLC11A1/TNFAIP3/FOXO1/GPT/GCLC/MMP12/HMGCR/ANXA2/ABCD3/GGT1/HMOX1/INS/PNPLA3/ACADM/IL10/MDM2/EGFR/AKR1D1/SCT/HADHB/TP53/LPL/HADHA/IDH1/SIRT1/IL1B/AGXT/CPT1A/TWIST1/TYMP/HMGB1/DNASE1/PTEN/AXIN1/PKD1/NOS1/SMAD3/APOC3/CASP8…	120	BP
GO:0008015	blood circulation	60/415	523/17910	4.3125509558496e-25	8.26482645778158e-24	3.14823578113078e-24	EDN1/CXCR4/SOD2/LEP/APOE/EDNRA/ACTC1/AGT/CRP/GAA/JAK2/PTGS2/AGER/ACE2/TGFB1/STAT1/GCLC/HMGCR/HMOX1/INS/MDM2/EGFR/SOD1/BBS4/SRC/HBB/CXCL10/REN/SREBF1/AGTR2/EPO/COL1A2/TGFB2/DSP/NOS1/MTHFR/SMAD3/CXCR2/PPARG/RHOA/MTOR/SMAD7/PDGFB/ELN/ATG5/AGTR1/ADA/ACE/CD34/PPARA/PIK3CG/PIK3CA/IL2/CXCL12/ICAM1/CAV1/NOS3/AKT1/ACTA2/ADIPOQ	60	BP
GO:0071356	cellular response to tumor necrosis factor	44/415	266/17910	5.02043249798631e-25	9.59751834503105e-24	3.65588446632625e-24	EDN1/BRCA1/COL1A1/GPD1/ASS1/GSTP1/NFE2L2/PPARGC1A/TNF/ABCC2/KRT8/JAK2/TNFRSF1A/PSMB8/TNFAIP3/STAT1/MAPK1/IKBKB/CCL5/CLDN1/NFKB1/SIRT1/NFKBIA/HAMP/TNFRSF11B/CASP8/CXCL8/MAPK14/CHUK/CCL2/RBCK1/ICAM1/TNFRSF1B/MAPK3/RELA/NR1H4/VCAM1/AKT1/LCN2/APOA1/LTA/CCL3/CD40LG/ADIPOQ	44	BP
GO:0034614	cellular response to reactive oxygen species	36/415	165/17910	5.900050242481e-25	1.12510883656244e-23	4.28576197579722e-24	MMP2/SOD2/MET/NFE2L2/TNF/BMP7/TNFAIP3/FOXO1/MMP3/IL10/MAPK1/MDM2/EGFR/SOD1/MAPK8/SRC/SIRT1/HGF/PKD2/EZH2/CD36/MPO/PCNA/CHUK/ARG1/IL6/FABP1/FOS/MAPK3/RELA/NOS3/AKT1/LCN2/TXN/JUN/MMP9	36	BP
GO:0002573	myeloid leukocyte differentiation	39/415	201/17910	6.13927239193856e-25	1.1678294141596e-23	4.4484931010894e-24	GNAS/IL5/TNF/CTNNB1/NOTCH2/VEGFA/TGFB1/MYC/CCR7/ANXA2/BGLAP/CREB1/IL4/SIRT1/TLR2/NME1/FASN/CSF1/CASP8/PPARG/IL17A/MTOR/MAPK14/CSF3/TFRC/LYN/FOS/IFNG/LTF/CD81/TLR4/TGFBR2/CEBPB/CCL3/JUN/PRKCA/CSF2/MMP9/ADIPOQ	39	BP
GO:0051336	regulation of hydrolase activity	90/415	1160/17910	6.22358743967504e-25	1.18094492528155e-23	4.49845267569494e-24	XDH/SEMA4D/FGFR1/BIRC5/C3/HSPD1/PTK2/EDNRA/AGT/FN1/PDGFRB/TNF/ITGB1/JAK2/XIAP/WNT5A/PTGS2/AGER/ESR1/PSMB8/VEGFA/MYC/VCP/CCR7/CR1/PTPRC/EIF2AK2/CCL11/MDM2/EGFR/IKBKB/SOD1/APOH/LGALS3/BBS4/MAPK8/SRC/CCL5/TP53/LPL/SIRT1/IGFBP3/AGTR2/HGF/HMGB1/TGFB2/NLRP3/NOS1/SMAD3/APOC3/EZH2/FAS/CASP8/TSC2/PPARG/RHOA/SELE/MTOR/MAPK14/RAF1/GSN/PCNA/NR1H2/STAT3/SLPI/VTN/AGTR1/PTX3/S100A8/AIP/LYN/FABP1/IFNG/FGF2/ICAM1…	90	BP
GO:0006811	ion transport	105/415	1533/17910	6.67003580109537e-25	1.26254249092162e-23	4.80927393384657e-24	EDN1/CXCR4/NOS2/FGFR1/LEP/APOE/BCL2/TF/GCK/TFR2/AGT/ATP7B/PPARGC1A/PDGFRB/EGF/LDLR/ABCC2/F2/PTGS2/B2M/CTNNB1/SLCO1B1/ACE2/SCNN1B/TGFB1/PCSK9/IL13/SLC11A1/CCR7/SLC22A5/PTPRC/ANXA2/ABCD3/SLC10A1/LGALS3/GPR35/CETP/HBB/CXCL10/CCL5/ABCB11/ABCC1/IL1B/AGXT/CPT1A/SCNN1G/AGTR2/TWIST1/EPO/PTEN/SLCO1B3/PKD1/RXRA/NOS1/PKD2/APOC3/SLC40A1/CD36/PPARG/RHOA/MTTP/ABCB1/MTOR/SLC25A13/RAF1/PDGFB/ATG5/ARG1/ADRB2/SCAR…	105	BP
GO:0097237	cellular response to toxic substance	42/415	241/17910	7.51731442412208e-25	1.41942411177833e-23	5.40686704085957e-24	SOD2/MET/UGT1A1/APOE/GSTP1/NFE2L2/HP/PPARGC1A/TNF/PTGS2/BMP7/TNFAIP3/FOXO1/HMOX1/GSTM1/IL10/MDM2/SOD1/SRC/HBB/CAT/NFKB1/SIRT1/ALB/HGF/PTEN/EZH2/CD36/MPO/PDGFB/PCNA/ARG1/IL6/FABP1/RELA/NOS3/GSTM3/ACTB/LCN2/TXN/GSTT1/S100A9	42	BP
GO:0070665	positive regulation of leukocyte proliferation	33/415	134/17910	8.99987664210636e-25	1.69519735280851e-23	6.45734183222337e-24	MPL/IGF1/LEP/FOXP3/BCL2/IL5/SHH/AGER/IL13/PTPRC/IL4/CCL5/CDKN1A/IL1B/HAVCR2/EPO/HMGB1/IL12RB1/CSF1/TFRC/ADA/IL6/LYN/IGF2/IL2/CD81/TLR4/VCAM1/TGFBR2/TLR9/MIF/CD274/CD40LG	33	BP
GO:0003008	system process	126/415	2118/17910	1.26659736425356e-24	2.37990238246665e-23	9.06551864622094e-24	EDN1/CXCR4/IGF1/EP300/SOD2/FGFR1/LEP/COL1A1/BIRC5/GNAS/APOE/PTK2/BCL2/EDNRA/ACTC1/EZR/AGT/CRP/GAA/BMP6/PPARGC1A/TNF/ITGB1/LDLR/JAK2/TNFRSF1A/PTGS2/AGER/ACE2/SCNN1B/TGFB1/FOXO1/STAT1/GCLC/IGFBP5/SLC22A5/HMGCR/HMOX1/INS/IL10/MAPK1/MDM2/EGFR/SOD1/CREB1/BBS4/SCT/GPR35/SRC/HBB/CXCL10/UMOD/IL1B/REN/HAMP/SREBF1/NOD2/SCNN1G/TLR2/AGTR2/EPO/COL1A2/HGF/TYMP/TGFB2/PTEN/DSP/NOS1/MTHFR/PTPN11/SMAD3/EZH2/CD36/C…	126	BP
GO:0044459	plasma membrane part	129/415	2283/18675	7.31793629794895e-25	2.57347426477871e-23	1.45930776467871e-23	IGF1/SEMA4D/MET/UGT1A1/GNAS/PTK2/TF/EDNRA/TFR2/EZR/PKHD1/HSPA8/FN1/ATP7B/PDGFRB/TNF/ITGB1/LDLR/ABCC2/KRT8/JAK2/TNFRSF1A/F2/PTGS2/B2M/AGER/CTNNB1/NOTCH2/SLCO1B1/ACE2/SCNN1B/MRC1/PCSK9/IL13/SLC11A1/CR1/SLC22A5/PTPRC/CD14/ANXA2/HMOX1/SLC10A1/MAPK1/MMP14/EGFR/IKBKB/LGALS3/BBS4/GPR35/SRC/CXCL10/PLG/UMOD/ABCB11/CLDN1/ABCC1/NOD2/SCNN1G/HLA-C/TLR2/HAVCR2/NME1/AGTR2/HMGB1/IL12RB1/PTEN/AXIN1/DSP/SLCO1B3/PK…	129	CC
GO:0032946	positive regulation of mononuclear cell proliferation	32/415	126/17910	1.65208782748585e-24	3.09665730590945e-23	1.1795779841433e-23	MPL/IGF1/LEP/FOXP3/BCL2/IL5/SHH/AGER/IL13/PTPRC/IL4/CCL5/CDKN1A/IL1B/HAVCR2/EPO/HMGB1/IL12RB1/CSF1/TFRC/ADA/IL6/IGF2/IL2/CD81/TLR4/VCAM1/TGFBR2/TLR9/MIF/CD274/CD40LG	32	BP
GO:0005125	cytokine activity	36/412	154/16967	2.13403305121562e-25	3.3107998480288e-23	2.09552418412601e-23	EDN1/IL5/TNF/IL1A/THPO/SPP1/WNT5A/VEGFA/TGFB1/IL13/CCL11/IL10/IL4/BMP1/CXCL10/CCL5/IL1B/EPO/HMGB1/TGFB2/CSF1/TNFRSF11B/CXCL8/IL17A/CSF3/IL6/IL2/FGF2/CXCL12/MIF/LTA/IFNB1/CCL3/CD40LG/CSF2/ADIPOQ	36	MF
GO:0048771	tissue remodeling	36/415	170/17910	1.77453550427249e-24	3.31807916066523e-23	1.26392194580146e-23	LEP/AGT/IL1A/AGER/CTNNB1/NOTCH2/TGFB1/TNFAIP3/IGFBP5/BGLAP/MMP14/MDM2/EGFR/SRC/PLG/TP53/AGTR2/HMGB1/TGM2/TNFRSF11B/CALCA/ATG5/ARG1/NOX4/ADRB2/TFRC/IL6/VDR/ACE/TGFB3/IL2/CAV1/HIF1A/NOS3/BAX/PRKCA	36	BP
GO:0044283	small molecule biosynthetic process	70/415	732/17910	1.77950806944849e-24	3.31930085284264e-23	1.26438731250288e-23	XDH/EDN1/IGF1/EP300/LEP/BRCA1/CYP2D6/APOE/GPD1/GCK/ASS1/CYP1A1/BMP6/PPARGC1A/SNAI1/TNF/EGF/PTGS2/CBS/CYP2C9/TGFB1/VCP/FOXO1/GPT/HMGCR/ABCD3/GGT1/INS/SOD1/AKR1D1/TP53/LPL/ABCB11/NFKB1/SIRT1/IL1B/AGXT/SREBF1/NME1/TYMP/ALOX5/FASN/APOC3/SLC25A13/MPO/PDGFB/NR1H2/STAT3/CYP2E1/ADA/VDR/PRKAA2/PPARA/CYP1A2/RBP4/SP1/ITPA/IFNG/FGF2/GLUL/HIF1A/CFTR/NR1H4/INSR/MIF/GPT2/ALDOB/CYP3A4/PAH/ADIPOQ	70	BP
GO:0032787	monocarboxylic acid metabolic process	63/415	594/17910	1.87313043195049e-24	3.48547393935582e-23	1.32768592615122e-23	EDN1/IGF1/UGT1A1/LEP/BRCA1/CYP2D6/CYP2C19/C3/GPD1/GCK/CYP1A1/GSTP1/PPARGC1A/ABCC2/TNFRSF1A/PTGS2/CYP2C9/ABCD3/GGT1/INS/PNPLA3/ACADM/AKR1D1/HADHB/TP53/LPL/ABCB11/HADHA/IDH1/SIRT1/IL1B/AGXT/CPT1A/SREBF1/TWIST1/ALOX5/FASN/APOC3/CD36/PPARG/MTOR/MAPK14/NR1H2/STAT3/CYP2E1/UGT1A6/CPT2/PRKAA2/PPARA/UGT1A9/CYP1A2/FABP1/NR5A2/CAV1/MAPK3/HIF1A/NR1H4/INSR/AKT1/MIF/ALDOB/CYP3A4/ADIPOQ	63	BP
GO:0070371	ERK1 and ERK2 cascade	45/415	289/17910	1.9180888586657e-24	3.56051035720916e-23	1.35626878107026e-23	IGF1/APOE/EZR/AGT/PKHD1/GSTP1/FN1/PDGFRB/TNF/EGF/THPO/AGER/NOTCH2/TGFB1/MYC/CCR7/PTPRC/HMGCR/CCL11/MAPK1/EGFR/PDGFA/SRC/IL1B/NOD2/HAVCR2/EPO/HMGB1/PTEN/PTPN11/CD36/PDGFB/NOX4/SMAD4/LYN/FGF2/ICAM1/MAPK3/TLR4/MIF/CCL3/JUN/NOTCH1/PRKCA/ADIPOQ	45	BP
GO:0042136	neurotransmitter biosynthetic process	29/415	98/17910	2.09151186763248e-24	3.87307679584472e-23	1.47533151652148e-23	EDN1/NOS2/ASS1/AGT/TNF/JAK2/PTGS2/MMP8/IL10/HBB/IL1B/AGXT/AGTR2/NOS1/PKD2/SMAD3/CD36/MTOR/PTX3/HSP90AA1/CD34/IFNG/ICAM1/CAV1/NOS3/TLR4/INSR/AKT1/PAH	29	BP
GO:0051248	negative regulation of protein metabolic process	87/415	1116/17910	3.2557289314898e-24	6.01448962463922e-23	2.29103799556507e-23	XDH/EDN1/HSPB1/IGF1/NOS2/SEMA4D/BRCA1/ELANE/FOXP3/BIRC5/APOE/C3/ALAD/EZR/GSTP1/PPARGC1A/TNF/LDLR/SHH/SFTPD/F2/XIAP/PTGS2/BMP7/CTNNB1/TYMS/VEGFA/TGFB1/MYC/TNFAIP3/FOXO1/GCLC/IGFBP5/CR1/PTPRC/HMGCR/ANXA2/EIF2AK2/INS/IL10/PLAT/MDM2/EGFR/IKBKB/LGALS3/SRC/TP53/CDKN1A/NFKB1/SIRT1/IL1B/IGFBP3/TWIST1/HGF/PTEN/SMAD3/TSC2/MTOR/RAF1/SMAD7/CALR/ATG5/STAT3/SLPI/VTN/PTX3/SMAD4/IL6/CASP3/ENG/PRKAA2/LYN/FABP1/IL…	87	BP
GO:0050870	positive regulation of T cell activation	38/415	198/17910	3.83400286836708e-24	7.06578226460456e-23	2.69149614462422e-23	IGF1/LEP/FOXP3/HSPD1/SHH/AGER/TGFB1/CCR7/PTPRC/IL4/SRC/CCL5/IL1B/NOD2/HAVCR2/EPO/HMGB1/IL12RB1/NLRP3/PTPN11/RHOA/TFRC/CCL2/ADA/IL6/LYN/IGF2/CD80/PIK3CA/IL2/IFNG/CAV1/CD81/VCAM1/TGFBR2/AKT1/CD274/CD40LG	38	BP
GO:0009059	macromolecule biosynthetic process	207/415	4806/17910	4.48309464258123e-24	8.24224457613319e-23	3.1396338960006e-23	EDN1/HSPB1/IGF1/EP300/SOD2/SEMA4D/FGFR1/MET/LEP/BRCA1/ELANE/COL1A1/FOXP3/BIRC5/APOE/AIRE/HSPD1/BCL2/GCK/TFR2/IRF3/EZR/IL5/AGT/PKHD1/HSPA8/RARB/GSTP1/TCF4/NFE2L2/NR1I3/BMP6/PPARGC1A/SNAI1/PDGFRB/TNF/EGF/IL1A/CREBBP/NOP10/SHH/JAK2/TNFRSF1A/SPP1/SFTPD/XIAP/WNT5A/BMP7/AGER/CTNNB1/CCND1/NOTCH2/ESR1/ACE2/TYMS/PSMB8/VEGFA/TGFB1/MYC/NKX2-1/VCP/SLC11A1/TNFAIP3/FOXO1/STAT1/GCLC/IGFBP5/MMP12/CCR7/PTPRC/GGT1…	207	BP
GO:0050679	positive regulation of epithelial cell proliferation	38/415	199/17910	4.64090366159063e-24	8.5120154270463e-23	3.24239494608304e-23	IGF1/FGFR1/BMP6/SHH/WNT5A/CTNNB1/CCND1/NOTCH2/VEGFA/TGFB1/MYC/TNFAIP3/MMP12/CCL11/HMOX1/IL10/EGFR/CCL5/SIRT1/NOD2/NME1/TWIST1/HMGB1/MTOR/PDGFB/STAT3/ARG1/AGTR1/FGF7/SP1/FGF2/CXCL12/GLUL/HIF1A/AKT1/F3/JUN/PRKCA	38	BP
GO:0048661	positive regulation of smooth muscle cell proliferation	29/415	101/17910	5.4852386581414e-24	1.00366807351944e-22	3.82317010232863e-23	MMP2/EDN1/IGF1/ELANE/AGT/PPARGC1A/PDGFRB/TNF/JAK2/PTGS2/IL13/STAT1/IGFBP5/HMGCR/HMOX1/IL10/MDM2/EGFR/TERT/CCL5/TGM2/MTOR/PDGFB/IL6/FGF2/TGFBR2/AKT1/JUN/MMP9	29	BP
GO:0002444	myeloid leukocyte mediated immunity	60/415	549/17910	5.56930219416204e-24	1.0166291534949e-22	3.87254141816843e-23	ELANE/C3/ALAD/HSPA8/GSTP1/GAA/HP/F2/B2M/VCP/IL13/SLC11A1/CR1/PTPRC/CD14/ANXA2/HMOX1/CXCR1/MMP8/MAPK1/LGALS3/HBB/CAT/IDH1/NFKB1/TLR2/HMGB1/DNASE1/PLAU/DSP/ALOX5/CD36/CXCR2/RHOA/SERPINA1/MAPK14/GSN/MPO/ARG1/SLPI/CAMP/PTX3/S100A8/IL6/HSP90AA1/ACE/PECAM1/TTR/LYN/PYGL/RNASE3/PIK3CG/TNFRSF1B/LTF/CXCL1/MIF/LCN2/CCL3/S100A9/MMP9	60	BP
GO:0050729	positive regulation of inflammatory response	34/415	153/17910	6.62020333149865e-24	1.20559863987126e-22	4.59236354824089e-23	C3/AGT/TNF/LDLR/JAK2/TNFRSF1A/WNT5A/PTGS2/AGER/CCR7/MMP8/EGFR/TLR7/LPL/IL1B/NFKBIA/NOD2/TLR2/TGM2/LBP/IL17A/AGTR1/S100A8/IL6/PIK3CG/IL2/CD81/TLR4/SERPINE1/TLR9/LTA/CEBPB/CCL3/S100A9	34	BP
GO:0042098	T cell proliferation	36/415	177/17910	7.76580642584763e-24	1.41087996176452e-22	5.37432068440519e-23	IGF1/LEP/FOXP3/SHH/SFTPD/AGER/CTNNB1/TGFB1/SLC11A1/PTPRC/IL10/LGALS3/IL4/CCL5/TP53/IL1B/HAVCR2/EPO/HMGB1/IL12RB1/IRF1/ARG1/TFRC/IL6/CASP3/IGF2/PIK3CG/IL2/TNFRSF1B/CD81/VCAM1/TGFBR2/CEBPB/CD274/BAX/CD40LG	36	BP
GO:0061041	regulation of wound healing	33/415	143/17910	8.5483689512872e-24	1.5457462444857e-22	5.8880530163541e-23	EDN1/CXCR4/APOE/NFE2L2/F2/AGER/TNFAIP3/HMGCR/PLAT/APOH/PDGFA/PLG/CDKN1A/PLAU/PTEN/SMAD3/CD36/THBD/MTOR/PDGFB/VTN/CD34/LYN/FGF2/CAV1/SH2B3/NOS3/TLR4/SERPINE1/TGFBR2/SERPINC1/F3/PRKCA	33	BP
GO:0062013	positive regulation of small molecule metabolic process	33/415	143/17910	8.5483689512872e-24	1.5457462444857e-22	5.8880530163541e-23	IGF1/GPD1/GCK/BMP6/PPARGC1A/TNF/EGF/PTGS2/VCP/FOXO1/INS/SRC/NFKB1/SIRT1/IL1B/CPT1A/SREBF1/TWIST1/PPARG/PDGFB/NR1H2/STAT3/PRKAA2/PPARA/IGF2/FABP1/IFNG/HIF1A/NOS3/NR1H4/INSR/AKT1/ADIPOQ	33	BP
GO:0042063	gliogenesis	44/415	285/17910	9.19236597189808e-24	1.65829419000086e-22	6.31677038988104e-23	CXCR4/GSTP1/TNF/LDLR/SHH/F2/AGER/CTNNB1/TGFB1/NKX2-1/MAPK1/MMP14/EGFR/SOD1/CREB1/TERT/IL1B/TLR2/TGFB2/PTEN/PTPN11/EZH2/CSF1/CDH2/KRAS/PPARG/RHOA/MTOR/GSN/VIM/STAT3/VTN/S100A8/CCL2/IL6/LYN/TNFRSF1B/MAPK3/RELA/TLR4/AKT1/LTA/CCL3/NOTCH1	44	BP
GO:0061138	morphogenesis of a branching epithelium	36/415	178/17910	9.53269665966334e-24	1.71566215057407e-22	6.53529629249938e-23	EDN1/FGFR1/MET/BCL2/EDNRA/AGT/TNF/EGF/SHH/WNT5A/BMP7/CTNNB1/ESR1/VEGFA/TGFB1/MYC/NKX2-1/CCL11/IL10/MMP14/PDGFA/SRC/AGTR2/HGF/PKD1/TGM2/RXRA/PKD2/CSF1/KRAS/SMAD4/VDR/ENG/FGF7/FGF2/TGFBR2	36	BP
GO:0045429	positive regulation of nitric oxide biosynthetic process	21/415	42/17910	9.61199404943081e-24	1.72589192219336e-22	6.57426351487139e-23	EDN1/ASS1/AGT/TNF/JAK2/PTGS2/MMP8/HBB/IL1B/AGTR2/PKD2/SMAD3/CD36/MTOR/PTX3/HSP90AA1/IFNG/ICAM1/TLR4/INSR/AKT1	21	BP
GO:0046983	protein dimerization activity	97/412	1285/16967	1.41598182523535e-24	1.92219532775699e-22	1.21662648931406e-22	XDH/HSPB1/NOS2/FGFR1/UGT1A1/FOXP3/APOE/BCL2/GPD1/IRF3/HPS4/TCF4/BMP6/ITGB1/PTGS2/CBS/CTNNB1/TYMS/VEGFA/TGFB1/MYC/SLC11A1/STAT1/GCLC/PTPRC/HMGCR/ABCD3/CCL11/HMOX1/SMAD2/TUBB2B/GSTM1/IL10/EGFR/IKBKB/SOD1/PDGFA/TERT/CCL5/TP53/LPL/CAT/CPOX/IDH1/NFKB1/AGXT/SREBF1/TLR2/TWIST1/HGF/TYMP/TGFB2/AXIN1/FASN/RXRA/PKD2/SMAD3/CSF1/TSC2/PPARG/MTTP/RAF1/PDGFB/CHUK/STAT3/AGTR1/UGT1A6/ADRB2/SMAD4/SCARB1/TFRC/HSP90A…	97	MF
GO:0031663	lipopolysaccharide-mediated signaling pathway	23/415	55/17910	1.27738129495083e-23	2.2882692894399e-22	8.71647008037853e-23	BMP6/TNF/TGFB1/TNFAIP3/MAPK1/CCL5/IL1B/NFKBIA/TLR2/CD36/LBP/MAPK14/SCARB1/CCL2/LYN/MAPK3/LTF/NOS3/TLR4/AKT1/MIF/CCL3/PRKCA	23	BP
GO:0016032	viral process	73/415	822/17910	1.40873682669607e-23	2.51770756119983e-22	9.59044581405573e-23	CXCR4/EP300/APOE/HSPD1/BCL2/IRF3/HSPA8/NFE2L2/TNF/CREBBP/ITGB1/LDLR/KRT8/TNFRSF1A/B2M/CTNNB1/ACE2/TYMS/PSMB8/TGFB1/MRC1/VCP/MMP1/STAT1/CR1/EIF2AK2/SLC10A1/MAPK1/MDM2/EGFR/IKBKB/CREB1/SRC/CCL5/TP53/CLDN1/SIRT1/NFKBIA/RXRA/SMAD3/IFNA2/CASP8/TSC2/RHOA/CXCL8/GSN/VIM/PCNA/ATG5/STAT3/SLPI/PTX3/SCARB1/TFRC/CCL2/RBCK1/LYN/CD80/SP1/CXCL12/TOP2A/NR5A2/ICAM1/CAV1/MAPK3/LTF/CD81/RELA/INSR/IFNB1/CCL3/JUN/BAX	73	BP
GO:0002275	myeloid cell activation involved in immune response	59/415	542/17910	1.69356052544175e-23	3.0197245099814e-22	1.15027276132702e-22	ELANE/C3/ALAD/HSPA8/GSTP1/GAA/HP/B2M/VCP/IL13/SLC11A1/CR1/PTPRC/CD14/ANXA2/HMOX1/CXCR1/MMP8/MAPK1/LGALS3/HBB/CAT/IDH1/NFKB1/TLR2/HAVCR2/HMGB1/DNASE1/PLAU/DSP/ALOX5/CD36/LBP/CXCR2/RHOA/SERPINA1/MAPK14/GSN/MPO/ARG1/SLPI/CAMP/PTX3/S100A8/HSP90AA1/PECAM1/TTR/LYN/PYGL/RNASE3/PIK3CG/TNFRSF1B/LTF/CXCL1/MIF/LCN2/CCL3/S100A9/MMP9	59	BP
GO:1904407	positive regulation of nitric oxide metabolic process	21/415	43/17910	1.83920403097713e-23	3.27182476343964e-22	1.2463027315174e-22	EDN1/ASS1/AGT/TNF/JAK2/PTGS2/MMP8/HBB/IL1B/AGTR2/PKD2/SMAD3/CD36/MTOR/PTX3/HSP90AA1/IFNG/ICAM1/TLR4/INSR/AKT1	21	BP
GO:0050671	positive regulation of lymphocyte proliferation	31/415	125/17910	1.94766619871568e-23	3.45677014714318e-22	1.31675208426602e-22	MPL/IGF1/LEP/FOXP3/BCL2/IL5/SHH/AGER/IL13/PTPRC/IL4/CCL5/CDKN1A/IL1B/HAVCR2/EPO/HMGB1/IL12RB1/TFRC/ADA/IL6/IGF2/IL2/CD81/TLR4/VCAM1/TGFBR2/TLR9/MIF/CD274/CD40LG	31	BP
GO:0048589	developmental growth	63/415	624/17910	2.70296270004275e-23	4.78623694696509e-22	1.82317226990514e-22	EDN1/CXCR4/IGF1/EP300/SEMA4D/FGFR1/LEP/GNAS/APOE/PTK2/BCL2/EZR/AGT/RARB/FN1/PDGFRB/ITGB1/SHH/SPP1/WNT5A/CTNNB1/ESR1/TYMS/VEGFA/TGFB1/CCL11/SMAD2/BRCA2/MAPK1/SOD1/CREB1/BBS4/TP53/CDKN1A/HAMP/AGTR2/TGFB2/PTEN/RXRA/PTPN11/SMAD3/EZH2/CSF1/MTOR/MAPK14/GSN/STAT3/PTX3/ADRB2/SMAD4/HSP90AA1/PPARA/RBP4/IGF2/FGF7/PIK3CA/FGF2/CXCL12/CD81/INSR/TGFBR2/AKT1/NOTCH1	63	BP
GO:0062012	regulation of small molecule metabolic process	53/415	439/17910	2.93197275497995e-23	5.17981853379791e-22	1.97309527685402e-22	IGF1/EP300/LEP/BRCA1/APOE/GPD1/GCK/BMP6/PPARGC1A/SNAI1/TNF/EGF/LDLR/PTGS2/PSMB8/TGFB1/VCP/FOXO1/IGFBP5/HMGCR/INS/SOD1/SRC/TP53/NFKB1/SIRT1/IL1B/IGFBP3/CPT1A/SREBF1/TWIST1/FASN/APOC3/PPARG/RHOA/MTOR/PDGFB/NR1H2/STAT3/VDR/PRKAA2/PPARA/IGF2/FABP1/SP1/IFNG/CAV1/HIF1A/NOS3/NR1H4/INSR/AKT1/ADIPOQ	53	BP
GO:0045088	regulation of innate immune response	53/415	440/17910	3.26596612628416e-23	5.75663983497563e-22	2.19281791337427e-22	EP300/LEP/APOE/HSPD1/IRF3/CREBBP/JAK2/SFTPD/XIAP/WNT5A/ESR1/PSMB8/TNFAIP3/STAT1/MMP12/CR1/CD14/INS/IKBKB/TLR7/SRC/CCL5/NFKB1/NFKBIA/NOD2/TLR2/HAVCR2/HMGB1/IRF1/PTPN11/CD36/LBP/CASP8/KRAS/PPARG/RAF1/CHUK/NR1H2/ARG1/S100A8/LYN/IFNG/CAV1/LTF/HSP90B1/RELA/NR1H4/TLR4/TLR9/JAK1/MUC5AC/IFNB1/S100A9	53	BP
GO:0014066	regulation of phosphatidylinositol 3-kinase signaling	30/415	117/17910	3.52611965213686e-23	6.20096785507364e-22	2.36207123993559e-22	IGF1/SEMA4D/FGFR1/LEP/PTK2/AGT/PDGFRB/TNF/JAK2/F2/INS/MAPK1/EGFR/PDGFA/SRC/CCL5/CAT/SIRT1/TWIST1/EPO/HGF/TGFB2/PTEN/TSC2/PDGFB/CSF3/LYN/PIK3CG/PIK3CA/MAPK3	30	BP
GO:0061061	muscle structure development	64/415	647/17910	3.53957623805711e-23	6.21042086517554e-22	2.3656720783554e-22	EDN1/IGF1/EP300/SOD2/FGFR1/BCL2/ASS1/ACTC1/AGT/RARB/PDGFRB/TNF/ITGB1/KRT8/SHH/WNT5A/CTNNB1/VEGFA/TGFB1/IGFBP5/HMGCR/MAPK1/MMP14/CREB1/CXCL10/SIRT1/IGFBP3/HAMP/AGTR2/TWIST1/TGFB2/PTEN/DSP/RXRA/NOS1/SMAD3/EZH2/CDH2/KRAS/RHOA/MTOR/MAPK14/SMAD7/PDGFB/ELN/CALR/ATG5/CHUK/NOX4/SMAD4/CASP3/COL3A1/ENG/PPARA/RBP4/IGF2/DDIT3/FOS/FGF2/CAV1/CD81/TGFBR2/AKT1/NOTCH1	64	BP
GO:0014065	phosphatidylinositol 3-kinase signaling	32/415	138/17910	3.54949288606006e-23	6.21363390190697e-22	2.36689598756337e-22	EDN1/IGF1/SEMA4D/FGFR1/LEP/PTK2/AGT/PDGFRB/TNF/JAK2/F2/INS/MAPK1/EGFR/PDGFA/SRC/CCL5/CAT/SIRT1/TWIST1/EPO/HGF/TGFB2/PTEN/TSC2/PDGFB/CSF3/LYN/PIK3CG/PIK3CA/MAPK3/AKT1	32	BP
GO:0001935	endothelial cell proliferation	36/415	185/17910	3.8514187877904e-23	6.72685304185664e-22	2.56239130355146e-22	XDH/FGFR1/LEP/APOE/BMP6/TNF/WNT5A/VEGFA/STAT1/CCL11/HMOX1/IL10/MMP14/APOH/SIRT1/HMGB1/PPARG/MTOR/PDGFB/STAT3/ARG1/AGTR1/SCARB1/CCL2/CD34/SP1/FGF2/CXCL12/CAV1/HIF1A/AKT1/SPARC/F3/APOA1/JUN/PRKCA	36	BP
GO:0051897	positive regulation of protein kinase B signaling	35/415	173/17910	4.03036664235236e-23	7.00754924128459e-22	2.66931403486114e-22	FGFR1/MET/LEP/PTK2/PDGFRB/TNF/EGF/ITGB1/THPO/ESR1/TGFB1/IGFBP5/CCR7/INS/EGFR/PDGFA/SRC/HGF/PTPN11/MTOR/PDGFB/CSF3/NOX4/HSP90AA1/ENG/IGF2/CD80/PIK3CG/FGF7/PIK3CA/FGF2/INSR/TXN/F3/CCL3	35	BP
GO:1903034	regulation of response to wounding	35/415	173/17910	4.03036664235236e-23	7.00754924128459e-22	2.66931403486114e-22	EDN1/CXCR4/APOE/NFE2L2/SPP1/F2/AGER/TNFAIP3/HMGCR/IL10/PLAT/APOH/PDGFA/PLG/CDKN1A/PLAU/PTEN/SMAD3/CD36/THBD/MTOR/PDGFB/VTN/CD34/LYN/FGF2/CAV1/SH2B3/NOS3/TLR4/SERPINE1/TGFBR2/SERPINC1/F3/PRKCA	35	BP
GO:0003006	developmental process involved in reproduction	64/415	649/17910	4.18512217628274e-23	7.26019501686971e-22	2.7655518052138e-22	IGF1/LEP/PTK2/BCL2/BMP6/SNAI1/PDGFRB/IL1A/KRT8/SHH/SPP1/WNT5A/PTGS2/BMP7/CTNNB1/CCND1/ESR1/VEGFA/TGFB1/NKX2-1/BRCA2/IL10/MAPK1/MMP14/EGFR/SOD1/BBS4/SRC/IDH1/SIRT1/IL1B/REN/TGFB2/PTEN/PKD1/RXRA/PKD2/PTPN11/CSF1/CASP8/PPARG/AFP/MTOR/MAPK14/PDGFB/PTX3/SMAD4/ADA/CASP3/VDR/RBP4/IGF2/HSPA5/ICAM1/MAPK3/HNF4A/HIF1A/NOS3/CFTR/INSR/AKT1/CEBPB/BAX/CSF2	64	BP
GO:0002819	regulation of adaptive immune response	33/415	150/17910	4.37513655389027e-23	7.55571335205545e-22	2.87812058104526e-22	FOXP3/C3/HSPD1/TNF/B2M/AGER/TGFB1/SLC11A1/TNFAIP3/CR1/PTPRC/IL10/IL4/SIRT1/IL1B/HAVCR2/HMGB1/IL12RB1/IRF1/NLRP3/IFNA2/SMAD7/ARG1/TFRC/ADA/IL6/CD80/IL2/TNFRSF1B/CD81/LTA/IFNB1/CD274	33	BP
GO:0097696	STAT cascade	33/415	150/17910	4.37513655389027e-23	7.55571335205545e-22	2.87812058104526e-22	IGF1/LEP/IL5/AGT/TNF/EGF/THPO/JAK2/TNFRSF1A/F2/IL13/STAT1/PTPRC/IL10/IL4/CCL5/EPO/PKD1/PKD2/IFNA2/STAT4/STAT3/CCL2/IL6/PECAM1/LYN/IL2/IFNG/CAV1/SH2B3/IFNB1/NOTCH1/CSF2	33	BP
GO:0050920	regulation of chemotaxis	36/415	186/17910	4.67667636125962e-23	8.05835377495072e-22	3.06958625458178e-22	EDN1/HSPB1/CXCR4/FGFR1/MET/ELANE/GSTP1/PDGFRB/WNT5A/AGER/VEGFA/TGFB1/CCR7/TUBB2B/CXCL10/CCL5/HMGB1/SMAD3/CSF1/LBP/CXCR2/CXCL8/MAPK14/PDGFB/CALR/CCL2/IL6/LYN/FGF2/CXCL12/MAPK3/SERPINE1/MIF/F3/CCL3/NOTCH1	36	BP
GO:0045428	regulation of nitric oxide biosynthetic process	24/415	65/17910	4.92613661165986e-23	8.46920802250694e-22	3.2260887594551e-22	EDN1/ASS1/AGT/TNF/JAK2/PTGS2/MMP8/IL10/HBB/IL1B/AGTR2/PKD2/SMAD3/CD36/MTOR/PTX3/HSP90AA1/CD34/IFNG/ICAM1/CAV1/TLR4/INSR/AKT1	24	BP
GO:0007259	JAK-STAT cascade	32/415	140/17910	5.73062596330141e-23	9.83032601070789e-22	3.74456550844484e-22	IGF1/LEP/IL5/AGT/TNF/EGF/JAK2/TNFRSF1A/F2/IL13/STAT1/PTPRC/IL10/IL4/CCL5/EPO/PKD1/PKD2/IFNA2/STAT4/STAT3/CCL2/IL6/PECAM1/LYN/IL2/IFNG/CAV1/SH2B3/IFNB1/NOTCH1/CSF2	32	BP
GO:0060249	anatomical structure homeostasis	51/415	413/17910	7.47522445340301e-23	1.27944543261475e-21	4.87366058021656e-22	HSPB1/GNAS/BCL2/TF/GAA/NOP10/SFTPD/B2M/CTNNB1/VEGFA/TGFB1/MYC/TNFAIP3/SLC22A5/FH/BGLAP/BRCA2/MAPK1/EGFR/SOD1/BBS4/TERT/SRC/POLE/ALB/NOD2/PTPN11/CSF1/TNFRSF11B/KRAS/CALCA/NHP2/PCNA/NOX4/ADRB2/DKC1/TFRC/IL6/HSP90AA1/CD34/RBP4/MAPK3/LTF/HIF1A/NOS3/ACTB/TLR4/TLR9/NAF1/BAX/PRKCA	51	BP
GO:0090130	tissue migration	48/415	363/17910	7.65819325377413e-23	1.30784922567232e-21	4.98185624298149e-22	EDN1/HSPB1/FGFR1/MET/APOE/PTK2/ACTC1/AGT/NFE2L2/ITGB1/WNT5A/PTGS2/VEGFA/TGFB1/HMOX1/APOH/IL4/SRC/SIRT1/AGTR2/HMGB1/TGFB2/PTEN/PTPN11/PPARG/RHOA/MTOR/PDGFB/CALR/SCARB1/PECAM1/FGF7/SP1/PIK3CA/IFNG/FGF2/GLUL/HIF1A/NOS3/TGFBR2/AKT1/SPARC/ACTA2/APOA1/JUN/NOTCH1/PRKCA/MMP9	48	BP
GO:0015850	organic hydroxy compound transport	39/415	228/17910	7.83670893480253e-23	1.33536825197245e-21	5.08668165426207e-22	LEP/APOE/AGT/BMP6/EGF/LDLR/ABCC2/SHH/SPP1/SLCO1B1/PCSK9/ANXA2/SLC10A1/CETP/ABCB11/NFKB1/SIRT1/REN/NFKBIA/AGTR2/SLCO1B3/RXRA/NOS1/PTPN11/APOC3/CD36/PPARG/NR1H2/AGTR1/SCARB1/RBP4/CXCL12/CAV1/ABCB4/CFTR/NR1H4/ACTB/APOA1/ADIPOQ	39	BP
GO:0060284	regulation of cell development	75/415	893/17910	9.55078433134805e-23	1.62384463686747e-21	6.18554523183021e-22	EDN1/CXCR4/MPL/IGF1/EP300/SEMA4D/FGFR1/DGUOK/APOE/PTK2/BCL2/IL5/AGT/RARB/TCF4/FN1/NFE2L2/BMP6/TNF/LDLR/SHH/TNFRSF1A/SPP1/F2/WNT5A/BMP7/B2M/AGER/CTNNB1/NOTCH2/VEGFA/TGFB1/INS/TUBB2B/MDM2/IKBKB/CREB1/TERT/TP53/IL1B/HAMP/TLR2/NME1/EPO/HGF/PTEN/NOS1/EZH2/CSF1/CDH2/PPARG/RHOA/MTOR/VIM/CALR/STAT3/SMAD4/IL6/COL3A1/PPARA/LYN/IL2/HSPA5/CXCL12/TNFRSF1B/LTF/RELA/HIF1A/AKT1/APOA1/LTA/CCL3/NOTCH1/S100A9/ADIPOQ	75	BP
GO:0002718	regulation of cytokine production involved in immune response	26/415	83/17910	1.01795805988479e-22	1.72693326494803e-21	6.57823019528197e-22	FOXP3/TNF/WNT5A/B2M/TGFB1/HMOX1/IL10/IL1B/NOD2/TGFB2/NLRP3/IFNA2/CD36/MAPK14/SMAD7/ATG5/ARG1/IL6/TGFB3/TNFRSF1B/MAPK3/CD81/TLR4/MIF/APOA1/IFNB1	26	BP
GO:0060485	mesenchyme development	41/415	258/17910	1.08201213426452e-22	1.83155578233983e-21	6.97675804634739e-22	EDN1/FGFR1/COL1A1/BCL2/EDNRA/ACTC1/FN1/SNAI1/PDGFRB/SHH/WNT5A/BMP7/CTNNB1/TGFB1/MYC/NKX2-1/STAT1/EXOC4/SMAD2/MAPK1/MDM2/IL1B/TWIST1/HGF/TGFB2/PTEN/PKD2/SMAD3/EZH2/MTOR/SMAD7/SMAD4/IL6/ENG/TGFB3/MAPK3/HIF1A/NOS3/TGFBR2/ACTA2/NOTCH1	41	BP
GO:0044877	protein-containing complex binding	80/412	938/16967	1.8422782157297e-23	2.22301571364718e-21	1.40702652031754e-21	IGF1/APOE/HSPD1/ALAD/EZR/CRP/HSPA8/RARB/FN1/ITGB1/LDLR/KRT8/SPP1/AGER/CCND1/MYC/PCSK9/VCP/MMP12/INS/MMP14/MDM2/EGFR/LGALS3/PDGFA/SRC/PLG/TP53/UMOD/CDKN1A/LPL/HADHA/SIRT1/IL1B/SREBF1/NOD2/TLR2/NME1/HMGB1/PTEN/MTHFR/PTPN11/SMAD3/EZH2/CD36/CASP8/KRAS/MTOR/GSN/SMAD7/PDGFB/VIM/CALR/PCNA/VTN/ADRB2/SMAD4/SCARB1/HSP90AA1/CASP3/COL3A1/ENG/PPARA/LYN/IGF2/HSPA5/FGF2/CXCL12/ICAM1/CD81/RELA/CFTR/ACTB/VCAM1/IN…	80	MF
GO:0002009	morphogenesis of an epithelium	57/415	527/17910	1.41285952886461e-22	2.38633527018121e-21	9.09002278721221e-22	EDN1/CXCR4/FGFR1/MET/AIRE/BCL2/EDNRA/AGT/SNAI1/TNF/EGF/SHH/WNT5A/BMP7/CTNNB1/ESR1/PSMB8/VEGFA/TGFB1/MYC/NKX2-1/STAT1/IGFBP5/MMP12/CCL11/IL10/MMP14/EGFR/PDGFA/BBS4/SRC/CXCL10/AGTR2/TWIST1/HGF/TGFB2/PTEN/PKD1/TGM2/RXRA/PKD2/MTHFR/SMAD3/CSF1/CXCR2/TSC2/KRAS/RHOA/MTOR/SMAD4/VDR/ENG/FGF7/FGF2/HIF1A/TGFBR2/NOTCH1	57	BP
GO:0001763	morphogenesis of a branching structure	36/415	192/17910	1.46002446369954e-22	2.46058947445854e-21	9.37287173025951e-22	EDN1/FGFR1/MET/BCL2/EDNRA/AGT/TNF/EGF/SHH/WNT5A/BMP7/CTNNB1/ESR1/VEGFA/TGFB1/MYC/NKX2-1/CCL11/IL10/MMP14/PDGFA/SRC/AGTR2/HGF/PKD1/TGM2/RXRA/PKD2/CSF1/KRAS/SMAD4/VDR/ENG/FGF7/FGF2/TGFBR2	36	BP
GO:0001818	negative regulation of cytokine production	43/415	290/17910	1.57438742065858e-22	2.64752020301121e-21	1.00849278287493e-21	IGF1/FGFR1/ELANE/FOXP3/IRF3/EZR/GSTP1/FN1/TNF/SFTPD/F2/AGER/TGFB1/IL13/SLC11A1/TNFAIP3/PTPRC/HMOX1/MMP8/IL10/NFKB1/HAVCR2/TWIST1/HGF/HMGB1/TGFB2/NLRP3/IFNA2/LBP/SMAD7/ARG1/IL6/CD34/TGFB3/IFNG/LTF/NR1H4/TLR4/TLR9/APOA1/IFNB1/CD274/ADIPOQ	43	BP
GO:0022008	neurogenesis	99/415	1492/17910	2.29322857829932e-22	3.84791738520311e-21	1.46574779964385e-21	CXCR4/EP300/SEMA4D/FGFR1/LEP/DGUOK/APOE/C3/PTK2/BCL2/EZR/AGT/RARB/GSTP1/TCF4/FN1/NFE2L2/BMP6/TNF/ITGB1/LDLR/SHH/JAK2/SPP1/F2/WNT5A/BMP7/B2M/AGER/CTNNB1/VEGFA/TGFB1/PCSK9/NKX2-1/TUBB2B/MAPK1/MMP14/MDM2/EGFR/SOD1/CREB1/BBS4/TERT/SRC/TP53/IL1B/TLR2/NME1/TWIST1/EPO/HGF/HMGB1/TGFB2/PTEN/NOS1/PTPN11/EZH2/CSF1/CDH2/KRAS/PPARG/RHOA/MTOR/GSN/VIM/CALR/STAT3/VTN/SMAD4/TUBB3/S100A8/CCL2/IL6/HSP90AA1/CASP3/CO…	99	BP
GO:0002822	regulation of adaptive immune response based on somatic recombination of immune receptors built from immunoglobulin superfamily domains	31/415	135/17910	2.37980222062949e-22	3.98448367440907e-21	1.5177685989154e-21	FOXP3/C3/HSPD1/TNF/B2M/AGER/TGFB1/SLC11A1/TNFAIP3/CR1/PTPRC/IL10/IL4/IL1B/HAVCR2/HMGB1/IL12RB1/NLRP3/IFNA2/SMAD7/ARG1/TFRC/ADA/IL6/CD80/IL2/TNFRSF1B/CD81/LTA/IFNB1/CD274	31	BP
GO:1901342	regulation of vasculature development	51/415	425/17910	2.76789676934268e-22	4.62419275486924e-21	1.76144643376247e-21	XDH/HSPB1/CXCR4/SOD2/LEP/BRCA1/C3/AGT/NFE2L2/IL1A/ITGB1/WNT5A/PTGS2/BMP7/CTNNB1/VEGFA/TNFAIP3/STAT1/CCL11/HMOX1/IL10/APOH/TERT/CXCL10/SIRT1/IL1B/TWIST1/HGF/TGFB2/CXCR2/PPARG/RHOA/CXCL8/PDGFB/STAT3/AGTR1/IL6/CD34/ENG/SP1/FGF2/GLUL/HIF1A/NOS3/SERPINE1/TGFBR2/JAK1/SPARC/F3/NOTCH1/PRKCA	51	BP
GO:0043406	positive regulation of MAP kinase activity	40/415	250/17910	2.83213539060064e-22	4.72124956112059e-21	1.79841728993273e-21	EDN1/CXCR4/IGF1/FGFR1/ELANE/PDGFRB/TNF/EGF/JAK2/WNT5A/AGER/VEGFA/TGFB1/PTPRC/EIF2AK2/MAPK1/EGFR/SOD1/PDGFA/SRC/IL1B/NOD2/HGF/PTPN11/EZH2/KRAS/MAPK14/RAF1/PDGFB/NOX4/TGFB3/PIK3CG/FGF2/MAPK3/CD81/TLR4/INSR/TLR9/MIF/CD40LG	40	BP
GO:2001234	negative regulation of apoptotic signaling pathway	38/415	223/17910	3.2781530531195e-22	5.45294506779727e-21	2.07713457296089e-21	HSPB1/IGF1/SOD2/BRCA1/BCL2/GSTP1/NFE2L2/SNAI1/TNF/IL1A/PTGS2/CTNNB1/TNFAIP3/GCLC/HMOX1/INS/MDM2/LGALS3/TERT/SRC/SIRT1/IL1B/EPO/HGF/FAS/CASP8/RAF1/CXCL12/ICAM1/RELA/HIF1A/NOS3/SERPINE1/AKT1/MIF/BAX/CSF2/MMP9	38	BP
GO:0031668	cellular response to extracellular stimulus	40/415	251/17910	3.29946568280085e-22	5.4765429313876e-21	2.08612346569721e-21	LEP/COL1A1/BCL2/HSPA8/GSTP1/NFE2L2/PTGS2/CBS/PCSK9/FOXO1/PTPRC/EIF2AK2/HMOX1/BGLAP/MAPK1/MDM2/SOD1/MAPK8/TP53/CDKN1A/LPL/SIRT1/ALB/SREBF1/FAS/PPARG/MTOR/VDR/PRKAA2/LYN/FOS/HSPA5/GLUL/ICAM1/MAPK3/HSP90B1/NR1H4/VCAM1/LCN2/JUN	40	BP
GO:0002446	neutrophil mediated immunity	55/415	499/17910	3.40910540815237e-22	5.64633083225236e-21	2.15079903359159e-21	ELANE/C3/ALAD/HSPA8/GSTP1/GAA/HP/F2/B2M/VCP/SLC11A1/CR1/PTPRC/CD14/ANXA2/CXCR1/MMP8/MAPK1/LGALS3/HBB/CAT/IDH1/NFKB1/TLR2/HMGB1/DNASE1/PLAU/DSP/ALOX5/CD36/CXCR2/RHOA/SERPINA1/MAPK14/GSN/MPO/ARG1/SLPI/CAMP/PTX3/S100A8/IL6/HSP90AA1/ACE/PECAM1/TTR/PYGL/RNASE3/TNFRSF1B/LTF/CXCL1/MIF/LCN2/S100A9/MMP9	55	BP
GO:1901214	regulation of neuron death	44/415	313/17910	4.41584301385444e-22	7.298011518596e-21	2.7799568582975e-21	SOD2/APOE/BCL2/PPARGC1A/TNF/JAK2/WNT5A/CTNNB1/PCSK9/IL13/GCLC/HMOX1/IL10/SOD1/CREB1/TERT/CCL5/TP53/SIRT1/EPO/TGFB2/CSF1/CASP8/KRAS/RHOA/MTOR/CSF3/STAT3/CCL2/CASP3/CD34/PPARA/TGFB3/PIK3CA/DDIT3/FOS/TNFRSF1B/HIF1A/TLR4/AKT1/CEBPB/CCL3/JUN/BAX	44	BP
GO:0042129	regulation of T cell proliferation	32/415	149/17910	4.47555135067363e-22	7.38081805363236e-21	2.81149950445524e-21	IGF1/LEP/FOXP3/SHH/SFTPD/AGER/CTNNB1/TGFB1/PTPRC/IL10/LGALS3/IL4/CCL5/IL1B/HAVCR2/EPO/HMGB1/IL12RB1/IRF1/ARG1/TFRC/IL6/CASP3/IGF2/IL2/TNFRSF1B/CD81/VCAM1/TGFBR2/CEBPB/CD274/CD40LG	32	BP
GO:0051051	negative regulation of transport	55/415	502/17910	4.54491697551554e-22	7.47916208925844e-21	2.84896069174095e-21	EDN1/LEP/FOXP3/APOE/BCL2/EZR/FN1/TNF/EGF/SHH/TNFRSF1A/PTGS2/TGFB1/PCSK9/TNFAIP3/HMGCR/HMOX1/INS/IL10/LGALS3/GPR35/NFKB1/IL1B/HAMP/SREBF1/TLR2/AGTR2/TWIST1/EPO/HMGB1/PTEN/NLRP3/NOS1/PKD2/PTPN11/APOC3/IFNA2/CD36/MTOR/ATG5/NR1H2/ADA/CD34/ICAM1/CAV1/TNFRSF1B/NOS3/NR1H4/TLR9/AKT1/TXN/APOA1/NOTCH1/MMP9/ADIPOQ	55	BP
GO:0010817	regulation of hormone levels	55/415	503/17910	4.99966127545952e-22	8.20991386792871e-21	3.12731849011537e-21	EDN1/NOS2/FGFR1/UGT1A1/LEP/GNAS/GCK/TFR2/CYP1A1/AGT/BMP6/PPARGC1A/TNF/ABCC2/SHH/JAK2/SPP1/ESR1/ACE2/HMGCR/INS/SMAD2/EGFR/CREB1/AKR1D1/CCL5/NFKB1/IL1B/REN/CPT1A/SREBF1/AGTR2/PTPN11/AFP/RAF1/AGTR1/SMAD4/SCARB1/IL6/VDR/ACE/TTR/UGT1A9/LYN/RBP4/IFNG/GLUL/HNF4A/HIF1A/CFTR/NR1H4/APOA1/PRKCA/CYP3A4/ADIPOQ	55	BP
GO:0002683	negative regulation of immune system process	52/415	451/17910	6.58935304370674e-22	1.07972661281207e-20	4.11289211413948e-21	FOXP3/EZR/NFE2L2/TNF/LDLR/SHH/SFTPD/CTNNB1/TGFB1/MYC/TNFAIP3/MMP12/CR1/PTPRC/CD14/HMOX1/INS/IL10/LGALS3/IL4/NFKBIA/HAVCR2/NME1/HMGB1/TGFB2/IRF1/IFNA2/CXCR2/PPARG/SMAD7/NR1H2/ARG1/CCL2/ADA/CASP3/COL3A1/LYN/TGFB3/IL2/CXCL12/LTF/TLR4/TLR9/AKT1/MIF/APOA1/IFNB1/CEBPB/CCL3/NOTCH1/CD274/ADIPOQ	52	BP
GO:0036230	granulocyte activation	55/415	506/17910	6.64582787428848e-22	1.0866635577427e-20	4.13931630871137e-21	ELANE/C3/ALAD/HSPA8/GSTP1/GAA/HP/B2M/VCP/SLC11A1/CR1/PTPRC/CD14/ANXA2/CXCR1/MMP8/MAPK1/LGALS3/HBB/CCL5/CAT/IDH1/NFKB1/TLR2/HMGB1/DNASE1/PLAU/DSP/ALOX5/CD36/CXCR2/RHOA/SERPINA1/CXCL8/MAPK14/GSN/MPO/ARG1/SLPI/CAMP/PTX3/S100A8/HSP90AA1/PECAM1/TTR/PYGL/RNASE3/TNFRSF1B/LTF/CXCL1/MIF/LCN2/CCL3/S100A9/MMP9	55	BP
GO:0071466	cellular response to xenobiotic stimulus	33/415	164/17910	8.78557092037389e-22	1.43348434231578e-20	5.46042523847576e-21	UGT1A1/CYP2D6/CYP2C19/ASS1/CYP1A1/GSTP1/PPARGC1A/CYP3A5/ABCC2/CYP2C9/TGFB1/FOXO1/GGT1/GSTM1/EGFR/NAT2/AGTR2/NR3C1/PDGFB/PCNA/ARG1/CYP2E1/UGT1A6/AIP/UGT1A9/CYP1A2/EPHX1/ICAM1/HNF4A/GSTM3/CYP2B6/NR1I2/CYP3A4	33	BP
GO:0032147	activation of protein kinase activity	43/415	303/17910	9.18200244918849e-22	1.49499340724605e-20	5.69472542622506e-21	CXCR4/IGF1/LEP/AGT/TNF/EGF/JAK2/WNT5A/VEGFA/SLC11A1/PTPRC/EIF2AK2/INS/MAPK1/EGFR/SOD1/IL4/SRC/CCL5/IL1B/NOD2/EPO/HGF/TGFB2/AXIN1/PTPN11/CALCA/MTOR/MAPK14/RAF1/PDGFB/ADRB2/TGFB3/PIK3CA/FGF2/MAPK3/CD81/TLR4/INSR/TGFBR2/AKT1/TXN/CD40LG	43	BP
GO:0034645	cellular macromolecule biosynthetic process	197/415	4634/17910	9.22537221456077e-22	1.498879185389e-20	5.70952712333225e-21	EDN1/HSPB1/IGF1/EP300/SOD2/SEMA4D/FGFR1/MET/LEP/BRCA1/ELANE/COL1A1/FOXP3/BIRC5/APOE/AIRE/HSPD1/BCL2/GCK/TFR2/IRF3/EZR/IL5/AGT/PKHD1/HSPA8/RARB/TCF4/NFE2L2/NR1I3/BMP6/PPARGC1A/SNAI1/PDGFRB/TNF/EGF/IL1A/CREBBP/NOP10/SHH/JAK2/TNFRSF1A/SPP1/XIAP/WNT5A/BMP7/AGER/CTNNB1/CCND1/NOTCH2/ESR1/TYMS/PSMB8/VEGFA/TGFB1/MYC/NKX2-1/VCP/SLC11A1/TNFAIP3/FOXO1/STAT1/GCLC/IGFBP5/MMP12/CCR7/GGT1/EIF2AK2/HMOX1/INS/SMAD…	197	BP
GO:0098552	side of membrane	46/415	359/18675	4.54222628034515e-22	1.51327854497815e-20	8.58115879001494e-21	TF/TFR2/EZR/PKHD1/HSPA8/TNF/ITGB1/LDLR/F2/B2M/SCNN1B/PCSK9/IL13/PTPRC/CD14/IKBKB/CXCL10/PLG/SCNN1G/HLA-C/PTEN/PKD2/CD36/KRAS/RHOA/IL17A/CALR/HLA-A/CHUK/TFRC/ADA/ANXA5/ACE/CD34/ENG/PECAM1/CDH1/ICAM1/TLR4/VCAM1/INSR/TGFBR2/HLA-B/CANX/F3/CD40LG	46	CC
GO:0098772	molecular function regulator	102/412	1492/16967	1.39764921064334e-22	1.51784704275867e-20	9.6069993110537e-21	EDN1/HSPB1/IGF1/UGT1A1/BIRC5/GNAS/APOE/C3/BCL2/IL5/AGT/HPS4/GSTP1/FN1/BMP6/TNF/EGF/IL1A/SHH/THPO/SPP1/F2/WNT5A/BMP7/ESR1/VEGFA/TGFB1/PCSK9/VCP/IL13/ANXA2/EIF2AK2/CCL11/INS/IL10/EGFR/APOH/LGALS3/PDGFA/IL4/SCT/MAPK8/BMP1/GFER/CXCL10/CCL5/TP53/CDKN1A/IL1B/IGFBP3/HAMP/SREBF1/AGTR2/EPO/HGF/TYMP/HMGB1/TGFB2/NOS1/APOC3/CSF1/TNFRSF11B/TSC2/CALCA/SERPINA1/CXCL8/IL17A/RAF1/PDGFB/CSF3/SLPI/ADRB2/IL6/ANXA5/H…	102	MF
GO:0050921	positive regulation of chemotaxis	30/415	130/17910	9.85807697469958e-22	1.59829792300773e-20	6.08823274853199e-21	EDN1/HSPB1/CXCR4/FGFR1/MET/PDGFRB/WNT5A/AGER/VEGFA/TGFB1/CCR7/TUBB2B/CXCL10/CCL5/HMGB1/SMAD3/CSF1/LBP/CXCR2/CXCL8/MAPK14/PDGFB/CALR/IL6/FGF2/CXCL12/MAPK3/SERPINE1/F3/CCL3	30	BP
GO:0031012	extracellular matrix	52/415	468/18675	5.76735320159484e-22	1.82536728830477e-20	1.0350881272336e-20	MMP2/MMP7/ELANE/COL1A1/APOE/AGT/FN1/SHH/F2/WNT5A/BMP7/VEGFA/TGFB1/MMP1/MMP12/ANXA2/MMP3/MMP8/MMP14/APOH/LGALS3/PLG/COL1A2/TGFB2/TGM2/APOC3/IFNA2/TNFRSF11B/CDH2/SERPINA1/PDGFB/ELN/CALR/SLPI/VTN/PTX3/S100A8/ANXA5/COL3A1/TGFB3/CXCL12/ICAM1/HSP90B1/SERPINE1/SPARC/SERPINC1/F3/APOA1/PRSS1/S100A9/MMP9/ADIPOQ	52	CC
GO:1901654	response to ketone	35/415	191/17910	1.28041102377016e-21	2.07157025635236e-20	7.89102062516304e-21	EDN1/ASS1/ABCC2/SPP1/CCND1/TYMS/TGFB1/FOXO1/CCR7/BGLAP/EGFR/SRC/CDKN1A/CLDN1/SIRT1/SREBF1/TLR2/NME1/AGTR2/EPO/TGFB2/PPARG/NR3C1/CALR/PCNA/ARG1/PRKAA2/TGFB3/FOS/ICAM1/CAV1/ABCB4/RELA/CFTR/AKT1	35	BP
GO:0043299	leukocyte degranulation	56/415	532/17910	1.28558303713774e-21	2.07556841184949e-20	7.90625038982765e-21	ELANE/C3/ALAD/HSPA8/GSTP1/GAA/HP/B2M/VCP/IL13/SLC11A1/CR1/PTPRC/CD14/ANXA2/HMOX1/CXCR1/MMP8/MAPK1/LGALS3/HBB/CAT/IDH1/NFKB1/TLR2/HMGB1/PLAU/DSP/ALOX5/CD36/CXCR2/RHOA/SERPINA1/MAPK14/GSN/MPO/ARG1/SLPI/CAMP/PTX3/S100A8/HSP90AA1/PECAM1/TTR/LYN/PYGL/RNASE3/PIK3CG/TNFRSF1B/LTF/CXCL1/MIF/LCN2/CCL3/S100A9/MMP9	56	BP
GO:0010631	epithelial cell migration	46/415	354/17910	1.32618527998766e-21	2.13663183998012e-20	8.13885305891135e-21	EDN1/HSPB1/FGFR1/MET/APOE/PTK2/AGT/NFE2L2/ITGB1/WNT5A/PTGS2/VEGFA/TGFB1/HMOX1/APOH/IL4/SRC/SIRT1/AGTR2/HMGB1/TGFB2/PTEN/PTPN11/PPARG/RHOA/MTOR/PDGFB/CALR/SCARB1/PECAM1/FGF7/SP1/PIK3CA/IFNG/FGF2/GLUL/HIF1A/NOS3/TGFBR2/AKT1/SPARC/APOA1/JUN/NOTCH1/PRKCA/MMP9	46	BP
GO:0006631	fatty acid metabolic process	45/415	339/17910	1.56490246472582e-21	2.51595720531755e-20	9.58377836248073e-21	EDN1/LEP/BRCA1/CYP2D6/CYP2C19/C3/CYP1A1/GSTP1/PPARGC1A/TNFRSF1A/PTGS2/CYP2C9/ABCD3/GGT1/INS/PNPLA3/ACADM/HADHB/LPL/HADHA/SIRT1/IL1B/CPT1A/SREBF1/TWIST1/ALOX5/FASN/APOC3/CD36/PPARG/MTOR/MAPK14/NR1H2/CYP2E1/CPT2/PRKAA2/PPARA/CYP1A2/FABP1/CAV1/MAPK3/AKT1/MIF/CYP3A4/ADIPOQ	45	BP
GO:0071248	cellular response to metal ion	33/415	167/17910	1.60367728384042e-21	2.57291438962707e-20	9.80073953710629e-21	EDN1/TF/ALAD/TFR2/CYP1A1/NFE2L2/BMP6/PPARGC1A/SHH/WNT5A/PTGS2/B2M/HMOX1/MAPK1/EGFR/SOD1/CREB1/MAPK8/CLDN1/PKD2/SLC40A1/GSN/CALR/CHUK/PRKAA2/CYP1A2/CDH1/FOS/HSPA5/MAPK3/AKT1/JUN/MMP9	33	BP
GO:1903426	regulation of reactive oxygen species biosynthetic process	27/415	101/17910	1.67677368687989e-21	2.68458453826499e-20	1.02261132088004e-20	EDN1/ASS1/AGT/TNF/JAK2/PTGS2/INS/MMP8/IL10/HBB/IL1B/AGTR2/PKD2/SMAD3/CD36/RHOA/MTOR/STAT3/PTX3/HSP90AA1/CD34/IFNG/ICAM1/CAV1/TLR4/INSR/AKT1	27	BP
GO:0030100	regulation of endocytosis	40/415	262/17910	1.68692065204215e-21	2.69521522057047e-20	1.02666075792302e-20	APOE/C3/TF/TFR2/TNF/EGF/SFTPD/WNT5A/B2M/VEGFA/TGFB1/PCSK9/SLC11A1/PTPRC/CD14/ANXA2/SOD1/LGALS3/IL4/SRC/IL1B/TLR2/HMGB1/PTEN/APOC3/CD36/TSC2/PPARG/SELE/CALR/ATG5/NR1H2/VTN/PTX3/SCARB1/CCL2/CAV1/SERPINE1/APOA1/ADIPOQ	40	BP
GO:0044057	regulation of system process	59/415	594/17910	1.76437538470127e-21	2.81311718494383e-20	1.07157194689981e-20	EDN1/IGF1/FGFR1/LEP/GNAS/PTK2/AGT/GAA/BMP6/PPARGC1A/JAK2/TNFRSF1A/PTGS2/AGER/ACE2/FOXO1/IGFBP5/SLC22A5/IL10/MDM2/EGFR/SOD1/GPR35/SRC/IL1B/REN/HAMP/SREBF1/AGTR2/HGF/TYMP/TGFB2/PTEN/DSP/NOS1/PTPN11/SMAD3/RHOA/MTOR/SMAD7/PDGFB/AGTR1/ADRB2/SMAD4/ADA/ACE/PPARA/PIK3CG/IL2/ICAM1/CAV1/TNFRSF1B/NOS3/AKT1/APOA1/CCL3/NOTCH1/PRKCA/ADIPOQ	59	BP
GO:0001655	urogenital system development	44/415	324/17910	1.79869789357019e-21	2.86190337724367e-20	1.09015557197749e-20	FGFR1/BCL2/ASS1/AGT/PKHD1/RARB/BMP6/PDGFRB/SHH/WNT5A/BMP7/CTNNB1/ESR1/VEGFA/TGFB1/MYC/PCSK9/STAT1/SMAD2/PDGFA/UMOD/CAT/REN/AGTR2/TGFB2/PTEN/PKD1/RXRA/PKD2/SMAD3/CXCR2/SMAD7/PDGFB/AGTR1/SMAD4/ACE/CD34/PECAM1/RBP4/FGF2/ACTA2/BAX/MMP9/ADIPOQ	44	BP
GO:0090132	epithelium migration	46/415	357/17910	1.887518011623e-21	2.99701981804189e-20	1.14162409532918e-20	EDN1/HSPB1/FGFR1/MET/APOE/PTK2/AGT/NFE2L2/ITGB1/WNT5A/PTGS2/VEGFA/TGFB1/HMOX1/APOH/IL4/SRC/SIRT1/AGTR2/HMGB1/TGFB2/PTEN/PTPN11/PPARG/RHOA/MTOR/PDGFB/CALR/SCARB1/PECAM1/FGF7/SP1/PIK3CA/IFNG/FGF2/GLUL/HIF1A/NOS3/TGFBR2/AKT1/SPARC/APOA1/JUN/NOTCH1/PRKCA/MMP9	46	BP
GO:0007267	cell-cell signaling	98/415	1510/17910	1.9832138054912e-21	3.14247383406182e-20	1.19703040544135e-20	EDN1/NOS2/FGFR1/LEP/COL1A1/FOXP3/GNAS/APOE/C3/GCK/TFR2/AGT/HSPA8/BMP6/TNF/EGF/ITGB1/SHH/JAK2/SPP1/XIAP/WNT5A/PTGS2/AGER/CTNNB1/CCND1/ESR1/PSMB8/VCP/FOXO1/HMGCR/INS/SMAD2/TUBB2B/MAPK1/PLAT/EGFR/CREB1/PDGFA/SCT/TERT/SRC/CXCL10/CCL5/NFKB1/IL1B/REN/CPT1A/SREBF1/TLR2/AGTR2/HGF/PTEN/AXIN1/PKD1/PKD2/PTPN11/SMAD3/IFNA2/TMEM237/CDH2/KRAS/RHOA/IL17A/MTOR/MAPK14/RAF1/PDGFB/STAT3/AGTR1/ADRB2/SMAD4/S100A8/CCL…	98	BP
GO:0042119	neutrophil activation	54/415	499/17910	1.99941815527269e-21	3.16163138338903e-20	1.20432789469642e-20	ELANE/C3/ALAD/HSPA8/GSTP1/GAA/HP/B2M/VCP/SLC11A1/CR1/PTPRC/CD14/ANXA2/CXCR1/MMP8/MAPK1/LGALS3/HBB/CCL5/CAT/IDH1/NFKB1/TLR2/HMGB1/DNASE1/PLAU/DSP/ALOX5/CD36/CXCR2/RHOA/SERPINA1/CXCL8/MAPK14/GSN/MPO/ARG1/SLPI/CAMP/PTX3/S100A8/HSP90AA1/PECAM1/TTR/PYGL/RNASE3/TNFRSF1B/LTF/CXCL1/MIF/LCN2/S100A9/MMP9	54	BP
GO:0060537	muscle tissue development	48/415	392/17910	2.16521565077505e-21	3.41677254131546e-20	1.3015162055129e-20	EDN1/IGF1/EP300/FGFR1/BCL2/ACTC1/AGT/RARB/PPARGC1A/PDGFRB/ITGB1/SHH/WNT5A/BMP7/CTNNB1/VEGFA/TGFB1/IGFBP5/HMGCR/MAPK1/CREB1/HAMP/AGTR2/TWIST1/TGFB2/PTEN/DSP/RXRA/PKD2/SMAD3/RHOA/MTOR/MAPK14/SMAD7/ELN/CALR/ATG5/NOX4/SMAD4/COL3A1/ENG/PPARA/RBP4/FOS/FGF2/CAV1/TGFBR2/NOTCH1	48	BP
GO:0071241	cellular response to inorganic substance	35/415	194/17910	2.19122648378517e-21	3.4507326901412e-20	1.3144522975424e-20	EDN1/TF/ALAD/TFR2/CYP1A1/NFE2L2/BMP6/PPARGC1A/SHH/WNT5A/PTGS2/B2M/FOXO1/HMOX1/MMP3/MAPK1/EGFR/SOD1/CREB1/MAPK8/CLDN1/PKD2/SLC40A1/GSN/CALR/CHUK/PRKAA2/CYP1A2/CDH1/FOS/HSPA5/MAPK3/AKT1/JUN/MMP9	35	BP
GO:0010605	negative regulation of macromolecule metabolic process	151/415	3087/17910	2.66139500694731e-21	4.18258090560124e-20	1.59322775036497e-20	XDH/EDN1/HSPB1/IGF1/EP300/NOS2/SEMA4D/FGFR1/LEP/BRCA1/ELANE/FOXP3/BIRC5/APOE/C3/ALAD/EZR/HSPA8/GSTP1/NR1I3/BMP6/PPARGC1A/SNAI1/TNF/CREBBP/LDLR/SHH/SFTPD/F2/XIAP/WNT5A/PTGS2/BMP7/CTNNB1/CCND1/NOTCH2/ESR1/TYMS/PSMB8/VEGFA/TGFB1/MYC/PCSK9/NKX2-1/SLC11A1/TNFAIP3/FOXO1/STAT1/GCLC/IGFBP5/MMP12/CR1/PTPRC/HMGCR/ANXA2/EIF2AK2/INS/SMAD2/BRCA2/MMP8/IL10/PLAT/MDM2/EGFR/IKBKB/CREB1/LGALS3/IL4/BBS4/TERT/SRC/TP…	151	BP
GO:0097529	myeloid leukocyte migration	33/415	170/17910	2.88891515621969e-21	4.53088019909149e-20	1.72590183661589e-20	EDN1/SFTPD/AGER/CCR7/CCL11/MMP14/LGALS3/CXCL10/CCL5/UMOD/HMGB1/TGFB2/CSF1/LBP/CXCR2/CALCA/CXCL8/IL17A/MAPK14/PDGFB/S100A8/CCL2/IL6/PECAM1/LYN/PIK3CG/CXCL12/MAPK3/CD81/SERPINE1/MIF/CCL3/S100A9	33	BP
GO:0071375	cellular response to peptide hormone stimulus	42/415	297/17910	3.22333306960583e-21	5.04507426474965e-20	1.92176852107917e-20	EDN1/LEP/PTK2/GCK/ASS1/AGT/GSTP1/NFE2L2/JAK2/TGFB1/PCSK9/FOXO1/STAT1/GCLC/INS/BGLAP/MDM2/CREB1/SRC/LPL/NFKB1/SIRT1/IL1B/SREBF1/AGTR2/PTEN/PTPN11/TSC2/PPARG/STAT3/ARG1/AGTR1/LYN/IGF2/SP1/PIK3CA/CAV1/RELA/NR1H4/INSR/AKT1/ADIPOQ	42	BP
GO:0070997	neuron death	45/415	347/17910	4.07677773865134e-21	6.36789368323893e-20	2.42565658775981e-20	SOD2/APOE/BCL2/PPARGC1A/TNF/JAK2/WNT5A/CTNNB1/PCSK9/IL13/GCLC/HMOX1/IL10/SOD1/CREB1/TERT/CCL5/TP53/SIRT1/EPO/TGFB2/CSF1/CASP8/KRAS/RHOA/MTOR/CSF3/STAT3/CCL2/CASP3/CD34/PPARA/TGFB3/PIK3CA/DDIT3/FOS/HSPA5/TNFRSF1B/HIF1A/TLR4/AKT1/CEBPB/CCL3/JUN/BAX	45	BP
GO:0033273	response to vitamin	26/415	95/17910	4.89420544471487e-21	7.62920260499671e-20	2.90611409026413e-20	LEP/COL1A1/ALAD/CYP1A1/GSTP1/SPP1/PTGS2/BMP7/CCND1/TYMS/TGFB1/BGLAP/MDM2/EGFR/CXCL10/CAT/HAMP/EPO/MTHFR/PPARG/GSN/ARG1/ADA/VDR/RELA/SPARC	26	BP
GO:0045765	regulation of angiogenesis	47/415	383/17910	5.31553527079339e-21	8.26920820972616e-20	3.14990487706721e-20	HSPB1/CXCR4/LEP/BRCA1/C3/AGT/NFE2L2/IL1A/ITGB1/WNT5A/PTGS2/CTNNB1/VEGFA/TNFAIP3/STAT1/CCL11/HMOX1/IL10/APOH/TERT/CXCL10/SIRT1/IL1B/TWIST1/HGF/TGFB2/CXCR2/PPARG/RHOA/CXCL8/STAT3/AGTR1/IL6/CD34/ENG/SP1/FGF2/GLUL/HIF1A/NOS3/SERPINE1/TGFBR2/JAK1/SPARC/F3/NOTCH1/PRKCA	47	BP
GO:0002685	regulation of leukocyte migration	34/415	186/17910	5.37444460973164e-21	8.34396097490659e-20	3.17837968307574e-20	EDN1/ELANE/AIRE/TNF/WNT5A/AGER/VEGFA/TGFB1/CCR7/HMOX1/MMP14/LGALS3/CXCL10/CCL5/HMGB1/CSF1/LBP/CXCR2/RHOA/CXCL8/MAPK14/CALR/CCL2/ADA/IL6/LYN/CXCL12/ICAM1/MAPK3/CD81/SERPINE1/AKT1/MIF/CCL3	34	BP
GO:0032602	chemokine production	25/415	86/17910	5.46006772417738e-21	8.45980251215789e-20	3.22250601463015e-20	ELANE/AIRE/GSTP1/TNF/WNT5A/AGER/EIF2AK2/HMOX1/IL10/TLR7/LPL/IL1B/TLR2/HAVCR2/TWIST1/LBP/S100A8/IL6/HIF1A/NR1H4/TLR4/TLR9/MIF/S100A9/ADIPOQ	25	BP
GO:0071706	tumor necrosis factor superfamily cytokine production	32/415	161/17910	5.52722216091256e-21	8.54662018241711e-20	3.25557658148847e-20	HSPB1/IGF1/LEP/FOXP3/GSTP1/JAK2/WNT5A/AGER/TNFAIP3/PTPRC/CD14/MMP8/IL10/LPL/NOD2/TLR2/HAVCR2/TWIST1/HMGB1/PTPN11/CD36/LBP/CD34/IFNG/LTF/NR1H4/TLR4/TLR9/MIF/CCL3/CD274/ADIPOQ	32	BP
GO:0007162	negative regulation of cell adhesion	40/415	271/17910	6.02458279744089e-21	9.29697164625166e-20	3.54140028739867e-20	SEMA4D/COL1A1/FOXP3/PTK2/ASS1/SHH/JAK2/SFTPD/TGFB1/MMP12/PTPRC/IL10/MMP14/LGALS3/SRC/PLG/HAVCR2/HMGB1/PTEN/IRF1/PTPN11/IFNA2/RHOA/SMAD7/ARG1/CASP3/PPARA/IL2/CDH1/CXCL12/SH2B3/SERPINE1/AKT1/APOA1/IFNB1/CDKN2A/CEBPB/NOTCH1/CD274/ADIPOQ	40	BP
GO:0045471	response to ethanol	29/415	127/17910	6.5725943856118e-21	1.01223222151156e-19	3.85579263503563e-20	UGT1A1/LEP/ALAD/ACTC1/GSTP1/CCND1/TYMS/IL13/CD14/HMGCR/BGLAP/SOD1/CAT/CLDN1/HAMP/PTEN/CASP8/RHOA/GSN/CSF3/STAT3/CYP2E1/S100A8/RBP4/IL2/ICAM1/VCAM1/SPARC/ADIPOQ	29	BP
GO:0048511	rhythmic process	41/415	287/17910	6.66131599754138e-21	1.02384426882211e-19	3.90002521877107e-20	EP300/MMP7/NOS2/LEP/ASS1/PPARGC1A/CREBBP/ESR1/TYMS/NKX2-1/EGFR/CREB1/MAPK8/SRC/TP53/SIRT1/CPT1A/SREBF1/TWIST1/TGFB2/PTEN/EZH2/PPARG/AFP/MTOR/PCNA/PTX3/ADA/CASP3/PRKAA2/PPARA/TGFB3/SP1/HSPA5/TOP2A/HNF4A/NOS3/SERPINE1/JUN/CSF2/ADIPOQ	41	BP
GO:0001894	tissue homeostasis	36/415	214/17910	6.70234354902291e-21	1.02809401545391e-19	3.91621334380349e-20	HSPB1/GNAS/BCL2/TF/SFTPD/B2M/CTNNB1/VEGFA/TNFAIP3/SLC22A5/FH/BGLAP/EGFR/SOD1/BBS4/SRC/ALB/NOD2/PTPN11/CSF1/TNFRSF11B/KRAS/CALCA/NOX4/ADRB2/TFRC/IL6/CD34/RBP4/LTF/NOS3/ACTB/TLR4/TLR9/BAX/PRKCA	36	BP
GO:0006508	proteolysis	102/415	1645/17910	7.08191536950763e-21	1.08415377718458e-19	4.12975605841911e-20	MMP2/XDH/EP300/MMP7/BRCA1/ELANE/BIRC5/APOE/C3/HSPD1/PTK2/ALAD/FN1/NFE2L2/HP/TNF/EGF/SHH/JAK2/F2/XIAP/PTGS2/AGER/CTNNB1/ESR1/ACE2/PSMB8/VEGFA/TGFB1/MYC/PCSK9/VCP/TNFAIP3/MMP1/GCLC/MMP12/CR1/GGT1/INS/SMAD2/MMP3/MMP8/IL10/MMP14/PLAT/MDM2/APOH/BMP1/SRC/PLG/TP53/NFKB1/SIRT1/IL1B/REN/NFKBIA/HGF/HMGB1/PLAU/PTEN/AXIN1/NLRP3/PKD1/SMAD3/FAS/CASP8/PPARG/RHOA/MAPK14/RAF1/GSN/SMAD7/STAT3/SLPI/VTN/ADRB2/SMAD4/…	102	BP
GO:0001503	ossification	47/415	388/17910	9.17402546021697e-21	1.40163788591983e-19	5.33911579049145e-20	MMP2/IGF1/SEMA4D/LEP/COL1A1/GNAS/PTK2/BCL2/BMP6/SNAI1/TNF/SHH/WNT5A/PTGS2/BMP7/CTNNB1/TGFB1/IGFBP5/BGLAP/MAPK1/MMP14/EGFR/BMP1/CAT/IGFBP3/TWIST1/COL1A2/HGF/TGFB2/FASN/SMAD3/CSF1/RHOA/MAPK14/ADRB2/IL6/TGFB3/IGF2/MAPK3/LTF/HIF1A/AKT1/SPARC/CEBPB/CCL3/NOTCH1/MMP9	47	BP
GO:0042803	protein homodimerization activity	71/412	809/16967	1.66381210525237e-21	1.64263631482189e-19	1.03968354519598e-19	XDH/HSPB1/NOS2/FGFR1/UGT1A1/FOXP3/APOE/BCL2/GPD1/IRF3/HPS4/PTGS2/CBS/TYMS/VEGFA/TGFB1/SLC11A1/STAT1/PTPRC/HMGCR/ABCD3/HMOX1/SMAD2/GSTM1/IKBKB/SOD1/PDGFA/TERT/CCL5/TP53/LPL/CAT/CPOX/IDH1/NFKB1/AGXT/TWIST1/TYMP/TGFB2/AXIN1/FASN/PKD2/SMAD3/CSF1/TSC2/PDGFB/CHUK/STAT3/UGT1A6/ADRB2/SMAD4/SCARB1/TFRC/HSP90AA1/ENG/PECAM1/UGT1A9/PYGL/SP1/DDIT3/TOP2A/HNF4A/RELA/GSTM3/TLR9/AKT1/LCN2/CEBPB/JUN/BAX/ADIPOQ	71	MF
GO:0072001	renal system development	41/415	291/17910	1.12880827073189e-20	1.72120864297115e-19	6.55642397849913e-20	FGFR1/BCL2/ASS1/AGT/PKHD1/RARB/BMP6/PDGFRB/SHH/WNT5A/BMP7/CTNNB1/VEGFA/TGFB1/MYC/PCSK9/STAT1/SMAD2/PDGFA/UMOD/CAT/REN/AGTR2/TGFB2/PKD1/PKD2/SMAD3/CXCR2/SMAD7/PDGFB/AGTR1/SMAD4/ACE/CD34/PECAM1/RBP4/FGF2/ACTA2/BAX/MMP9/ADIPOQ	41	BP
GO:0098542	defense response to other organism	52/415	481/17910	1.23488633135102e-20	1.87922801117476e-19	7.15835099007228e-20	NOS2/ELANE/BCL2/IRF3/CRP/HP/TNF/TNFRSF1A/SFTPD/F2/TGFB1/SLC11A1/TNFAIP3/STAT1/MMP12/PTPRC/EIF2AK2/IL10/TLR7/CXCL10/IL1B/HAMP/NOD2/TLR2/HAVCR2/IL12RB1/IRF1/NLRP3/IFNA2/CD36/LBP/IL17A/MPO/ARG1/SLPI/CAMP/S100A8/IL6/RNASE3/IFNG/MAPK3/LTF/RELA/NR1H4/TLR4/SERPINE1/TLR9/LCN2/LTA/IFNB1/CEBPB/S100A9	52	BP
GO:0072503	cellular divalent inorganic cation homeostasis	47/415	392/17910	1.41055058331151e-20	2.14230854402153e-19	8.16047674680528e-20	EDN1/ELANE/APOE/BCL2/EDNRA/AGT/PKHD1/ATP7B/JAK2/F2/WNT5A/ESR1/TGFB1/IL13/SLC11A1/CCR7/PTPRC/ANXA2/CCL11/GPR35/CXCL10/CCL5/EPO/HMGB1/PKD1/TGM2/NOS1/PKD2/SMAD3/CD36/CALCA/CALR/ATG5/AGTR1/S100A8/VDR/LYN/PIK3CG/IL2/DDIT3/FGF2/CXCL12/CAV1/HSP90B1/CCL3/BAX/S100A9	47	BP
GO:0001667	ameboidal-type cell migration	50/415	446/17910	1.48626694679478e-20	2.25285236412581e-19	8.5815600104563e-20	EDN1/HSPB1/FGFR1/MET/APOE/PTK2/AGT/FN1/NFE2L2/ITGB1/SHH/WNT5A/PTGS2/BMP7/VEGFA/TGFB1/HMOX1/APOH/IL4/SRC/SIRT1/AGTR2/TWIST1/HMGB1/TGFB2/PTEN/PTPN11/PPARG/RHOA/MTOR/PDGFB/CALR/SCARB1/PECAM1/FGF7/SP1/PIK3CA/IFNG/FGF2/GLUL/HIF1A/NOS3/TGFBR2/AKT1/SPARC/APOA1/JUN/NOTCH1/PRKCA/MMP9	50	BP
GO:0010632	regulation of epithelial cell migration	41/415	294/17910	1.66665046403802e-20	2.52130094805751e-19	9.60413373495591e-20	EDN1/HSPB1/FGFR1/MET/APOE/PTK2/AGT/NFE2L2/WNT5A/PTGS2/VEGFA/TGFB1/HMOX1/APOH/IL4/SRC/SIRT1/AGTR2/HMGB1/TGFB2/PTEN/PPARG/RHOA/MTOR/PDGFB/CALR/SCARB1/FGF7/SP1/IFNG/FGF2/GLUL/HIF1A/NOS3/TGFBR2/AKT1/SPARC/JUN/NOTCH1/PRKCA/MMP9	41	BP
GO:0072507	divalent inorganic cation homeostasis	48/415	412/17910	1.81670669298293e-20	2.74290588125223e-19	1.04482707335033e-19	EDN1/ELANE/APOE/BCL2/EDNRA/AGT/PKHD1/ATP7B/JAK2/F2/WNT5A/ESR1/TGFB1/IL13/SLC11A1/CCR7/PTPRC/ANXA2/CCL11/EGFR/GPR35/CXCL10/CCL5/EPO/HMGB1/PKD1/TGM2/NOS1/PKD2/SMAD3/CD36/CALCA/CALR/ATG5/AGTR1/S100A8/VDR/LYN/PIK3CG/IL2/DDIT3/FGF2/CXCL12/CAV1/HSP90B1/CCL3/BAX/S100A9	48	BP
GO:1903555	regulation of tumor necrosis factor superfamily cytokine production	31/415	155/17910	1.89934199810158e-20	2.86204769713934e-19	1.09021054627874e-19	HSPB1/IGF1/LEP/FOXP3/GSTP1/JAK2/WNT5A/AGER/TNFAIP3/PTPRC/CD14/MMP8/IL10/LPL/NOD2/TLR2/HAVCR2/TWIST1/PTPN11/CD36/LBP/CD34/IFNG/LTF/NR1H4/TLR4/TLR9/MIF/CCL3/CD274/ADIPOQ	31	BP
GO:0002764	immune response-regulating signaling pathway	58/415	603/17910	1.93009254502756e-20	2.90269299579976e-19	1.10569314403577e-19	EP300/FOXP3/HSPD1/PTK2/BCL2/IRF3/EZR/CREBBP/SFTPD/XIAP/ESR1/PSMB8/TNFAIP3/CCR7/CR1/PTPRC/CD14/MAPK1/IKBKB/TLR7/LGALS3/MAPK8/SRC/NFKB1/NFKBIA/NOD2/TLR2/HAVCR2/HMGB1/IRF1/CD36/LBP/CASP8/KRAS/RAF1/CHUK/S100A8/ADA/HSP90AA1/RBCK1/LYN/PIK3CA/FOS/CAV1/MAPK3/LTF/HSP90B1/CD81/RELA/NR1H4/ACTB/TLR4/TLR9/MUC5AC/JUN/KCNN4/BAX/S100A9	58	BP
GO:0014068	positive regulation of phosphatidylinositol 3-kinase signaling	24/415	81/17910	2.03500465974815e-20	3.05449429886026e-19	1.16351726125814e-19	IGF1/SEMA4D/FGFR1/LEP/PTK2/AGT/PDGFRB/TNF/JAK2/F2/INS/PDGFA/SRC/CCL5/CAT/SIRT1/EPO/HGF/TGFB2/PDGFB/CSF3/LYN/PIK3CG/PIK3CA	24	BP
GO:0050715	positive regulation of cytokine secretion	29/415	132/17910	2.08932327563125e-20	3.12991215852361e-19	1.19224541490315e-19	IRF3/TNF/IL1A/WNT5A/AGER/MMP12/CD14/INS/MMP8/IL10/SRC/LPL/IL1B/NOD2/TLR2/HAVCR2/AGTR2/TWIST1/HMGB1/NLRP3/IL17A/MAPK14/CHUK/CD34/MAPK3/TLR4/MIF/CCL3/CD274	29	BP
GO:0032269	negative regulation of cellular protein metabolic process	78/415	1049/17910	2.0947405522044e-20	3.13192240149626e-19	1.19301115619095e-19	XDH/EDN1/HSPB1/SEMA4D/BRCA1/FOXP3/BIRC5/APOE/C3/ALAD/EZR/GSTP1/PPARGC1A/TNF/SHH/F2/XIAP/PTGS2/BMP7/CTNNB1/TYMS/VEGFA/TGFB1/MYC/TNFAIP3/FOXO1/GCLC/IGFBP5/CR1/PTPRC/HMGCR/ANXA2/EIF2AK2/INS/IL10/PLAT/MDM2/IKBKB/LGALS3/SRC/TP53/CDKN1A/NFKB1/SIRT1/IL1B/IGFBP3/TWIST1/HGF/PTEN/TSC2/MTOR/RAF1/SMAD7/CALR/ATG5/STAT3/SLPI/VTN/SMAD4/CASP3/ENG/PRKAA2/LYN/FABP1/IL2/CAV1/LTF/SH2B3/RELA/TLR4/SERPINE1/AKT1/MIF/CD…	78	BP
GO:0002283	neutrophil activation involved in immune response	52/415	488/17910	2.36543667988178e-20	3.52978269609543e-19	1.34456400751175e-19	ELANE/C3/ALAD/HSPA8/GSTP1/GAA/HP/B2M/VCP/SLC11A1/CR1/PTPRC/CD14/ANXA2/CXCR1/MMP8/MAPK1/LGALS3/HBB/CAT/IDH1/NFKB1/TLR2/HMGB1/DNASE1/PLAU/DSP/ALOX5/CD36/CXCR2/RHOA/SERPINA1/MAPK14/GSN/MPO/ARG1/SLPI/CAMP/PTX3/S100A8/HSP90AA1/PECAM1/TTR/PYGL/RNASE3/TNFRSF1B/LTF/CXCL1/MIF/LCN2/S100A9/MMP9	52	BP
GO:0046890	regulation of lipid biosynthetic process	34/415	195/17910	2.59702014138364e-20	3.86784879583978e-19	1.47334006796979e-19	LEP/BRCA1/APOE/C3/BMP6/PPARGC1A/SNAI1/TNF/LDLR/TNFRSF1A/PTGS2/HMGCR/INS/SOD1/CREB1/PDGFA/IDH1/NFKB1/SIRT1/IL1B/SREBF1/FASN/APOC3/MTOR/PDGFB/NR1H2/SCARB1/VDR/PRKAA2/SP1/IFNG/NR1H4/AKT1/ADIPOQ	34	BP
GO:0032368	regulation of lipid transport	28/415	122/17910	2.71684084780663e-20	4.03847619253268e-19	1.53833541642069e-19	EDN1/LEP/APOE/AGT/BMP6/EGF/SHH/SPP1/PCSK9/ANXA2/CETP/NFKB1/SIRT1/IL1B/REN/NFKBIA/AGTR2/PTPN11/APOC3/PPARG/NR1H2/AGTR1/PPARA/ABCB4/AKT1/MIF/APOA1/ADIPOQ	28	BP
GO:0046686	response to cadmium ion	21/415	57/17910	2.76847524951413e-20	4.09937038391446e-19	1.56153121770587e-19	ALAD/B2M/GCLC/HMOX1/MAPK1/EGFR/SOD1/MAPK8/TERT/CAT/GSN/PCNA/CHUK/ARG1/CYP1A2/FOS/MAPK3/AKT1/SPARC/JUN/MMP9	21	BP
GO:1903428	positive regulation of reactive oxygen species biosynthetic process	21/415	57/17910	2.76847524951413e-20	4.09937038391446e-19	1.56153121770587e-19	EDN1/ASS1/AGT/TNF/JAK2/PTGS2/MMP8/HBB/IL1B/AGTR2/PKD2/SMAD3/CD36/MTOR/PTX3/HSP90AA1/IFNG/ICAM1/TLR4/INSR/AKT1	21	BP
GO:0042133	neurotransmitter metabolic process	30/415	145/17910	2.8511266742273e-20	4.21363624835323e-19	1.60505734433727e-19	EDN1/NOS2/ASS1/AGT/TNF/JAK2/PTGS2/MMP8/IL10/HBB/IL1B/AGXT/TLR2/AGTR2/NOS1/PKD2/SMAD3/CD36/MTOR/PTX3/HSP90AA1/CD34/IFNG/ICAM1/CAV1/NOS3/TLR4/INSR/AKT1/PAH	30	BP
GO:0001936	regulation of endothelial cell proliferation	32/415	170/17910	3.14320063206601e-20	4.63637175766359e-19	1.76608565668766e-19	XDH/FGFR1/LEP/APOE/BMP6/TNF/WNT5A/VEGFA/STAT1/CCL11/HMOX1/IL10/APOH/SIRT1/HMGB1/PPARG/MTOR/PDGFB/STAT3/ARG1/AGTR1/CCL2/SP1/FGF2/CXCL12/CAV1/HIF1A/AKT1/SPARC/F3/JUN/PRKCA	32	BP
GO:0030193	regulation of blood coagulation	23/415	74/17910	3.77103848764684e-20	5.55180666236896e-19	2.11479290868035e-19	EDN1/APOE/NFE2L2/F2/PLAT/APOH/PDGFA/PLG/PLAU/CD36/THBD/PDGFB/VTN/CD34/LYN/CAV1/SH2B3/NOS3/TLR4/SERPINE1/SERPINC1/F3/PRKCA	23	BP
GO:0045862	positive regulation of proteolysis	43/415	333/17910	3.82984931101372e-20	5.62760840442456e-19	2.14366729071735e-19	XDH/APOE/C3/HSPD1/PTK2/FN1/NFE2L2/TNF/EGF/JAK2/AGER/MYC/VCP/GCLC/CR1/MMP14/MDM2/SRC/SIRT1/IL1B/HMGB1/PTEN/AXIN1/NLRP3/SMAD3/FAS/CASP8/PPARG/RHOA/MAPK14/GSN/SMAD7/STAT3/S100A8/LYN/IFNG/CAV1/TNFRSF1B/MAPK3/AKT1/F3/BAX/S100A9	43	BP
GO:0030198	extracellular matrix organization	43/415	334/17910	4.30522314082997e-20	6.31405340406074e-19	2.40514776107837e-19	MMP2/MMP7/ELANE/COL1A1/PTK2/AGT/FN1/TNF/ITGB1/TNFRSF1A/SPP1/TGFB1/MMP1/MMP12/MMP3/MMP8/MMP14/PDGFA/BMP1/PLG/COL1A2/TGFB2/SMAD3/TNFRSF11B/PDGFB/ELN/VTN/PTX3/IL6/COL3A1/ENG/PECAM1/TTR/CDH1/FGF2/ICAM1/TNFRSF1B/SERPINE1/VCAM1/SPARC/NOTCH1/PRSS1/MMP9	43	BP
GO:0010001	glial cell differentiation	35/415	212/17910	4.4972146536327e-20	6.57972199638556e-19	2.50634617976896e-19	CXCR4/GSTP1/TNF/LDLR/SHH/F2/AGER/CTNNB1/TGFB1/NKX2-1/MAPK1/EGFR/SOD1/IL1B/TLR2/PTEN/PTPN11/CDH2/KRAS/PPARG/RHOA/MTOR/GSN/VIM/STAT3/VTN/S100A8/IL6/LYN/TNFRSF1B/MAPK3/RELA/TLR4/AKT1/NOTCH1	35	BP
GO:0030162	regulation of proteolysis	65/415	762/17910	4.50349221873625e-20	6.57972199638556e-19	2.50634617976896e-19	XDH/BIRC5/APOE/C3/HSPD1/PTK2/ALAD/FN1/NFE2L2/TNF/EGF/SHH/JAK2/F2/XIAP/PTGS2/AGER/PSMB8/VEGFA/MYC/VCP/GCLC/CR1/INS/IL10/MMP14/PLAT/MDM2/SRC/TP53/SIRT1/IL1B/HGF/HMGB1/PTEN/AXIN1/NLRP3/PKD1/SMAD3/FAS/CASP8/PPARG/RHOA/MAPK14/RAF1/GSN/SMAD7/STAT3/SLPI/VTN/S100A8/LYN/FABP1/IFNG/CAV1/TNFRSF1B/MAPK3/LTF/CD81/SERPINE1/AKT1/F3/BAX/S100A9/MMP9	65	BP
GO:0002703	regulation of leukocyte mediated immunity	33/415	185/17910	4.57382220305262e-20	6.66979575530538e-19	2.54065705516615e-19	LEP/FOXP3/C3/HSPD1/TNF/B2M/AGER/TGFB1/IL13/CR1/PTPRC/HMOX1/IL10/IL4/IL1B/NOD2/HAVCR2/HMGB1/DNASE1/IL12RB1/NLRP3/IFNA2/SMAD7/ARG1/TFRC/IL6/LYN/IL2/TNFRSF1B/CD81/TLR4/LTA/IFNB1	33	BP
GO:0048872	homeostasis of number of cells	37/415	241/17910	4.78979329237894e-20	6.95943286309887e-19	2.65098555522076e-19	MPL/FOXP3/BCL2/JAK2/B2M/VEGFA/TGFB1/TNFAIP3/STAT1/CCR7/FH/HMOX1/SOD1/ALAS2/EPO/HMGB1/PTPN11/EZH2/CSF1/SLC40A1/CXCR2/CDH2/KRAS/MAPK14/STAT3/ADA/IL6/CASP3/SLC11A2/LYN/IL2/SH2B3/HIF1A/NOS3/AKT1/MIF/BAX	37	BP
GO:0070372	regulation of ERK1 and ERK2 cascade	39/415	271/17910	4.79055300530814e-20	6.95943286309887e-19	2.65098555522076e-19	APOE/EZR/PKHD1/GSTP1/FN1/PDGFRB/TNF/THPO/AGER/NOTCH2/TGFB1/CCR7/PTPRC/HMGCR/EGFR/PDGFA/SRC/IL1B/NOD2/HAVCR2/EPO/HMGB1/PTEN/PTPN11/CD36/PDGFB/NOX4/SMAD4/LYN/FGF2/ICAM1/MAPK3/TLR4/MIF/CCL3/JUN/NOTCH1/PRKCA/ADIPOQ	39	BP
GO:0006357	regulation of transcription by RNA polymerase II	127/415	2420/17910	5.31028753609062e-20	7.6999169273314e-19	2.93305057355869e-19	EDN1/IGF1/EP300/SOD2/SEMA4D/FGFR1/MET/LEP/BRCA1/ELANE/FOXP3/APOE/AIRE/HSPD1/TFR2/IRF3/EZR/TCF4/NFE2L2/NR1I3/BMP6/PPARGC1A/SNAI1/TNF/IL1A/CREBBP/SHH/TNFRSF1A/XIAP/WNT5A/BMP7/CTNNB1/CCND1/ESR1/PSMB8/VEGFA/TGFB1/MYC/NKX2-1/SLC11A1/FOXO1/STAT1/MMP12/HMOX1/SMAD2/IL10/MDM2/EGFR/IKBKB/CREB1/IL4/TERT/CXCL10/TP53/CDKN1A/NFKB1/SIRT1/NFKBIA/HAMP/SREBF1/NOD2/TLR2/TWIST1/EPO/HGF/HMGB1/TGFB2/IRF1/NLRP3/PKD1/RX…	127	BP
GO:1900046	regulation of hemostasis	23/415	75/17910	5.32468160496067e-20	7.7062482361813e-19	2.93546229426021e-19	EDN1/APOE/NFE2L2/F2/PLAT/APOH/PDGFA/PLG/PLAU/CD36/THBD/PDGFB/VTN/CD34/LYN/CAV1/SH2B3/NOS3/TLR4/SERPINE1/SERPINC1/F3/PRKCA	23	BP
GO:0001501	skeletal system development	51/415	479/17910	5.85880107230765e-20	8.46332448133163e-19	3.22384760231254e-19	MMP2/EDN1/IGF1/EP300/SEMA4D/FGFR1/LEP/COL1A1/GNAS/RARB/BMP6/SNAI1/SHH/THPO/WNT5A/BMP7/CTNNB1/NOTCH2/TYMS/TGFB1/PTPRC/ANXA2/SMAD2/BGLAP/MMP14/BMP1/TP53/TWIST1/COL1A2/TGFB2/PKD1/PTPN11/SMAD3/TNFRSF11B/RHOA/MAPK14/VDR/COL3A1/ENG/TGFB3/RBP4/IGF2/FGF2/MAPK3/LTF/SH2B3/RELA/HIF1A/TGFBR2/SPARC/MMP9	51	BP
GO:0048699	generation of neurons	91/415	1398/17910	6.40787037791566e-20	9.23911516965888e-19	3.51936161172775e-19	CXCR4/EP300/SEMA4D/FGFR1/LEP/DGUOK/APOE/C3/PTK2/BCL2/EZR/AGT/RARB/TCF4/FN1/NFE2L2/BMP6/TNF/ITGB1/LDLR/SHH/JAK2/SPP1/F2/WNT5A/BMP7/B2M/AGER/CTNNB1/VEGFA/TGFB1/PCSK9/NKX2-1/TUBB2B/MAPK1/MDM2/EGFR/SOD1/CREB1/BBS4/TERT/SRC/TP53/IL1B/TLR2/NME1/TWIST1/EPO/HGF/HMGB1/TGFB2/PTEN/NOS1/PTPN11/EZH2/CSF1/CDH2/PPARG/RHOA/MTOR/VIM/CALR/STAT3/SMAD4/TUBB3/IL6/HSP90AA1/CASP3/COL3A1/SLC11A2/LYN/PIK3CA/IL2/CDH1/HSPA…	91	BP
GO:0007399	nervous system development	120/415	2216/17910	6.94017140557373e-20	9.98786839921988e-19	3.80457651860843e-19	CXCR4/EP300/SEMA4D/FGFR1/LEP/DGUOK/APOE/C3/PTK2/BCL2/EDNRA/EZR/AGT/RARB/GSTP1/TCF4/FN1/NFE2L2/BMP6/PPARGC1A/TNF/EGF/ITGB1/LDLR/SHH/JAK2/SPP1/F2/WNT5A/BMP7/B2M/AGER/CTNNB1/NOTCH2/VEGFA/TGFB1/PCSK9/NKX2-1/BRCA2/TUBB2B/MAPK1/MMP14/MDM2/EGFR/SOD1/CREB1/BBS4/SCT/TERT/SRC/TP53/CLDN1/IL1B/TLR2/NME1/AGTR2/TWIST1/EPO/HGF/TYMP/HMGB1/TGFB2/PTEN/PKD1/NOS1/PKD2/MTHFR/PTPN11/EZH2/CSF1/CXCR2/TSC2/CDH2/KRAS/PPAR…	120	BP
GO:0022612	gland morphogenesis	27/415	116/17910	8.80206386331589e-20	1.26437122971182e-18	4.81623996141298e-19	FGFR1/BCL2/TNF/SHH/WNT5A/BMP7/ESR1/TGFB1/TNFAIP3/IGFBP5/CCL11/EGFR/PDGFA/SRC/HGF/TGFB2/TGM2/RXRA/CSF1/ARG1/VDR/TGFB3/FGF7/CAV1/TGFBR2/CEBPB/BAX	27	BP
GO:0001822	kidney development	39/415	276/17910	9.29772223256432e-20	1.33307827159061e-18	5.07795866629249e-19	FGFR1/BCL2/ASS1/AGT/PKHD1/RARB/BMP6/PDGFRB/SHH/BMP7/CTNNB1/VEGFA/TGFB1/MYC/PCSK9/STAT1/SMAD2/PDGFA/UMOD/CAT/REN/AGTR2/TGFB2/PKD1/PKD2/SMAD3/CXCR2/SMAD7/PDGFB/AGTR1/SMAD4/ACE/CD34/PECAM1/FGF2/ACTA2/BAX/MMP9/ADIPOQ	39	BP
GO:0018105	peptidyl-serine phosphorylation	36/415	231/17910	9.37261953378788e-20	1.34131435972365e-18	5.1093315541437e-19	BCL2/TNF/WNT5A/PTGS2/VEGFA/TGFB1/MAPK1/EGFR/IKBKB/MAPK8/SRC/EPO/HGF/AXIN1/PKD1/NOS1/MTOR/MAPK14/RAF1/SMAD7/PDGFB/CSF3/IL6/HSP90AA1/PRKAA2/PIK3CA/IFNG/CAV1/MAPK3/TGFBR2/AKT1/MIF/TXN/IFNB1/BAX/PRKCA	36	BP
GO:2001236	regulation of extrinsic apoptotic signaling pathway	30/415	151/17910	9.72959598376345e-20	1.38981310660264e-18	5.29407286848878e-19	IGF1/FGFR1/BRCA1/BCL2/AGT/GSTP1/TNF/IL1A/TNFAIP3/GCLC/PTPRC/HMOX1/LGALS3/TERT/SRC/IL1B/AGTR2/HGF/PTEN/FAS/CASP8/RAF1/RBCK1/ICAM1/CAV1/RELA/NOS3/SERPINE1/AKT1/CSF2	30	BP
GO:0043312	neutrophil degranulation	51/415	485/17910	1.01211310034798e-19	1.44305921635885e-18	5.49689782651641e-19	ELANE/C3/ALAD/HSPA8/GSTP1/GAA/HP/B2M/VCP/SLC11A1/CR1/PTPRC/CD14/ANXA2/CXCR1/MMP8/MAPK1/LGALS3/HBB/CAT/IDH1/NFKB1/TLR2/HMGB1/PLAU/DSP/ALOX5/CD36/CXCR2/RHOA/SERPINA1/MAPK14/GSN/MPO/ARG1/SLPI/CAMP/PTX3/S100A8/HSP90AA1/PECAM1/TTR/PYGL/RNASE3/TNFRSF1B/LTF/CXCL1/MIF/LCN2/S100A9/MMP9	51	BP
GO:0002253	activation of immune response	59/415	647/17910	1.194914075405e-19	1.70053975360879e-18	6.47769209298502e-19	EP300/FOXP3/C3/HSPD1/PTK2/BCL2/IRF3/EZR/CREBBP/SFTPD/F2/XIAP/ESR1/PSMB8/TNFAIP3/CCR7/CR1/PTPRC/CD14/MAPK1/IKBKB/TLR7/LGALS3/SRC/NFKB1/IL1B/NFKBIA/NOD2/TLR2/HAVCR2/HMGB1/IRF1/CD36/LBP/CASP8/KRAS/RAF1/CHUK/VTN/S100A8/ADA/HSP90AA1/RBCK1/LYN/PIK3CA/CAV1/MAPK3/LTF/HSP90B1/CD81/RELA/NR1H4/ACTB/TLR4/TLR9/MUC5AC/KCNN4/BAX/S100A9	59	BP
GO:0009266	response to temperature stimulus	35/415	219/17910	1.338178575147e-19	1.90090616451103e-18	7.24092736157953e-19	CXCR4/IGF1/EP300/HSPD1/HSPA8/PPARGC1A/IL1A/CREBBP/ABCC2/PTGS2/VCP/FOXO1/GCLC/CD14/HMOX1/MAPK1/SOD1/CXCL10/CDKN1A/LPL/SIRT1/NFKBIA/NOS1/CASP8/PPARG/MTOR/ADRB2/HSP90AA1/CD34/LYN/FOS/CXCL12/MAPK3/NOS3/AKT1	35	BP
GO:0002757	immune response-activating signal transduction	55/415	567/17910	1.40054194029146e-19	1.98582376589296e-18	7.56439529219372e-19	EP300/FOXP3/HSPD1/PTK2/BCL2/IRF3/EZR/CREBBP/SFTPD/XIAP/ESR1/PSMB8/TNFAIP3/CCR7/CR1/PTPRC/CD14/MAPK1/IKBKB/TLR7/LGALS3/SRC/NFKB1/NFKBIA/NOD2/TLR2/HAVCR2/HMGB1/IRF1/CD36/LBP/CASP8/KRAS/RAF1/CHUK/S100A8/ADA/HSP90AA1/RBCK1/LYN/PIK3CA/CAV1/MAPK3/LTF/HSP90B1/CD81/RELA/NR1H4/ACTB/TLR4/TLR9/MUC5AC/KCNN4/BAX/S100A9	55	BP
GO:0071346	cellular response to interferon-gamma	30/415	153/17910	1.44546171365271e-19	2.04574093359505e-18	7.7926316287064e-19	EDN1/NOS2/ASS1/IRF3/JAK2/WNT5A/B2M/MRC1/STAT1/CCL5/TP53/CLDN1/HLA-C/TLR2/IL12RB1/IRF1/PPARG/GSN/VIM/HLA-A/NR1H2/ARG1/CCL2/IFNG/ICAM1/TLR4/VCAM1/HLA-B/JAK1/CCL3	30	BP
GO:0002526	acute inflammatory response	35/415	220/17910	1.55823736700372e-19	2.20129672158522e-18	8.38517437623327e-19	UGT1A1/C3/ASS1/TFR2/CRP/GSTP1/FN1/HP/TNF/IL1A/F2/PTGS2/CCR7/CR1/INS/IL1B/HAMP/EPO/DNASE1/NLRP3/LBP/CXCR2/PPARG/SERPINA1/STAT3/VTN/S100A8/IL6/PIK3CG/ICAM1/CD81/VCAM1/SERPINC1/F3/CEBPB	35	BP
GO:0001889	liver development	28/415	130/17910	1.69866450581755e-19	2.3952727939831e-18	9.1240675821895e-19	UGT1A1/ASS1/CYP1A1/CCND1/TYMS/TGFB1/PCSK9/TNFAIP3/HMOX1/IL10/EGFR/CLDN1/HAMP/HGF/PKD1/PKD2/SMAD3/EZH2/KRAS/PCNA/ARG1/VTN/ADA/PIK3CA/HNF4A/RELA/CEBPB/JUN	28	BP
GO:0045637	regulation of myeloid cell differentiation	37/415	250/17910	1.71994848057061e-19	2.42084323684709e-18	9.22147045395578e-19	MPL/EP300/GNAS/IL5/TNF/CREBBP/THPO/B2M/CTNNB1/NOTCH2/TGFB1/MYC/STAT1/BGLAP/CREB1/LGALS3/IL4/NFKBIA/NME1/CSF1/CASP8/IL17A/MTOR/MAPK14/STAT3/LYN/FOS/IFNG/LTF/HIF1A/TLR4/CEBPB/CCL3/JUN/PRKCA/CSF2/ADIPOQ	37	BP
GO:0060562	epithelial tube morphogenesis	41/415	313/17910	1.76005841892284e-19	2.47276946058903e-18	9.41926770523315e-19	EDN1/CXCR4/MET/BCL2/EDNRA/AGT/TNF/EGF/SHH/WNT5A/BMP7/CTNNB1/ESR1/VEGFA/TGFB1/MYC/NKX2-1/CCL11/MMP14/BBS4/SRC/CXCL10/AGTR2/TWIST1/TGFB2/PKD1/PKD2/MTHFR/SMAD3/CSF1/CXCR2/TSC2/KRAS/RHOA/SMAD4/VDR/ENG/FGF2/HIF1A/TGFBR2/NOTCH1	41	BP
GO:0006366	transcription by RNA polymerase II	131/415	2581/17910	1.93593079998964e-19	2.71489565655482e-18	1.03415742504249e-18	EDN1/IGF1/EP300/SOD2/SEMA4D/FGFR1/MET/LEP/BRCA1/ELANE/FOXP3/APOE/AIRE/HSPD1/TFR2/IRF3/EZR/RARB/TCF4/NFE2L2/NR1I3/BMP6/PPARGC1A/SNAI1/TNF/IL1A/CREBBP/SHH/TNFRSF1A/XIAP/WNT5A/BMP7/CTNNB1/CCND1/NOTCH2/ESR1/PSMB8/VEGFA/TGFB1/MYC/NKX2-1/SLC11A1/FOXO1/STAT1/MMP12/HMOX1/SMAD2/IL10/MDM2/EGFR/IKBKB/CREB1/IL4/TERT/CXCL10/TP53/CDKN1A/NFKB1/SIRT1/NFKBIA/HAMP/SREBF1/NOD2/TLR2/TWIST1/EPO/HGF/HMGB1/TGFB2/PTEN/I…	131	BP
GO:0050818	regulation of coagulation	23/415	79/17910	2.00076997414286e-19	2.80071352482475e-18	1.06684714755849e-18	EDN1/APOE/NFE2L2/F2/PLAT/APOH/PDGFA/PLG/PLAU/CD36/THBD/PDGFB/VTN/CD34/LYN/CAV1/SH2B3/NOS3/TLR4/SERPINE1/SERPINC1/F3/PRKCA	23	BP
GO:0032640	tumor necrosis factor production	30/415	155/17910	2.13387016383437e-19	2.98159858346675e-18	1.13574984222457e-18	HSPB1/IGF1/LEP/FOXP3/GSTP1/JAK2/WNT5A/AGER/TNFAIP3/PTPRC/CD14/MMP8/IL10/LPL/NOD2/TLR2/HAVCR2/TWIST1/HMGB1/PTPN11/CD36/LBP/CD34/LTF/NR1H4/TLR4/TLR9/MIF/CCL3/ADIPOQ	30	BP
GO:0006953	acute-phase response	19/415	47/17910	2.19578179521689e-19	3.06253776701302e-18	1.16658117728497e-18	UGT1A1/ASS1/TFR2/CRP/FN1/HP/TNF/IL1A/F2/PTGS2/INS/IL1B/HAMP/EPO/LBP/SERPINA1/STAT3/IL6/CEBPB	19	BP
GO:0046425	regulation of JAK-STAT cascade	27/415	120/17910	2.27516313491306e-19	3.1675051977911e-18	1.20656534671877e-18	IGF1/LEP/IL5/AGT/TNF/EGF/JAK2/TNFRSF1A/F2/IL13/PTPRC/IL10/IL4/CCL5/EPO/IFNA2/STAT3/IL6/PECAM1/LYN/IL2/IFNG/CAV1/SH2B3/IFNB1/NOTCH1/CSF2	27	BP
GO:1903708	positive regulation of hemopoiesis	32/415	182/17910	2.69438383568814e-19	3.74436524001146e-18	1.42630274046802e-18	MPL/FOXP3/GNAS/IL5/TNF/SHH/THPO/AGER/TGFB1/STAT1/PTPRC/MMP14/CREB1/IL4/HMGB1/IL12RB1/NLRP3/CSF1/CASP8/RHOA/IL17A/MAPK14/STAT3/ADA/CD80/IL2/FOS/IFNG/HIF1A/TGFBR2/JUN/PRKCA	32	BP
GO:0030324	lung development	31/415	169/17910	2.74286140311441e-19	3.80485376948271e-18	1.44934401711213e-18	EP300/FGFR1/PDGFRB/TNF/SHH/SFTPD/WNT5A/CTNNB1/VEGFA/NKX2-1/IL13/IGFBP5/SMAD2/MAPK1/MMP14/EGFR/CREB1/PDGFA/SREBF1/PKD1/KRAS/ARG1/ADA/CYP1A2/TGFB3/RBP4/FGF7/MAPK3/NOS3/TGFBR2/SPARC	31	BP
GO:0006898	receptor-mediated endocytosis	40/415	301/17910	2.94455441435471e-19	4.07727940077765e-18	1.55311632552308e-18	APOE/C3/TF/TFR2/EZR/HP/EGF/ITGB1/LDLR/SFTPD/B2M/VEGFA/MRC1/PCSK9/CD14/ANXA2/CXCR1/IL4/HBB/ALB/APOC3/CD36/CXCR2/CXCL8/SELE/CALR/VTN/ADRB2/SCARB1/TFRC/HSP90AA1/CAV1/HSP90B1/CD81/SERPINE1/INSR/TGFBR2/CANX/SPARC/APOA1	40	BP
GO:0009897	external side of plasma membrane	33/415	199/18675	1.37768971536951e-19	4.15275042775666e-18	2.3548480849173e-18	TF/TFR2/PKHD1/TNF/ITGB1/LDLR/F2/B2M/SCNN1B/PCSK9/IL13/PTPRC/CD14/CXCL10/PLG/SCNN1G/CD36/IL17A/CALR/TFRC/ADA/ANXA5/ACE/CD34/ENG/PECAM1/ICAM1/TLR4/VCAM1/INSR/TGFBR2/F3/CD40LG	33	CC
GO:0022414	reproductive process	88/415	1353/17910	3.20801618312323e-19	4.43410150491043e-18	1.68903691883107e-18	MMP2/EDN1/IGF1/MMP7/LEP/PTK2/BCL2/CYP1A1/AGT/BMP6/SNAI1/PDGFRB/IL1A/ITGB1/ABCC2/KRT8/SHH/SPP1/WNT5A/PTGS2/BMP7/CTNNB1/CCND1/ESR1/VEGFA/TGFB1/NKX2-1/IGFBP5/GGT1/BRCA2/IL10/MAPK1/MMP14/EGFR/SOD1/BBS4/SRC/IDH1/SIRT1/IL1B/REN/HAVCR2/EPO/TGFB2/PTEN/PKD1/RXRA/PKD2/PTPN11/CSF1/CASP8/KRAS/PPARG/CALCA/AFP/THBD/MTOR/MAPK14/PDGFB/CALR/PCNA/STAT3/ARG1/PTX3/SMAD4/ADA/CASP3/VDR/ACE/TGFB3/RBP4/IGF2/FOS/HSPA5/TO…	88	BP
GO:0061008	hepaticobiliary system development	28/415	133/17910	3.25953288051042e-19	4.49721906404355e-18	1.71307964484541e-18	UGT1A1/ASS1/CYP1A1/CCND1/TYMS/TGFB1/PCSK9/TNFAIP3/HMOX1/IL10/EGFR/CLDN1/HAMP/HGF/PKD1/PKD2/SMAD3/EZH2/KRAS/PCNA/ARG1/VTN/ADA/PIK3CA/HNF4A/RELA/CEBPB/JUN	28	BP
GO:0000003	reproduction	88/415	1354/17910	3.36437616662628e-19	4.63355391407221e-18	1.76501228435912e-18	MMP2/EDN1/IGF1/MMP7/LEP/PTK2/BCL2/CYP1A1/AGT/BMP6/SNAI1/PDGFRB/IL1A/ITGB1/ABCC2/KRT8/SHH/SPP1/WNT5A/PTGS2/BMP7/CTNNB1/CCND1/ESR1/VEGFA/TGFB1/NKX2-1/IGFBP5/GGT1/BRCA2/IL10/MAPK1/MMP14/EGFR/SOD1/BBS4/SRC/IDH1/SIRT1/IL1B/REN/HAVCR2/EPO/TGFB2/PTEN/PKD1/RXRA/PKD2/PTPN11/CSF1/CASP8/KRAS/PPARG/CALCA/AFP/THBD/MTOR/MAPK14/PDGFB/CALR/PCNA/STAT3/ARG1/PTX3/SMAD4/ADA/CASP3/VDR/ACE/TGFB3/RBP4/IGF2/FOS/HSPA5/TO…	88	BP
GO:0002699	positive regulation of immune effector process	33/415	198/17910	4.0416177922653e-19	5.55632070367778e-18	2.11651239625078e-18	FOXP3/C3/HSPD1/IL5/TNF/WNT5A/B2M/TGFB1/IL13/PTPRC/HMOX1/IL4/IL1B/NOD2/IL12RB1/NLRP3/CD36/LBP/MAPK14/ARG1/TFRC/IL6/LYN/RBP4/CD80/IL2/IFNG/MAPK3/CD81/TLR4/TLR9/MIF/LTA	33	BP
GO:0048754	branching morphogenesis of an epithelial tube	29/415	146/17910	4.07247891497412e-19	5.58875008242431e-18	2.12886538769606e-18	EDN1/MET/BCL2/EDNRA/AGT/TNF/EGF/SHH/WNT5A/BMP7/CTNNB1/ESR1/VEGFA/TGFB1/MYC/NKX2-1/CCL11/MMP14/SRC/AGTR2/PKD1/PKD2/CSF1/KRAS/SMAD4/VDR/ENG/FGF2/TGFBR2	29	BP
GO:0043900	regulation of multi-organism process	46/415	408/17910	4.52390356882564e-19	6.19718340934493e-18	2.36062966974465e-18	CXCR4/IGF1/EP300/NOS2/ELANE/APOE/BCL2/HSPA8/BMP6/TNF/SFTPD/TNFAIP3/STAT1/MMP12/ANXA2/EIF2AK2/IL10/CCL5/IL1B/HAVCR2/IL12RB1/IFNA2/CD36/LBP/CXCL8/GSN/MPO/CALR/ARG1/SLPI/CAMP/PTX3/ADA/SP1/IFNG/TOP2A/NR5A2/CAV1/MAPK3/LTF/MIF/LTA/IFNB1/CCL3/JUN/PRKCA	46	BP
GO:0022607	cellular component assembly	136/415	2765/17910	4.60151543200268e-19	6.2922857820179e-18	2.39685604352865e-18	EDN1/EP300/SOD2/SEMA4D/MET/BRCA1/COL1A1/APOE/HSPD1/PTK2/BCL2/ALAD/ACTC1/EZR/IL5/AGT/PKHD1/HPS4/HSPA8/TCF4/FN1/PPARGC1A/SNAI1/PDGFRB/TNF/EGF/CREBBP/ITGB1/KRT8/JAK2/TNFRSF1A/WNT5A/BMP7/CTNNB1/ESR1/ACE2/VEGFA/TGFB1/MYC/VCP/TNFAIP3/MMP1/CCR7/HMGCR/ANXA2/EIF2AK2/CCL11/HMOX1/INS/SMAD2/MMP3/MMP14/MDM2/IKBKB/CREB1/PDGFA/BBS4/BMP1/TERT/SRC/HBB/CCL5/TP53/CAT/CLDN1/ALB/CPT1A/NOD2/TLR2/TWIST1/COL1A2/HMGB1/PT…	136	BP
GO:0048762	mesenchymal cell differentiation	33/415	199/17910	4.74402218485268e-19	6.47563241395965e-18	2.46669640012626e-18	EDN1/FGFR1/COL1A1/BCL2/EDNRA/FN1/SNAI1/SHH/WNT5A/BMP7/CTNNB1/TGFB1/NKX2-1/STAT1/SMAD2/MAPK1/IL1B/TWIST1/HGF/TGFB2/PTEN/SMAD3/EZH2/MTOR/SMAD7/SMAD4/IL6/ENG/TGFB3/MAPK3/HIF1A/TGFBR2/NOTCH1	33	BP
GO:0009890	negative regulation of biosynthetic process	94/415	1522/17910	4.81235642903149e-19	6.5572622618984e-18	2.49779082290716e-18	EDN1/EP300/SEMA4D/FGFR1/LEP/BRCA1/ELANE/FOXP3/BIRC5/APOE/GCK/EZR/HSPA8/GSTP1/NR1I3/BMP6/PPARGC1A/SNAI1/TNF/CREBBP/SHH/SFTPD/WNT5A/BMP7/CTNNB1/CCND1/ESR1/TYMS/VEGFA/TGFB1/MYC/NKX2-1/FOXO1/STAT1/GCLC/IGFBP5/MMP12/PTPRC/EIF2AK2/INS/SMAD2/BRCA2/IL10/MDM2/SOD1/CREB1/PDGFA/IL4/SRC/TP53/NFKB1/SIRT1/HAMP/SREBF1/TWIST1/EPO/HMGB1/IRF1/RXRA/SMAD3/APOC3/IFNA2/EZH2/CD36/PPARG/RHOA/CALCA/NR3C1/SMAD7/PDGFB/CALR…	94	BP
GO:0010634	positive regulation of epithelial cell migration	31/415	173/17910	5.59609798172596e-19	7.58483474242751e-18	2.88921349432468e-18	EDN1/HSPB1/FGFR1/MET/AGT/NFE2L2/WNT5A/PTGS2/VEGFA/TGFB1/HMOX1/SRC/SIRT1/HMGB1/TGFB2/MTOR/PDGFB/CALR/SCARB1/FGF7/SP1/IFNG/FGF2/HIF1A/NOS3/TGFBR2/AKT1/SPARC/JUN/PRKCA/MMP9	31	BP
GO:0030323	respiratory tube development	31/415	173/17910	5.59609798172596e-19	7.58483474242751e-18	2.88921349432468e-18	EP300/FGFR1/PDGFRB/TNF/SHH/SFTPD/WNT5A/CTNNB1/VEGFA/NKX2-1/IL13/IGFBP5/SMAD2/MAPK1/MMP14/EGFR/CREB1/PDGFA/SREBF1/PKD1/KRAS/ARG1/ADA/CYP1A2/TGFB3/RBP4/FGF7/MAPK3/NOS3/TGFBR2/SPARC	31	BP
GO:0034341	response to interferon-gamma	31/415	173/17910	5.59609798172596e-19	7.58483474242751e-18	2.88921349432468e-18	EDN1/NOS2/ASS1/IRF3/JAK2/WNT5A/B2M/MRC1/SLC11A1/STAT1/CCL5/TP53/CLDN1/HLA-C/TLR2/IL12RB1/IRF1/PPARG/GSN/VIM/HLA-A/NR1H2/ARG1/CCL2/IFNG/ICAM1/TLR4/VCAM1/HLA-B/JAK1/CCL3	31	BP
GO:0006874	cellular calcium ion homeostasis	44/415	375/17910	5.97436845137465e-19	8.08327844169263e-18	3.07908055286747e-18	EDN1/ELANE/APOE/BCL2/EDNRA/AGT/PKHD1/ATP7B/JAK2/F2/WNT5A/ESR1/TGFB1/IL13/CCR7/PTPRC/ANXA2/CCL11/GPR35/CXCL10/CCL5/EPO/HMGB1/PKD1/TGM2/NOS1/PKD2/SMAD3/CD36/CALCA/CALR/ATG5/AGTR1/VDR/LYN/PIK3CG/IL2/DDIT3/FGF2/CXCL12/CAV1/HSP90B1/CCL3/BAX	44	BP
GO:0007169	transmembrane receptor protein tyrosine kinase signaling pathway	59/415	669/17910	6.01753226461865e-19	8.12737002699372e-18	3.09587590933391e-18	MMP2/XDH/HSPB1/IGF1/FGFR1/MET/LEP/PTK2/AGT/PDGFRB/EGF/JAK2/WNT5A/CTNNB1/VEGFA/TGFB1/FOXO1/IGFBP5/INS/MAPK1/EGFR/PDGFA/SRC/SIRT1/IL1B/IGFBP3/SREBF1/AGTR2/HGF/PTEN/PTPN11/CSF1/TSC2/RHOA/MAPK14/RAF1/PDGFB/STAT3/VTN/ADRB2/HSP90AA1/CASP3/LYN/IGF2/FGF7/PIK3CA/FGF2/MAPK3/SH2B3/RELA/HIF1A/NR1H4/ACTB/INSR/AKT1/F3/PRKCA/MMP9/ADIPOQ	59	BP
GO:0003018	vascular process in circulatory system	30/415	161/17910	6.62093898773442e-19	8.9111812106896e-18	3.39444508398832e-18	EDN1/SOD2/LEP/APOE/EDNRA/AGT/CRP/PTGS2/ACE2/TGFB1/GCLC/HMGCR/HMOX1/INS/EGFR/SOD1/SRC/HBB/AGTR2/NOS1/CXCR2/RHOA/ATG5/AGTR1/ACE/ICAM1/CAV1/NOS3/AKT1/ACTA2	30	BP
GO:0014706	striated muscle tissue development	44/415	376/17910	6.62680982258048e-19	8.9111812106896e-18	3.39444508398832e-18	EDN1/IGF1/EP300/FGFR1/BCL2/ACTC1/AGT/RARB/PDGFRB/ITGB1/SHH/WNT5A/BMP7/CTNNB1/VEGFA/TGFB1/HMGCR/MAPK1/CREB1/HAMP/AGTR2/TWIST1/TGFB2/PTEN/DSP/RXRA/SMAD3/RHOA/MTOR/MAPK14/SMAD7/ELN/CALR/ATG5/NOX4/SMAD4/ENG/PPARA/RBP4/FOS/FGF2/CAV1/TGFBR2/NOTCH1	44	BP
GO:0010742	macrophage derived foam cell differentiation	17/415	36/17910	6.64425092221879e-19	8.9111812106896e-18	3.39444508398832e-18	EP300/AGT/CRP/TGFB1/STAT1/CETP/LPL/NFKB1/NFKBIA/CSF1/CD36/PPARG/NR1H2/AGTR1/PPARA/CSF2/ADIPOQ	17	BP
GO:0090077	foam cell differentiation	17/415	36/17910	6.64425092221879e-19	8.9111812106896e-18	3.39444508398832e-18	EP300/AGT/CRP/TGFB1/STAT1/CETP/LPL/NFKB1/NFKBIA/CSF1/CD36/PPARG/NR1H2/AGTR1/PPARA/CSF2/ADIPOQ	17	BP
GO:0051253	negative regulation of RNA metabolic process	82/415	1214/17910	7.1169381390754e-19	9.52851386738579e-18	3.62959929667498e-18	EDN1/EP300/SEMA4D/FGFR1/LEP/BRCA1/ELANE/FOXP3/BIRC5/EZR/HSPA8/NR1I3/BMP6/SNAI1/TNF/CREBBP/SHH/WNT5A/BMP7/CTNNB1/CCND1/ESR1/VEGFA/TGFB1/MYC/NKX2-1/SLC11A1/FOXO1/STAT1/GCLC/MMP12/SMAD2/MDM2/CREB1/IL4/TERT/SRC/TP53/NFKB1/SIRT1/HAMP/SREBF1/TWIST1/EPO/HMGB1/IRF1/RXRA/SMAD3/IFNA2/EZH2/CD36/PPARG/CALCA/NR3C1/MTOR/MAPK14/SMAD7/PDGFB/CALR/PCNA/NR1H2/STAT3/SMAD4/DKC1/VDR/PPARA/IGF2/DDIT3/IFNG/CAV1/HNF4A/RE…	82	BP
GO:0030595	leukocyte chemotaxis	32/415	188/17910	7.39512229742568e-19	9.88374171403763e-18	3.76491260579237e-18	EDN1/CXCR4/SFTPD/WNT5A/CCR7/CCL11/CXCR1/IL10/LGALS3/CXCL10/CCL5/HMGB1/TGFB2/CSF1/LBP/CXCR2/CALCA/CXCL8/MAPK14/PDGFB/CALR/S100A8/CCL2/IL6/LYN/PIK3CG/CXCL12/MAPK3/SERPINE1/MIF/CCL3/S100A9	32	BP
GO:0009790	embryo development	72/415	968/17910	7.72974299622854e-19	1.03130338413223e-17	3.92843846354378e-18	MMP2/EDN1/IGF1/EP300/FGFR1/COL1A1/GNAS/EDNRA/RARB/FN1/NFE2L2/SNAI1/TNF/CREBBP/ITGB1/KRT8/SHH/WNT5A/BMP7/CTNNB1/VEGFA/TGFB1/EXOC4/SMAD2/BRCA2/MMP8/IL10/MAPK1/MMP14/EGFR/SOD1/PDGFA/BBS4/SCT/POLE/TP53/TWIST1/TGFB2/PKD1/RXRA/PKD2/MTHFR/SMAD3/CASP8/TSC2/CXCL8/PDGFB/VTN/SMAD4/ADA/ENG/TGFB3/RBP4/IGF2/FGF2/TOP2A/NR5A2/MAPK3/HNF4A/SH2B3/HIF1A/NOS3/INSR/TGFBR2/AKT1/APOA1/CEBPB/NOTCH1/BAX/CSF2/MMP9/ADIPOQ	72	BP
GO:0010720	positive regulation of cell development	52/415	528/17910	7.78894087545721e-19	1.03740053081263e-17	3.9516637005649e-18	EDN1/CXCR4/MPL/IGF1/EP300/SEMA4D/FGFR1/APOE/BCL2/IL5/AGT/RARB/TCF4/FN1/NFE2L2/BMP6/TNF/SHH/WNT5A/BMP7/AGER/CTNNB1/VEGFA/TGFB1/TUBB2B/IL1B/HAMP/TLR2/NME1/EPO/HGF/PTEN/EZH2/CSF1/PPARG/RHOA/MTOR/CALR/IL6/LYN/IL2/HSPA5/CXCL12/TNFRSF1B/RELA/HIF1A/APOA1/LTA/CCL3/NOTCH1/S100A9/ADIPOQ	52	BP
GO:0045766	positive regulation of angiogenesis	33/415	203/17910	8.91747293826238e-19	1.18565362509596e-17	4.51638904412815e-18	HSPB1/CXCR4/BRCA1/C3/NFE2L2/IL1A/ITGB1/WNT5A/PTGS2/VEGFA/CCL11/HMOX1/IL10/TERT/SIRT1/IL1B/TWIST1/HGF/CXCR2/CXCL8/STAT3/AGTR1/CD34/ENG/SP1/FGF2/HIF1A/NOS3/SERPINE1/TGFBR2/JAK1/F3/PRKCA	33	BP
GO:1904018	positive regulation of vasculature development	35/415	232/17910	9.0796059137907e-19	1.20512558631229e-17	4.5905615937191e-18	HSPB1/CXCR4/SOD2/BRCA1/C3/NFE2L2/IL1A/ITGB1/WNT5A/PTGS2/VEGFA/CCL11/HMOX1/IL10/TERT/SIRT1/IL1B/TWIST1/HGF/CXCR2/CXCL8/PDGFB/STAT3/AGTR1/CD34/ENG/SP1/FGF2/HIF1A/NOS3/SERPINE1/TGFBR2/JAK1/F3/PRKCA	35	BP
GO:0030879	mammary gland development	28/415	138/17910	9.28567150564144e-19	1.23035147449749e-17	4.68665198860051e-18	XDH/ATP7B/EGF/JAK2/WNT5A/CCND1/ESR1/VEGFA/TGFB1/IGFBP5/CCL11/BRCA2/MAPK1/CREB1/SRC/NME1/FASN/CSF1/ARG1/VDR/TGFB3/CAV1/HIF1A/TGFBR2/AKT1/SERPINC1/CEBPB/BAX	28	BP
GO:0009914	hormone transport	40/415	311/17910	9.67387600761838e-19	1.27958239446725e-17	4.87418229498808e-18	EDN1/NOS2/FGFR1/LEP/GNAS/GCK/TFR2/AGT/BMP6/TNF/ABCC2/JAK2/SPP1/HMGCR/INS/SMAD2/EGFR/CREB1/CCL5/IL1B/REN/CPT1A/SREBF1/AGTR2/PTPN11/RAF1/AGTR1/SMAD4/IL6/TTR/LYN/RBP4/IFNG/GLUL/HNF4A/HIF1A/CFTR/NR1H4/PRKCA/ADIPOQ	40	BP
GO:0032680	regulation of tumor necrosis factor production	29/415	151/17910	1.08140473812423e-18	1.42793735609703e-17	5.43929567141163e-18	HSPB1/IGF1/LEP/FOXP3/GSTP1/JAK2/WNT5A/AGER/TNFAIP3/PTPRC/CD14/MMP8/IL10/LPL/NOD2/TLR2/HAVCR2/TWIST1/PTPN11/CD36/LBP/CD34/LTF/NR1H4/TLR4/TLR9/MIF/CCL3/ADIPOQ	29	BP
GO:0031669	cellular response to nutrient levels	34/415	220/17910	1.33837657042703e-18	1.76422366101745e-17	6.72027668566863e-18	LEP/COL1A1/BCL2/HSPA8/NFE2L2/PTGS2/PCSK9/FOXO1/EIF2AK2/HMOX1/BGLAP/MAPK1/MDM2/SOD1/MAPK8/TP53/CDKN1A/LPL/SIRT1/ALB/SREBF1/FAS/PPARG/MTOR/VDR/PRKAA2/HSPA5/GLUL/ICAM1/MAPK3/HSP90B1/NR1H4/LCN2/JUN	34	BP
GO:0065003	protein-containing complex assembly	101/415	1742/17910	1.43861014697775e-18	1.89310256498699e-17	7.21120190833655e-18	EP300/SOD2/MET/COL1A1/APOE/HSPD1/PTK2/ALAD/IL5/HSPA8/TCF4/FN1/PPARGC1A/TNF/EGF/CREBBP/JAK2/TNFRSF1A/CTNNB1/ESR1/VEGFA/TGFB1/MYC/VCP/TNFAIP3/MMP1/CCR7/HMGCR/ANXA2/EIF2AK2/CCL11/HMOX1/INS/SMAD2/MMP3/MDM2/CREB1/BBS4/BMP1/TERT/SRC/HBB/CCL5/TP53/CAT/CLDN1/ALB/CPT1A/NOD2/TWIST1/COL1A2/HMGB1/AXIN1/NLRP3/PKD1/FARSB/TGM2/RXRA/PKD2/PTPN11/SMAD3/APOC3/FAS/CD36/CASP8/HSPA4/RHOA/SERPINA1/MTTP/MTOR/STEAP4/RAF1…	101	BP
GO:0060541	respiratory system development	32/415	193/17910	1.66467745730985e-18	2.18684551443183e-17	8.33012687139667e-18	EP300/FGFR1/ASS1/PDGFRB/TNF/SHH/SFTPD/WNT5A/CTNNB1/VEGFA/NKX2-1/IL13/IGFBP5/SMAD2/MAPK1/MMP14/EGFR/CREB1/PDGFA/SREBF1/PKD1/KRAS/ARG1/ADA/CYP1A2/TGFB3/RBP4/FGF7/MAPK3/NOS3/TGFBR2/SPARC	32	BP
GO:0048145	regulation of fibroblast proliferation	23/415	86/17910	1.67459340568455e-18	2.19611780250611e-17	8.36544684966543e-18	IGF1/AGT/GSTP1/FN1/PDGFRB/WNT5A/CTNNB1/ESR1/TGFB1/MYC/IL13/EGFR/CREB1/PDGFA/TP53/CDKN1A/AGTR2/PPARG/PDGFB/MIF/LTA/JUN/BAX	23	BP
GO:1904892	regulation of STAT cascade	27/415	129/17910	1.68208906629216e-18	2.20218985936205e-17	8.3885765145853e-18	IGF1/LEP/IL5/AGT/TNF/EGF/JAK2/TNFRSF1A/F2/IL13/PTPRC/IL10/IL4/CCL5/EPO/IFNA2/STAT3/IL6/PECAM1/LYN/IL2/IFNG/CAV1/SH2B3/IFNB1/NOTCH1/CSF2	27	BP
GO:0051345	positive regulation of hydrolase activity	59/415	684/17910	1.73964821758739e-18	2.27367288302025e-17	8.66086948283301e-18	XDH/SEMA4D/FGFR1/HSPD1/EDNRA/AGT/FN1/PDGFRB/TNF/ITGB1/JAK2/WNT5A/AGER/ESR1/VEGFA/MYC/VCP/CCR7/CR1/PTPRC/CCL11/EGFR/APOH/MAPK8/CCL5/SIRT1/AGTR2/HMGB1/NLRP3/SMAD3/EZH2/FAS/CASP8/TSC2/PPARG/RHOA/SELE/MTOR/MAPK14/GSN/PCNA/NR1H2/STAT3/AGTR1/S100A8/LYN/FABP1/IFNG/FGF2/ICAM1/CAV1/MAPK3/AKT1/ALDOB/F3/APOA1/JUN/BAX/S100A9	59	BP
GO:0018209	peptidyl-serine modification	36/415	252/17910	1.77937178401193e-18	2.3216421324502e-17	8.84359383672089e-18	BCL2/TNF/WNT5A/PTGS2/VEGFA/TGFB1/MAPK1/EGFR/IKBKB/MAPK8/SRC/EPO/HGF/AXIN1/PKD1/NOS1/MTOR/MAPK14/RAF1/SMAD7/PDGFB/CSF3/IL6/HSP90AA1/PRKAA2/PIK3CA/IFNG/CAV1/MAPK3/TGFBR2/AKT1/MIF/TXN/IFNB1/BAX/PRKCA	36	BP
GO:0071260	cellular response to mechanical stimulus	22/415	77/17910	1.94324993369606e-18	2.53116537973801e-17	9.64170930527877e-18	MMP7/COL1A1/AGT/BMP6/TNFRSF1A/PTGS2/TGFB1/IL13/GCLC/EGFR/TLR7/MAPK8/NFKB1/IL1B/IRF1/PTPN11/FAS/CASP8/ENG/MAPK3/TLR4/AKT1	22	BP
GO:0045892	negative regulation of transcription, DNA-templated	76/415	1083/17910	2.00932575179907e-18	2.6128034522125e-17	9.95268486197028e-18	EDN1/EP300/SEMA4D/FGFR1/LEP/BRCA1/ELANE/FOXP3/BIRC5/EZR/HSPA8/NR1I3/BMP6/SNAI1/TNF/CREBBP/SHH/WNT5A/BMP7/CTNNB1/CCND1/ESR1/VEGFA/TGFB1/MYC/NKX2-1/FOXO1/STAT1/GCLC/MMP12/SMAD2/MDM2/CREB1/IL4/SRC/TP53/NFKB1/SIRT1/HAMP/SREBF1/TWIST1/EPO/HMGB1/IRF1/RXRA/SMAD3/IFNA2/EZH2/CD36/PPARG/CALCA/NR3C1/SMAD7/PDGFB/CALR/PCNA/NR1H2/STAT3/SMAD4/VDR/PPARA/IGF2/DDIT3/IFNG/CAV1/HNF4A/RELA/NR1H4/TXN/NR1I2/CDKN2A/CEBP…	76	BP
GO:0048144	fibroblast proliferation	23/415	87/17910	2.22854819410059e-18	2.892971768862e-17	1.10199013652094e-17	IGF1/AGT/GSTP1/FN1/PDGFRB/WNT5A/CTNNB1/ESR1/TGFB1/MYC/IL13/EGFR/CREB1/PDGFA/TP53/CDKN1A/AGTR2/PPARG/PDGFB/MIF/LTA/JUN/BAX	23	BP
GO:0055074	calcium ion homeostasis	44/415	388/17910	2.23748646368334e-18	2.89967680833162e-17	1.1045442186036e-17	EDN1/ELANE/APOE/BCL2/EDNRA/AGT/PKHD1/ATP7B/JAK2/F2/WNT5A/ESR1/TGFB1/IL13/CCR7/PTPRC/ANXA2/CCL11/GPR35/CXCL10/CCL5/EPO/HMGB1/PKD1/TGM2/NOS1/PKD2/SMAD3/CD36/CALCA/CALR/ATG5/AGTR1/VDR/LYN/PIK3CG/IL2/DDIT3/FGF2/CXCL12/CAV1/HSP90B1/CCL3/BAX	44	BP
GO:0046394	carboxylic acid biosynthetic process	46/415	426/17910	2.54642261622216e-18	3.29448784607194e-17	1.25493554770757e-17	EDN1/IGF1/BRCA1/CYP2D6/GPD1/GCK/ASS1/CYP1A1/PPARGC1A/EGF/PTGS2/CBS/CYP2C9/TGFB1/GPT/ABCD3/GGT1/INS/AKR1D1/TP53/LPL/ABCB11/NFKB1/SIRT1/IL1B/AGXT/ALOX5/FASN/APOC3/PDGFB/NR1H2/STAT3/CYP2E1/PRKAA2/PPARA/CYP1A2/GLUL/HIF1A/NR1H4/INSR/MIF/GPT2/ALDOB/CYP3A4/PAH/ADIPOQ	46	BP
GO:0044085	cellular component biogenesis	140/415	2951/17910	2.73348629930193e-18	3.53056171598913e-17	1.34486075158933e-17	EDN1/EP300/SOD2/SEMA4D/MET/BRCA1/COL1A1/APOE/HSPD1/PTK2/BCL2/ALAD/ACTC1/EZR/IL5/AGT/PKHD1/HPS4/HSPA8/TCF4/FN1/PPARGC1A/SNAI1/PDGFRB/TNF/EGF/CREBBP/ITGB1/NOP10/KRT8/JAK2/TNFRSF1A/WNT5A/BMP7/CTNNB1/ESR1/ACE2/VEGFA/TGFB1/MYC/VCP/TNFAIP3/MMP1/CCR7/HMGCR/ANXA2/EIF2AK2/CCL11/HMOX1/INS/SMAD2/MMP3/MMP14/MDM2/IKBKB/CREB1/PDGFA/BBS4/BMP1/TERT/SRC/HBB/CCL5/TP53/CAT/CLDN1/SIRT1/ALB/CPT1A/NOD2/TLR2/TWIST1/COL…	140	BP
GO:0016053	organic acid biosynthetic process	46/415	427/17910	2.79520154751722e-18	3.6042154182332e-17	1.37291690279855e-17	EDN1/IGF1/BRCA1/CYP2D6/GPD1/GCK/ASS1/CYP1A1/PPARGC1A/EGF/PTGS2/CBS/CYP2C9/TGFB1/GPT/ABCD3/GGT1/INS/AKR1D1/TP53/LPL/ABCB11/NFKB1/SIRT1/IL1B/AGXT/ALOX5/FASN/APOC3/PDGFB/NR1H2/STAT3/CYP2E1/PRKAA2/PPARA/CYP1A2/GLUL/HIF1A/NR1H4/INSR/MIF/GPT2/ALDOB/CYP3A4/PAH/ADIPOQ	46	BP
GO:0060759	regulation of response to cytokine stimulus	31/415	183/17910	3.05400861113692e-18	3.93133269289568e-17	1.49752233934087e-17	EDN1/GSTP1/TNF/JAK2/TNFRSF1A/WNT5A/TNFAIP3/STAT1/MMP12/PTPRC/IKBKB/CCL5/TLR2/PTPN11/CSF1/CASP8/PPARG/CHUK/NR1H2/ARG1/IL6/RBCK1/IFNG/CAV1/SH2B3/HIF1A/NR1H4/TLR4/JAK1/APOA1/ADIPOQ	31	BP
GO:0042542	response to hydrogen peroxide	28/415	144/17910	3.07107705965518e-18	3.94669351228262e-17	1.50337357910598e-17	MET/COL1A1/BCL2/NFE2L2/HP/PDGFRB/TNFAIP3/FOXO1/STAT1/HMOX1/IL10/MDM2/SOD1/SRC/HBB/SIRT1/HGF/EZH2/PCNA/ARG1/ADA/IL6/CASP3/FABP1/RELA/LCN2/TXN/JUN	28	BP
GO:0062023	collagen-containing extracellular matrix	44/415	399/18675	1.40909720129583e-18	4.05435694736483e-17	2.29905332843004e-17	MMP2/ELANE/COL1A1/APOE/AGT/FN1/SHH/F2/WNT5A/BMP7/TGFB1/ANXA2/MMP8/APOH/LGALS3/PLG/COL1A2/TGFB2/TGM2/APOC3/IFNA2/CDH2/SERPINA1/PDGFB/ELN/CALR/SLPI/VTN/S100A8/ANXA5/COL3A1/TGFB3/CXCL12/ICAM1/HSP90B1/SERPINE1/SPARC/SERPINC1/F3/APOA1/PRSS1/S100A9/MMP9/ADIPOQ	44	CC
GO:0032642	regulation of chemokine production	22/415	79/17910	3.59524563559529e-18	4.61259811511682e-17	1.75702980627194e-17	ELANE/GSTP1/TNF/WNT5A/AGER/EIF2AK2/HMOX1/IL10/TLR7/LPL/IL1B/TLR2/HAVCR2/TWIST1/LBP/IL6/HIF1A/NR1H4/TLR4/TLR9/MIF/ADIPOQ	22	BP
GO:0071383	cellular response to steroid hormone stimulus	35/415	242/17910	3.62412767562847e-18	4.6419035312008e-17	1.76819281858294e-17	EDN1/EP300/UGT1A1/BRCA1/ASS1/RARB/GSTP1/NR1I3/PPARGC1A/ABCC2/JAK2/BMP7/CTNNB1/ESR1/TGFB1/FOXO1/EGFR/SRC/SIRT1/AGTR2/AXIN1/RXRA/PPARG/RHOA/NR3C1/CALR/NR1H2/ARG1/VDR/PPARA/NR5A2/ICAM1/HNF4A/NR1H4/NR1I2	35	BP
GO:0002687	positive regulation of leukocyte migration	26/415	121/17910	3.66017987666986e-18	4.68027992549216e-17	1.78281114581292e-17	EDN1/ELANE/TNF/WNT5A/AGER/VEGFA/TGFB1/CCR7/MMP14/LGALS3/CXCL10/CCL5/HMGB1/CSF1/LBP/CXCR2/RHOA/CXCL8/MAPK14/CALR/IL6/CXCL12/ICAM1/MAPK3/SERPINE1/CCL3	26	BP
GO:0050880	regulation of blood vessel size	27/415	133/17910	3.87524664285234e-18	4.94705489207977e-17	1.88443100433159e-17	EDN1/SOD2/LEP/APOE/EDNRA/AGT/CRP/PTGS2/ACE2/GCLC/HMGCR/HMOX1/INS/EGFR/SOD1/HBB/AGTR2/NOS1/RHOA/ATG5/AGTR1/ACE/ICAM1/CAV1/NOS3/AKT1/ACTA2	27	BP
GO:0031331	positive regulation of cellular catabolic process	41/415	341/17910	4.15983981105966e-18	5.30155372271866e-17	2.01946661683808e-17	IGF1/APOE/PTK2/GPD1/EZR/NFE2L2/TNF/EGF/LDLR/PCSK9/VCP/TNFAIP3/FOXO1/GCLC/HMOX1/INS/MDM2/IL4/SIRT1/IL1B/CPT1A/TWIST1/PTEN/AXIN1/TSC2/SMAD7/ADRB2/IL6/HSP90AA1/PRKAA2/PPARA/FABP1/IFNG/CAV1/TNFRSF1B/MAPK3/CD81/HIF1A/INSR/AKT1/BAX	41	BP
GO:0071229	cellular response to acid chemical	32/415	199/17910	4.26143052965958e-18	5.4220353676215e-17	2.06536045712501e-17	MMP2/EDN1/LEP/COL1A1/ASS1/PPARGC1A/TNF/LDLR/WNT5A/VEGFA/GCLC/EGFR/CREB1/SRC/LPL/CLDN1/CPT1A/HAMP/SREBF1/NME1/COL1A2/PKD2/PPARG/MTOR/PDGFB/COL3A1/PRKAA2/LYN/ABCB4/NR1H4/AKT1/CEBPB	32	BP
GO:0048568	embryonic organ development	45/415	413/17910	4.29513972584546e-18	5.45589236249956e-17	2.07825725577664e-17	EDN1/FGFR1/GNAS/RARB/SNAI1/TNF/KRT8/SHH/WNT5A/BMP7/CTNNB1/VEGFA/TGFB1/SMAD2/IL10/MAPK1/MMP14/EGFR/SOD1/PDGFA/BBS4/SCT/POLE/TP53/TWIST1/TGFB2/PKD1/PKD2/SMAD3/CASP8/CXCL8/PDGFB/ADA/ENG/TGFB3/RBP4/IGF2/MAPK3/SH2B3/HIF1A/TGFBR2/AKT1/CEBPB/NOTCH1/CSF2	45	BP
GO:0035150	regulation of tube size	27/415	134/17910	4.75131504687507e-18	6.02538880119388e-17	2.29518970737529e-17	EDN1/SOD2/LEP/APOE/EDNRA/AGT/CRP/PTGS2/ACE2/GCLC/HMGCR/HMOX1/INS/EGFR/SOD1/HBB/AGTR2/NOS1/RHOA/ATG5/AGTR1/ACE/ICAM1/CAV1/NOS3/AKT1/ACTA2	27	BP
GO:0070374	positive regulation of ERK1 and ERK2 cascade	31/415	186/17910	4.96937990168975e-18	6.29154605345729e-17	2.39657426629657e-17	APOE/PDGFRB/TNF/THPO/AGER/NOTCH2/TGFB1/CCR7/PTPRC/HMGCR/EGFR/PDGFA/SRC/NOD2/HAVCR2/EPO/HMGB1/PTEN/PTPN11/CD36/PDGFB/NOX4/FGF2/ICAM1/MAPK3/TLR4/MIF/CCL3/JUN/NOTCH1/PRKCA	31	BP
GO:0030855	epithelial cell differentiation	61/415	746/17910	5.8006379541129e-18	7.33189188772329e-17	2.79286256066274e-17	XDH/CXCR4/FGFR1/MET/CYP1A1/EZR/RARB/BMP6/TNF/KRT8/TNFRSF1A/WNT5A/BMP7/CTNNB1/CCND1/ESR1/TYMS/VEGFA/TGFB1/NKX2-1/IL13/STAT1/IKBKB/SOD1/CREB1/LGALS3/CDKN1A/CLDN1/IL1B/CPT1A/DSP/FASN/RXRA/SMAD3/EZH2/CDH2/PPARG/RHOA/PDGFB/VIM/PCNA/SMAD4/VDR/CD34/ENG/PECAM1/IFNG/NR5A2/ICAM1/CAV1/HNF4A/HIF1A/GSTM3/SERPINE1/AKT1/ACTA2/CEBPB/JUN/NOTCH1/MMP9/ADIPOQ	61	BP
GO:0071214	cellular response to abiotic stimulus	39/415	310/17910	5.85090920356336e-18	7.37118643104662e-17	2.80783062900944e-17	EP300/MMP7/COL1A1/AGT/BMP6/CREBBP/TNFRSF1A/PTGS2/TGFB1/MYC/IL13/GCLC/MDM2/EGFR/TLR7/MAPK8/TP53/CDKN1A/NFKB1/SIRT1/IL1B/HAMP/EPO/PTEN/IRF1/PKD2/PTPN11/FAS/CASP8/MAPK14/PCNA/NOX4/CASP3/ENG/HSPA5/MAPK3/TLR4/AKT1/BAX	39	BP
GO:0104004	cellular response to environmental stimulus	39/415	310/17910	5.85090920356336e-18	7.37118643104662e-17	2.80783062900944e-17	EP300/MMP7/COL1A1/AGT/BMP6/CREBBP/TNFRSF1A/PTGS2/TGFB1/MYC/IL13/GCLC/MDM2/EGFR/TLR7/MAPK8/TP53/CDKN1A/NFKB1/SIRT1/IL1B/HAMP/EPO/PTEN/IRF1/PKD2/PTPN11/FAS/CASP8/MAPK14/PCNA/NOX4/CASP3/ENG/HSPA5/MAPK3/TLR4/AKT1/BAX	39	BP
GO:0052547	regulation of peptidase activity	44/415	398/17910	5.94743184907484e-18	7.48052598365633e-17	2.84948022607927e-17	XDH/BIRC5/C3/HSPD1/FN1/TNF/JAK2/XIAP/PTGS2/AGER/PSMB8/VEGFA/MYC/VCP/CR1/MDM2/SRC/SIRT1/HGF/HMGB1/NLRP3/SMAD3/FAS/CASP8/PPARG/RHOA/MAPK14/RAF1/GSN/STAT3/SLPI/VTN/S100A8/LYN/FABP1/CAV1/MAPK3/LTF/SERPINE1/AKT1/F3/BAX/S100A9/MMP9	44	BP
GO:0031098	stress-activated protein kinase signaling cascade	37/415	278/17910	6.52713558443926e-18	8.19624787032937e-17	3.12211284147327e-17	XDH/EDN1/LEP/EZR/AGT/GSTP1/TNF/WNT5A/AGER/VEGFA/MYC/FOXO1/CCR7/HMGCR/EIF2AK2/MMP8/MAPK1/EGFR/IKBKB/MAPK8/NFKB1/IL1B/NOD2/HGF/HMGB1/TGFB2/AXIN1/FAS/RHOA/MAPK14/CHUK/LYN/MAPK3/TLR4/TLR9/AKT1/CD40LG	37	BP
GO:0043269	regulation of ion transport	56/415	639/17910	6.91673472909541e-18	8.67130610001603e-17	3.30307191235757e-17	EDN1/CXCR4/FGFR1/LEP/APOE/BCL2/TF/GCK/AGT/PPARGC1A/PDGFRB/EGF/F2/PTGS2/B2M/CTNNB1/ACE2/TGFB1/PCSK9/IL13/LGALS3/GPR35/CXCL10/CCL5/IL1B/AGTR2/TWIST1/EPO/PTEN/NOS1/PKD2/RHOA/ABCB1/MTOR/PDGFB/ATG5/ARG1/ADRB2/CCL2/LYN/PIK3CG/IFNG/CXCL12/ICAM1/CAV1/ABCB4/NOS3/CFTR/TLR9/AKT1/MIF/APOA1/CEBPB/CCL3/BAX/MMP9	56	BP
GO:0002706	regulation of lymphocyte mediated immunity	27/415	136/17910	7.10268513737101e-18	8.88992431281697e-17	3.3863479113713e-17	LEP/FOXP3/C3/HSPD1/TNF/B2M/AGER/TGFB1/CR1/PTPRC/IL10/IL4/IL1B/HAVCR2/HMGB1/IL12RB1/NLRP3/IFNA2/SMAD7/ARG1/TFRC/IL6/IL2/TNFRSF1B/CD81/LTA/IFNB1	27	BP
GO:0045934	negative regulation of nucleobase-containing compound metabolic process	85/415	1342/17910	7.71071225981571e-18	9.63525588889166e-17	3.67025944279803e-17	EDN1/EP300/SEMA4D/FGFR1/LEP/BRCA1/ELANE/FOXP3/BIRC5/EZR/HSPA8/NR1I3/BMP6/PPARGC1A/SNAI1/TNF/CREBBP/SHH/WNT5A/BMP7/CTNNB1/CCND1/ESR1/VEGFA/TGFB1/MYC/NKX2-1/SLC11A1/FOXO1/STAT1/GCLC/MMP12/SMAD2/BRCA2/MDM2/CREB1/IL4/TERT/SRC/TP53/NFKB1/SIRT1/HAMP/SREBF1/TWIST1/EPO/HMGB1/IRF1/RXRA/SMAD3/IFNA2/EZH2/CD36/PPARG/RHOA/CALCA/NR3C1/MTOR/MAPK14/SMAD7/PDGFB/CALR/PCNA/NR1H2/STAT3/SMAD4/DKC1/VDR/PPARA/IGF2/DDIT…	85	BP
GO:0032635	interleukin-6 production	28/415	149/17910	7.94687913137714e-18	9.89817927465694e-17	3.77041215804143e-17	NOS2/LEP/FOXP3/HSPD1/TNF/WNT5A/AGER/TNFAIP3/MMP8/IL10/LPL/IL1B/NOD2/TLR2/HAVCR2/TWIST1/HGF/HMGB1/PTPN11/CD36/LBP/IL17A/STAT3/IL6/NR1H4/TLR4/TLR9/CEBPB	28	BP
GO:0051092	positive regulation of NF-kappaB transcription factor activity	28/415	149/17910	7.94687913137714e-18	9.89817927465694e-17	3.77041215804143e-17	AGT/TNF/WNT5A/AGER/TGFB1/EIF2AK2/INS/IKBKB/CAT/NFKB1/IL1B/NOD2/TLR2/NLRP3/CD36/KRAS/CHUK/STAT3/S100A8/RBCK1/ICAM1/CAV1/LTF/RELA/TLR4/TLR9/CD40LG/S100A9	28	BP
GO:0061045	negative regulation of wound healing	21/415	73/17910	1.00233347215432e-17	1.24642924490388e-16	4.74789539441522e-17	EDN1/APOE/F2/AGER/HMGCR/PLAT/APOH/PDGFA/PLG/CDKN1A/PLAU/PTEN/SMAD3/THBD/PDGFB/VTN/CD34/FGF2/SH2B3/NOS3/SERPINE1	21	BP
GO:0060627	regulation of vesicle-mediated transport	48/415	480/17910	1.03270412021982e-17	1.28212135119375e-16	4.88385368307343e-17	APOE/C3/TF/TFR2/EZR/TNF/EGF/SFTPD/WNT5A/B2M/VEGFA/TGFB1/PCSK9/IL13/SLC11A1/PTPRC/CD14/ANXA2/HMOX1/MAPK1/SOD1/LGALS3/IL4/SRC/IL1B/TLR2/HMGB1/PTEN/APOC3/CD36/TSC2/PPARG/SELE/CALR/ATG5/NR1H2/VTN/PTX3/SCARB1/CCL2/LYN/IFNG/CAV1/MAPK3/CFTR/SERPINE1/APOA1/ADIPOQ	48	BP
GO:0055114	oxidation-reduction process	69/415	944/17910	1.16674022204449e-17	1.44619332361483e-16	5.50883626062094e-17	XDH/IGF1/NOS2/SOD2/LEP/CYP2D6/CYP2C19/GNAS/ALDH2/GPD1/GCK/CYP1A1/GAA/PPARGC1A/CYP3A5/PTGS2/CBS/CYP2C9/MYC/VCP/HMGCR/FH/ABCD3/HMOX1/INS/ACADM/SOD1/AKR1D1/HADHB/GFER/TP53/CAT/CPOX/HADHA/IDH1/CPT1A/TWIST1/ALOX5/FASN/NOS1/MTHFR/PPARG/MTOR/STEAP4/MAPK14/SLC25A13/MPO/NOX4/CYP2E1/CPT2/PPARA/CYP1A2/IGF2/PYGL/FABP1/PIK3CA/HIF1A/NOS3/VCAM1/INSR/AKT1/CYP2B6/TXN/ALDOB/APOA1/CP/CYP3A4/PAH/ADIPOQ	69	BP
GO:0008083	growth factor activity	29/412	147/16967	1.70287227780905e-18	1.54109941141719e-16	9.75417190709921e-17	IGF1/IL5/AGT/BMP6/EGF/THPO/F2/BMP7/VEGFA/TGFB1/IL10/PDGFA/IL4/BMP1/GFER/HGF/TYMP/TGFB2/CSF1/PDGFB/IL6/TGFB3/IGF2/FGF7/IL2/FGF2/CXCL12/CXCL1/CSF2	29	MF
GO:0048738	cardiac muscle tissue development	33/415	221/17910	1.27539642648762e-17	1.57832875000923e-16	6.01216622097137e-17	EDN1/IGF1/FGFR1/ACTC1/AGT/RARB/PDGFRB/ITGB1/WNT5A/BMP7/VEGFA/TGFB1/MAPK1/CREB1/HAMP/AGTR2/TGFB2/PTEN/DSP/RXRA/MTOR/MAPK14/SMAD7/CALR/ATG5/NOX4/SMAD4/ENG/PPARA/RBP4/FGF2/TGFBR2/NOTCH1	33	BP
GO:0043933	protein-containing complex subunit organization	109/415	2032/17910	1.30383643902302e-17	1.61092974821414e-16	6.1363498678677e-17	EP300/SOD2/MET/COL1A1/APOE/HSPD1/PTK2/ALAD/IL5/AGT/HSPA8/TCF4/FN1/PPARGC1A/TNF/EGF/CREBBP/JAK2/TNFRSF1A/CTNNB1/ESR1/VEGFA/TGFB1/MYC/VCP/TNFAIP3/MMP1/CCR7/HMGCR/ANXA2/EIF2AK2/CCL11/HMOX1/INS/SMAD2/MMP3/MDM2/CREB1/BBS4/BMP1/TERT/CETP/SRC/HBB/CCL5/TP53/LPL/CAT/CLDN1/ALB/CPT1A/NOD2/TWIST1/COL1A2/HMGB1/TGFB2/AXIN1/NLRP3/PKD1/FARSB/TGM2/RXRA/PKD2/PTPN11/SMAD3/APOC3/FAS/CD36/CASP8/HSPA4/RHOA/SERPINA1/MT…	109	BP
GO:0032868	response to insulin	35/415	252/17910	1.34918321456324e-17	1.66428138104631e-16	6.33957678415203e-17	LEP/GCK/AGT/GSTP1/PCSK9/FOXO1/STAT1/GCLC/INS/BGLAP/IL10/SRC/LPL/CAT/HADHA/SIRT1/IL1B/SREBF1/TLR2/PTEN/PTPN11/TSC2/PPARG/MTOR/PPARA/LYN/IGF2/SP1/PIK3CA/ICAM1/RELA/NR1H4/INSR/AKT1/ADIPOQ	35	BP
GO:0046879	hormone secretion	38/415	301/17910	1.41126595377923e-17	1.73807353442202e-16	6.62066568397445e-17	EDN1/NOS2/FGFR1/LEP/GNAS/GCK/TFR2/AGT/BMP6/TNF/JAK2/SPP1/HMGCR/INS/SMAD2/EGFR/CREB1/CCL5/IL1B/REN/CPT1A/SREBF1/AGTR2/PTPN11/RAF1/AGTR1/SMAD4/IL6/LYN/RBP4/IFNG/GLUL/HNF4A/HIF1A/CFTR/NR1H4/PRKCA/ADIPOQ	38	BP
GO:0051341	regulation of oxidoreductase activity	24/415	105/17910	1.59417117552766e-17	1.96019287742881e-16	7.46676217118724e-17	EDN1/LEP/APOE/AGT/HP/TNF/IL13/INS/EGFR/TERT/NFKB1/IL1B/NOD2/AGTR2/KRAS/AGTR1/SCARB1/HSP90AA1/VDR/IFNG/CAV1/HIF1A/NOS3/AKT1	24	BP
GO:0045807	positive regulation of endocytosis	27/415	141/17910	1.88117606672354e-17	2.30939905315821e-16	8.7969575274225e-17	APOE/C3/TF/TFR2/TNF/EGF/SFTPD/WNT5A/B2M/VEGFA/PCSK9/SLC11A1/PTPRC/CD14/ANXA2/SOD1/IL4/IL1B/CD36/PPARG/SELE/CALR/VTN/PTX3/CCL2/SERPINE1/APOA1	27	BP
GO:0002761	regulation of myeloid leukocyte differentiation	25/415	117/17910	1.89101374789716e-17	2.31777362880219e-16	8.8288579415798e-17	GNAS/IL5/TNF/CTNNB1/NOTCH2/TGFB1/MYC/BGLAP/CREB1/IL4/NME1/CSF1/CASP8/IL17A/MTOR/LYN/FOS/IFNG/LTF/TLR4/CEBPB/CCL3/JUN/PRKCA/ADIPOQ	25	BP
GO:0009896	positive regulation of catabolic process	43/415	392/17910	1.94083276972508e-17	2.37504774448045e-16	9.04702637044157e-17	IGF1/APOE/PTK2/GPD1/EZR/NFE2L2/TNF/EGF/LDLR/WNT5A/PCSK9/VCP/TNFAIP3/FOXO1/GCLC/HMOX1/INS/MDM2/IL4/SCT/SIRT1/IL1B/CPT1A/TWIST1/PTEN/AXIN1/TSC2/SMAD7/ADRB2/IL6/HSP90AA1/PRKAA2/PPARA/FABP1/IFNG/CAV1/TNFRSF1B/MAPK3/CD81/HIF1A/INSR/AKT1/BAX	43	BP
GO:0045121	membrane raft	38/415	309/18675	8.90512119529824e-18	2.45084422461904e-16	1.38976948631428e-16	EZR/TNF/ITGB1/SHH/JAK2/TNFRSF1A/PTGS2/CTNNB1/ACE2/PTPRC/CD14/ANXA2/HMOX1/MAPK1/EGFR/IKBKB/SRC/TLR2/NOS1/FAS/CD36/CASP8/CDH2/KRAS/SELE/SCARB1/CASP3/PECAM1/LYN/CDH1/ICAM1/CAV1/TNFRSF1B/MAPK3/ABCB4/NOS3/INSR/TGFBR2	38	CC
GO:0031327	negative regulation of cellular biosynthetic process	90/415	1499/17910	2.00958605010181e-17	2.45527325835173e-16	9.35262121217157e-17	EDN1/EP300/SEMA4D/FGFR1/LEP/BRCA1/ELANE/FOXP3/BIRC5/GCK/EZR/HSPA8/NR1I3/BMP6/PPARGC1A/SNAI1/TNF/CREBBP/SHH/SFTPD/WNT5A/BMP7/CTNNB1/CCND1/ESR1/TYMS/VEGFA/TGFB1/MYC/NKX2-1/FOXO1/STAT1/GCLC/IGFBP5/MMP12/PTPRC/EIF2AK2/INS/SMAD2/BRCA2/IL10/MDM2/CREB1/PDGFA/IL4/SRC/TP53/NFKB1/SIRT1/HAMP/SREBF1/TWIST1/EPO/HMGB1/IRF1/RXRA/SMAD3/APOC3/IFNA2/EZH2/CD36/PPARG/CALCA/NR3C1/SMAD7/PDGFB/CALR/PCNA/NR1H2/STAT3/SMA…	90	BP
GO:0043200	response to amino acid	24/415	106/17910	2.01745104911503e-17	2.46097004959508e-16	9.37432141618863e-17	MMP2/EDN1/COL1A1/ASS1/ALAD/GSTP1/PPARGC1A/TNF/GCLC/EGFR/CREB1/COL1A2/MTHFR/RHOA/MTOR/PCNA/CHUK/ARG1/CASP3/COL3A1/LYN/ICAM1/RELA/CEBPB	24	BP
GO:0046427	positive regulation of JAK-STAT cascade	22/415	85/17910	2.03714443885395e-17	2.4771289576887e-16	9.43587389149373e-17	IGF1/LEP/IL5/AGT/TNF/JAK2/TNFRSF1A/F2/IL13/IL10/IL4/CCL5/EPO/IFNA2/STAT3/IL6/PECAM1/LYN/IL2/IFNG/NOTCH1/CSF2	22	BP
GO:0070542	response to fatty acid	22/415	85/17910	2.03714443885395e-17	2.4771289576887e-16	9.43587389149373e-17	EDN1/ASS1/ALAD/PPARGC1A/LDLR/PTGS2/CCR7/CREB1/SRC/LPL/CAT/CLDN1/CPT1A/SREBF1/TLR2/NME1/CD36/PPARG/PRKAA2/NR1H4/AKT1/ADIPOQ	22	BP
GO:0098857	membrane microdomain	38/415	310/18675	9.94716280077303e-18	2.62356418870389e-16	1.48771162941386e-16	EZR/TNF/ITGB1/SHH/JAK2/TNFRSF1A/PTGS2/CTNNB1/ACE2/PTPRC/CD14/ANXA2/HMOX1/MAPK1/EGFR/IKBKB/SRC/TLR2/NOS1/FAS/CD36/CASP8/CDH2/KRAS/SELE/SCARB1/CASP3/PECAM1/LYN/CDH1/ICAM1/CAV1/TNFRSF1B/MAPK3/ABCB4/NOS3/INSR/TGFBR2	38	CC
GO:1902532	negative regulation of intracellular signal transduction	51/415	550/17910	2.25348159882624e-17	2.73586194107104e-16	1.04214389728707e-16	XDH/HSPB1/SOD2/MET/APOE/BCL2/EZR/PKHD1/GSTP1/NFE2L2/SNAI1/ITGB1/PTGS2/BMP7/ESR1/MYC/TNFAIP3/FOXO1/STAT1/PTPRC/HMGCR/INS/MDM2/SRC/SIRT1/IL1B/TWIST1/EPO/TGFB2/PTEN/NLRP3/PKD2/CASP8/TSC2/RHOA/MTOR/SMAD4/PRKAA2/LYN/DDIT3/CXCL12/CAV1/SH2B3/RELA/HIF1A/NR1H4/TLR4/AKT1/MIF/MMP9/ADIPOQ	51	BP
GO:0050767	regulation of neurogenesis	61/415	768/17910	2.34861404754968e-17	2.8468610339778e-16	1.0844256460627e-16	CXCR4/EP300/SEMA4D/FGFR1/DGUOK/APOE/PTK2/BCL2/AGT/RARB/TCF4/FN1/NFE2L2/BMP6/TNF/LDLR/SHH/SPP1/F2/WNT5A/BMP7/B2M/AGER/CTNNB1/VEGFA/TGFB1/TUBB2B/MDM2/CREB1/TERT/TP53/IL1B/TLR2/NME1/EPO/HGF/PTEN/NOS1/EZH2/CSF1/CDH2/PPARG/RHOA/MTOR/VIM/CALR/STAT3/IL6/COL3A1/LYN/IL2/HSPA5/CXCL12/TNFRSF1B/RELA/HIF1A/AKT1/LTA/CCL3/NOTCH1/S100A9	61	BP
GO:0010718	positive regulation of epithelial to mesenchymal transition	18/415	50/17910	2.35392451012126e-17	2.8488047024066e-16	1.08516602779067e-16	COL1A1/SNAI1/BMP7/CTNNB1/TGFB1/SMAD2/IL1B/TWIST1/TGFB2/SMAD3/EZH2/MTOR/SMAD4/IL6/ENG/TGFB3/TGFBR2/NOTCH1	18	BP
GO:0046683	response to organophosphorus	26/415	130/17910	2.42324997559497e-17	2.92809372051059e-16	1.11536878221278e-16	COL1A1/GPD1/ASS1/EZR/PTGS2/TYMS/STAT1/IGFBP5/SOD1/IL1B/REN/AGXT/SREBF1/NME1/PTEN/PKD2/THBD/NOX4/PIK3CG/FOS/HSPA5/HSP90B1/RELA/CFTR/SPARC/ADIPOQ	26	BP
GO:0030098	lymphocyte differentiation	39/415	325/17910	3.04244081020311e-17	3.67051140132039e-16	1.39817035332973e-16	EP300/LEP/FOXP3/BCL2/ITGB1/SHH/B2M/CTNNB1/NOTCH2/TGFB1/CCR7/CR1/PTPRC/IL10/MMP14/SOD1/IL4/TP53/HMGB1/IL12RB1/IRF1/NLRP3/IFNA2/RHOA/MTOR/SMAD7/ATG5/STAT3/ADA/IL6/CD80/IL2/IFNG/VCAM1/TGFBR2/TLR9/IFNB1/BAX/CD40LG	39	BP
GO:0006909	phagocytosis	38/415	308/17910	3.0928348051551e-17	3.72546010620955e-16	1.41910140127641e-16	LEP/C3/PTK2/CRP/TNF/ITGB1/LDLR/SFTPD/TGFB1/SLC11A1/PTPRC/CD14/MAPK1/SOD1/SRC/IL1B/TLR2/HMGB1/PTEN/TGM2/CD36/LBP/PPARG/GSN/CALR/ATG5/PTX3/SCARB1/CCL2/HSP90AA1/PECAM1/LYN/PIK3CA/MAPK3/ACTB/TLR4/APOA1/ADIPOQ	38	BP
GO:1903507	negative regulation of nucleic acid-templated transcription	76/415	1137/17910	3.14027451551867e-17	3.77668382656666e-16	1.43861352897742e-16	EDN1/EP300/SEMA4D/FGFR1/LEP/BRCA1/ELANE/FOXP3/BIRC5/EZR/HSPA8/NR1I3/BMP6/SNAI1/TNF/CREBBP/SHH/WNT5A/BMP7/CTNNB1/CCND1/ESR1/VEGFA/TGFB1/MYC/NKX2-1/FOXO1/STAT1/GCLC/MMP12/SMAD2/MDM2/CREB1/IL4/SRC/TP53/NFKB1/SIRT1/HAMP/SREBF1/TWIST1/EPO/HMGB1/IRF1/RXRA/SMAD3/IFNA2/EZH2/CD36/PPARG/CALCA/NR3C1/SMAD7/PDGFB/CALR/PCNA/NR1H2/STAT3/SMAD4/VDR/PPARA/IGF2/DDIT3/IFNG/CAV1/HNF4A/RELA/NR1H4/TXN/NR1I2/CDKN2A/CEBP…	76	BP
GO:0001959	regulation of cytokine-mediated signaling pathway	29/415	170/17910	3.16556073244542e-17	3.80114597325673e-16	1.44793164423203e-16	EDN1/GSTP1/TNF/JAK2/TNFRSF1A/WNT5A/TNFAIP3/STAT1/MMP12/PTPRC/IKBKB/CCL5/PTPN11/CSF1/CASP8/PPARG/CHUK/NR1H2/ARG1/IL6/RBCK1/IFNG/CAV1/SH2B3/HIF1A/NR1H4/JAK1/APOA1/ADIPOQ	29	BP
GO:0043542	endothelial cell migration	36/415	275/17910	3.20428651872857e-17	3.841644601627e-16	1.46335837237608e-16	EDN1/HSPB1/FGFR1/MET/APOE/PTK2/AGT/NFE2L2/ITGB1/WNT5A/PTGS2/VEGFA/TGFB1/HMOX1/APOH/SIRT1/AGTR2/HMGB1/PTEN/PPARG/RHOA/PDGFB/CALR/SCARB1/PECAM1/SP1/PIK3CA/FGF2/GLUL/HIF1A/NOS3/AKT1/SPARC/APOA1/NOTCH1/PRKCA	36	BP
GO:0044087	regulation of cellular component biogenesis	66/415	891/17910	3.39491205417313e-17	4.0638472174954e-16	1.54799974137653e-16	EDN1/EP300/SEMA4D/MET/BRCA1/APOE/PTK2/EZR/IL5/AGT/HSPA8/SNAI1/TNF/TNFRSF1A/WNT5A/BMP7/CTNNB1/ESR1/ACE2/VEGFA/TGFB1/VCP/MMP1/CCR7/EIF2AK2/CCL11/INS/MMP3/MMP14/IKBKB/CREB1/BBS4/SRC/TP53/CLDN1/ALB/TLR2/TWIST1/HMGB1/PTEN/PTPN11/SMAD3/CD36/RHOA/MTOR/RAF1/GSN/ELN/CSF3/ATG5/NOX4/SMAD4/HSP90AA1/ACE/PRKAA2/TGFB3/IFNG/ICAM1/CAV1/TLR4/APOA1/JUN/NOTCH1/BAX/PRKCA/CSF2	66	BP
GO:1902679	negative regulation of RNA biosynthetic process	76/415	1139/17910	3.46402133768233e-17	4.14012503578363e-16	1.57705547026186e-16	EDN1/EP300/SEMA4D/FGFR1/LEP/BRCA1/ELANE/FOXP3/BIRC5/EZR/HSPA8/NR1I3/BMP6/SNAI1/TNF/CREBBP/SHH/WNT5A/BMP7/CTNNB1/CCND1/ESR1/VEGFA/TGFB1/MYC/NKX2-1/FOXO1/STAT1/GCLC/MMP12/SMAD2/MDM2/CREB1/IL4/SRC/TP53/NFKB1/SIRT1/HAMP/SREBF1/TWIST1/EPO/HMGB1/IRF1/RXRA/SMAD3/IFNA2/EZH2/CD36/PPARG/CALCA/NR3C1/SMAD7/PDGFB/CALR/PCNA/NR1H2/STAT3/SMAD4/VDR/PPARA/IGF2/DDIT3/IFNG/CAV1/HNF4A/RELA/NR1H4/TXN/NR1I2/CDKN2A/CEBP…	76	BP
GO:1903035	negative regulation of response to wounding	22/415	87/17910	3.51144661729036e-17	4.1902899462541e-16	1.59616427634594e-16	EDN1/APOE/SPP1/F2/AGER/HMGCR/PLAT/APOH/PDGFA/PLG/CDKN1A/PLAU/PTEN/SMAD3/THBD/PDGFB/VTN/CD34/FGF2/SH2B3/NOS3/SERPINE1	22	BP
GO:0072132	mesenchyme morphogenesis	18/415	51/17910	3.56143305228003e-17	4.24335085376311e-16	1.61637622495157e-16	FGFR1/ACTC1/SNAI1/WNT5A/BMP7/MYC/EXOC4/SMAD2/MDM2/TWIST1/TGFB2/SMAD3/SMAD4/ENG/NOS3/TGFBR2/ACTA2/NOTCH1	18	BP
GO:0014074	response to purine-containing compound	27/415	145/17910	3.97856856289844e-17	4.73301848388151e-16	1.80290030526651e-16	COL1A1/GPD1/ASS1/EZR/PPARGC1A/PTGS2/STAT1/IGFBP5/SOD1/IL1B/REN/AGXT/SREBF1/NME1/PTEN/PKD2/PPARG/THBD/NOX4/PIK3CG/FOS/HSPA5/HSP90B1/RELA/CFTR/SPARC/ADIPOQ	27	BP
GO:0002285	lymphocyte activation involved in immune response	28/415	158/17910	3.99952104015304e-17	4.75059029267018e-16	1.80959375460272e-16	FOXP3/HSPD1/NOTCH2/TGFB1/SLC11A1/PTPRC/IL10/LGALS3/IL4/TP53/HAVCR2/HMGB1/IL12RB1/NLRP3/MTOR/SMAD7/STAT3/TFRC/ADA/IL6/CD80/IL2/IFNG/ICAM1/CD81/TLR4/IFNB1/CD40LG	28	BP
GO:1904705	regulation of vascular smooth muscle cell proliferation	22/415	88/17910	4.58347255824782e-17	5.41907486309762e-16	2.06423274242708e-16	MMP2/EDN1/IGF1/SOD2/AGT/GSTP1/TNF/JAK2/IGFBP5/HMOX1/IL10/MDM2/TERT/CDKN1A/PTEN/PPARG/PDGFB/TGFB3/FGF2/JUN/MMP9/ADIPOQ	22	BP
GO:1904894	positive regulation of STAT cascade	22/415	88/17910	4.58347255824782e-17	5.41907486309762e-16	2.06423274242708e-16	IGF1/LEP/IL5/AGT/TNF/JAK2/TNFRSF1A/F2/IL13/IL10/IL4/CCL5/EPO/IFNA2/STAT3/IL6/PECAM1/LYN/IL2/IFNG/NOTCH1/CSF2	22	BP
GO:1990874	vascular smooth muscle cell proliferation	22/415	88/17910	4.58347255824782e-17	5.41907486309762e-16	2.06423274242708e-16	MMP2/EDN1/IGF1/SOD2/AGT/GSTP1/TNF/JAK2/IGFBP5/HMOX1/IL10/MDM2/TERT/CDKN1A/PTEN/PPARG/PDGFB/TGFB3/FGF2/JUN/MMP9/ADIPOQ	22	BP
GO:0043086	negative regulation of catalytic activity	60/415	756/17910	4.60391173833395e-17	5.4348789107675e-16	2.07025281660712e-16	HSPB1/SEMA4D/UGT1A1/BIRC5/APOE/C3/GSTP1/HP/TNF/XIAP/PTGS2/BMP7/VEGFA/IL13/TNFAIP3/CR1/PTPRC/HMGCR/ANXA2/INS/MDM2/IKBKB/LGALS3/BBS4/SRC/TP53/CDKN1A/NFKB1/SIRT1/IL1B/HGF/TGFB2/PTEN/NOS1/APOC3/CASP8/TSC2/PPARG/RAF1/SMAD7/SLPI/VTN/PTX3/AIP/ANXA5/CASP3/LYN/FABP1/CAV1/LTF/SH2B3/NOS3/SERPINE1/TLR9/AKT1/APOA1/CDKN2A/NOTCH1/MMP9/ADIPOQ	60	BP
GO:0002460	adaptive immune response based on somatic recombination of immune receptors built from immunoglobulin superfamily domains	37/415	295/17910	4.77519043854743e-17	5.62842615341058e-16	2.14397878747181e-16	FOXP3/AIRE/C3/HSPD1/TNF/B2M/AGER/TGFB1/SLC11A1/TNFAIP3/CR1/PTPRC/IL10/IL4/IL1B/HAVCR2/HMGB1/IL12RB1/NLRP3/IFNA2/MTOR/SMAD7/STAT3/ARG1/TFRC/ADA/IL6/CD80/IL2/ICAM1/TNFRSF1B/CD81/TLR4/LTA/IFNB1/CD274/CD40LG	37	BP
GO:0051146	striated muscle cell differentiation	35/415	263/17910	5.32207350194444e-17	6.26342034646907e-16	2.38586062850125e-16	EDN1/IGF1/BCL2/ACTC1/AGT/RARB/PDGFRB/ITGB1/KRT8/SHH/VEGFA/TGFB1/IGFBP5/MMP14/CXCL10/HAMP/AGTR2/RXRA/NOS1/EZH2/CDH2/KRAS/MTOR/MAPK14/CALR/ATG5/CHUK/NOX4/SMAD4/CASP3/PPARA/IGF2/CD81/AKT1/NOTCH1	35	BP
GO:0035821	modification of morphology or physiology of other organism	28/415	160/17910	5.63994537042143e-17	6.62736699872916e-16	2.52449510303267e-16	EP300/NOS2/ELANE/APOE/HSPA8/SFTPD/F2/TYMS/TGFB1/ANXA2/EIF2AK2/PLG/CCL5/HAMP/RXRA/SMAD3/CASP8/ARG1/SLPI/CAMP/PTX3/SP1/IFNG/LTF/INSR/CCL3/JUN/S100A9	28	BP
GO:0090066	regulation of anatomical structure size	45/415	442/17910	5.89601076901421e-17	6.91768591753805e-16	2.63508331838144e-16	EDN1/SOD2/SEMA4D/LEP/APOE/EDNRA/EZR/AGT/CRP/FN1/SPP1/WNT5A/PTGS2/ACE2/VEGFA/GCLC/CCR7/HMGCR/CCL11/HMOX1/INS/EGFR/SOD1/CREB1/BBS4/SCT/HBB/AGTR2/PTEN/NOS1/RHOA/MTOR/GSN/ELN/CSF3/ATG5/AGTR1/ACE/CXCL12/ICAM1/CAV1/NOS3/AKT1/ACTA2/KCNN4	45	BP
GO:2001237	negative regulation of extrinsic apoptotic signaling pathway	23/415	100/17910	6.54259438192661e-17	7.66460942455884e-16	2.91960124777566e-16	IGF1/BRCA1/BCL2/GSTP1/TNF/IL1A/TNFAIP3/GCLC/HMOX1/LGALS3/TERT/SRC/IL1B/HGF/FAS/CASP8/RAF1/ICAM1/RELA/NOS3/SERPINE1/AKT1/CSF2	23	BP
GO:0002758	innate immune response-activating signal transduction	37/415	298/17910	6.68288043945594e-17	7.81703746989633e-16	2.9776641035211e-16	EP300/HSPD1/IRF3/CREBBP/SFTPD/XIAP/ESR1/PSMB8/TNFAIP3/CD14/IKBKB/TLR7/SRC/NFKB1/NFKBIA/NOD2/TLR2/HAVCR2/HMGB1/IRF1/CD36/LBP/CASP8/KRAS/RAF1/CHUK/S100A8/LYN/CAV1/LTF/HSP90B1/RELA/NR1H4/TLR4/TLR9/MUC5AC/S100A9	37	BP
GO:0098589	membrane region	38/415	321/18675	3.26397483173586e-17	8.26438427395521e-16	4.68638070577654e-16	EZR/TNF/ITGB1/SHH/JAK2/TNFRSF1A/PTGS2/CTNNB1/ACE2/PTPRC/CD14/ANXA2/HMOX1/MAPK1/EGFR/IKBKB/SRC/TLR2/NOS1/FAS/CD36/CASP8/CDH2/KRAS/SELE/SCARB1/CASP3/PECAM1/LYN/CDH1/ICAM1/CAV1/TNFRSF1B/MAPK3/ABCB4/NOS3/INSR/TGFBR2	38	CC
GO:0042102	positive regulation of T cell proliferation	22/415	90/17910	7.72294389152909e-17	9.01988203744697e-16	3.43585137775434e-16	IGF1/LEP/FOXP3/SHH/AGER/PTPRC/IL4/CCL5/IL1B/HAVCR2/EPO/HMGB1/IL12RB1/TFRC/IL6/IGF2/IL2/CD81/VCAM1/TGFBR2/CD274/CD40LG	22	BP
GO:0110110	positive regulation of animal organ morphogenesis	21/415	80/17910	8.04318380115668e-17	9.37964605643234e-16	3.57289260458697e-16	EDN1/FGFR1/AGT/BMP7/CTNNB1/VEGFA/TGFB1/MYC/TNFAIP3/AGTR2/TWIST1/TGFB2/CSF1/SMAD4/VDR/CD34/ENG/FGF7/TGFBR2/NOTCH1/BAX	21	BP
GO:0010638	positive regulation of organelle organization	52/415	591/17910	9.92252391981079e-17	1.15537267157191e-15	4.40104290605962e-16	EDN1/IGF1/MET/BRCA1/FOXP3/BCL2/IL5/HPS4/PPARGC1A/PDGFRB/TNF/EGF/IL1A/WNT5A/CTNNB1/VEGFA/TGFB1/CCR7/ANXA2/CCL11/INS/MAPK1/BBS4/MAPK8/SRC/TP53/SIRT1/IL1B/SREBF1/NOS1/SMAD3/CASP8/RHOA/MTOR/GSN/PDGFB/CSF3/NOX4/ADRB2/SMAD4/DKC1/TGFB3/IGF2/ICAM1/MAPK3/HIF1A/INSR/NAF1/APOA1/BAX/CSF2/MMP9	52	BP
GO:0035296	regulation of tube diameter	25/415	125/17910	1.00852692949692e-16	1.17077484187067e-15	4.45971281750823e-16	EDN1/SOD2/LEP/APOE/EDNRA/AGT/CRP/PTGS2/ACE2/HMGCR/HMOX1/INS/EGFR/SOD1/AGTR2/NOS1/RHOA/ATG5/AGTR1/ACE/ICAM1/CAV1/NOS3/AKT1/ACTA2	25	BP
GO:0097746	regulation of blood vessel diameter	25/415	125/17910	1.00852692949692e-16	1.17077484187067e-15	4.45971281750823e-16	EDN1/SOD2/LEP/APOE/EDNRA/AGT/CRP/PTGS2/ACE2/HMGCR/HMOX1/INS/EGFR/SOD1/AGTR2/NOS1/RHOA/ATG5/AGTR1/ACE/ICAM1/CAV1/NOS3/AKT1/ACTA2	25	BP
GO:0007417	central nervous system development	67/415	935/17910	1.01885437600468e-16	1.18097977067812e-15	4.49858540869891e-16	CXCR4/FGFR1/LEP/C3/PTK2/BCL2/RARB/GSTP1/PPARGC1A/TNF/EGF/ITGB1/LDLR/SHH/F2/WNT5A/BMP7/AGER/CTNNB1/TGFB1/NKX2-1/BRCA2/MAPK1/EGFR/CREB1/BBS4/SCT/SRC/TP53/IL1B/TLR2/NME1/AGTR2/PTEN/PKD1/PKD2/PTPN11/EZH2/CXCR2/CDH2/KRAS/PPARG/RHOA/MTOR/GSN/VIM/STAT3/VTN/S100A8/IL6/HSP90AA1/CASP3/COL3A1/ENG/LYN/CDH1/HSPA5/CXCL12/TNFRSF1B/MAPK3/HIF1A/ACTB/TLR4/TGFBR2/AKT1/NOTCH1/BAX	67	BP
GO:0045089	positive regulation of innate immune response	41/415	373/17910	1.05339643030233e-16	1.21917945284238e-15	4.64409554957322e-16	EP300/HSPD1/IRF3/CREBBP/SFTPD/XIAP/WNT5A/ESR1/PSMB8/TNFAIP3/MMP12/CD14/IKBKB/TLR7/SRC/CCL5/NFKB1/NFKBIA/NOD2/TLR2/HAVCR2/HMGB1/IRF1/CD36/LBP/CASP8/KRAS/RAF1/CHUK/S100A8/LYN/CAV1/LTF/HSP90B1/RELA/NR1H4/TLR4/TLR9/MUC5AC/IFNB1/S100A9	41	BP
GO:1903557	positive regulation of tumor necrosis factor superfamily cytokine production	21/415	81/17910	1.06299316330697e-16	1.22843646015249e-15	4.67935732039049e-16	HSPB1/LEP/JAK2/WNT5A/AGER/PTPRC/CD14/MMP8/LPL/NOD2/TLR2/HAVCR2/TWIST1/PTPN11/CD36/LBP/IFNG/TLR4/TLR9/MIF/CCL3	21	BP
GO:1901215	negative regulation of neuron death	31/415	207/17910	1.1663611840237e-16	1.34586872360693e-15	5.12668002650532e-16	SOD2/APOE/BCL2/PPARGC1A/JAK2/CTNNB1/IL13/GCLC/HMOX1/IL10/SOD1/CREB1/TERT/SIRT1/EPO/CSF1/KRAS/RHOA/CSF3/STAT3/CCL2/CD34/PPARA/TGFB3/PIK3CA/TNFRSF1B/HIF1A/AKT1/CEBPB/JUN/BAX	31	BP
GO:0046883	regulation of hormone secretion	34/415	254/17910	1.26296858279174e-16	1.45515945408614e-15	5.54299002405719e-16	EDN1/NOS2/FGFR1/LEP/GNAS/GCK/TFR2/AGT/BMP6/TNF/JAK2/SPP1/HMGCR/INS/EGFR/CREB1/CCL5/IL1B/REN/CPT1A/SREBF1/AGTR2/PTPN11/AGTR1/SMAD4/RBP4/IFNG/GLUL/HNF4A/HIF1A/CFTR/NR1H4/PRKCA/ADIPOQ	34	BP
GO:0007565	female pregnancy	30/415	193/17910	1.28370042114638e-16	1.47683199648352e-15	5.62554502238903e-16	MMP2/MMP7/LEP/BCL2/AGT/ABCC2/SPP1/PTGS2/ESR1/TGFB1/IGFBP5/MAPK1/SOD1/IL1B/HAVCR2/EPO/RXRA/KRAS/CALCA/THBD/MTOR/CALR/ARG1/VDR/TGFB3/FOS/MAPK3/TGFBR2/AKT1/MMP9	30	BP
GO:0071887	leukocyte apoptotic process	23/415	103/17910	1.32133352270633e-16	1.51785472675608e-15	5.78180871158258e-16	IRF3/WNT5A/CCR7/IL10/LGALS3/CCL5/TP53/SIRT1/NOD2/PTEN/CXCR2/ADA/IL6/CASP3/LYN/IL2/CXCL12/HIF1A/AKT1/MIF/CDKN2A/CD274/BAX	23	BP
GO:0035265	organ growth	29/415	179/17910	1.33672038322272e-16	1.53323823060695e-15	5.84040751884113e-16	EDN1/IGF1/FGFR1/LEP/PTK2/BCL2/AGT/RARB/PDGFRB/SHH/ESR1/SMAD2/MAPK1/SOD1/HAMP/AGTR2/TGFB2/PTEN/RXRA/PTPN11/MTOR/MAPK14/PPARA/RBP4/FGF7/FGF2/TGFBR2/AKT1/NOTCH1	29	BP
GO:0043168	anion binding	130/412	2573/16967	1.9518969319629e-17	1.53354111020438e-15	9.70633270295107e-16	ABCA3/XDH/ABCB7/MMP7/NOS2/FGFR1/MET/UGT1A1/ELANE/DGUOK/GNAS/APOE/HSPD1/PTK2/GCK/GUCY2C/ASS1/ACTC1/HSPA8/GSTP1/FN1/ATP7B/PDGFRB/ABCC2/JAK2/F2/WNT5A/BMP7/CBS/TYMS/VEGFA/VCP/GPT/GCLC/SLC22A5/PTPRC/HMGCR/ANXA2/ABCD3/EIF2AK2/PNPLA3/ACADM/GSTM1/MAPK1/EGFR/IKBKB/APOH/MAPK8/CETP/SRC/GFER/CXCL10/TP53/LPL/ABCB11/HADHA/ABCC1/AGXT/ALAS2/ALB/NOD2/NME1/HMGB1/NLRP3/FASN/FARSB/TGM2/RXRA/NOS1/MTHFR/APOC3/KRAS/PPA…	130	MF
GO:0008134	transcription factor binding	53/412	564/16967	1.97694065772204e-17	1.53354111020438e-15	9.70633270295107e-16	EP300/BRCA1/FOXP3/BCL2/RARB/TCF4/NFE2L2/PPARGC1A/CREBBP/CTNNB1/CCND1/ESR1/MYC/FOXO1/STAT1/SMAD2/MAPK1/CREB1/BBS4/TERT/SRC/TP53/NFKB1/SIRT1/NFKBIA/AGTR2/TWIST1/HMGB1/NLRP3/RXRA/SMAD3/PPARG/MTOR/MAPK14/CALR/PCNA/STAT3/SMAD4/AIP/VDR/CD34/PPARA/SP1/DDIT3/FOS/HNF4A/RELA/HIF1A/NR1H4/ACTB/CDKN2A/CEBPB/JUN	53	MF
GO:0032675	regulation of interleukin-6 production	26/415	139/17910	1.37407180394511e-16	1.57373201390733e-15	5.99465634445268e-16	FOXP3/HSPD1/TNF/WNT5A/AGER/TNFAIP3/MMP8/IL10/LPL/IL1B/NOD2/TLR2/HAVCR2/TWIST1/HGF/HMGB1/PTPN11/CD36/LBP/IL17A/STAT3/IL6/NR1H4/TLR4/TLR9/CEBPB	26	BP
GO:0051403	stress-activated MAPK cascade	35/415	271/17910	1.38089402293344e-16	1.57919204854813e-15	6.01545469576737e-16	XDH/EDN1/LEP/EZR/AGT/GSTP1/TNF/WNT5A/AGER/VEGFA/MYC/FOXO1/CCR7/HMGCR/EIF2AK2/MMP8/MAPK1/EGFR/IKBKB/MAPK8/NFKB1/IL1B/NOD2/HGF/HMGB1/TGFB2/AXIN1/FAS/MAPK14/CHUK/MAPK3/TLR4/TLR9/AKT1/CD40LG	35	BP
GO:0030168	platelet activation	27/415	152/17910	1.39052859394852e-16	1.58784728744344e-15	6.04842421173195e-16	HSPB1/MPL/COL1A1/GNAS/APOE/F2/MAPK1/PDGFA/SRC/HBB/COL1A2/PTPN11/THBD/RAF1/PDGFB/IL6/COL3A1/LYN/PIK3CG/PIK3CA/MAPK3/SH2B3/NOS3/ACTB/TLR4/PRKCA/CD40LG	27	BP
GO:0009743	response to carbohydrate	32/415	224/17910	1.51118604513236e-16	1.72306598766204e-15	6.56349897159626e-16	LEP/GCK/GSTP1/PPARGC1A/PTGS2/AGER/TGFB1/GCLC/HMGCR/SMAD2/LPL/CAT/IL1B/SREBF1/NME1/PTEN/RHOA/RAF1/NOX4/CASP3/PRKAA2/LYN/PIK3CA/GLUL/ICAM1/HNF4A/HIF1A/CFTR/NR1H4/TGFBR2/SPARC/ADIPOQ	32	BP
GO:0042692	muscle cell differentiation	40/415	359/17910	1.58800068780922e-16	1.80796819049094e-15	6.88690824607788e-16	EDN1/IGF1/SOD2/BCL2/ACTC1/AGT/RARB/PDGFRB/ITGB1/KRT8/SHH/CTNNB1/VEGFA/TGFB1/IGFBP5/MMP14/CXCL10/SIRT1/HAMP/AGTR2/RXRA/NOS1/EZH2/CDH2/KRAS/MTOR/MAPK14/PDGFB/CALR/ATG5/CHUK/NOX4/SMAD4/CASP3/ENG/PPARA/IGF2/CD81/AKT1/NOTCH1	40	BP
GO:0010039	response to iron ion	15/415	33/17910	1.64431368970044e-16	1.86931223451892e-15	7.12057983658818e-16	BCL2/TF/ALAD/TFR2/CYP1A1/BMP6/B2M/CCND1/HMOX1/MDM2/CPOX/HAMP/SLC40A1/SLC11A2/HIF1A	15	BP
GO:0032722	positive regulation of chemokine production	18/415	55/17910	1.68932947749556e-16	1.91765096522207e-15	7.30471161768665e-16	TNF/WNT5A/AGER/EIF2AK2/HMOX1/TLR7/LPL/IL1B/TLR2/HAVCR2/TWIST1/LBP/IL6/HIF1A/TLR4/TLR9/MIF/ADIPOQ	18	BP
GO:0009314	response to radiation	44/415	435/17910	1.70811011863669e-16	1.93611006810073e-15	7.37502598964233e-16	EP300/BRCA1/ELANE/BCL2/ALAD/CREBBP/ITGB1/PTGS2/CCND1/TGFB1/MYC/PTPRC/HMGCR/CCL11/BRCA2/MDM2/EGFR/CREB1/MAPK8/CXCL10/FECH/TP53/CDKN1A/CAT/SIRT1/HAMP/KRAS/THBD/MTOR/MAPK14/PCNA/NOX4/CASP3/COL3A1/FOS/HSPA5/CXCL12/ICAM1/RELA/HIF1A/VCAM1/AKT1/TXN/BAX	44	BP
GO:0044706	multi-multicellular organism process	32/415	225/17910	1.72492114554113e-16	1.95228556752335e-15	7.43664166459945e-16	MMP2/EDN1/MMP7/LEP/BCL2/CYP1A1/AGT/ABCC2/SPP1/PTGS2/ESR1/TGFB1/IGFBP5/MAPK1/SOD1/IL1B/HAVCR2/EPO/RXRA/KRAS/CALCA/THBD/MTOR/CALR/ARG1/VDR/TGFB3/FOS/MAPK3/TGFBR2/AKT1/MMP9	32	BP
GO:0032355	response to estradiol	25/415	128/17910	1.82662815113029e-16	2.06435843256415e-15	7.86354936268317e-16	UGT1A1/LEP/COL1A1/ASS1/AGT/GSTP1/PPARGC1A/PDGFRB/PTGS2/BMP7/CTNNB1/CCND1/ESR1/TGFB1/IL10/EGFR/CAT/PTEN/EZH2/CASP8/CALR/PCNA/STAT3/CASP3/CYP1A2	25	BP
GO:0051701	interaction with host	31/415	211/17910	2.03375111384739e-16	2.29506274741809e-15	8.74234770478336e-16	CXCR4/MET/ITGB1/LDLR/CTNNB1/ACE2/TYMS/TGFB1/MRC1/CR1/SLC22A5/EIF2AK2/SLC10A1/EGFR/SRC/CLDN1/RXRA/SMAD3/IFNA2/CASP8/CXCL8/GSN/PTX3/SCARB1/TFRC/CD80/CDH1/ICAM1/CAV1/CD81/INSR	31	BP
GO:0055076	transition metal ion homeostasis	23/415	105/17910	2.08199317602823e-16	2.34605829292917e-15	8.93659981869811e-16	TF/TFR2/ATP7B/BMP6/XIAP/B2M/MYC/SLC11A1/HMOX1/SOD1/ALAS2/HAMP/SLC40A1/STEAP4/SMAD4/TFRC/S100A8/SLC11A2/LTF/HIF1A/LCN2/CP/S100A9	23	BP
GO:0022408	negative regulation of cell-cell adhesion	28/415	169/17910	2.48615447322831e-16	2.797378788691e-15	1.06557688064236e-15	FOXP3/PTK2/ASS1/SHH/JAK2/SFTPD/TGFB1/IL10/LGALS3/PLG/HAVCR2/HMGB1/IRF1/IFNA2/SMAD7/ARG1/CASP3/PPARA/IL2/CDH1/CXCL12/SH2B3/AKT1/APOA1/IFNB1/CEBPB/CD274/ADIPOQ	28	BP
GO:0045926	negative regulation of growth	33/415	244/17910	2.64140030571002e-16	2.9677136475704e-15	1.13046079565706e-15	ELANE/PTK2/BCL2/AGT/TNF/SPP1/WNT5A/NOTCH2/TGFB1/IGFBP5/IL10/TP53/CDKN1A/SIRT1/AGTR2/TGFB2/PTEN/SMAD3/CD36/LBP/PPARG/MPO/CAMP/ADRB2/SMAD4/PPARA/RBP4/HNF4A/HIF1A/TGFBR2/LTA/CDKN2A/NOTCH1	33	BP
GO:1902107	positive regulation of leukocyte differentiation	26/415	143/17910	2.8436053223089e-16	3.19023458422539e-15	1.21522341933785e-15	FOXP3/GNAS/IL5/TNF/SHH/AGER/TGFB1/PTPRC/MMP14/CREB1/IL4/HMGB1/IL12RB1/NLRP3/CSF1/CASP8/RHOA/IL17A/ADA/CD80/IL2/FOS/IFNG/TGFBR2/JUN/PRKCA	26	BP
GO:0051186	cofactor metabolic process	49/415	543/17910	3.01157677980745e-16	3.37375620303502e-15	1.28513043189267e-15	IGF1/UGT1A1/GPD1/GCK/ALAD/CYP1A1/GSTP1/NFE2L2/HP/PPARGC1A/PTGS2/TYMS/VCP/GCLC/HMGCR/GGT1/HMOX1/INS/MMP3/GSTM1/EGFR/SOD1/HBB/FECH/TP53/CAT/CPOX/IDH1/ABCC1/ALAS2/FASN/MTHFR/MPO/STAT3/HSP90AA1/PRKAA2/SLC11A2/PPARA/CYP1A2/HIF1A/NOS3/GSTM3/MAT1A/INSR/AKT1/GPT2/ALDOB/GSTT1/PRSS1	49	BP
GO:0014910	regulation of smooth muscle cell migration	21/415	85/17910	3.1113802564356e-16	3.48048868569252e-15	1.3257869444798e-15	IGF1/BCL2/AGT/GSTP1/NFE2L2/PPARGC1A/PDGFRB/IGFBP5/MDM2/PDGFA/TERT/SRC/CCL5/IGFBP3/PLAU/PDGFB/NOX4/VTN/ACE/SERPINE1/ADIPOQ	21	BP
GO:0031100	animal organ regeneration	20/415	75/17910	3.15333514716759e-16	3.52229369273008e-15	1.3417112980834e-15	UGT1A1/GSTP1/CCND1/TYMS/TGFB1/HMOX1/IL10/EGFR/CDKN1A/CLDN1/HAMP/HGF/EZH2/PPARG/PCNA/VTN/CXCL12/TGFBR2/APOA1/CEBPB	20	BP
GO:0042113	B cell activation	31/415	215/17910	3.50037613750526e-16	3.90426569183278e-15	1.48721198356155e-15	EP300/FOXP3/HSPD1/BCL2/IL5/ITGB1/NOTCH2/TGFB1/IL13/TNFAIP3/PTPRC/IL10/MMP14/IL4/TP53/CDKN1A/NOD2/CASP8/TFRC/ADA/IL6/CASP3/IL2/CD81/TLR4/VCAM1/TLR9/MIF/IFNB1/BAX/CD40LG	31	BP
GO:0034284	response to monosaccharide	30/415	200/17910	3.519179047826e-16	3.91954941775983e-15	1.49303385690375e-15	LEP/GCK/GSTP1/PPARGC1A/PTGS2/AGER/TGFB1/GCLC/HMGCR/SMAD2/LPL/CAT/SREBF1/NME1/PTEN/RHOA/RAF1/NOX4/CASP3/PRKAA2/PIK3CA/GLUL/ICAM1/HNF4A/HIF1A/CFTR/NR1H4/TGFBR2/SPARC/ADIPOQ	30	BP
GO:0098805	whole membrane	89/415	1586/18675	1.64512508286343e-16	4.00524683635597e-15	2.27120507391267e-15	ABCA3/APOE/BCL2/TF/ASS1/EZR/HSPA8/GAA/TNF/EGF/ITGB1/LDLR/SHH/JAK2/TNFRSF1A/WNT5A/PTGS2/B2M/CTNNB1/ACE2/MRC1/PCSK9/SLC11A1/CR1/PTPRC/CD14/HMGCR/ANXA2/ABCD3/HMOX1/CXCR1/MAPK1/MDM2/EGFR/IKBKB/TLR7/LGALS3/HADHB/SRC/CAT/CPT1A/SREBF1/HLA-C/TLR2/NME1/PLAU/DSP/PKD1/NOS1/FAS/CD36/CXCR2/CASP8/CDH2/KRAS/RHOA/SELE/THBD/MTOR/STEAP4/RAF1/CALR/ATG5/HLA-A/ARG1/ADRB2/SCARB1/TFRC/CASP3/SLC11A2/PECAM1/LYN/CDH1/ICAM…	89	CC
GO:0008610	lipid biosynthetic process	55/415	676/17910	3.70258471864582e-16	4.11785290344329e-15	1.5685715747664e-15	EDN1/LEP/BRCA1/CYP2D6/APOE/C3/GPD1/CYP1A1/BMP6/PPARGC1A/SNAI1/TNF/LDLR/TNFRSF1A/PTGS2/CYP2C9/HMGCR/ABCD3/INS/PNPLA3/SOD1/CREB1/PDGFA/AKR1D1/LPL/ABCB11/IDH1/NFKB1/SIRT1/IL1B/SREBF1/PTEN/ALOX5/FASN/APOC3/MTOR/PDGFB/NR1H2/CYP2E1/SCARB1/VDR/PRKAA2/CYP1A2/PIK3CG/SP1/PIK3CA/IFNG/FGF2/CFTR/NR1H4/AKT1/MIF/APOA1/CYP3A4/ADIPOQ	55	BP
GO:0010558	negative regulation of macromolecule biosynthetic process	85/415	1432/17910	3.84304583324449e-16	4.26789121798901e-15	1.62572413481182e-15	EDN1/EP300/SEMA4D/FGFR1/LEP/BRCA1/ELANE/FOXP3/BIRC5/EZR/HSPA8/GSTP1/NR1I3/BMP6/SNAI1/TNF/CREBBP/SHH/SFTPD/WNT5A/BMP7/CTNNB1/CCND1/ESR1/TYMS/VEGFA/TGFB1/MYC/NKX2-1/FOXO1/STAT1/GCLC/IGFBP5/MMP12/PTPRC/EIF2AK2/SMAD2/BRCA2/IL10/MDM2/CREB1/IL4/SRC/TP53/NFKB1/SIRT1/HAMP/SREBF1/TWIST1/EPO/HMGB1/IRF1/RXRA/SMAD3/IFNA2/EZH2/CD36/PPARG/CALCA/NR3C1/SMAD7/PDGFB/CALR/PCNA/NR1H2/STAT3/SMAD4/IL6/VDR/PPARA/IGF2/D…	85	BP
GO:0150076	neuroinflammatory response	20/415	76/17910	4.1895277753783e-16	4.64191557800048e-15	1.76819740744709e-15	IGF1/TNF/LDLR/PTGS2/AGER/IL13/PTPRC/MMP3/MMP8/EGFR/TLR7/IL4/IL1B/TLR2/IL6/IFNG/TNFRSF1B/CCL3/JUN/MMP9	20	BP
GO:0042089	cytokine biosynthetic process	24/415	120/17910	4.19191855710128e-16	4.64191557800048e-15	1.76819740744709e-15	HSPB1/ELANE/FOXP3/TNF/IL1A/SFTPD/WNT5A/AGER/PTPRC/HMOX1/IL10/TLR7/IL4/NFKB1/IL1B/IRF1/LBP/STAT3/IL6/CD80/RELA/TLR4/TLR9/CEBPB	24	BP
GO:0043903	regulation of symbiosis, encompassing mutualism through parasitism	32/415	232/17910	4.26746517562549e-16	4.71877264383912e-15	1.79747378317523e-15	CXCR4/EP300/ELANE/APOE/BCL2/HSPA8/TNF/SFTPD/STAT1/ANXA2/EIF2AK2/IL10/CCL5/IFNA2/CD36/LBP/CXCL8/GSN/MPO/ARG1/SLPI/CAMP/PTX3/SP1/TOP2A/NR5A2/CAV1/LTF/LTA/IFNB1/CCL3/JUN	32	BP
GO:0006812	cation transport	70/415	1038/17910	4.43559973387319e-16	4.89764137281832e-15	1.86560841801291e-15	EDN1/CXCR4/LEP/BCL2/TF/GCK/TFR2/AGT/ATP7B/PPARGC1A/PDGFRB/EGF/ABCC2/F2/PTGS2/B2M/CTNNB1/ACE2/SCNN1B/TGFB1/PCSK9/IL13/SLC11A1/CCR7/SLC22A5/PTPRC/ANXA2/SLC10A1/LGALS3/GPR35/CXCL10/CCL5/ABCB11/SCNN1G/TWIST1/EPO/PTEN/PKD1/NOS1/PKD2/SLC40A1/RHOA/PDGFB/ATG5/ARG1/ADRB2/TFRC/CCL2/ADA/ANXA5/VDR/SLC11A2/LYN/PIK3CG/DDIT3/IFNG/FGF2/CXCL12/ICAM1/CAV1/NOS3/TLR9/SCNN1A/AKT1/CCL3/KCNN4/BAX/CP/CSF2/MMP9	70	BP
GO:0050866	negative regulation of cell activation	29/415	187/17910	4.46920366387315e-16	4.92766573269228e-15	1.87704529022597e-15	FOXP3/APOE/LDLR/SHH/SFTPD/F2/TGFB1/TNFAIP3/GCLC/PTPRC/HMOX1/IL10/LGALS3/PDGFA/HAVCR2/HMGB1/IRF1/IFNA2/THBD/SMAD7/PDGFB/ARG1/CASP3/IL2/SH2B3/NOS3/IFNB1/CEBPB/CD274	29	BP
GO:0052548	regulation of endopeptidase activity	40/415	370/17910	4.52153116711867e-16	4.97821877067436e-15	1.89630194175193e-15	XDH/BIRC5/C3/HSPD1/TNF/JAK2/XIAP/PTGS2/AGER/PSMB8/VEGFA/MYC/VCP/CR1/MDM2/SRC/SIRT1/HGF/HMGB1/NLRP3/SMAD3/FAS/CASP8/PPARG/RHOA/RAF1/GSN/STAT3/SLPI/VTN/S100A8/LYN/FABP1/LTF/SERPINE1/AKT1/F3/BAX/S100A9/MMP9	40	BP
GO:0071560	cellular response to transforming growth factor beta stimulus	32/415	233/17910	4.84343875014193e-16	5.32501098638638e-15	2.02840195228442e-15	EDN1/EP300/COL1A1/PTK2/PPARGC1A/CREBBP/WNT5A/TGFB1/NKX2-1/SMAD2/CREB1/SRC/TP53/CLDN1/SIRT1/COL1A2/TGFB2/SMAD3/RHOA/NR3C1/SMAD7/ARG1/NOX4/SMAD4/COL3A1/ENG/TGFB3/FOS/HSPA5/CAV1/TGFBR2/JUN	32	BP
GO:0003007	heart morphogenesis	33/415	249/17910	4.86884349952242e-16	5.34529461340425e-15	2.03612838679276e-15	PTK2/ACTC1/RARB/GAA/SNAI1/SHH/WNT5A/BMP7/CTNNB1/NOTCH2/VEGFA/TGFB1/MDM2/BBS4/TP53/TWIST1/TGFB2/DSP/RXRA/PKD2/SMAD3/MTOR/SMAD7/ELN/SMAD4/ENG/RBP4/HIF1A/NOS3/INSR/TGFBR2/JUN/NOTCH1	33	BP
GO:0042107	cytokine metabolic process	24/415	121/17910	5.11918231241323e-16	5.61211356218198e-15	2.1377649989971e-15	HSPB1/ELANE/FOXP3/TNF/IL1A/SFTPD/WNT5A/AGER/PTPRC/HMOX1/IL10/TLR7/IL4/NFKB1/IL1B/IRF1/LBP/STAT3/IL6/CD80/RELA/TLR4/TLR9/CEBPB	24	BP
GO:2000027	regulation of animal organ morphogenesis	33/415	250/17910	5.49209485495155e-16	6.01235740175252e-15	2.29022578971664e-15	EDN1/FGFR1/BCL2/AGT/TNF/SHH/WNT5A/BMP7/CTNNB1/ESR1/PSMB8/VEGFA/TGFB1/MYC/TNFAIP3/STAT1/PDGFA/AGTR2/TWIST1/HGF/TGFB2/RXRA/CSF1/TNFRSF11B/RHOA/SMAD4/VDR/CD34/ENG/FGF7/TGFBR2/NOTCH1/BAX	33	BP
GO:0002224	toll-like receptor signaling pathway	26/415	147/17910	5.74125159830204e-16	6.27617617822919e-15	2.39071957698255e-15	HSPD1/IRF3/SFTPD/ESR1/TNFAIP3/CD14/IKBKB/TLR7/NFKBIA/TLR2/HAVCR2/HMGB1/IRF1/CD36/LBP/CASP8/CHUK/S100A8/LYN/CAV1/LTF/HSP90B1/NR1H4/TLR4/TLR9/S100A9	26	BP
GO:0051960	regulation of nervous system development	63/415	870/17910	5.82408524463274e-16	6.35768396377878e-15	2.42176750378643e-15	CXCR4/EP300/SEMA4D/FGFR1/DGUOK/APOE/PTK2/BCL2/AGT/RARB/TCF4/FN1/NFE2L2/BMP6/TNF/EGF/LDLR/SHH/SPP1/F2/WNT5A/BMP7/B2M/AGER/CTNNB1/VEGFA/TGFB1/TUBB2B/MDM2/CREB1/TERT/TP53/IL1B/TLR2/NME1/EPO/HGF/TYMP/PTEN/NOS1/EZH2/CSF1/CDH2/PPARG/RHOA/MTOR/VIM/CALR/STAT3/IL6/COL3A1/LYN/IL2/HSPA5/CXCL12/TNFRSF1B/RELA/HIF1A/AKT1/LTA/CCL3/NOTCH1/S100A9	63	BP
GO:0033043	regulation of organelle organization	74/415	1147/17910	5.97992019361969e-16	6.51853711886061e-15	2.48303965038542e-15	EDN1/IGF1/MET/BRCA1/FOXP3/PTK2/BCL2/EZR/IL5/PKHD1/HPS4/PPARGC1A/PDGFRB/TNF/EGF/IL1A/WNT5A/BMP7/CTNNB1/NOTCH2/VEGFA/TGFB1/MYC/CCR7/ANXA2/CCL11/INS/MAPK1/PDGFA/BBS4/MAPK8/SRC/TP53/SIRT1/IL1B/SREBF1/TWIST1/HGF/PKD1/NOS1/MTHFR/SMAD3/CASP8/TSC2/CDH2/RHOA/MTOR/GSN/PDGFB/ELN/CALR/CSF3/ATG5/NOX4/ADRB2/SMAD4/DKC1/S100A8/PRKAA2/TGFB3/IGF2/CXCL12/TOP2A/ICAM1/MAPK3/HIF1A/INSR/NAF1/AKT1/APOA1/BAX/S100A9/CSF2/…	74	BP
GO:0005788	endoplasmic reticulum lumen	36/415	306/18675	2.81865212464396e-16	6.60817331444306e-15	3.74721393568651e-15	EDN1/COL1A1/APOE/C3/TF/FN1/SHH/SPP1/F2/WNT5A/PTGS2/B2M/PCSK9/IGFBP5/INS/BGLAP/PDGFA/IGFBP3/ALB/COL1A2/CSF1/CDH2/SERPINA1/MTTP/AFP/PDGFB/CALR/VTN/IL6/COL3A1/HSPA5/HSP90B1/CANX/SERPINC1/APOA1/CP	36	CC
GO:0042035	regulation of cytokine biosynthetic process	23/415	110/17910	6.20117348883527e-16	6.75014422970242e-15	2.57126337743416e-15	HSPB1/ELANE/FOXP3/TNF/IL1A/SFTPD/WNT5A/AGER/PTPRC/HMOX1/IL10/TLR7/NFKB1/IL1B/IRF1/LBP/STAT3/IL6/CD80/RELA/TLR4/TLR9/CEBPB	23	BP
GO:0002218	activation of innate immune response	37/415	319/17910	6.26511369619893e-16	6.81009883384566e-15	2.59410127136592e-15	EP300/HSPD1/IRF3/CREBBP/SFTPD/XIAP/ESR1/PSMB8/TNFAIP3/CD14/IKBKB/TLR7/SRC/NFKB1/NFKBIA/NOD2/TLR2/HAVCR2/HMGB1/IRF1/CD36/LBP/CASP8/KRAS/RAF1/CHUK/S100A8/LYN/CAV1/LTF/HSP90B1/RELA/NR1H4/TLR4/TLR9/MUC5AC/S100A9	37	BP
GO:0030001	metal ion transport	60/415	800/17910	6.38420868945857e-16	6.92975194611429e-15	2.63967950719362e-15	CXCR4/BCL2/TF/GCK/TFR2/AGT/ATP7B/PDGFRB/EGF/ABCC2/F2/PTGS2/B2M/CTNNB1/SCNN1B/TGFB1/PCSK9/IL13/SLC11A1/CCR7/SLC22A5/PTPRC/ANXA2/SLC10A1/LGALS3/GPR35/CXCL10/CCL5/ABCB11/SCNN1G/EPO/PTEN/PKD1/NOS1/PKD2/SLC40A1/RHOA/PDGFB/ATG5/ADRB2/TFRC/CCL2/ANXA5/VDR/SLC11A2/LYN/PIK3CG/DDIT3/FGF2/CXCL12/ICAM1/CAV1/NOS3/TLR9/SCNN1A/AKT1/CCL3/KCNN4/BAX/CP	60	BP
GO:1901565	organonitrogen compound catabolic process	73/415	1123/17910	6.56404899788383e-16	7.11491065567521e-15	2.71021011997846e-15	XDH/NOS2/UGT1A1/CYP2D6/ELANE/APOE/PTK2/ALAD/EZR/HSPA8/NFE2L2/CYP3A5/TNF/EGF/LDLR/SHH/WNT5A/CBS/CTNNB1/PSMB8/TGFB1/PCSK9/VCP/TNFAIP3/FOXO1/GPT/GCLC/MMP12/HMGCR/ANXA2/GGT1/HMOX1/INS/IL10/MDM2/EGFR/SIRT1/IL1B/AGXT/TYMP/PTEN/AXIN1/PKD1/NOS1/SMAD3/CASP8/MTOR/SMAD7/ARG1/SCARB1/ADA/HSP90AA1/ACE/RBCK1/DDIT3/CDH1/ITPA/IFNG/HSPA5/FGF2/GLUL/CAV1/TNFRSF1B/HSP90B1/FAH/CD81/RELA/NOS3/MAT1A/AKT1/GPT2/CYP3A4/PAH	73	BP
GO:0071674	mononuclear cell migration	19/415	68/17910	6.75489272073939e-16	7.31145782519468e-15	2.78507882229448e-15	TNF/AGER/TGFB1/LGALS3/CXCL10/CCL5/HMGB1/CSF1/CALCA/MAPK14/PDGFB/CCL2/IL6/PECAM1/LYN/CXCL12/MAPK3/SERPINE1/CCL3	19	BP
GO:0032760	positive regulation of tumor necrosis factor production	20/415	78/17910	7.29434570040277e-16	7.88425410795996e-15	3.00326824973279e-15	HSPB1/LEP/JAK2/WNT5A/AGER/PTPRC/CD14/MMP8/LPL/NOD2/TLR2/HAVCR2/TWIST1/PTPN11/CD36/LBP/TLR4/TLR9/MIF/CCL3	20	BP
GO:0007249	I-kappaB kinase/NF-kappaB signaling	33/415	253/17910	7.85423116955888e-16	8.47749530028933e-15	3.2292455473896e-15	HSPB1/IRF3/GSTP1/TNF/TNFRSF1A/WNT5A/CTNNB1/ESR1/TNFAIP3/STAT1/CCR7/CD14/HMOX1/IKBKB/TLR7/SIRT1/IL1B/NFKBIA/NOD2/TLR2/TGM2/CD36/CASP8/RHOA/CHUK/RBCK1/LTF/RELA/NR1H4/TLR4/TLR9/AKT1/ADIPOQ	33	BP
GO:0071453	cellular response to oxygen levels	32/415	237/17910	7.98288070354028e-16	8.60426903319875e-15	3.27753616838348e-15	EDN1/MPL/EP300/BCL2/NFE2L2/PPARGC1A/CREBBP/PTGS2/BMP7/PSMB8/VEGFA/MYC/FOXO1/HMOX1/MDM2/TERT/SRC/TP53/SIRT1/TWIST1/EPO/PTEN/FAS/PPARG/MTOR/CD34/FABP1/ICAM1/CAV1/HIF1A/AKT1/NOTCH1	32	BP
GO:0050769	positive regulation of neurogenesis	44/415	455/17910	9.00889308855825e-16	9.69654669265689e-15	3.6936063215805e-15	CXCR4/EP300/SEMA4D/FGFR1/APOE/BCL2/AGT/RARB/TCF4/FN1/NFE2L2/BMP6/TNF/SHH/WNT5A/BMP7/AGER/CTNNB1/VEGFA/TGFB1/TUBB2B/IL1B/TLR2/NME1/EPO/HGF/PTEN/EZH2/CSF1/PPARG/RHOA/MTOR/IL6/LYN/IL2/HSPA5/CXCL12/TNFRSF1B/RELA/HIF1A/LTA/CCL3/NOTCH1/S100A9	44	BP
GO:0030522	intracellular receptor signaling pathway	34/415	271/17910	9.2928853447198e-16	9.98822711526877e-15	3.80471316064273e-15	EP300/LEP/BRCA1/IRF3/NR1I3/PPARGC1A/JAK2/XIAP/CTNNB1/ESR1/TNFAIP3/SRC/SIRT1/NFKBIA/SREBF1/NOD2/TWIST1/AXIN1/RXRA/EZH2/CASP8/PPARG/RHOA/NR3C1/CALR/NR1H2/STAT3/VDR/PPARA/NR5A2/RELA/NR1H4/TLR4/NR1I2	34	BP
GO:0016070	RNA metabolic process	188/415	4867/17910	9.66981205443093e-16	1.03788415695952e-14	3.95350592816413e-15	EDN1/HSPB1/IGF1/EP300/SOD2/SEMA4D/FGFR1/MET/LEP/BRCA1/ELANE/COL1A1/FOXP3/BIRC5/APOE/AIRE/HSPD1/TFR2/IRF3/EZR/IL5/AGT/PKHD1/HSPA8/RARB/TCF4/NFE2L2/NR1I3/BMP6/PPARGC1A/SNAI1/TNF/EGF/IL1A/CREBBP/NOP10/SHH/JAK2/TNFRSF1A/SPP1/XIAP/WNT5A/BMP7/AGER/CTNNB1/CCND1/NOTCH2/ESR1/TYMS/PSMB8/VEGFA/TGFB1/MYC/NKX2-1/SLC11A1/TNFAIP3/FOXO1/STAT1/GCLC/MMP12/EIF2AK2/HMOX1/INS/SMAD2/BRCA2/IL10/MAPK1/MDM2/EGFR/IKBKB/CR…	188	BP
GO:0015718	monocarboxylic acid transport	25/415	137/17910	9.83751439181682e-16	1.05441141005735e-14	4.0164615024066e-15	EDN1/NOS2/LEP/APOE/ABCC2/SLCO1B1/ABCD3/SLC10A1/ABCB11/IL1B/CPT1A/AGTR2/SLCO1B3/RXRA/CD36/PPARG/CPT2/ACE/PRKAA2/PPARA/FABP1/ABCB4/NR1H4/AKT1/MIF	25	BP
GO:0034504	protein localization to nucleus	31/415	223/17910	9.99289833430006e-16	1.06957414622696e-14	4.07421936192471e-15	LEP/COL1A1/AGT/SHH/F2/PTGS2/BMP7/TGFB1/MMP12/INS/MAPK1/MDM2/BBS4/TERT/SRC/TP53/CDKN1A/NFKBIA/AGTR2/SMAD3/CD36/TSC2/MAPK14/CALR/STAT3/DKC1/CDH1/IFNG/GLUL/AKT1/TXN	31	BP
GO:0071559	response to transforming growth factor beta	32/415	239/17910	1.02080300426865e-15	1.09108081888798e-14	4.15614252964074e-15	EDN1/EP300/COL1A1/PTK2/PPARGC1A/CREBBP/WNT5A/TGFB1/NKX2-1/SMAD2/CREB1/SRC/TP53/CLDN1/SIRT1/COL1A2/TGFB2/SMAD3/RHOA/NR3C1/SMAD7/ARG1/NOX4/SMAD4/COL3A1/ENG/TGFB3/FOS/HSPA5/CAV1/TGFBR2/JUN	32	BP
GO:0010743	regulation of macrophage derived foam cell differentiation	14/415	30/17910	1.07418883693891e-15	1.14654739053827e-14	4.36742566597531e-15	AGT/CRP/CETP/LPL/NFKB1/NFKBIA/CSF1/CD36/PPARG/NR1H2/AGTR1/PPARA/CSF2/ADIPOQ	14	BP
GO:0001890	placenta development	26/415	151/17910	1.13254530569745e-15	1.20715820725172e-14	4.5983042486964e-15	LEP/PTK2/SNAI1/KRT8/SPP1/PTGS2/BMP7/IL10/MAPK1/EGFR/SOD1/PKD1/RXRA/PKD2/CASP8/PPARG/MAPK14/PDGFB/ADA/VDR/IGF2/MAPK3/HIF1A/AKT1/CEBPB/CSF2	26	BP
GO:0072511	divalent inorganic cation transport	44/415	458/17910	1.14648789817132e-15	1.22032680020036e-14	4.64846602247332e-15	CXCR4/BCL2/GCK/AGT/PDGFRB/EGF/ABCC2/F2/PTGS2/CTNNB1/TGFB1/IL13/SLC11A1/CCR7/PTPRC/ANXA2/LGALS3/GPR35/CXCL10/CCL5/EPO/PKD1/NOS1/PKD2/SLC40A1/RHOA/PDGFB/ATG5/CCL2/ANXA5/VDR/SLC11A2/LYN/PIK3CG/DDIT3/FGF2/CXCL12/ICAM1/CAV1/NOS3/TLR9/CCL3/KCNN4/BAX	44	BP
GO:0051817	modification of morphology or physiology of other organism involved in symbiotic interaction	23/415	113/17910	1.15955301289319e-15	1.23252626612506e-14	4.69493619983398e-15	EP300/ELANE/APOE/HSPA8/SFTPD/F2/TYMS/TGFB1/ANXA2/EIF2AK2/PLG/CCL5/RXRA/SMAD3/CASP8/ARG1/CAMP/PTX3/SP1/LTF/INSR/CCL3/JUN	23	BP
GO:1901615	organic hydroxy compound metabolic process	46/415	500/17910	1.27198973099842e-15	1.35017142026559e-14	5.14306984865748e-15	IGF1/FGFR1/LEP/APOE/ALDH2/BCL2/GPD1/CYP1A1/BMP6/SNAI1/TNF/LDLR/WNT5A/PCSK9/HMGCR/SOD1/IL4/AKR1D1/CETP/TP53/CAT/ABCB11/NFKB1/SIRT1/IL1B/SREBF1/AGTR2/TGFB2/PTEN/FASN/RXRA/SCARB1/VDR/PRKAA2/TTR/RBP4/SP1/IFNG/FGF2/NR5A2/HIF1A/CFTR/NR1H4/APOA1/CYP3A4/PAH	46	BP
GO:0010717	regulation of epithelial to mesenchymal transition	21/415	91/17910	1.39235547153526e-15	1.47386388412514e-14	5.61423889566415e-15	COL1A1/SNAI1/BMP7/CTNNB1/TGFB1/NKX2-1/SMAD2/IL1B/TWIST1/TGFB2/PTEN/SMAD3/EZH2/MTOR/SMAD7/SMAD4/IL6/ENG/TGFB3/TGFBR2/NOTCH1	21	BP
GO:0014909	smooth muscle cell migration	21/415	91/17910	1.39235547153526e-15	1.47386388412514e-14	5.61423889566415e-15	IGF1/BCL2/AGT/GSTP1/NFE2L2/PPARGC1A/PDGFRB/IGFBP5/MDM2/PDGFA/TERT/SRC/CCL5/IGFBP3/PLAU/PDGFB/NOX4/VTN/ACE/SERPINE1/ADIPOQ	21	BP
GO:0060341	regulation of cellular localization	62/415	863/17910	1.48425371724632e-15	1.56898071761183e-14	5.9765577176023e-15	LEP/BCL2/EZR/HPS4/TNF/EGF/ITGB1/SHH/F2/WNT5A/PTGS2/CTNNB1/TGFB1/PCSK9/IL13/HMGCR/ANXA2/HMOX1/INS/MAPK1/MMP14/MDM2/EGFR/LGALS3/MAPK8/TERT/SRC/CXCL10/TP53/IL1B/SREBF1/AGTR2/EPO/PTEN/NOS1/PKD2/PTPN11/SMAD3/CD36/CASP8/CDH2/MAPK14/GSN/ATG5/DKC1/HSP90AA1/PRKAA2/LYN/CDH1/IFNG/GLUL/CAV1/MAPK3/CD81/HIF1A/CFTR/NR1H4/ACTB/AKT1/TXN/BAX/ADIPOQ	62	BP
GO:0048037	cofactor binding	45/412	438/16967	2.2813636606478e-16	1.65170729030901e-14	1.04542489151089e-14	XDH/NOS2/CYP2D6/CYP2C19/ALDH2/GPD1/CYP1A1/GSTP1/TPMT/CYP3A5/JAK2/PTGS2/CBS/TYMS/GPT/GCLC/HMGCR/HMOX1/PNPLA3/ACADM/GSTM1/SRC/POLE/GFER/FECH/CAT/HADHA/IDH1/AGXT/ALAS2/ALB/FASN/NOS1/MTHFR/STEAP4/MPO/NOX4/CYP2E1/CYP1A2/NOS3/GSTM3/CYP2B6/LCN2/GPT2/CYP3A4	45	MF
GO:0043281	regulation of cysteine-type endopeptidase activity involved in apoptotic process	29/415	196/17910	1.61284424606759e-15	1.70256978448207e-14	6.48542488188834e-15	XDH/HSPD1/TNF/JAK2/XIAP/PTGS2/VEGFA/MYC/VCP/MDM2/SRC/SIRT1/HGF/HMGB1/NLRP3/SMAD3/FAS/CASP8/PPARG/RHOA/RAF1/GSN/S100A8/FABP1/AKT1/F3/BAX/S100A9/MMP9	29	BP
GO:0042100	B cell proliferation	19/415	71/17910	1.63906808687244e-15	1.72787904631203e-14	6.58183286346437e-15	HSPD1/BCL2/IL5/IL13/PTPRC/IL10/IL4/CDKN1A/TFRC/ADA/CASP3/IL2/CD81/TLR4/TLR9/MIF/IFNB1/BAX/CD40LG	19	BP
GO:0061448	connective tissue development	32/415	243/17910	1.65640809483834e-15	1.74376660394968e-14	6.64235171124069e-15	EDN1/FGFR1/LEP/COL1A1/GNAS/RARB/BMP6/PPARGC1A/SNAI1/PDGFRB/WNT5A/BMP7/CTNNB1/TYMS/TGFB1/BBS4/BMP1/SIRT1/PKD1/SMAD3/CSF1/MAPK14/PDGFB/CD34/PIK3CA/FGF2/MAPK3/RELA/HIF1A/NR1H4/TGFBR2/ACTA2	32	BP
GO:0072073	kidney epithelium development	25/415	140/17910	1.67323919752351e-15	1.75907568166459e-14	6.70066701463442e-15	FGFR1/BCL2/AGT/RARB/SHH/BMP7/CTNNB1/VEGFA/TGFB1/MYC/STAT1/SMAD2/UMOD/CAT/AGTR2/PKD1/PKD2/SMAD3/CXCR2/SMAD7/SMAD4/CD34/PECAM1/FGF2/ADIPOQ	25	BP
GO:0097193	intrinsic apoptotic signaling pathway	34/415	277/17910	1.81033227953761e-15	1.90060158036154e-14	7.23976714034236e-15	HSPB1/EP300/SOD2/BRCA1/BCL2/NFE2L2/SNAI1/TNF/JAK2/TNFRSF1A/PTGS2/HMOX1/INS/BRCA2/MDM2/SOD1/SRC/TP53/CDKN1A/SIRT1/EPO/S100A8/CASP3/DDIT3/CXCL12/CAV1/TNFRSF1B/HIF1A/AKT1/MIF/CEBPB/BAX/S100A9/MMP9	34	BP
GO:0002221	pattern recognition receptor signaling pathway	29/415	197/17910	1.85160591666532e-15	1.94128123732238e-14	7.39472399547105e-15	HSPD1/IRF3/SFTPD/XIAP/ESR1/TNFAIP3/CD14/IKBKB/TLR7/NFKBIA/NOD2/TLR2/HAVCR2/HMGB1/IRF1/CD36/LBP/CASP8/CHUK/S100A8/LYN/CAV1/LTF/HSP90B1/RELA/NR1H4/TLR4/TLR9/S100A9	29	BP
GO:0035051	cardiocyte differentiation	26/415	154/17910	1.8581142990386e-15	1.94545073407515e-14	7.41060643285005e-15	EDN1/IGF1/ACTC1/AGT/RARB/PDGFRB/ITGB1/BMP7/VEGFA/TGFB1/MAPK1/EGFR/HAMP/AGTR2/TWIST1/TGFB2/RXRA/MTOR/CALR/ATG5/NOX4/SMAD4/PPARA/MAPK3/VCAM1/NOTCH1	26	BP
GO:0002576	platelet degranulation	24/415	128/17910	1.96310519861374e-15	2.04979122980252e-14	7.80806000764417e-15	IGF1/TF/FN1/EGF/VEGFA/TGFB1/SOD1/APOH/PDGFA/PLG/ALB/HGF/TGFB2/CD36/SERPINA1/PDGFB/ANXA5/PECAM1/LYN/TGFB3/IGF2/SERPINE1/SPARC/APOA1	24	BP
GO:0014013	regulation of gliogenesis	24/415	128/17910	1.96310519861374e-15	2.04979122980252e-14	7.80806000764417e-15	CXCR4/TNF/LDLR/SHH/F2/AGER/CTNNB1/TGFB1/CREB1/TERT/IL1B/TLR2/EZH2/CSF1/CDH2/PPARG/MTOR/IL6/LYN/TNFRSF1B/RELA/LTA/CCL3/NOTCH1	24	BP
GO:0070555	response to interleukin-1	28/415	183/17910	2.07756186262599e-15	2.16635860438002e-14	8.25208818105103e-15	EDN1/IL1A/ABCC2/PSMB8/GCLC/IKBKB/SRC/CCL5/NFKB1/IL1B/NFKBIA/NOD2/EPO/MTHFR/CXCL8/SELE/IL17A/CHUK/CCL2/IL6/ICAM1/MAPK3/RELA/HIF1A/LCN2/CEBPB/CCL3/PRKCA	28	BP
GO:0043627	response to estrogen	19/415	72/17910	2.17984663361295e-15	2.26993514624871e-14	8.6466317045751e-15	EP300/BRCA1/PDGFRB/ABCC2/CCND1/ESR1/HMOX1/BGLAP/MAPK1/MMP14/MDM2/EPO/TNFRSF11B/PPARG/TGFB3/CAV1/GSTM3/TGFBR2/APOA1	19	BP
GO:0002702	positive regulation of production of molecular mediator of immune response	21/415	93/17910	2.23340155743965e-15	2.32255628808169e-14	8.84707603623624e-15	IL5/WNT5A/B2M/TGFB1/IL13/PTPRC/IL4/IL1B/NOD2/NLRP3/CD36/MAPK14/TFRC/IL6/RBP4/IL2/MAPK3/CD81/TLR4/TLR9/MIF	21	BP
GO:0030278	regulation of ossification	29/415	199/17910	2.43404673383927e-15	2.52779042561551e-14	9.62885343784781e-15	IGF1/SEMA4D/GNAS/PTK2/BCL2/BMP6/TNF/WNT5A/BMP7/CTNNB1/TGFB1/IGFBP5/BGLAP/MAPK1/TWIST1/HGF/TGFB2/SMAD3/CSF1/MAPK14/ADRB2/IL6/TGFB3/MAPK3/LTF/HIF1A/CEBPB/CCL3/NOTCH1	29	BP
GO:0042108	positive regulation of cytokine biosynthetic process	18/415	63/17910	2.56100833923522e-15	2.65605250837014e-14	1.01174290665717e-14	HSPB1/ELANE/TNF/IL1A/WNT5A/AGER/PTPRC/HMOX1/TLR7/IL1B/IRF1/LBP/STAT3/IL6/CD80/RELA/TLR4/TLR9	18	BP
GO:0046916	cellular transition metal ion homeostasis	20/415	83/17910	2.70933229065392e-15	2.80609415817727e-14	1.06889673716961e-14	TF/TFR2/ATP7B/BMP6/MYC/SLC11A1/HMOX1/SOD1/ALAS2/HAMP/SLC40A1/SMAD4/TFRC/S100A8/SLC11A2/LTF/HIF1A/LCN2/CP/S100A9	20	BP
GO:0061614	pri-miRNA transcription by RNA polymerase II	16/415	46/17910	2.7228632290246e-15	2.81372137974614e-14	1.07180209664404e-14	TGFB1/IL10/TERT/TP53/TGFB2/SMAD3/PPARG/NR3C1/PDGFB/STAT3/SMAD4/PPARA/FOS/RELA/HIF1A/JUN	16	BP
GO:0010594	regulation of endothelial cell migration	31/415	231/17910	2.7240191366703e-15	2.81372137974614e-14	1.07180209664404e-14	EDN1/HSPB1/FGFR1/MET/APOE/PTK2/AGT/NFE2L2/WNT5A/PTGS2/VEGFA/TGFB1/HMOX1/APOH/SIRT1/AGTR2/HMGB1/PPARG/RHOA/PDGFB/CALR/SCARB1/SP1/FGF2/GLUL/HIF1A/NOS3/AKT1/SPARC/NOTCH1/PRKCA	31	BP
GO:0055123	digestive system development	25/415	143/17910	2.80676621277241e-15	2.8953017912961e-14	1.10287768812717e-14	BCL2/ASS1/CYP1A1/RARB/TNF/SHH/WNT5A/CTNNB1/TYMS/TGFB1/SMAD2/EGFR/SCT/CDKN1A/TGFB2/PKD1/SMAD3/CXCL8/ADA/COL3A1/TGFB3/IGF2/HIF1A/INSR/TGFBR2	25	BP
GO:0002821	positive regulation of adaptive immune response	21/415	94/17910	2.81540030317938e-15	2.89643257428829e-14	1.1033084257228e-14	FOXP3/C3/HSPD1/TNF/B2M/TGFB1/SLC11A1/PTPRC/IL4/SIRT1/IL1B/IL12RB1/NLRP3/TFRC/ADA/IL6/CD80/IL2/CD81/LTA/CD274	21	BP
GO:0030316	osteoclast differentiation	21/415	94/17910	2.81540030317938e-15	2.89643257428829e-14	1.1033084257228e-14	GNAS/TNF/CTNNB1/NOTCH2/TGFB1/ANXA2/BGLAP/CREB1/IL4/CSF1/IL17A/MTOR/MAPK14/TFRC/FOS/IFNG/LTF/CD81/TLR4/CEBPB/CCL3	21	BP
GO:2000113	negative regulation of cellular macromolecule biosynthetic process	80/415	1343/17910	2.84139127121138e-15	2.91926362556945e-14	1.11200522449182e-14	EDN1/EP300/SEMA4D/FGFR1/LEP/BRCA1/ELANE/FOXP3/BIRC5/EZR/HSPA8/NR1I3/BMP6/SNAI1/TNF/CREBBP/SHH/WNT5A/BMP7/CTNNB1/CCND1/ESR1/TYMS/VEGFA/TGFB1/MYC/NKX2-1/FOXO1/STAT1/GCLC/IGFBP5/MMP12/EIF2AK2/SMAD2/BRCA2/MDM2/CREB1/IL4/SRC/TP53/NFKB1/SIRT1/HAMP/SREBF1/TWIST1/EPO/HMGB1/IRF1/RXRA/SMAD3/IFNA2/EZH2/CD36/PPARG/CALCA/NR3C1/SMAD7/PDGFB/CALR/PCNA/NR1H2/STAT3/SMAD4/VDR/PPARA/IGF2/DDIT3/IFNG/CAV1/HNF4A/RELA/N…	80	BP
GO:0015711	organic anion transport	42/415	430/17910	2.98757672373389e-15	3.0653574261542e-14	1.16765524119232e-14	EDN1/NOS2/LEP/APOE/AGT/LDLR/ABCC2/SLCO1B1/ACE2/SLC11A1/ABCD3/SLC10A1/CETP/HBB/ABCB11/ABCC1/IL1B/AGXT/CPT1A/AGTR2/SLCO1B3/RXRA/APOC3/CD36/PPARG/MTTP/ABCB1/SLC25A13/ARG1/SCARB1/CPT2/ACE/PRKAA2/PPARA/FABP1/ABCB4/CFTR/NR1H4/AKT1/MIF/APOA1/KCNN4	42	BP
GO:0000122	negative regulation of transcription by RNA polymerase II	56/415	735/17910	3.39720059262437e-15	3.48099820724244e-14	1.32598103131065e-14	EDN1/EP300/SEMA4D/FGFR1/LEP/ELANE/FOXP3/EZR/BMP6/SNAI1/TNF/CREBBP/SHH/CTNNB1/CCND1/ESR1/VEGFA/TGFB1/MYC/NKX2-1/STAT1/MMP12/SMAD2/MDM2/TP53/NFKB1/SIRT1/HAMP/SREBF1/TWIST1/EPO/HMGB1/RXRA/SMAD3/EZH2/CD36/PPARG/NR3C1/SMAD7/PDGFB/CALR/PCNA/STAT3/SMAD4/VDR/PPARA/IGF2/DDIT3/IFNG/CAV1/RELA/NR1H4/TXN/CEBPB/JUN/NOTCH1	56	BP
GO:0043393	regulation of protein binding	30/415	217/17910	3.4267375765124e-15	3.5065883189744e-14	1.33572881074791e-14	EP300/MET/APOE/BCL2/WNT5A/B2M/PCSK9/ANXA2/IL10/LGALS3/MAPK8/TERT/SRC/PKD1/CD36/PDGFB/CSF3/SLPI/VTN/ADRB2/ACE/PPARA/HSPA5/CAV1/MAPK3/ACTB/AKT1/BAX/MMP9/ADIPOQ	30	BP
GO:0045927	positive regulation of growth	33/415	266/17910	3.48644528003079e-15	3.5553560649862e-14	1.35430540926982e-14	EDN1/CXCR4/IGF1/SEMA4D/FGFR1/LEP/BCL2/EZR/FN1/F2/VEGFA/INS/MAPK1/MMP14/EGFR/CREB1/BBS4/HAMP/TGFB2/CSF1/RHOA/MTOR/MAPK14/S100A8/IGF2/IL2/FGF2/CXCL12/INSR/TGFBR2/AKT1/NOTCH1/S100A9	33	BP
GO:0019915	lipid storage	18/415	64/17910	3.4882738750808e-15	3.5553560649862e-14	1.35430540926982e-14	LEP/APOE/C3/CRP/TNF/LPL/NFKB1/SIRT1/IL1B/NFKBIA/CD36/PPARG/NR1H2/SCARB1/IL6/PPARA/CAV1/APOA1	18	BP
GO:0032768	regulation of monooxygenase activity	18/415	64/17910	3.4882738750808e-15	3.5553560649862e-14	1.35430540926982e-14	LEP/APOE/TNF/INS/EGFR/TERT/NFKB1/IL1B/AGTR2/KRAS/SCARB1/HSP90AA1/VDR/IFNG/CAV1/HIF1A/NOS3/AKT1	18	BP
GO:0055072	iron ion homeostasis	19/415	74/17910	3.7998713913219e-15	3.86781611156408e-14	1.47332761788305e-14	TF/TFR2/BMP6/B2M/MYC/SLC11A1/HMOX1/SOD1/ALAS2/HAMP/SLC40A1/STEAP4/SMAD4/TFRC/SLC11A2/LTF/HIF1A/LCN2/CP	19	BP
GO:0033135	regulation of peptidyl-serine phosphorylation	23/415	119/17910	3.82079507441566e-15	3.88396959614872e-14	1.47948079949178e-14	BCL2/TNF/WNT5A/PTGS2/VEGFA/TGFB1/EGFR/HGF/AXIN1/NOS1/RAF1/SMAD7/CSF3/IL6/HSP90AA1/PIK3CA/IFNG/CAV1/AKT1/MIF/TXN/IFNB1/BAX	23	BP
GO:0001938	positive regulation of endothelial cell proliferation	22/415	107/17910	3.91067265559375e-15	3.97008181746868e-14	1.51228264690346e-14	FGFR1/BMP6/WNT5A/VEGFA/CCL11/HMOX1/IL10/SIRT1/HMGB1/MTOR/PDGFB/STAT3/ARG1/AGTR1/SP1/FGF2/CXCL12/HIF1A/AKT1/F3/JUN/PRKCA	22	BP
GO:0070838	divalent metal ion transport	43/415	454/17910	4.11343071712004e-15	4.17041095792447e-14	1.58859197671307e-14	CXCR4/BCL2/GCK/AGT/PDGFRB/EGF/F2/PTGS2/CTNNB1/TGFB1/IL13/SLC11A1/CCR7/PTPRC/ANXA2/LGALS3/GPR35/CXCL10/CCL5/EPO/PKD1/NOS1/PKD2/SLC40A1/RHOA/PDGFB/ATG5/CCL2/ANXA5/VDR/SLC11A2/LYN/PIK3CG/DDIT3/FGF2/CXCL12/ICAM1/CAV1/NOS3/TLR9/CCL3/KCNN4/BAX	43	BP
GO:0007548	sex differentiation	33/415	269/17910	4.85362767012909e-15	4.91437795058525e-14	1.87198371134165e-14	LEP/BCL2/BMP6/PDGFRB/SHH/WNT5A/CTNNB1/CCND1/ESR1/VEGFA/NKX2-1/BRCA2/MMP14/SOD1/SRC/IDH1/SIRT1/REN/TGFB2/PKD1/PTPN11/AFP/PTX3/SMAD4/CASP3/RBP4/HSPA5/ICAM1/HNF4A/NOS3/INSR/CEBPB/BAX	33	BP
GO:1901224	positive regulation of NIK/NF-kappaB signaling	19/415	75/17910	4.98212531374143e-15	5.0378464521188e-14	1.91901530436495e-14	EDN1/EP300/TNF/AGER/CD14/EIF2AK2/MMP8/EGFR/TLR7/IL1B/NOD2/TLR2/HAVCR2/RHOA/CALR/RBCK1/RELA/TLR4/TLR9	19	BP
GO:0031348	negative regulation of defense response	31/415	237/17910	5.61789884716914e-15	5.67326578718724e-14	2.1610590903904e-14	IGF1/ELANE/FOXP3/APOE/GSTP1/LDLR/TNFRSF1A/F2/AGER/TNFAIP3/MMP12/CR1/PTPRC/INS/IL10/SOD1/IL4/NFKB1/HAVCR2/HGF/NLRP3/SMAD3/PPARG/NR1H2/ARG1/ADA/PPARA/IL2/TNFRSF1B/APOA1/ADIPOQ	31	BP
GO:0033138	positive regulation of peptidyl-serine phosphorylation	20/415	86/17910	5.6849967399531e-15	5.73349080663249e-14	2.18399999085641e-14	BCL2/TNF/WNT5A/PTGS2/VEGFA/TGFB1/EGFR/AXIN1/NOS1/RAF1/CSF3/IL6/HSP90AA1/PIK3CA/IFNG/CAV1/AKT1/MIF/TXN/IFNB1	20	BP
GO:0070302	regulation of stress-activated protein kinase signaling cascade	30/415	222/17910	6.41597774096453e-15	6.45376818577387e-14	2.45836788338693e-14	XDH/EDN1/LEP/EZR/GSTP1/TNF/WNT5A/AGER/VEGFA/MYC/FOXO1/CCR7/HMGCR/EIF2AK2/MMP8/MAPK1/EGFR/IL1B/NOD2/HGF/HMGB1/TGFB2/AXIN1/FAS/LYN/MAPK3/TLR4/TLR9/AKT1/CD40LG	30	BP
GO:2000116	regulation of cysteine-type endopeptidase activity	30/415	222/17910	6.41597774096453e-15	6.45376818577387e-14	2.45836788338693e-14	XDH/HSPD1/TNF/JAK2/XIAP/PTGS2/VEGFA/MYC/VCP/MDM2/SRC/SIRT1/HGF/HMGB1/NLRP3/SMAD3/FAS/CASP8/PPARG/RHOA/RAF1/GSN/S100A8/FABP1/LTF/AKT1/F3/BAX/S100A9/MMP9	30	BP
GO:0051480	regulation of cytosolic calcium ion concentration	34/415	289/17910	6.51160333900941e-15	6.54139498827285e-14	2.49174666471072e-14	EDN1/BCL2/EDNRA/AGT/JAK2/F2/WNT5A/ESR1/TGFB1/IL13/CCR7/PTPRC/ANXA2/GPR35/CXCL10/EPO/HMGB1/PKD1/TGM2/NOS1/PKD2/SMAD3/CD36/CALCA/ATG5/AGTR1/LYN/PIK3CG/IL2/DDIT3/FGF2/CAV1/CCL3/BAX	34	BP
GO:0048638	regulation of developmental growth	36/415	325/17910	6.71268849147832e-15	6.73459674373511e-14	2.56534103267847e-14	EDN1/CXCR4/IGF1/SEMA4D/FGFR1/LEP/APOE/PTK2/BCL2/EZR/FN1/SPP1/WNT5A/VEGFA/MAPK1/SOD1/CREB1/BBS4/CDKN1A/HAMP/PTEN/CSF1/MTOR/MAPK14/STAT3/ADRB2/PPARA/RBP4/IGF2/PIK3CA/FGF2/CXCL12/INSR/TGFBR2/AKT1/NOTCH1	36	BP
GO:0030301	cholesterol transport	21/415	98/17910	6.902535913495e-15	6.91579459260594e-14	2.63436287532611e-14	LEP/APOE/EGF/LDLR/SHH/PCSK9/ANXA2/CETP/NFKB1/SIRT1/NFKBIA/APOC3/CD36/PPARG/NR1H2/SCARB1/CAV1/ABCB4/CFTR/APOA1/ADIPOQ	21	BP
GO:0006879	cellular iron ion homeostasis	17/415	57/17910	6.91129505155675e-15	6.91579459260594e-14	2.63436287532611e-14	TF/TFR2/BMP6/MYC/SLC11A1/HMOX1/SOD1/ALAS2/HAMP/SLC40A1/SMAD4/TFRC/SLC11A2/LTF/HIF1A/LCN2/CP	17	BP
GO:0050918	positive chemotaxis	18/415	67/17910	8.51021504818969e-15	8.50468174841843e-14	3.23960140291774e-14	MET/WNT5A/AGER/VEGFA/LGALS3/CXCL10/CCL5/HGF/HMGB1/SMAD3/TSC2/CXCL8/PDGFB/FGF7/FGF2/MIF/F3/CCL3	18	BP
GO:0036094	small molecule binding	118/412	2340/16967	1.34018515555094e-15	9.09650674330197e-14	5.75750596430764e-14	ABCA3/XDH/ABCB7/NOS2/FGFR1/MET/UGT1A1/CYP2C19/DGUOK/GNAS/ALDH2/HSPD1/PTK2/GPD1/GCK/GUCY2C/ASS1/CYP1A1/ACTC1/HSPA8/ATP7B/CYP3A5/PDGFRB/ABCC2/JAK2/CBS/TYMS/MRC1/VCP/GPT/GCLC/SLC22A5/HMGCR/ABCD3/EIF2AK2/PNPLA3/ACADM/MAPK1/EGFR/IKBKB/MAPK8/CETP/SRC/HBB/POLE/GFER/TP53/CAT/ABCB11/HADHA/IDH1/ABCC1/AGXT/ALAS2/ALB/NOD2/NME1/NLRP3/FASN/FARSB/TGM2/RXRA/NOS1/MTHFR/APOC3/KRAS/PPARG/HSPA4/RHOA/SELE/ABCB1/MTOR/…	118	MF
GO:0002456	T cell mediated immunity	20/415	88/17910	9.15561601144101e-15	9.13778039583431e-14	3.48076119313978e-14	FOXP3/AIRE/HSPD1/B2M/AGER/SLC11A1/PTPRC/IL4/IL1B/HMGB1/IL12RB1/NLRP3/IFNA2/SMAD7/ARG1/IL6/ICAM1/TNFRSF1B/CD81/IFNB1	20	BP
GO:0031099	regeneration	28/415	194/17910	9.60522283911022e-15	9.57407749916499e-14	3.6469553847451e-14	IGF1/UGT1A1/BCL2/GSTP1/JAK2/SPP1/CCND1/TYMS/TGFB1/HMOX1/IL10/EGFR/CDKN1A/CLDN1/HAMP/HGF/PTEN/EZH2/PPARG/GSN/PCNA/VTN/CXCL12/CD81/TGFBR2/APOA1/CEBPB/JUN	28	BP
GO:0010952	positive regulation of peptidase activity	27/415	180/17910	1.10369257673682e-14	1.09868878914799e-13	4.18512279234402e-14	XDH/HSPD1/FN1/TNF/JAK2/AGER/MYC/VCP/CR1/SIRT1/HMGB1/NLRP3/SMAD3/FAS/CASP8/PPARG/RHOA/MAPK14/GSN/STAT3/S100A8/LYN/CAV1/MAPK3/F3/BAX/S100A9	27	BP
GO:0002824	positive regulation of adaptive immune response based on somatic recombination of immune receptors built from immunoglobulin superfamily domains	20/415	89/17910	1.15610716195602e-14	1.14937691327711e-13	4.37820387744223e-14	FOXP3/C3/HSPD1/TNF/B2M/TGFB1/SLC11A1/PTPRC/IL4/IL1B/IL12RB1/NLRP3/TFRC/ADA/IL6/CD80/IL2/CD81/LTA/CD274	20	BP
GO:0098754	detoxification	22/415	113/17910	1.30481848387838e-14	1.29554651790767e-13	4.93499279704309e-14	SOD2/APOE/GSTP1/NFE2L2/HP/TNF/ABCC2/PTGS2/BMP7/GSTM1/SOD1/HBB/CAT/ALB/CD36/MPO/FABP1/NOS3/GSTM3/TXN/GSTT1/S100A9	22	BP
GO:0043254	regulation of protein complex assembly	40/415	409/17910	1.36323727796493e-14	1.35180367498845e-13	5.14928742956938e-14	EP300/MET/APOE/IL5/HSPA8/TNF/CTNNB1/ESR1/VEGFA/TGFB1/VCP/MMP1/CCR7/EIF2AK2/CCL11/INS/MMP3/CREB1/BBS4/SRC/TP53/ALB/TWIST1/HMGB1/PTPN11/CD36/RHOA/MTOR/RAF1/GSN/ELN/CSF3/HSP90AA1/PRKAA2/IFNG/ICAM1/TLR4/JUN/BAX/CSF2	40	BP
GO:0042509	regulation of tyrosine phosphorylation of STAT protein	19/415	79/17910	1.41002003391642e-14	1.39639226297006e-13	5.31913417569392e-14	IGF1/LEP/TNF/JAK2/TNFRSF1A/IL13/IL4/CCL5/EPO/IFNA2/STAT3/IL6/PECAM1/LYN/IL2/IFNG/CAV1/SH2B3/CSF2	19	BP
GO:0050764	regulation of phagocytosis	20/415	90/17910	1.45516483701121e-14	1.43924604535793e-13	5.48237270436655e-14	C3/TNF/SFTPD/TGFB1/SLC11A1/PTPRC/SOD1/IL1B/TLR2/HMGB1/PTEN/CD36/PPARG/CALR/ATG5/PTX3/SCARB1/CCL2/APOA1/ADIPOQ	20	BP
GO:0010629	negative regulation of gene expression	110/415	2278/17910	1.56851672515748e-14	1.54936388596854e-13	5.90183332791631e-14	XDH/EDN1/HSPB1/IGF1/EP300/NOS2/SEMA4D/FGFR1/LEP/BRCA1/ELANE/FOXP3/BIRC5/APOE/EZR/HSPA8/NR1I3/BMP6/SNAI1/TNF/CREBBP/LDLR/SHH/WNT5A/BMP7/CTNNB1/CCND1/NOTCH2/ESR1/TYMS/PSMB8/VEGFA/TGFB1/MYC/NKX2-1/SLC11A1/FOXO1/STAT1/GCLC/IGFBP5/MMP12/CR1/EIF2AK2/SMAD2/MMP8/MDM2/EGFR/CREB1/IL4/BBS4/TERT/SRC/TP53/CDKN1A/NFKB1/SIRT1/HAMP/SREBF1/HAVCR2/NME1/TWIST1/EPO/HMGB1/TGFB2/IRF1/RXRA/SMAD3/IFNA2/EZH2/CD36/PPARG/C…	110	BP
GO:0046660	female sex differentiation	22/415	114/17910	1.5828339812724e-14	1.55949732642031e-13	5.940433605828e-14	LEP/BCL2/WNT5A/ESR1/VEGFA/BRCA2/MMP14/SOD1/SRC/IDH1/SIRT1/AFP/PTX3/SMAD4/CASP3/RBP4/HSPA5/ICAM1/NOS3/INSR/CEBPB/BAX	22	BP
GO:1901222	regulation of NIK/NF-kappaB signaling	22/415	114/17910	1.5828339812724e-14	1.55949732642031e-13	5.940433605828e-14	EDN1/EP300/TNF/BMP7/AGER/CD14/EIF2AK2/MMP8/EGFR/TLR7/IL1B/NFKBIA/NOD2/TLR2/HAVCR2/NLRP3/RHOA/CALR/RBCK1/RELA/TLR4/TLR9	22	BP
GO:0001837	epithelial to mesenchymal transition	24/415	140/17910	1.61198823776202e-14	1.58618816993612e-13	6.04210430516366e-14	COL1A1/SNAI1/WNT5A/BMP7/CTNNB1/TGFB1/NKX2-1/SMAD2/IL1B/TWIST1/HGF/TGFB2/PTEN/SMAD3/EZH2/MTOR/SMAD7/SMAD4/IL6/ENG/TGFB3/HIF1A/TGFBR2/NOTCH1	24	BP
GO:0032963	collagen metabolic process	21/415	102/17910	1.61935328455673e-14	1.59139769716349e-13	6.06194842421897e-14	MMP2/MMP7/COL1A1/PDGFRB/ITGB1/F2/TGFB1/MMP1/MMP12/MMP3/MMP8/MMP14/COL1A2/PPARG/VIM/ARG1/IL6/ENG/TGFB3/HIF1A/MMP9	21	BP
GO:0032637	interleukin-8 production	19/415	80/17910	1.81033228530043e-14	1.77680761335042e-13	6.76821144776566e-14	NOS2/LEP/ELANE/CRP/TNF/WNT5A/PTPRC/CD14/IL10/TLR7/IL1B/NOD2/TLR2/LBP/DDIT3/TLR4/SERPINE1/TLR9/ADIPOQ	19	BP
GO:0002064	epithelial cell development	28/415	199/17910	1.8594055906985e-14	1.82264438322934e-13	6.94281276548407e-14	CXCR4/FGFR1/MET/EZR/RARB/BMP6/TNF/TNFRSF1A/WNT5A/CTNNB1/ESR1/TYMS/IKBKB/SOD1/CDKN1A/CLDN1/IL1B/FASN/PDGFB/VIM/ENG/PECAM1/ICAM1/HNF4A/HIF1A/GSTM3/ACTA2/ADIPOQ	28	BP
GO:0072330	monocarboxylic acid biosynthetic process	35/415	318/17910	1.96800552255855e-14	1.92663980138376e-13	7.33895187158611e-14	EDN1/IGF1/BRCA1/CYP2D6/GPD1/GCK/CYP1A1/PPARGC1A/PTGS2/CYP2C9/ABCD3/INS/AKR1D1/TP53/LPL/ABCB11/SIRT1/IL1B/AGXT/ALOX5/FASN/APOC3/NR1H2/STAT3/CYP2E1/PRKAA2/PPARA/CYP1A2/HIF1A/NR1H4/INSR/MIF/ALDOB/CYP3A4/ADIPOQ	35	BP
GO:0014812	muscle cell migration	21/415	103/17910	1.99128381872731e-14	1.94694861920094e-13	7.41631217340386e-14	IGF1/BCL2/AGT/GSTP1/NFE2L2/PPARGC1A/PDGFRB/IGFBP5/MDM2/PDGFA/TERT/SRC/CCL5/IGFBP3/PLAU/PDGFB/NOX4/VTN/ACE/SERPINE1/ADIPOQ	21	BP
GO:0051129	negative regulation of cellular component organization	52/415	673/17910	2.08691223807642e-14	2.03785521596154e-13	7.76259337135094e-14	IGF1/EP300/MET/BRCA1/DGUOK/FOXP3/APOE/PTK2/HSPA8/PPARGC1A/TNF/LDLR/TNFRSF1A/SPP1/WNT5A/BMP7/B2M/TGFB1/PCSK9/INS/MMP14/MDM2/IKBKB/LGALS3/BBS4/SRC/CXCL10/TP53/SIRT1/ALB/TLR2/TWIST1/HGF/HMGB1/PTEN/APOC3/TSC2/RHOA/RAF1/GSN/VIM/ATG5/NR1H2/SMAD4/ACE/TOP2A/CAV1/TNFRSF1B/AKT1/APOA1/NOTCH1/ADIPOQ	52	BP
GO:0050728	negative regulation of inflammatory response	26/415	170/17910	2.15901760372444e-14	2.10559013764243e-13	8.02060907822291e-14	IGF1/ELANE/FOXP3/APOE/GSTP1/LDLR/TNFRSF1A/F2/AGER/TNFAIP3/PTPRC/INS/IL10/SOD1/IL4/NFKB1/HGF/NLRP3/SMAD3/PPARG/ADA/PPARA/IL2/TNFRSF1B/APOA1/ADIPOQ	26	BP
GO:0006816	calcium ion transport	40/415	415/17910	2.2164505965349e-14	2.15886220967943e-13	8.22353293171045e-14	CXCR4/BCL2/GCK/AGT/PDGFRB/EGF/F2/PTGS2/CTNNB1/TGFB1/IL13/CCR7/PTPRC/ANXA2/LGALS3/GPR35/CXCL10/CCL5/EPO/PKD1/NOS1/PKD2/RHOA/PDGFB/ATG5/CCL2/ANXA5/VDR/LYN/PIK3CG/DDIT3/FGF2/CXCL12/ICAM1/CAV1/NOS3/TLR9/CCL3/KCNN4/BAX	40	BP
GO:0032755	positive regulation of interleukin-6 production	19/415	81/17910	2.31539217281364e-14	2.2523783351991e-13	8.57975434056595e-14	HSPD1/TNF/WNT5A/AGER/MMP8/LPL/IL1B/NOD2/TLR2/TWIST1/HMGB1/PTPN11/CD36/LBP/IL17A/STAT3/IL6/TLR4/TLR9	19	BP
GO:0051962	positive regulation of nervous system development	45/415	519/17910	2.32041849011168e-14	2.25441417149283e-13	8.58750924346341e-14	CXCR4/EP300/SEMA4D/FGFR1/APOE/BCL2/AGT/RARB/TCF4/FN1/NFE2L2/BMP6/TNF/EGF/SHH/WNT5A/BMP7/AGER/CTNNB1/VEGFA/TGFB1/TUBB2B/IL1B/TLR2/NME1/EPO/HGF/PTEN/EZH2/CSF1/PPARG/RHOA/MTOR/IL6/LYN/IL2/HSPA5/CXCL12/TNFRSF1B/RELA/HIF1A/LTA/CCL3/NOTCH1/S100A9	45	BP
GO:0044432	endoplasmic reticulum part	75/415	1289/18675	1.00602805285561e-14	2.27434199092e-13	1.2896825790367e-13	EDN1/UGT1A1/CYP2D6/CYP2C19/COL1A1/APOE/C3/BCL2/TF/GUCY2C/CYP1A1/FN1/CYP3A5/SHH/SPP1/SFTPD/F2/WNT5A/PTGS2/B2M/CYP2C9/NOTCH2/PCSK9/VCP/IGFBP5/HMGCR/HMOX1/INS/BGLAP/PNPLA3/EGFR/TLR7/PDGFA/IGFBP3/ALB/SREBF1/HLA-C/COL1A2/NOS1/PKD2/CSF1/CDH2/RHOA/SERPINA1/MTTP/AFP/MTOR/PDGFB/CALR/HLA-A/NOX4/VTN/CYP2E1/UGT1A6/IL6/COL3A1/UGT1A9/CYP1A2/HSPA5/EPHX1/CAV1/HSP90B1/SFTPB/CFTR/ATF6/TLR9/HLA-B/CANX/CYP2B6/SERPIN…	75	CC
GO:0010595	positive regulation of endothelial cell migration	23/415	129/17910	2.38488765942796e-14	2.3141239473111e-13	8.81495558329234e-14	EDN1/HSPB1/FGFR1/MET/AGT/NFE2L2/WNT5A/PTGS2/VEGFA/TGFB1/HMOX1/SIRT1/HMGB1/PDGFB/CALR/SCARB1/SP1/FGF2/HIF1A/NOS3/AKT1/SPARC/PRKCA	23	BP
GO:0051353	positive regulation of oxidoreductase activity	16/415	52/17910	2.50614716638491e-14	2.42871891219017e-13	9.25147045824177e-14	EDN1/APOE/AGT/TNF/INS/TERT/IL1B/NOD2/AGTR2/KRAS/AGTR1/SCARB1/VDR/IFNG/HIF1A/AKT1	16	BP
GO:0050777	negative regulation of immune response	24/415	143/17910	2.63575858686697e-14	2.55110890932905e-13	9.71767815203108e-14	FOXP3/TNF/TGFB1/TNFAIP3/MMP12/CR1/PTPRC/HMOX1/INS/IL10/LGALS3/HAVCR2/TGFB2/IFNA2/PPARG/SMAD7/NR1H2/ARG1/COL3A1/LYN/TGFB3/IL2/APOA1/IFNB1	24	BP
GO:0030217	T cell differentiation	30/415	234/17910	2.69520777180976e-14	2.60536751274944e-13	9.92435989858054e-14	LEP/FOXP3/BCL2/SHH/B2M/CTNNB1/TGFB1/CCR7/CR1/PTPRC/SOD1/IL4/TP53/HMGB1/IL12RB1/IRF1/NLRP3/IFNA2/RHOA/MTOR/SMAD7/ATG5/STAT3/ADA/IL6/CD80/IL2/IFNG/TGFBR2/IFNB1	30	BP
GO:0051591	response to cAMP	20/415	93/17910	2.84852285266664e-14	2.75011282949034e-13	1.04757234240491e-13	COL1A1/GPD1/ASS1/EZR/STAT1/IGFBP5/REN/AGXT/SREBF1/NME1/PKD2/THBD/NOX4/PIK3CG/FOS/HSPA5/RELA/CFTR/SPARC/ADIPOQ	20	BP
GO:0001659	temperature homeostasis	26/415	172/17910	2.87486527002088e-14	2.77206268508287e-13	1.0559334763162e-13	CXCR4/LEP/GNAS/PPARGC1A/TNF/IL1A/JAK2/PTGS2/VEGFA/IL13/FOXO1/FH/IL4/IL1B/CD36/NR1H2/STAT3/ADRB2/CPT2/DDIT3/CAV1/TLR4/LCN2/CEBPB/NOTCH1/ADIPOQ	26	BP
GO:0007260	tyrosine phosphorylation of STAT protein	19/415	82/17910	2.9503318871727e-14	2.83770970624809e-13	1.08093972442228e-13	IGF1/LEP/TNF/JAK2/TNFRSF1A/IL13/IL4/CCL5/EPO/IFNA2/STAT3/IL6/PECAM1/LYN/IL2/IFNG/CAV1/SH2B3/CSF2	19	BP
GO:2000106	regulation of leukocyte apoptotic process	19/415	82/17910	2.9503318871727e-14	2.83770970624809e-13	1.08093972442228e-13	WNT5A/CCR7/IL10/LGALS3/CCL5/TP53/SIRT1/NOD2/PTEN/CXCR2/ADA/LYN/IL2/CXCL12/HIF1A/MIF/CDKN2A/CD274/BAX	19	BP
GO:0009408	response to heat	25/415	158/17910	3.09101884505988e-14	2.96930997803565e-13	1.13106886948836e-13	IGF1/EP300/HSPA8/IL1A/CREBBP/ABCC2/PTGS2/VCP/GCLC/CD14/HMOX1/MAPK1/SOD1/CXCL10/CDKN1A/SIRT1/NOS1/MTOR/HSP90AA1/CD34/LYN/CXCL12/MAPK3/NOS3/AKT1	25	BP
GO:0007178	transmembrane receptor protein serine/threonine kinase signaling pathway	35/415	323/17910	3.15440613956921e-14	3.0264183748551e-13	1.1528225867852e-13	EP300/PTK2/BMP6/CREBBP/SHH/XIAP/WNT5A/BMP7/TGFB1/NKX2-1/SMAD2/CREB1/SRC/TP53/SIRT1/COL1A2/TGFB2/SMAD3/RHOA/AFP/MAPK14/SMAD7/VIM/SMAD4/COL3A1/ENG/TGFB3/FOS/HSPA5/CAV1/MAPK3/HNF4A/TGFBR2/JUN/NOTCH1	35	BP
GO:0032872	regulation of stress-activated MAPK cascade	29/415	220/17910	3.54586555589762e-14	3.39775271783955e-13	1.29427117875722e-13	XDH/EDN1/LEP/EZR/GSTP1/TNF/WNT5A/AGER/VEGFA/MYC/FOXO1/CCR7/HMGCR/EIF2AK2/MMP8/MAPK1/EGFR/IL1B/NOD2/HGF/HMGB1/TGFB2/AXIN1/FAS/MAPK3/TLR4/TLR9/AKT1/CD40LG	29	BP
GO:0009895	negative regulation of catabolic process	33/415	288/17910	3.55542491499948e-14	3.40267004629776e-13	1.29614428637524e-13	NOS2/MET/LEP/PTK2/BCL2/ALAD/HP/PPARGC1A/TNF/SHH/SLC11A1/HMGCR/ANXA2/HMOX1/INS/IL10/EGFR/TP53/IL1B/HGF/SMAD3/APOC3/TSC2/MTOR/MAPK14/STAT3/DKC1/PPARA/PIK3CG/PIK3CA/RELA/NAF1/AKT1	33	BP
GO:1902895	positive regulation of pri-miRNA transcription by RNA polymerase II	13/415	30/17910	3.85995057284846e-14	3.68951743188314e-13	1.40541012609212e-13	TGFB1/IL10/TERT/TP53/TGFB2/SMAD3/NR3C1/PDGFB/STAT3/FOS/RELA/HIF1A/JUN	13	BP
GO:0048565	digestive tract development	23/415	132/17910	3.99328281713903e-14	3.81222092543025e-13	1.4521503124503e-13	BCL2/ASS1/CYP1A1/RARB/TNF/SHH/WNT5A/CTNNB1/TYMS/TGFB1/SMAD2/EGFR/SCT/CDKN1A/TGFB2/PKD1/SMAD3/CXCL8/ADA/COL3A1/TGFB3/HIF1A/TGFBR2	23	BP
GO:0007204	positive regulation of cytosolic calcium ion concentration	31/415	255/17910	4.31837914790543e-14	4.1174620039272e-13	1.56842267341322e-13	EDN1/BCL2/EDNRA/AGT/JAK2/F2/ESR1/TGFB1/IL13/CCR7/PTPRC/GPR35/CXCL10/EPO/HMGB1/PKD1/TGM2/NOS1/PKD2/CD36/CALCA/ATG5/AGTR1/LYN/PIK3CG/IL2/DDIT3/FGF2/CAV1/CCL3/BAX	31	BP
GO:0045936	negative regulation of phosphate metabolic process	47/415	572/17910	4.39041414855344e-14	4.17266047330672e-13	1.58944886159175e-13	XDH/HSPB1/SEMA4D/APOE/EZR/GSTP1/PPARGC1A/TNF/BMP7/TGFB1/MYC/TNFAIP3/FOXO1/PTPRC/HMGCR/IKBKB/LGALS3/PDGFA/TP53/CDKN1A/SIRT1/IL1B/IGFBP3/TWIST1/HGF/TGFB2/PTEN/TSC2/RHOA/MTOR/SMAD7/PDGFB/STAT3/SMAD4/CASP3/ENG/PPARA/LYN/IL2/CAV1/SH2B3/TLR4/AKT1/CDKN2A/JUN/BAX/ADIPOQ	47	BP
GO:0006641	triglyceride metabolic process	20/415	95/17910	4.39255995173082e-14	4.17266047330672e-13	1.58944886159175e-13	APOE/C3/LDLR/PCSK9/PNPLA3/APOH/CETP/LPL/CAT/SIRT1/CPT1A/SREBF1/PTPN11/APOC3/NR1H2/CYP2E1/SCARB1/FABP1/PIK3CG/CAV1	20	BP
GO:0008585	female gonad development	20/415	95/17910	4.39255995173082e-14	4.17266047330672e-13	1.58944886159175e-13	LEP/BCL2/ESR1/VEGFA/BRCA2/MMP14/SOD1/SRC/IDH1/SIRT1/AFP/PTX3/SMAD4/CASP3/HSPA5/ICAM1/NOS3/INSR/CEBPB/BAX	20	BP
GO:0015918	sterol transport	21/415	107/17910	4.44470882192835e-14	4.21178634975578e-13	1.60435268139175e-13	LEP/APOE/EGF/LDLR/SHH/PCSK9/ANXA2/CETP/NFKB1/SIRT1/NFKBIA/APOC3/CD36/PPARG/NR1H2/SCARB1/CAV1/ABCB4/CFTR/APOA1/ADIPOQ	21	BP
GO:1990748	cellular detoxification	21/415	107/17910	4.44470882192835e-14	4.21178634975578e-13	1.60435268139175e-13	SOD2/APOE/GSTP1/NFE2L2/HP/TNF/PTGS2/BMP7/GSTM1/SOD1/HBB/CAT/ALB/CD36/MPO/FABP1/NOS3/GSTM3/TXN/GSTT1/S100A9	21	BP
GO:0051054	positive regulation of DNA metabolic process	29/415	222/17910	4.4998372855654e-14	4.25877457383868e-13	1.62225142483243e-13	FGFR1/BRCA1/PPARGC1A/PDGFRB/CTNNB1/TGFB1/MYC/PTPRC/MAPK1/EGFR/IL4/SRC/SIRT1/HGF/HMGB1/PDGFB/PCNA/NOX4/DKC1/TFRC/IL6/HSP90AA1/IL2/FGF2/MAPK3/NAF1/AKT1/JUN/BAX	29	BP
GO:0010959	regulation of metal ion transport	37/415	365/17910	4.61545661099683e-14	4.36282706709848e-13	1.66188707647856e-13	CXCR4/BCL2/TF/GCK/AGT/PDGFRB/EGF/F2/PTGS2/B2M/CTNNB1/TGFB1/PCSK9/IL13/LGALS3/GPR35/CXCL10/CCL5/EPO/PTEN/NOS1/PKD2/RHOA/PDGFB/ATG5/ADRB2/CCL2/LYN/PIK3CG/CXCL12/ICAM1/CAV1/NOS3/TLR9/AKT1/CCL3/BAX	37	BP
GO:0010563	negative regulation of phosphorus metabolic process	47/415	573/17910	4.68400611486651e-14	4.42218513424436e-13	1.68449773767539e-13	XDH/HSPB1/SEMA4D/APOE/EZR/GSTP1/PPARGC1A/TNF/BMP7/TGFB1/MYC/TNFAIP3/FOXO1/PTPRC/HMGCR/IKBKB/LGALS3/PDGFA/TP53/CDKN1A/SIRT1/IL1B/IGFBP3/TWIST1/HGF/TGFB2/PTEN/TSC2/RHOA/MTOR/SMAD7/PDGFB/STAT3/SMAD4/CASP3/ENG/PPARA/LYN/IL2/CAV1/SH2B3/TLR4/AKT1/CDKN2A/JUN/BAX/ADIPOQ	47	BP
GO:0016049	cell growth	42/415	466/17910	4.85274025265934e-14	4.57586611554442e-13	1.74303786149766e-13	EDN1/CXCR4/IGF1/SEMA4D/APOE/BCL2/AGT/FN1/ITGB1/SPP1/F2/WNT5A/CTNNB1/VEGFA/TGFB1/IGFBP5/INS/MMP14/EGFR/TP53/CDKN1A/SIRT1/IGFBP3/HAMP/AGTR2/TGFB2/SMAD3/PPARG/RHOA/MTOR/AGTR1/SMAD4/S100A8/HSP90AA1/PPARA/IL2/CXCL12/HNF4A/TGFBR2/AKT1/CDKN2A/S100A9	42	BP
GO:1903827	regulation of cellular protein localization	44/415	509/17910	5.12440342003347e-14	4.82610787781338e-13	1.83835989565442e-13	LEP/BCL2/EZR/HPS4/TNF/EGF/ITGB1/SHH/F2/WNT5A/PTGS2/CTNNB1/TGFB1/INS/MAPK1/MMP14/MDM2/EGFR/LGALS3/MAPK8/TERT/SRC/TP53/IL1B/SREBF1/AGTR2/PTPN11/SMAD3/CD36/CASP8/CDH2/MAPK14/GSN/DKC1/HSP90AA1/PRKAA2/CDH1/IFNG/GLUL/CD81/ACTB/AKT1/TXN/ADIPOQ	44	BP
GO:0032612	interleukin-1 production	21/415	108/17910	5.40151951246247e-14	5.08086627335056e-13	1.93540240471019e-13	HSPB1/IGF1/GSTP1/JAK2/WNT5A/AGER/TNFAIP3/CCR7/IL10/LPL/IL1B/NOD2/HAVCR2/HMGB1/NLRP3/SMAD3/CD36/NR1H4/TLR4/APOA1/CCL3	21	BP
GO:0042116	macrophage activation	20/415	96/17910	5.43181715257443e-14	5.10311917084774e-13	1.94387897327365e-13	HSPD1/TNF/LDLR/WNT5A/AGER/IL13/SLC11A1/PTPRC/MMP8/IL10/TLR7/TLR2/HAVCR2/LBP/IL6/IFNG/TLR4/MIF/CCL3/JUN	20	BP
GO:0030260	entry into host cell	23/415	134/17910	5.5861019243044e-14	5.22252959711427e-13	1.9893647652056e-13	CXCR4/MET/ITGB1/LDLR/CTNNB1/ACE2/MRC1/CR1/SLC10A1/EGFR/SRC/CLDN1/IFNA2/CXCL8/GSN/PTX3/SCARB1/TFRC/CD80/CDH1/ICAM1/CAV1/CD81	23	BP
GO:0044409	entry into host	23/415	134/17910	5.5861019243044e-14	5.22252959711427e-13	1.9893647652056e-13	CXCR4/MET/ITGB1/LDLR/CTNNB1/ACE2/MRC1/CR1/SLC10A1/EGFR/SRC/CLDN1/IFNA2/CXCL8/GSN/PTX3/SCARB1/TFRC/CD80/CDH1/ICAM1/CAV1/CD81	23	BP
GO:0051806	entry into cell of other organism involved in symbiotic interaction	23/415	134/17910	5.5861019243044e-14	5.22252959711427e-13	1.9893647652056e-13	CXCR4/MET/ITGB1/LDLR/CTNNB1/ACE2/MRC1/CR1/SLC10A1/EGFR/SRC/CLDN1/IFNA2/CXCL8/GSN/PTX3/SCARB1/TFRC/CD80/CDH1/ICAM1/CAV1/CD81	23	BP
GO:0051828	entry into other organism involved in symbiotic interaction	23/415	134/17910	5.5861019243044e-14	5.22252959711427e-13	1.9893647652056e-13	CXCR4/MET/ITGB1/LDLR/CTNNB1/ACE2/MRC1/CR1/SLC10A1/EGFR/SRC/CLDN1/IFNA2/CXCL8/GSN/PTX3/SCARB1/TFRC/CD80/CDH1/ICAM1/CAV1/CD81	23	BP
GO:0043122	regulation of I-kappaB kinase/NF-kappaB signaling	29/415	224/17910	5.69508681329494e-14	5.31795165980214e-13	2.02571291523607e-13	HSPB1/IRF3/GSTP1/TNF/TNFRSF1A/WNT5A/CTNNB1/ESR1/TNFAIP3/STAT1/CCR7/HMOX1/IKBKB/SIRT1/IL1B/NOD2/TGM2/CD36/CASP8/RHOA/CHUK/RBCK1/LTF/RELA/NR1H4/TLR4/TLR9/AKT1/ADIPOQ	29	BP
GO:0003012	muscle system process	41/415	448/17910	5.93820364435177e-14	5.53823968529652e-13	2.10962497891444e-13	EDN1/CXCR4/IGF1/LEP/PTK2/EDNRA/ACTC1/AGT/GAA/PPARGC1A/TNFRSF1A/PTGS2/ACE2/FOXO1/IGFBP5/HMOX1/SOD1/IL1B/HAMP/AGTR2/DSP/NOS1/SMAD3/EZH2/RHOA/MTOR/GSN/SMAD7/VIM/CHUK/SMAD4/ADA/PPARA/PIK3CG/PIK3CA/CAV1/TNFRSF1B/NOS3/ACTA2/NOTCH1/PRKCA	41	BP
GO:0032615	interleukin-12 production	16/415	55/17910	6.75120093041769e-14	6.28884595760727e-13	2.39554574641041e-13	LEP/HSPD1/AGER/CCR7/IL10/NFKB1/TLR2/HMGB1/IRF1/CD36/MAPK14/IFNG/RELA/TLR4/TLR9/CD40LG	16	BP
GO:0005996	monosaccharide metabolic process	32/415	277/17910	7.0051537189677e-14	6.51750681964489e-13	2.48264718904666e-13	IGF1/EP300/UGT1A1/LEP/GPD1/GCK/GAA/PPARGC1A/TNF/FOXO1/GCLC/IGFBP5/INS/SRC/TP53/SIRT1/IGFBP3/CPT1A/MTOR/MAPK14/SLC25A13/MPI/UGT1A6/PPARA/UGT1A9/RBP4/IGF2/PIK3CA/INSR/AKT1/ALDOB/ADIPOQ	32	BP
GO:0071456	cellular response to hypoxia	28/415	210/17910	7.41012460426547e-14	6.88595013104959e-13	2.62299452993856e-13	EDN1/MPL/EP300/BCL2/NFE2L2/PPARGC1A/CREBBP/PTGS2/BMP7/PSMB8/VEGFA/MYC/HMOX1/MDM2/TERT/SRC/TP53/SIRT1/TWIST1/EPO/PTEN/MTOR/CD34/FABP1/ICAM1/HIF1A/AKT1/NOTCH1	28	BP
GO:0014823	response to activity	17/415	65/17910	7.80138343809603e-14	7.2407767779913e-13	2.75815501415523e-13	EDN1/CXCR4/LEP/ALAD/AGT/BMP6/PPARGC1A/GCLC/BGLAP/IL10/CREB1/CAT/PTEN/MTOR/PRKAA2/HIF1A/ADIPOQ	17	BP
GO:0006805	xenobiotic metabolic process	21/415	110/17910	7.92498946002225e-14	7.33777638557482e-13	2.79510408222218e-13	UGT1A1/CYP2D6/CYP2C19/CYP1A1/GSTP1/CYP3A5/CYP2C9/GGT1/GSTM1/NAT2/CYP2E1/UGT1A6/AIP/UGT1A9/CYP1A2/EPHX1/HNF4A/GSTM3/CYP2B6/NR1I2/CYP3A4	21	BP
GO:0050864	regulation of B cell activation	21/415	110/17910	7.92498946002225e-14	7.33777638557482e-13	2.79510408222218e-13	FOXP3/BCL2/IL5/TGFB1/IL13/TNFAIP3/PTPRC/IL10/MMP14/IL4/CDKN1A/NOD2/TFRC/ADA/IL6/CASP3/IL2/CD81/TLR4/TLR9/MIF	21	BP
GO:0002719	negative regulation of cytokine production involved in immune response	12/415	25/17910	8.10618136888438e-14	7.49651068831245e-13	2.85556911607669e-13	FOXP3/TNF/TGFB1/HMOX1/IL10/TGFB2/IFNA2/SMAD7/ARG1/TGFB3/APOA1/IFNB1	12	BP
GO:0051924	regulation of calcium ion transport	30/415	244/17910	8.31574430019177e-14	7.68106910420358e-13	2.92587106513579e-13	CXCR4/BCL2/AGT/PDGFRB/EGF/F2/PTGS2/CTNNB1/TGFB1/IL13/LGALS3/GPR35/CXCL10/CCL5/EPO/NOS1/PKD2/RHOA/PDGFB/ATG5/CCL2/LYN/PIK3CG/CXCL12/ICAM1/CAV1/NOS3/TLR9/CCL3/BAX	30	BP
GO:0045787	positive regulation of cell cycle	37/415	373/17910	9.07035388978609e-14	8.36802756818801e-13	3.18754712421749e-13	EDN1/IGF1/EP300/FGFR1/BRCA1/CYP1A1/PDGFRB/EGF/IL1A/WNT5A/CCND1/TGFB1/INS/BRCA2/IL10/MDM2/EGFR/TERT/SRC/TP53/CDKN1A/IL1B/TGFB2/PKD1/PKD2/PTPN11/EZH2/RHOA/PDGFB/CALR/PCNA/IGF2/INSR/AKT1/MIF/BAX/PRKCA	37	BP
GO:0042742	defense response to bacterium	30/415	245/17910	9.27742242650757e-14	8.54879992178785e-13	3.256406887305e-13	NOS2/ELANE/CRP/HP/TNF/TNFRSF1A/SFTPD/F2/SLC11A1/IL10/NOD2/TLR2/HAVCR2/NLRP3/CD36/LBP/SLPI/CAMP/S100A8/IL6/RNASE3/LTF/NR1H4/TLR4/SERPINE1/TLR9/LCN2/LTA/CEBPB/S100A9	30	BP
GO:0042176	regulation of protein catabolic process	36/415	354/17910	9.37455139270941e-14	8.62795538358944e-13	3.28655876749132e-13	NOS2/APOE/PTK2/ALAD/EZR/NFE2L2/TNF/EGF/LDLR/SHH/WNT5A/PCSK9/VCP/TNFAIP3/FOXO1/GCLC/HMGCR/ANXA2/INS/IL10/MDM2/EGFR/IL1B/PTEN/AXIN1/PKD1/SMAD3/SMAD7/HSP90AA1/CDH1/IFNG/CAV1/TNFRSF1B/CD81/RELA/AKT1	36	BP
GO:0003158	endothelium development	22/415	124/17910	9.80344934176552e-14	9.00113598464373e-13	3.42871063565993e-13	XDH/CXCR4/MET/EZR/BMP6/TNF/TNFRSF1A/CTNNB1/IKBKB/CXCL10/CLDN1/IL1B/FASN/SLC40A1/RHOA/SMAD4/CD34/ENG/PECAM1/ICAM1/GSTM3/NOTCH1	22	BP
GO:0019218	regulation of steroid metabolic process	22/415	124/17910	9.80344934176552e-14	9.00113598464373e-13	3.42871063565993e-13	UGT1A1/LEP/APOE/AGT/BMP6/PPARGC1A/SNAI1/TNF/LDLR/HMGCR/SOD1/NFKB1/SIRT1/IL1B/SREBF1/FASN/AGTR1/VDR/SP1/IFNG/NR1H4/APOA1	22	BP
GO:0051099	positive regulation of binding	26/415	181/17910	9.92525466717336e-14	9.10209810468105e-13	3.46716910305352e-13	IGF1/EP300/MET/APOE/EGF/JAK2/WNT5A/B2M/CTNNB1/TGFB1/ANXA2/MMP8/LGALS3/TERT/NME1/TWIST1/HMGB1/PKD1/PPARG/CSF3/VTN/ACE/IFNG/CAV1/TXN/MMP9	26	BP
GO:0055085	transmembrane transport	81/415	1462/17910	9.94130670261333e-14	9.10595256371674e-13	3.46863734269716e-13	ABCA3/EDN1/ABCB7/IGF1/LEP/C3/BCL2/TF/EDNRA/AGT/HSPA8/NFE2L2/ATP7B/PPARGC1A/TNF/ABCC2/F2/SLCO1B1/SCNN1B/PSMB8/TGFB1/PCSK9/VCP/IL13/SLC11A1/CCR7/SLC22A5/PTPRC/ANXA2/ABCD3/INS/SLC10A1/GPR35/TERT/CXCL10/ABCB11/ABCC1/IL1B/CPT1A/SCNN1G/TWIST1/EPO/PTEN/SLCO1B3/PKD1/NOS1/PKD2/PTPN11/SLC40A1/ABCB1/MTOR/MAPK14/SLC25A13/RAF1/ATG5/ADRB2/SCARB1/CCL2/ANXA5/CPT2/PRKAA2/SLC11A2/LYN/PIK3CG/DDIT3/IFNG/HSPA5/FGF2/C…	81	BP
GO:0002020	protease binding	23/412	121/16967	1.48006426443508e-14	9.45499877162646e-13	5.98440845000686e-13	ELANE/COL1A1/BCL2/FN1/TNF/ITGB1/LDLR/VCP/TNFAIP3/ANXA2/INS/BRCA2/TP53/COL1A2/PTEN/SERPINA1/CASP3/COL3A1/SERPINE1/MIF/LCN2/SERPINC1/F3	23	MF
GO:0032869	cellular response to insulin stimulus	27/415	197/17910	1.05962661119148e-13	9.69432203215059e-13	3.69275890441541e-13	LEP/GCK/AGT/GSTP1/PCSK9/FOXO1/STAT1/GCLC/INS/BGLAP/SRC/LPL/SIRT1/IL1B/SREBF1/PTEN/PTPN11/TSC2/PPARG/IGF2/SP1/PIK3CA/RELA/NR1H4/INSR/AKT1/ADIPOQ	27	BP
GO:0098590	plasma membrane region	68/415	1130/18675	4.45371134708671e-14	9.72137683691686e-13	5.51257919911640e-13	MET/GNAS/PTK2/TF/EZR/PKHD1/HSPA8/FN1/ATP7B/PDGFRB/ITGB1/LDLR/ABCC2/KRT8/JAK2/PTGS2/AGER/CTNNB1/SLCO1B1/ACE2/SCNN1B/SLC22A5/ANXA2/HMOX1/SLC10A1/MAPK1/EGFR/BBS4/SRC/UMOD/CLDN1/ABCC1/NOD2/SCNN1G/NME1/PTEN/DSP/SLCO1B3/PKD1/NOS1/PKD2/SLC40A1/CD36/CDH2/RHOA/SELE/ABCB1/THBD/PDGFB/NOX4/ADRB2/SCARB1/TFRC/CD34/SLC11A2/CDH1/CAV1/MAPK3/ABCB4/CD81/NOS3/CFTR/INSR/TGFBR2/TLR9/SCNN1A/CANX/NOTCH1	68	CC
GO:1901861	regulation of muscle tissue development	24/415	152/17910	1.07067630533205e-13	9.78376623837905e-13	3.72682997074713e-13	EDN1/IGF1/FGFR1/BCL2/PPARGC1A/SHH/CTNNB1/TGFB1/IGFBP5/HMGCR/MAPK1/CREB1/HAMP/TWIST1/PTEN/SMAD3/MTOR/MAPK14/SMAD4/PPARA/RBP4/FGF2/TGFBR2/NOTCH1	24	BP
GO:0033028	myeloid cell apoptotic process	13/415	32/17910	1.07344173164429e-13	9.78576477780116e-13	3.72759125392118e-13	BCL2/IRF3/APOH/CCL5/SIRT1/NOD2/EPO/PTEN/CXCR2/IL6/MIF/CDKN2A/ADIPOQ	13	BP
GO:0071276	cellular response to cadmium ion	13/415	32/17910	1.07344173164429e-13	9.78576477780116e-13	3.72759125392118e-13	HMOX1/MAPK1/EGFR/SOD1/MAPK8/GSN/CHUK/CYP1A2/FOS/MAPK3/AKT1/JUN/MMP9	13	BP
GO:0006820	anion transport	45/415	542/17910	1.10027249357726e-13	1.00184764373711e-12	3.81623572541576e-13	EDN1/NOS2/FGFR1/LEP/APOE/AGT/LDLR/ABCC2/SLCO1B1/ACE2/SLC11A1/ABCD3/SLC10A1/CETP/HBB/ABCB11/ABCC1/IL1B/AGXT/CPT1A/AGTR2/SLCO1B3/RXRA/APOC3/CD36/PPARG/MTTP/ABCB1/MTOR/SLC25A13/ARG1/SCARB1/CPT2/ACE/PRKAA2/PPARA/FABP1/ABCB4/CFTR/NR1H4/AKT1/MIF/APOA1/CEBPB/KCNN4	45	BP
GO:0001558	regulation of cell growth	38/415	396/17910	1.1806754742122e-13	1.07378591944624e-12	4.09026283872205e-13	EDN1/CXCR4/IGF1/SEMA4D/APOE/BCL2/AGT/FN1/SPP1/F2/WNT5A/VEGFA/TGFB1/IGFBP5/INS/MMP14/EGFR/TP53/CDKN1A/SIRT1/IGFBP3/HAMP/AGTR2/TGFB2/SMAD3/PPARG/RHOA/MTOR/AGTR1/SMAD4/S100A8/PPARA/IL2/CXCL12/HNF4A/AKT1/CDKN2A/S100A9	38	BP
GO:0046545	development of primary female sexual characteristics	20/415	100/17910	1.23695896692358e-13	1.12364416794418e-12	4.28018276348698e-13	LEP/BCL2/ESR1/VEGFA/BRCA2/MMP14/SOD1/SRC/IDH1/SIRT1/AFP/PTX3/SMAD4/CASP3/HSPA5/ICAM1/NOS3/INSR/CEBPB/BAX	20	BP
GO:0002374	cytokine secretion involved in immune response	11/415	20/17910	1.26264671499325e-13	1.14562455781855e-12	4.36391041371556e-13	TNF/WNT5A/IL10/NOD2/TLR2/NLRP3/MAPK14/ATG5/TNFRSF1B/MAPK3/APOA1	11	BP
GO:0006352	DNA-templated transcription, initiation	29/415	231/17910	1.27249852746257e-13	1.15320179051295e-12	4.39277359095507e-13	RARB/TCF4/NR1I3/PPARGC1A/CREBBP/CTNNB1/CCND1/NOTCH2/ESR1/CREB1/TP53/CDKN1A/TWIST1/HMGB1/PTEN/RXRA/PPARG/NR3C1/NR1H2/VDR/PPARA/NR5A2/MAPK3/HNF4A/NR1H4/NR1I2/JUN/NOTCH1/BAX	29	BP
GO:0042531	positive regulation of tyrosine phosphorylation of STAT protein	17/415	67/17910	1.34957964616942e-13	1.22161596947137e-12	4.65337672307624e-13	IGF1/LEP/TNF/JAK2/TNFRSF1A/IL13/IL4/CCL5/EPO/IFNA2/STAT3/IL6/PECAM1/LYN/IL2/IFNG/CSF2	17	BP
GO:1902893	regulation of pri-miRNA transcription by RNA polymerase II	14/415	40/17910	1.38791782498034e-13	1.25484099823223e-12	4.77993742572177e-13	TGFB1/IL10/TERT/TP53/TGFB2/SMAD3/NR3C1/PDGFB/STAT3/PPARA/FOS/RELA/HIF1A/JUN	14	BP
GO:0017038	protein import	23/415	140/17910	1.47500422318436e-13	1.33201027675344e-12	5.07389046283098e-13	LEP/APOE/AGT/HSPA8/SHH/PTGS2/TGFB1/MMP12/MAPK1/TP53/CDKN1A/NFKBIA/AGTR2/SMAD3/CD36/TSC2/HSPA4/MAPK14/STAT3/HSP90AA1/CDH1/IFNG/AKT1	23	BP
GO:0008217	regulation of blood pressure	25/415	169/17910	1.51036673258094e-13	1.36234370186438e-12	5.18943647554683e-13	EDN1/SOD2/LEP/EDNRA/AGT/PTGS2/ACE2/HMOX1/SOD1/BBS4/HBB/REN/AGTR2/COL1A2/SMAD3/PPARG/RHOA/PDGFB/AGTR1/ACE/CD34/PPARA/NOS3/ACTA2/ADIPOQ	25	BP
GO:0031175	neuron projection development	59/415	879/17910	1.52780054227517e-13	1.37620278178652e-12	5.2422284507048e-13	CXCR4/EP300/SEMA4D/FGFR1/DGUOK/APOE/PTK2/BCL2/EZR/AGT/FN1/NFE2L2/ITGB1/SHH/JAK2/SPP1/WNT5A/BMP7/B2M/AGER/CTNNB1/VEGFA/NKX2-1/TUBB2B/MAPK1/MDM2/EGFR/SOD1/CREB1/BBS4/SRC/NME1/EPO/HGF/HMGB1/PTEN/PTPN11/EZH2/RHOA/MTOR/VIM/SMAD4/TUBB3/IL6/HSP90AA1/CASP3/SLC11A2/LYN/PIK3CA/IL2/CDH1/HSPA5/CXCL12/MAPK3/AKT1/APOA1/JUN/PRKCA/S100A9	59	BP
GO:1905954	positive regulation of lipid localization	18/415	78/17910	1.52931317585646e-13	1.37620278178652e-12	5.2422284507048e-13	EDN1/APOE/C3/BMP6/SPP1/ANXA2/LPL/NFKB1/SIRT1/IL1B/NFKBIA/CD36/NR1H2/SCARB1/ABCB4/MIF/APOA1/ADIPOQ	18	BP
GO:0045177	apical part of cell	36/415	365/18675	6.9970569958085e-14	1.47637902611559e-12	8.37191731779193e-13	GNAS/PTK2/TF/EZR/PKHD1/FN1/PDGFRB/LDLR/ABCC2/AGER/CTNNB1/SCNN1B/SLC22A5/PLAT/EGFR/UMOD/ABCB11/CLDN1/REN/HAMP/SCNN1G/PTEN/CD36/CDH2/ABCB1/NOX4/ADRB2/CD34/SLC11A2/FABP1/ABCB4/CFTR/VCAM1/TLR9/SCNN1A/NOTCH1	36	CC
GO:0046982	protein heterodimerization activity	45/412	497/16967	2.46741006670067e-14	1.48867074024274e-12	9.4223320090967e-13	UGT1A1/BCL2/TCF4/BMP6/ITGB1/CTNNB1/VEGFA/TGFB1/GCLC/SMAD2/TUBB2B/EGFR/IKBKB/PDGFA/TP53/NFKB1/TLR2/TWIST1/HGF/TGFB2/RXRA/SMAD3/PPARG/MTTP/RAF1/PDGFB/CHUK/AGTR1/UGT1A6/SMAD4/TTR/UGT1A9/TGFB3/RBP4/DDIT3/FOS/TOP2A/CAV1/RELA/HIF1A/TLR4/ATF6/CEBPB/JUN/BAX	45	MF
GO:0030139	endocytic vesicle	32/415	289/18675	7.50831356887841e-14	1.53314919003227e-12	8.69383676396447e-13	APOE/TF/HP/LDLR/SFTPD/WNT5A/B2M/SLC11A1/MDM2/EGFR/TLR7/HBB/HLA-C/TLR2/CD36/GSN/MPO/VIM/CALR/ATG5/HLA-A/SCARB1/HSP90AA1/CAV1/LTF/HSP90B1/SFTPB/NOS3/TLR9/HLA-B/SPARC/APOA1	32	CC
GO:0007623	circadian rhythm	27/415	201/17910	1.74141537210993e-13	1.56523709177366e-12	5.96229750672541e-13	EP300/NOS2/LEP/ASS1/PPARGC1A/TYMS/NKX2-1/EGFR/CREB1/MAPK8/TP53/SIRT1/CPT1A/SREBF1/PTEN/EZH2/PPARG/MTOR/ADA/PRKAA2/PPARA/TOP2A/HNF4A/SERPINE1/JUN/CSF2/ADIPOQ	27	BP
GO:0030195	negative regulation of blood coagulation	15/415	49/17910	1.78052451693689e-13	1.59851996643225e-12	6.08907855583067e-13	EDN1/APOE/F2/PLAT/APOH/PDGFA/PLG/PLAU/THBD/PDGFB/VTN/CD34/SH2B3/NOS3/SERPINE1	15	BP
GO:0007517	muscle organ development	38/415	403/17910	2.04924577252513e-13	1.83548412142839e-12	6.9917218665101e-13	EDN1/IGF1/EP300/FGFR1/BCL2/ASS1/ACTC1/SHH/WNT5A/CTNNB1/TGFB1/HMGCR/MAPK1/CREB1/CXCL10/SIRT1/HAMP/TWIST1/TGFB2/PTEN/DSP/RXRA/SMAD3/RHOA/MTOR/MAPK14/SMAD7/ELN/SMAD4/COL3A1/ENG/PPARA/RBP4/FOS/FGF2/CAV1/TGFBR2/NOTCH1	38	BP
GO:0051052	regulation of DNA metabolic process	38/415	403/17910	2.04924577252513e-13	1.83548412142839e-12	6.9917218665101e-13	FGFR1/BRCA1/FOXP3/PPARGC1A/PDGFRB/CTNNB1/TGFB1/MYC/PTPRC/BRCA2/IL10/MAPK1/EGFR/IL4/SRC/TP53/CDKN1A/SIRT1/TWIST1/HGF/HMGB1/PPARG/PDGFB/PCNA/NOX4/DKC1/TFRC/IL6/HSP90AA1/PIK3CA/IL2/FGF2/MAPK3/NAF1/AKT1/JUN/BAX/ADIPOQ	38	BP
GO:0043235	receptor complex	32/415	292/18675	1.00207706283085e-13	1.98223368991228e-12	1.12404038955698e-12	FGFR1/HSPD1/TF/TFR2/ITGB1/LDLR/TNFRSF1A/B2M/NOTCH2/CD14/EGFR/IKBKB/TLR7/TLR2/IL12RB1/RXRA/SMAD3/CD36/MTTP/CHUK/ADRB2/TFRC/AIP/IL6/VDR/ENG/LYN/TNFRSF1B/TLR4/INSR/TGFBR2/NOTCH1	32	CC
GO:0001823	mesonephros development	20/415	103/17910	2.23381472723111e-13	1.99847103361712e-12	7.61257123513229e-13	FGFR1/BCL2/AGT/RARB/SHH/BMP7/CTNNB1/VEGFA/TGFB1/MYC/SMAD2/CAT/REN/AGTR2/PKD1/PKD2/SMAD3/SMAD7/SMAD4/FGF2	20	BP
GO:0051726	regulation of cell cycle	69/415	1149/17910	2.24363126757484e-13	2.00491933619914e-12	7.63713409440102e-13	EDN1/IGF1/EP300/FGFR1/LEP/BRCA1/BCL2/CYP1A1/PKHD1/HSPA8/PDGFRB/TNF/EGF/IL1A/ITGB1/WNT5A/PTGS2/BMP7/CTNNB1/CCND1/NOTCH2/PSMB8/TGFB1/MYC/TNFAIP3/PTPRC/INS/BRCA2/IL10/MDM2/EGFR/BBS4/TERT/SRC/TP53/CDKN1A/SIRT1/IL1B/TGFB2/PTEN/IRF1/PKD1/PKD2/PTPN11/SMAD3/EZH2/RHOA/CXCL8/MTOR/MAPK14/PDGFB/CALR/PCNA/STAT3/CCL2/HSP90AA1/CASP3/PRKAA2/IGF2/DDIT3/IFNG/ACTB/INSR/AKT1/MIF/CDKN2A/NOTCH1/BAX/PRKCA	69	BP
GO:0036294	cellular response to decreased oxygen levels	28/415	220/17910	2.41141459937534e-13	2.15234857098716e-12	8.19872119428181e-13	EDN1/MPL/EP300/BCL2/NFE2L2/PPARGC1A/CREBBP/PTGS2/BMP7/PSMB8/VEGFA/MYC/HMOX1/MDM2/TERT/SRC/TP53/SIRT1/TWIST1/EPO/PTEN/MTOR/CD34/FABP1/ICAM1/HIF1A/AKT1/NOTCH1	28	BP
GO:1900047	negative regulation of hemostasis	15/415	50/17910	2.4903670213673e-13	2.22024020408442e-12	8.45733384591827e-13	EDN1/APOE/F2/PLAT/APOH/PDGFA/PLG/PLAU/THBD/PDGFB/VTN/CD34/SH2B3/NOS3/SERPINE1	15	BP
GO:0006006	glucose metabolic process	27/415	204/17910	2.50725229042559e-13	2.23270380671154e-12	8.50481017219437e-13	IGF1/EP300/LEP/GPD1/GCK/GAA/PPARGC1A/TNF/FOXO1/IGFBP5/INS/SRC/TP53/SIRT1/IGFBP3/CPT1A/MTOR/MAPK14/SLC25A13/PPARA/RBP4/IGF2/PIK3CA/INSR/AKT1/ALDOB/ADIPOQ	27	BP
GO:0031400	negative regulation of protein modification process	47/415	601/17910	2.69789072272818e-13	2.39968636622292e-12	9.14087975134876e-13	XDH/HSPB1/SEMA4D/BRCA1/FOXP3/APOE/EZR/GSTP1/PPARGC1A/TNF/BMP7/CTNNB1/TGFB1/MYC/TNFAIP3/FOXO1/GCLC/PTPRC/HMGCR/IKBKB/LGALS3/CDKN1A/SIRT1/IL1B/IGFBP3/TWIST1/HGF/PTEN/TSC2/MTOR/SMAD7/ATG5/SMAD4/CASP3/ENG/PRKAA2/LYN/IL2/CAV1/SH2B3/RELA/TLR4/AKT1/CDKN2A/JUN/BAX/ADIPOQ	47	BP
GO:0032735	positive regulation of interleukin-12 production	13/415	34/17910	2.74938478531002e-13	2.44266151157312e-12	9.30458057553656e-13	HSPD1/AGER/CCR7/TLR2/HMGB1/IRF1/CD36/MAPK14/IFNG/RELA/TLR4/TLR9/CD40LG	13	BP
GO:0050871	positive regulation of B cell activation	17/415	70/17910	2.95915719051268e-13	2.62599572853233e-12	1.00029368503899e-12	BCL2/IL5/TGFB1/IL13/PTPRC/MMP14/IL4/CDKN1A/NOD2/TFRC/ADA/IL6/IL2/CD81/TLR4/TLR9/MIF	17	BP
GO:0042594	response to starvation	25/415	174/17910	2.97871863141888e-13	2.64030596106737e-12	1.00574473550366e-12	UGT1A1/BCL2/HSPA8/NFE2L2/PPARGC1A/PCSK9/FOXO1/EIF2AK2/MAPK1/MAPK8/TP53/CDKN1A/SIRT1/ALB/HAMP/SREBF1/FAS/PPARG/MTOR/PRKAA2/DDIT3/HSPA5/GLUL/MAPK3/JUN	25	BP
GO:0032371	regulation of sterol transport	16/415	60/17910	3.05388770124661e-13	2.69760080276784e-12	1.02756947334142e-12	LEP/APOE/EGF/SHH/PCSK9/ANXA2/CETP/NFKB1/SIRT1/NFKBIA/APOC3/PPARG/NR1H2/ABCB4/APOA1/ADIPOQ	16	BP
GO:0032374	regulation of cholesterol transport	16/415	60/17910	3.05388770124661e-13	2.69760080276784e-12	1.02756947334142e-12	LEP/APOE/EGF/SHH/PCSK9/ANXA2/CETP/NFKB1/SIRT1/NFKBIA/APOC3/PPARG/NR1H2/ABCB4/APOA1/ADIPOQ	16	BP
GO:1905953	negative regulation of lipid localization	16/415	60/17910	3.05388770124661e-13	2.69760080276784e-12	1.02756947334142e-12	LEP/CRP/TNF/EGF/SHH/PCSK9/NFKB1/NFKBIA/AGTR2/PTPN11/APOC3/PPARG/NR1H2/IL6/PPARA/AKT1	16	BP
GO:0051702	interaction with symbiont	18/415	81/17910	3.08301029217002e-13	2.72019909246e-12	1.03617760861983e-12	EP300/ELANE/APOE/HSPD1/HSPA8/FN1/SFTPD/F2/ANXA2/PLG/CCL5/ARG1/CAMP/PTX3/SP1/LTF/CCL3/JUN	18	BP
GO:1901566	organonitrogen compound biosynthetic process	92/415	1819/17910	3.11646640904538e-13	2.74656471943965e-12	1.04622079714573e-12	HSPB1/IGF1/ELANE/DGUOK/FOXP3/APOE/AIRE/BCL2/GPD1/GCK/ASS1/ALAD/GSTP1/NFE2L2/PPARGC1A/PDGFRB/TNF/EGF/IL1A/TNFRSF1A/SFTPD/PTGS2/AGER/CBS/CTNNB1/TYMS/TGFB1/VCP/GPT/GCLC/IGFBP5/CCR7/PTPRC/GGT1/EIF2AK2/INS/ASL/ACADM/GSTM1/MAPK1/EGFR/TLR7/IL4/FECH/CCL5/TP53/CPOX/NFKB1/IL1B/AGXT/ALAS2/NME1/AGTR2/TYMP/TGFB2/FASN/FARSB/RXRA/PPARG/RHOA/MTOR/SLC25A13/PDGFB/VIM/CALR/ATG5/STAT3/ARG1/ADA/IL6/PRKAA2/SLC11A2/PPA…	92	BP
GO:0019904	protein domain specific binding	53/412	680/16967	5.03855810498678e-14	2.87993373790297e-12	1.82281354158248e-12	FGFR1/PTK2/BCL2/IRF3/EZR/HSPA8/FN1/NFE2L2/ABCC2/JAK2/WNT5A/CTNNB1/SCNN1B/VCP/SLC22A5/EXOC4/SMAD2/MDM2/SRC/PLG/TP53/SIRT1/IL1B/NOD2/SCNN1G/TWIST1/PTEN/AXIN1/PKD1/TGM2/RXRA/PKD2/PTPN11/CASP8/KRAS/PPARG/RHOA/MTOR/VIM/AIP/HSP90AA1/PPARA/LYN/SP1/DDIT3/HSPA5/RELA/HIF1A/CFTR/INSR/SCNN1A/JUN/BAX	53	MF
GO:0002688	regulation of leukocyte chemotaxis	20/415	105/17910	3.27424980358987e-13	2.88231497601239e-12	1.09793075345553e-12	EDN1/WNT5A/CCR7/CXCL10/CCL5/HMGB1/CSF1/LBP/CXCR2/CXCL8/MAPK14/CALR/CCL2/IL6/LYN/CXCL12/MAPK3/SERPINE1/MIF/CCL3	20	BP
GO:0032649	regulation of interferon-gamma production	19/415	93/17910	3.40633283029722e-13	2.99515649895127e-12	1.14091432025251e-12	FOXP3/HSPD1/TNF/WNT5A/SLC11A1/CCR7/CD14/IL10/TLR7/IL1B/HAVCR2/HMGB1/IL12RB1/IL2/NR1H4/TLR4/TLR9/LTA/CD274	19	BP
GO:0048146	positive regulation of fibroblast proliferation	15/415	51/17910	3.454178932478e-13	3.03029281918874e-12	1.1542984392239e-12	IGF1/AGT/FN1/PDGFRB/WNT5A/ESR1/TGFB1/MYC/IL13/EGFR/PDGFA/CDKN1A/PDGFB/MIF/JUN	15	BP
GO:0050999	regulation of nitric-oxide synthase activity	15/415	51/17910	3.454178932478e-13	3.03029281918874e-12	1.1542984392239e-12	LEP/APOE/TNF/INS/EGFR/TERT/IL1B/AGTR2/KRAS/SCARB1/HSP90AA1/CAV1/HIF1A/NOS3/AKT1	15	BP
GO:0072562	blood microparticle	23/415	147/18675	1.83111310106943e-13	3.51240785750591e-12	1.99173705730359e-12	APOE/C3/TF/ACTC1/AGT/HSPA8/FN1/HP/F2/TGFB1/HBB/PLG/ALB/GSN/VTN/TFRC/ANXA5/ENG/ACTB/SERPINC1/APOA1/CP/PRSS1	23	CC
GO:0002709	regulation of T cell mediated immunity	16/415	61/17910	4.0529350039323e-13	3.55151716137055e-12	1.35284309499319e-12	FOXP3/HSPD1/B2M/AGER/PTPRC/IL1B/HMGB1/IL12RB1/NLRP3/IFNA2/SMAD7/ARG1/IL6/TNFRSF1B/CD81/IFNB1	16	BP
GO:0023061	signal release	39/415	433/17910	4.19886960506386e-13	3.67520648233665e-12	1.39995880250361e-12	EDN1/NOS2/FGFR1/LEP/GNAS/GCK/TFR2/AGT/HSPA8/BMP6/TNF/JAK2/SPP1/HMGCR/INS/SMAD2/EGFR/CREB1/CCL5/IL1B/REN/CPT1A/SREBF1/AGTR2/PTPN11/RAF1/AGTR1/SMAD4/IL6/LYN/RBP4/IFNG/GLUL/HNF4A/HIF1A/CFTR/NR1H4/PRKCA/ADIPOQ	39	BP
GO:0042326	negative regulation of phosphorylation	40/415	454/17910	4.21496369136361e-13	3.685096242108e-12	1.4037260075064e-12	XDH/HSPB1/SEMA4D/APOE/EZR/GSTP1/PPARGC1A/BMP7/TGFB1/MYC/TNFAIP3/FOXO1/PTPRC/HMGCR/CDKN1A/SIRT1/IL1B/IGFBP3/TWIST1/HGF/PTEN/TSC2/RHOA/MTOR/SMAD7/STAT3/SMAD4/CASP3/ENG/PPARA/LYN/IL2/CAV1/SH2B3/TLR4/AKT1/CDKN2A/JUN/BAX/ADIPOQ	40	BP
GO:0071236	cellular response to antibiotic	23/415	147/17910	4.29865901311328e-13	3.75399937679268e-12	1.42997257362058e-12	MET/UGT1A1/NFE2L2/TNFAIP3/FOXO1/IL10/MDM2/SRC/TP53/SIRT1/HGF/PTEN/EZH2/PDGFB/PCNA/ARG1/IL6/FABP1/HSPA5/RELA/CFTR/LCN2/TXN	23	BP
GO:0046631	alpha-beta T cell activation	22/415	133/17910	4.3600955377069e-13	3.80332964895318e-12	1.44876344947283e-12	FOXP3/BCL2/SHH/AGER/PTPRC/INS/HMGB1/IL12RB1/IRF1/NLRP3/RHOA/MTOR/SMAD7/STAT3/ADA/IL6/CD80/IL2/IFNG/CD81/TGFBR2/CD274	22	BP
GO:0010883	regulation of lipid storage	14/415	43/17910	4.39990864954012e-13	3.833707253029e-12	1.4603348793855e-12	LEP/C3/CRP/TNF/LPL/NFKB1/SIRT1/NFKBIA/CD36/PPARG/NR1H2/SCARB1/IL6/PPARA	14	BP
GO:0048598	embryonic morphogenesis	45/415	565/17910	4.77422359738491e-13	4.15514250802979e-12	1.58277592231358e-12	MMP2/EDN1/FGFR1/GNAS/RARB/FN1/SNAI1/CREBBP/ITGB1/SHH/WNT5A/BMP7/CTNNB1/TGFB1/EXOC4/SMAD2/MMP8/IL10/MAPK1/MMP14/SOD1/BBS4/TP53/TWIST1/TGFB2/PKD2/MTHFR/SMAD3/TSC2/VTN/SMAD4/ENG/TGFB3/RBP4/IGF2/FGF2/MAPK3/HNF4A/HIF1A/TGFBR2/APOA1/NOTCH1/BAX/MMP9/ADIPOQ	45	BP
GO:0032677	regulation of interleukin-8 production	17/415	72/17910	4.88178546935575e-13	4.24395037692296e-12	1.61660459517484e-12	ELANE/CRP/TNF/WNT5A/PTPRC/CD14/IL10/TLR7/IL1B/NOD2/TLR2/LBP/DDIT3/TLR4/SERPINE1/TLR9/ADIPOQ	17	BP
GO:0006367	transcription initiation from RNA polymerase II promoter	25/415	178/17910	5.04033724865768e-13	4.37683522665924e-12	1.66722306137579e-12	RARB/TCF4/NR1I3/PPARGC1A/CREBBP/CCND1/NOTCH2/ESR1/CREB1/TP53/CDKN1A/HMGB1/PTEN/RXRA/PPARG/NR3C1/NR1H2/VDR/PPARA/NR5A2/HNF4A/NR1H4/NR1I2/NOTCH1/BAX	25	BP
GO:0019217	regulation of fatty acid metabolic process	19/415	95/17910	5.114601205534e-13	4.4363104136037e-12	1.68987833581918e-12	BRCA1/PPARGC1A/PTGS2/INS/SIRT1/IL1B/CPT1A/SREBF1/TWIST1/APOC3/PPARG/MTOR/NR1H2/PRKAA2/PPARA/FABP1/CAV1/AKT1/ADIPOQ	19	BP
GO:0042593	glucose homeostasis	28/415	227/17910	5.29352950816686e-13	4.58633306316373e-12	1.74702492876189e-12	LEP/GCK/PPARGC1A/AGER/FOXO1/GCLC/IGFBP5/HMGCR/INS/SIRT1/NME1/PTPN11/PPARG/RAF1/STAT3/NOX4/PRKAA2/RBP4/PYGL/PIK3CA/ICAM1/HNF4A/HIF1A/CFTR/NR1H4/INSR/AKT1/ADIPOQ	28	BP
GO:0043500	muscle adaptation	21/415	121/17910	5.65456233820516e-13	4.8881115375823e-12	1.8619783153808e-12	EDN1/IGF1/PTK2/AGT/PPARGC1A/TNFRSF1A/FOXO1/IGFBP5/HMOX1/IL1B/HAMP/SMAD3/EZH2/MTOR/GSN/SMAD4/PPARA/TNFRSF1B/NOS3/NOTCH1/PRKCA	21	BP
GO:1903038	negative regulation of leukocyte cell-cell adhesion	21/415	121/17910	5.65456233820516e-13	4.8881115375823e-12	1.8619783153808e-12	FOXP3/ASS1/SHH/SFTPD/TGFB1/IL10/LGALS3/HAVCR2/HMGB1/IRF1/IFNA2/SMAD7/ARG1/CASP3/PPARA/IL2/CXCL12/AKT1/IFNB1/CEBPB/CD274	21	BP
GO:0038061	NIK/NF-kappaB signaling	25/415	179/17910	5.73540311283964e-13	4.95242392383962e-12	1.88647617466671e-12	EDN1/EP300/TNF/BMP7/AGER/PSMB8/CD14/EIF2AK2/MMP8/EGFR/TLR7/IL1B/NFKBIA/NOD2/TLR2/HAVCR2/NLRP3/RHOA/CALR/CHUK/RBCK1/RELA/TLR4/TLR9/AKT1	25	BP
GO:0009746	response to hexose	26/415	195/17910	5.89524844435743e-13	5.08473448876396e-12	1.93687588443003e-12	GCK/PPARGC1A/PTGS2/AGER/TGFB1/GCLC/HMGCR/SMAD2/LPL/SREBF1/NME1/PTEN/RHOA/RAF1/NOX4/CASP3/PRKAA2/PIK3CA/GLUL/ICAM1/HNF4A/HIF1A/CFTR/NR1H4/TGFBR2/ADIPOQ	26	BP
GO:0033500	carbohydrate homeostasis	28/415	228/17910	5.90791361152292e-13	5.08994575163158e-12	1.93886095747525e-12	LEP/GCK/PPARGC1A/AGER/FOXO1/GCLC/IGFBP5/HMGCR/INS/SIRT1/NME1/PTPN11/PPARG/RAF1/STAT3/NOX4/PRKAA2/RBP4/PYGL/PIK3CA/ICAM1/HNF4A/HIF1A/CFTR/NR1H4/INSR/AKT1/ADIPOQ	28	BP
GO:0001776	leukocyte homeostasis	18/415	84/17910	6.02349760939151e-13	5.1837154678806e-12	1.97457969608272e-12	MPL/FOXP3/BCL2/TGFB1/TNFAIP3/HMGB1/SLC40A1/CXCR2/ADA/IL6/CASP3/LYN/IL2/SH2B3/HIF1A/AKT1/MIF/BAX	18	BP
GO:0032652	regulation of interleukin-1 production	19/415	96/17910	6.24261380703085e-13	5.3662737256188e-12	2.04411974536122e-12	HSPB1/IGF1/GSTP1/JAK2/WNT5A/AGER/TNFAIP3/CCR7/IL10/LPL/NOD2/HAVCR2/HMGB1/NLRP3/SMAD3/NR1H4/TLR4/APOA1/CCL3	19	BP
GO:0032655	regulation of interleukin-12 production	15/415	53/17910	6.49033946161283e-13	5.56056396460364e-12	2.11812873822042e-12	HSPD1/AGER/CCR7/IL10/NFKB1/TLR2/HMGB1/IRF1/CD36/MAPK14/IFNG/RELA/TLR4/TLR9/CD40LG	15	BP
GO:0050819	negative regulation of coagulation	15/415	53/17910	6.49033946161283e-13	5.56056396460364e-12	2.11812873822042e-12	EDN1/APOE/F2/PLAT/APOH/PDGFA/PLG/PLAU/THBD/PDGFB/VTN/CD34/SH2B3/NOS3/SERPINE1	15	BP
GO:0050994	regulation of lipid catabolic process	15/415	53/17910	6.49033946161283e-13	5.56056396460364e-12	2.11812873822042e-12	TNF/LDLR/INS/SCT/IDH1/IL1B/CPT1A/TWIST1/APOC3/MTOR/SCARB1/PPARA/FABP1/PIK3CG/AKT1	15	BP
GO:0006066	alcohol metabolic process	34/415	339/17910	7.00372889710933e-13	5.99372567642374e-12	2.28312859721733e-12	IGF1/FGFR1/LEP/APOE/ALDH2/GPD1/BMP6/TNF/LDLR/PCSK9/HMGCR/SOD1/IL4/AKR1D1/CETP/CAT/NFKB1/IL1B/SREBF1/PTEN/FASN/RXRA/SCARB1/VDR/PRKAA2/TTR/RBP4/SP1/IFNG/FGF2/CFTR/NR1H4/APOA1/CYP3A4	34	BP
GO:0043901	negative regulation of multi-organism process	25/415	182/17910	8.40515815140994e-13	7.18505454878592e-12	2.73692931550507e-12	IGF1/ELANE/TNF/TNFAIP3/STAT1/ANXA2/EIF2AK2/IL10/CCL5/HAVCR2/IFNA2/CD36/LBP/GSN/MPO/CALR/SLPI/CAMP/PTX3/ADA/LTF/LTA/IFNB1/CCL3/JUN	25	BP
GO:0006109	regulation of carbohydrate metabolic process	26/415	198/17910	8.45748553604477e-13	7.22175292716712e-12	2.75090845330298e-12	IGF1/EP300/LEP/GPD1/GCK/PPARGC1A/EGF/TGFB1/FOXO1/IGFBP5/INS/SRC/TP53/NFKB1/SIRT1/IGFBP3/MTOR/PDGFB/STAT3/PRKAA2/PPARA/IGF2/HIF1A/INSR/AKT1/ADIPOQ	26	BP
GO:0042445	hormone metabolic process	27/415	215/17910	9.02391406725795e-13	7.69686788089648e-12	2.93188913149651e-12	FGFR1/UGT1A1/LEP/CYP1A1/BMP6/PPARGC1A/TNF/SHH/SPP1/ESR1/ACE2/AKR1D1/NFKB1/IL1B/REN/PTPN11/AFP/SCARB1/VDR/ACE/TTR/UGT1A9/RBP4/IFNG/HIF1A/APOA1/CYP3A4	27	BP
GO:0045670	regulation of osteoclast differentiation	16/415	64/17910	9.16187512827516e-13	7.80587698013244e-12	2.97341285234371e-12	GNAS/TNF/CTNNB1/NOTCH2/BGLAP/CREB1/IL4/CSF1/IL17A/MTOR/FOS/IFNG/LTF/TLR4/CEBPB/CCL3	16	BP
GO:0008144	drug binding	90/412	1658/16967	1.4451784519433e-13	7.84731899405211e-12	4.96685015325776e-12	ABCA3/ABCB7/CXCR4/NOS2/FGFR1/MET/CYP2D6/CYP2C19/DGUOK/HSPD1/PTK2/GCK/GUCY2C/ASS1/CYP1A1/ACTC1/HSPA8/RARB/GSTP1/TPMT/ATP7B/CYP3A5/PDGFRB/ABCC2/JAK2/CBS/CYP2C9/TYMS/VCP/GPT/GCLC/SLC22A5/ABCD3/EIF2AK2/MAPK1/EGFR/IKBKB/TLR7/MAPK8/SRC/HBB/TP53/ABCB11/ABCC1/AGXT/ALAS2/ALB/NOD2/NME1/NLRP3/FASN/FARSB/NOS1/PPARG/HSPA4/ABCB1/MTOR/MAPK14/RAF1/CHUK/NOX4/CYP2E1/HSP90AA1/VDR/ACE/PRKAA2/PPARA/LYN/PYGL/FABP1/PIK…	90	MF
GO:1904019	epithelial cell apoptotic process	20/415	111/17910	9.79072490049309e-13	8.33241648508188e-12	3.17398215868407e-12	NFE2L2/PPARGC1A/TNF/KRT8/JAK2/IL13/TNFAIP3/HMOX1/IL10/IL4/TERT/MTOR/GSN/CCL2/IL6/PIK3CG/ICAM1/SERPINE1/TGFBR2/CD40LG	20	BP
GO:0034405	response to fluid shear stress	13/415	37/17910	9.90879075715974e-13	8.42356824875803e-12	3.2087036674035e-12	ASS1/NFE2L2/PDGFRB/PTGS2/TGFB1/SRC/PKD1/PKD2/SMAD7/TGFB3/NOS3/AKT1/CSF2	13	BP
GO:0005912	adherens junction	41/415	496/18675	4.53305977758883e-13	8.4394907035698e-12	4.78567611194363e-12	HSPB1/PTK2/ACTC1/EZR/HSPA8/PDGFRB/ITGB1/JAK2/B2M/CTNNB1/PTPRC/ANXA2/MAPK1/MMP14/EGFR/CAT/PLAU/DSP/TGM2/CDH2/KRAS/RHOA/GSN/SMAD7/VIM/CALR/NOX4/ANXA5/ENG/LYN/CDH1/HSPA5/ICAM1/CAV1/MAPK3/HSP90B1/ABCB4/CD81/ACTB/JAK1/NOTCH1	41	CC
GO:0009792	embryo development ending in birth or egg hatching	46/415	600/17910	9.97544309194839e-13	8.47085968636722e-12	3.22671791087042e-12	EDN1/IGF1/EP300/FGFR1/COL1A1/GNAS/EDNRA/SNAI1/ITGB1/KRT8/SHH/WNT5A/BMP7/CTNNB1/VEGFA/TGFB1/SMAD2/BRCA2/IL10/MAPK1/MMP14/EGFR/BBS4/TP53/TWIST1/TGFB2/PKD1/RXRA/PKD2/MTHFR/SMAD3/CASP8/TSC2/PDGFB/SMAD4/ADA/TGFB3/RBP4/IGF2/NR5A2/HIF1A/NOS3/TGFBR2/AKT1/CEBPB/CSF2	46	BP
GO:0019058	viral life cycle	33/415	324/17910	1.00840058821584e-12	8.55359660092572e-12	3.25823403721185e-12	CXCR4/APOE/BCL2/HSPA8/TNF/ITGB1/LDLR/ACE2/MRC1/VCP/CR1/EIF2AK2/SLC10A1/EGFR/CCL5/CLDN1/IFNA2/CXCL8/GSN/ATG5/SLPI/PTX3/SCARB1/TFRC/CCL2/CD80/TOP2A/NR5A2/ICAM1/CAV1/LTF/CD81/IFNB1	33	BP
GO:0019902	phosphatase binding	26/412	177/16967	1.66539277554016e-13	8.61245978207914e-12	5.4511352502643e-12	MET/PTK2/BCL2/CTNNB1/VCP/FOXO1/STAT1/HMGCR/SMAD2/MAPK1/EGFR/SOD1/LGALS3/TP53/SMAD3/TSC2/CDH2/PPARG/MAPK14/STAT3/PPARA/MAPK3/HSP90B1/JAK1/AKT1/KCNN4	26	MF
GO:0044282	small molecule catabolic process	37/415	404/17910	1.04770982003595e-12	8.87723259865081e-12	3.38151338654904e-12	NOS2/LEP/ALDH2/GCK/CYP1A1/CBS/TGFB1/GPT/ABCD3/ACADM/AKR1D1/HADHB/TP53/HADHA/AGXT/CPT1A/TWIST1/TYMP/PTEN/NOS1/MTOR/ARG1/SCARB1/ADA/CPT2/PPARA/FABP1/FGF2/GLUL/FAH/NOS3/MAT1A/AKT1/GPT2/ALDOB/PAH/ADIPOQ	37	BP
GO:0005783	endoplasmic reticulum	88/415	1785/18675	4.93641756861894e-13	8.92786377410226e-12	5.06261170195206e-12	XDH/EDN1/UGT1A1/CYP2D6/CYP2C19/COL1A1/APOE/C3/BCL2/TF/GUCY2C/ASS1/CYP1A1/FN1/CYP3A5/SHH/SPP1/SFTPD/F2/WNT5A/PTGS2/B2M/CYP2C9/NOTCH2/PCSK9/VCP/IGFBP5/HMGCR/HMOX1/INS/BGLAP/PNPLA3/EGFR/TLR7/PDGFA/HADHB/TP53/CAT/IGFBP3/ALB/SREBF1/HLA-C/COL1A2/NLRP3/PKD1/TGM2/NOS1/PKD2/CSF1/CDH2/RHOA/SERPINA1/MTTP/AFP/MTOR/PDGFB/CALR/HLA-A/NOX4/VTN/CYP2E1/UGT1A6/IL6/COL3A1/UGT1A9/CYP1A2/FOS/HSPA5/GLUL/EPHX1/CAV1/HSP9…	88	CC
GO:0030182	neuron differentiation	71/415	1244/17910	1.10957361791698e-12	9.39104983886784e-12	3.57723653075252e-12	CXCR4/EP300/SEMA4D/FGFR1/LEP/DGUOK/APOE/C3/PTK2/BCL2/EZR/AGT/RARB/TCF4/FN1/NFE2L2/BMP6/ITGB1/SHH/JAK2/SPP1/WNT5A/BMP7/B2M/AGER/CTNNB1/VEGFA/PCSK9/NKX2-1/TUBB2B/MAPK1/MDM2/EGFR/SOD1/CREB1/BBS4/SRC/NME1/EPO/HGF/HMGB1/TGFB2/PTEN/PTPN11/EZH2/RHOA/MTOR/VIM/CALR/STAT3/SMAD4/TUBB3/IL6/HSP90AA1/CASP3/SLC11A2/LYN/PIK3CA/IL2/CDH1/HSPA5/CXCL12/MAPK3/HIF1A/VCAM1/AKT1/APOA1/CEBPB/JUN/PRKCA/S100A9	71	BP
GO:0072163	mesonephric epithelium development	19/415	99/17910	1.11817791287485e-12	9.43270829905955e-12	3.59310506176552e-12	FGFR1/BCL2/AGT/RARB/SHH/BMP7/CTNNB1/VEGFA/TGFB1/MYC/SMAD2/CAT/AGTR2/PKD1/PKD2/SMAD3/SMAD7/SMAD4/FGF2	19	BP
GO:0072164	mesonephric tubule development	19/415	99/17910	1.11817791287485e-12	9.43270829905955e-12	3.59310506176552e-12	FGFR1/BCL2/AGT/RARB/SHH/BMP7/CTNNB1/VEGFA/TGFB1/MYC/SMAD2/CAT/AGTR2/PKD1/PKD2/SMAD3/SMAD7/SMAD4/FGF2	19	BP
GO:0098869	cellular oxidant detoxification	19/415	99/17910	1.11817791287485e-12	9.43270829905955e-12	3.59310506176552e-12	SOD2/APOE/GSTP1/NFE2L2/HP/TNF/PTGS2/BMP7/SOD1/HBB/CAT/ALB/CD36/MPO/FABP1/NOS3/TXN/GSTT1/S100A9	19	BP
GO:0051271	negative regulation of cellular component movement	35/415	365/17910	1.17691747307993e-12	9.91733638225799e-12	3.77770947903427e-12	APOE/BCL2/PKHD1/GSTP1/NFE2L2/PPARGC1A/SHH/WNT5A/TGFB1/NKX2-1/IGFBP5/HMOX1/APOH/IL4/IGFBP3/AGTR2/HMGB1/PTEN/PPARG/RHOA/SMAD7/CALR/STAT3/CCL2/ADA/COL3A1/ENG/CDH1/FGF2/CXCL12/SERPINE1/AKT1/MIF/NOTCH1/ADIPOQ	35	BP
GO:0006801	superoxide metabolic process	16/415	65/17910	1.18987687721824e-12	1.00155572852379e-11	3.81512376266089e-12	EDN1/NOS2/SOD2/AGT/CRP/GSTP1/NFE2L2/TNF/BMP7/TGFB1/EGFR/SOD1/CD36/MPO/NOX4/NOS3	16	BP
GO:0043009	chordate embryonic development	45/415	581/17910	1.26268254550308e-12	1.06064159746596e-11	4.04019351786165e-12	EDN1/IGF1/EP300/FGFR1/COL1A1/GNAS/EDNRA/SNAI1/ITGB1/KRT8/SHH/WNT5A/BMP7/CTNNB1/VEGFA/TGFB1/SMAD2/BRCA2/IL10/MAPK1/MMP14/EGFR/BBS4/TP53/TWIST1/TGFB2/PKD1/RXRA/PKD2/MTHFR/SMAD3/CASP8/TSC2/PDGFB/SMAD4/ADA/TGFB3/RBP4/IGF2/HIF1A/NOS3/TGFBR2/AKT1/CEBPB/CSF2	45	BP
GO:0032757	positive regulation of interleukin-8 production	14/415	46/17910	1.26396790190414e-12	1.06064159746596e-11	4.04019351786165e-12	ELANE/TNF/WNT5A/CD14/TLR7/IL1B/NOD2/TLR2/LBP/DDIT3/TLR4/SERPINE1/TLR9/ADIPOQ	14	BP
GO:0014015	positive regulation of gliogenesis	17/415	76/17910	1.26421301662827e-12	1.06064159746596e-11	4.04019351786165e-12	CXCR4/TNF/SHH/AGER/TGFB1/IL1B/TLR2/CSF1/PPARG/MTOR/IL6/LYN/TNFRSF1B/RELA/LTA/CCL3/NOTCH1	17	BP
GO:0048666	neuron development	62/415	1003/17910	1.29081875016801e-12	1.08178212595869e-11	4.12072197005939e-12	CXCR4/EP300/SEMA4D/FGFR1/LEP/DGUOK/APOE/C3/PTK2/BCL2/EZR/AGT/FN1/NFE2L2/ITGB1/SHH/JAK2/SPP1/WNT5A/BMP7/B2M/AGER/CTNNB1/VEGFA/NKX2-1/TUBB2B/MAPK1/MDM2/EGFR/SOD1/CREB1/BBS4/SRC/NME1/EPO/HGF/HMGB1/TGFB2/PTEN/PTPN11/EZH2/RHOA/MTOR/VIM/SMAD4/TUBB3/IL6/HSP90AA1/CASP3/SLC11A2/LYN/PIK3CA/IL2/CDH1/HSPA5/CXCL12/MAPK3/AKT1/APOA1/JUN/PRKCA/S100A9	62	BP
GO:0033365	protein localization to organelle	54/415	798/17910	1.34819510603049e-12	1.12863609911158e-11	4.29919801613437e-12	NOS2/LEP/COL1A1/BCL2/EZR/AGT/HPS4/HSPA8/EGF/SHH/F2/PTGS2/BMP7/ESR1/TGFB1/TNFAIP3/MMP12/INS/BRCA2/MAPK1/MDM2/BBS4/MAPK8/TERT/SRC/TP53/CDKN1A/CAT/IDH1/AGXT/NFKBIA/SREBF1/AGTR2/SMAD3/EZH2/CD36/CASP8/TSC2/HSPA4/MAPK14/CALR/STAT3/DKC1/AIP/HSP90AA1/DDIT3/CDH1/IFNG/HSPA5/GLUL/CD81/AKT1/TXN/BAX	54	BP
GO:0097530	granulocyte migration	19/415	100/17910	1.3514514722263e-12	1.13013107334702e-11	4.30489266853139e-12	EDN1/CCR7/CCL11/LGALS3/CCL5/UMOD/TGFB2/CSF1/LBP/CXCR2/CXCL8/IL17A/MAPK14/S100A8/PECAM1/PIK3CG/MAPK3/CCL3/S100A9	19	BP
GO:0006639	acylglycerol metabolic process	20/415	113/17910	1.38797457085675e-12	1.15941136706893e-11	4.41642709559798e-12	APOE/C3/LDLR/PCSK9/PNPLA3/APOH/CETP/LPL/CAT/SIRT1/CPT1A/SREBF1/PTPN11/APOC3/NR1H2/CYP2E1/SCARB1/FABP1/PIK3CG/CAV1	20	BP
GO:1900407	regulation of cellular response to oxidative stress	18/415	88/17910	1.40721027122992e-12	1.17420314162887e-11	4.47277188901127e-12	HSPB1/SOD2/MET/NFE2L2/TNF/BMP7/CTNNB1/INS/MMP3/IL10/SOD1/SIRT1/HGF/CD36/HIF1A/TLR4/AKT1/TXN	18	BP
GO:0034762	regulation of transmembrane transport	43/415	538/17910	1.45681264801045e-12	1.21427388285904e-11	4.62540926374822e-12	EDN1/IGF1/LEP/C3/BCL2/EDNRA/AGT/NFE2L2/PPARGC1A/TNF/F2/TGFB1/PCSK9/IL13/INS/GPR35/TERT/CXCL10/IL1B/TWIST1/EPO/PTEN/NOS1/PKD2/PTPN11/ABCB1/MTOR/MAPK14/ATG5/ADRB2/CCL2/LYN/PIK3CG/IFNG/CAV1/CFTR/ACTB/INSR/TLR9/AKT1/BAX/MMP9/ADIPOQ	43	BP
GO:0071398	cellular response to fatty acid	15/415	56/17910	1.58397828742975e-12	1.31883782653279e-11	5.02371399594244e-12	EDN1/ASS1/PPARGC1A/LDLR/CREB1/SRC/LPL/CLDN1/CPT1A/SREBF1/NME1/PPARG/PRKAA2/NR1H4/AKT1	15	BP
GO:0048708	astrocyte differentiation	17/415	77/17910	1.58836027935948e-12	1.32105505918589e-11	5.03215987343213e-12	TNF/LDLR/SHH/F2/AGER/MAPK1/EGFR/IL1B/PTPN11/KRAS/VIM/STAT3/S100A8/IL6/MAPK3/TLR4/NOTCH1	17	BP
GO:0072594	establishment of protein localization to organelle	39/415	452/17910	1.62173838760757e-12	1.34735778473127e-11	5.13235215469321e-12	NOS2/LEP/BCL2/AGT/HPS4/HSPA8/SHH/PTGS2/TGFB1/TNFAIP3/MMP12/BRCA2/MAPK1/MAPK8/TERT/TP53/CDKN1A/CAT/IDH1/AGXT/NFKBIA/SREBF1/AGTR2/SMAD3/CD36/CASP8/TSC2/HSPA4/MAPK14/STAT3/DKC1/AIP/HSP90AA1/DDIT3/CDH1/IFNG/HSPA5/AKT1/BAX	39	BP
[truncated: 4,635 more rows]
