# Supplementary material for: Downregulation of UDP-glucose 6-dehydrogenase predicts adverse prognosis in colorectal cancer and promotes tumorigenesis
Source: Research Square preprint supplement (doi:10.21203/rs.3.rs-6043435/v1), 2025-02-26
Supplement: Supplementary file 2 [file 4b678dcc0655517fbb96e1db.xlsx]

## Sheet: Sheet1
ID	Description	GeneRatio	BgRatio	pvalue	p.adjust	qvalue	geneID	Count	one_type	two_type
hsa05200	Pathways in cancer	109/379	530/7914	1.03441774520041e-42	2.96877892872517e-40	1.08886078442148e-40	MMP2/EDN1/CXCR4/IGF1/EP300/NOS2/FGFR1/MET/BIRC5/GNAS/PTK2/BCL2/EDNRA/IL5/AGT/RARB/GSTP1/FN1/NFE2L2/PDGFRB/EGF/CREBBP/ITGB1/SHH/JAK2/F2/XIAP/WNT5A/PTGS2/CTNNB1/CCND1/NOTCH2/ESR1/VEGFA/TGFB1/MYC/IL13/FOXO1/MMP1/STAT1/FH/HMOX1/SMAD2/BRCA2/GSTM1/MAPK1/MDM2/EGFR/IKBKB/PDGFA/IL4/MAPK8/TERT/TP53/CDKN1A/NFKB1/NFKBIA/EPO/HGF/IL12RB1/TGFB2/PTEN/AXIN1/RXRA/SMAD3/IFNA2/FAS/STAT4/CASP8/KRAS/PPARG/RHOA/CXCL8/M…	109	Human Diseases	Cancer: overview
hsa04933	AGE-RAGE signaling pathway in diabetic complications	50/379	100/7914	5.03873208475064e-40	7.23058054161717e-38	2.65196425513192e-38	MMP2/EDN1/COL1A1/BCL2/AGT/FN1/TNF/IL1A/JAK2/AGER/CCND1/VEGFA/TGFB1/FOXO1/STAT1/SMAD2/MAPK1/MAPK8/NFKB1/IL1B/COL1A2/TGFB2/SMAD3/KRAS/CXCL8/SELE/THBD/MAPK14/STAT3/NOX4/AGTR1/SMAD4/CCL2/IL6/CASP3/COL3A1/TGFB3/PIK3CA/ICAM1/MAPK3/RELA/NOS3/SERPINE1/VCAM1/TGFBR2/AKT1/F3/JUN/BAX/PRKCA	50	Human Diseases	Endocrine and metabolic disease
hsa04657	IL-17 signaling pathway	41/379	93/7914	4.19625931447069e-30	4.01442141084363e-28	1.47237168928796e-28	IL5/TNF/PTGS2/IL13/TNFAIP3/MMP1/CCL11/MMP3/MAPK1/CXCL2/IKBKB/IL4/MAPK8/CXCL10/NFKB1/IL1B/NFKBIA/CASP8/CXCL8/IL17A/MAPK14/CSF3/CHUK/S100A8/CCL2/IL6/HSP90AA1/CASP3/FOS/IFNG/MAPK3/HSP90B1/CXCL1/RELA/MUC5AC/LCN2/CEBPB/JUN/S100A9/CSF2/MMP9	41	Organismal Systems	Immune system
hsa05167	Kaposi sarcoma-associated herpesvirus infection	55/379	186/7914	1.54704464493168e-29	1.11000453273848e-27	4.07117011824125e-28	EP300/C3/IRF3/CREBBP/JAK2/TNFRSF1A/PTGS2/CTNNB1/CCND1/VEGFA/MYC/STAT1/EIF2AK2/MAPK1/CXCL2/IKBKB/CREB1/MAPK8/SRC/TP53/CDKN1A/NFKB1/NFKBIA/HLA-C/IFNA2/FAS/CASP8/KRAS/CXCL8/MTOR/MAPK14/RAF1/PDGFB/HLA-A/CHUK/STAT3/IL6/CASP3/LYN/PIK3CG/PIK3CA/FOS/FGF2/ICAM1/MAPK3/CXCL1/RELA/HIF1A/HLA-B/JAK1/AKT1/IFNB1/JUN/BAX/CSF2	55	Human Diseases	Infectious disease: viral
hsa05418	Fluid shear stress and atherosclerosis	48/379	139/7914	2.81726386839085e-29	1.61710946045635e-27	5.93108182819126e-28	MMP2/EDN1/PTK2/BCL2/ASS1/GSTP1/NFE2L2/TNF/IL1A/TNFRSF1A/CTNNB1/VEGFA/HMOX1/GSTM1/PLAT/IKBKB/PDGFA/MAPK8/SRC/TP53/NFKB1/IL1B/RHOA/SELE/THBD/MAPK14/PDGFB/CHUK/CCL2/HSP90AA1/PRKAA2/PECAM1/PIK3CA/FOS/IFNG/ICAM1/CAV1/HSP90B1/RELA/NOS3/GSTM3/ACTB/VCAM1/AKT1/TXN/JUN/GSTT1/MMP9	48	Human Diseases	Cardiovascular disease
hsa05161	Hepatitis B	51/379	162/7914	7.2245816975363e-29	3.45575824532153e-27	1.26747047325198e-27	EP300/BIRC5/BCL2/IRF3/TNF/CREBBP/JAK2/TGFB1/MYC/STAT1/SLC10A1/MAPK1/IKBKB/CREB1/MAPK8/SRC/TP53/CDKN1A/NFKB1/NFKBIA/TLR2/TGFB2/SMAD3/IFNA2/FAS/STAT4/CASP8/KRAS/CXCL8/MAPK14/RAF1/PCNA/CHUK/STAT3/SMAD4/IL6/CASP3/TGFB3/PIK3CA/FOS/MAPK3/RELA/TLR4/TGFBR2/JAK1/AKT1/IFNB1/JUN/BAX/PRKCA/MMP9	51	Human Diseases	Infectious disease: viral
hsa04668	TNF signaling pathway	43/379	112/7914	1.67460933782269e-28	6.86589828507302e-27	2.51820953056043e-27	EDN1/TNF/TNFRSF1A/PTGS2/TNFAIP3/MMP3/MAPK1/MMP14/CXCL2/IKBKB/CREB1/MAPK8/CXCL10/CCL5/NFKB1/IL1B/NFKBIA/NOD2/IRF1/FAS/CSF1/CASP8/SELE/MAPK14/CHUK/CCL2/IL6/CASP3/PIK3CA/FOS/ICAM1/TNFRSF1B/MAPK3/CXCL1/RELA/VCAM1/AKT1/LTA/IFNB1/CEBPB/JUN/CSF2/MMP9	43	Environmental Information Processing	Signal transduction
hsa05142	Chagas disease (American trypanosomiasis)	41/379	102/7914	3.76187092700275e-28	1.34957119506224e-26	4.94983016710888e-27	NOS2/GNAS/C3/TNF/TNFRSF1A/TGFB1/SMAD2/IL10/MAPK1/IKBKB/MAPK8/CCL5/NFKB1/IL1B/NFKBIA/TLR2/TGFB2/FAS/CASP8/CXCL8/MAPK14/CALR/CHUK/CCL2/IL6/ACE/TGFB3/PIK3CA/IL2/FOS/IFNG/MAPK3/RELA/TLR4/SERPINE1/TGFBR2/TLR9/AKT1/IFNB1/CCL3/JUN	41	Human Diseases	Infectious disease: parasitic
hsa05163	Human cytomegalovirus infection	56/379	225/7914	7.65541390416094e-26	2.44122643388243e-24	8.95370047270285e-25	CXCR4/GNAS/PTK2/IRF3/TNF/TNFRSF1A/PTGS2/B2M/CTNNB1/CCND1/VEGFA/MYC/MAPK1/MDM2/EGFR/IKBKB/CREB1/SRC/CCL5/TP53/CDKN1A/NFKB1/IL1B/NFKBIA/HLA-C/IFNA2/FAS/CXCR2/CASP8/TSC2/KRAS/RHOA/CXCL8/MTOR/MAPK14/RAF1/CALR/HLA-A/CHUK/STAT3/CCL2/IL6/CASP3/SP1/PIK3CA/CXCL12/MAPK3/RELA/HLA-B/JAK1/AKT1/IFNB1/CDKN2A/CCL3/BAX/PRKCA	56	Human Diseases	Infectious disease: viral
hsa05215	Prostate cancer	38/379	97/7914	1.17347421781498e-25	3.36787100512899e-24	1.23523601875261e-24	IGF1/EP300/FGFR1/BCL2/GSTP1/PDGFRB/EGF/CREBBP/CTNNB1/CCND1/FOXO1/INS/MMP3/MAPK1/PLAT/MDM2/EGFR/IKBKB/CREB1/PDGFA/TP53/CDKN1A/NFKB1/NFKBIA/PLAU/PTEN/KRAS/MTOR/RAF1/PDGFB/CHUK/HSP90AA1/PIK3CA/MAPK3/HSP90B1/RELA/AKT1/MMP9	38	Human Diseases	Cancer: specific types
hsa05205	Proteoglycans in cancer	52/379	204/7914	1.50273760571913e-24	3.92077902583083e-23	1.43802641695611e-23	MMP2/IGF1/FGFR1/MET/COL1A1/PTK2/EZR/FN1/TNF/ITGB1/SHH/WNT5A/CTNNB1/CCND1/ESR1/VEGFA/TGFB1/MYC/SMAD2/MAPK1/MDM2/EGFR/SRC/TP53/CDKN1A/TLR2/TWIST1/COL1A2/HGF/TGFB2/PLAU/PTPN11/FAS/KRAS/RHOA/MTOR/MAPK14/RAF1/STAT3/VTN/CASP3/IGF2/PIK3CA/FGF2/CAV1/MAPK3/HIF1A/ACTB/TLR4/AKT1/PRKCA/MMP9	52	Human Diseases	Cancer: overview
hsa05212	Pancreatic cancer	31/379	75/7914	6.07732774705945e-22	1.34751371084537e-20	4.94228392021041e-21	EGF/CCND1/VEGFA/TGFB1/STAT1/SMAD2/BRCA2/MAPK1/EGFR/IKBKB/MAPK8/TP53/CDKN1A/NFKB1/TGFB2/SMAD3/KRAS/MTOR/RAF1/CHUK/STAT3/SMAD4/TGFB3/PIK3CA/MAPK3/RELA/TGFBR2/JAK1/AKT1/CDKN2A/BAX	31	Human Diseases	Cancer: specific types
hsa05152	Tuberculosis	46/379	179/7914	6.10372064145985e-22	1.34751371084537e-20	4.94228392021041e-21	EP300/NOS2/C3/HSPD1/BCL2/TNF/IL1A/CREBBP/JAK2/TNFRSF1A/TGFB1/MRC1/STAT1/CR1/CD14/IL10/MAPK1/CREB1/MAPK8/SRC/NFKB1/IL1B/NOD2/TLR2/TGFB2/IFNA2/LBP/CASP8/RHOA/MAPK14/RAF1/CAMP/IL6/CASP3/VDR/TGFB3/IFNG/MAPK3/RELA/TLR4/TLR9/JAK1/AKT1/IFNB1/CEBPB/BAX	46	Human Diseases	Infectious disease: bacterial
hsa05144	Malaria	25/379	49/7914	1.02774933450207e-20	2.10688613572925e-19	7.72743860527876e-20	MET/TNF/TGFB1/CR1/IL10/HBB/IL1B/TLR2/HGF/TGFB2/CD36/CXCL8/SELE/CSF3/CCL2/IL6/PECAM1/TGFB3/IFNG/ICAM1/CD81/TLR4/VCAM1/TLR9/CD40LG	25	Human Diseases	Infectious disease: parasitic
hsa04151	PI3K-Akt signaling pathway	62/379	354/7914	6.72883765796737e-20	1.28745093855776e-18	4.72199133892447e-19	IGF1/FGFR1/MET/BRCA1/COL1A1/PTK2/BCL2/FN1/PDGFRB/EGF/ITGB1/JAK2/SPP1/CCND1/VEGFA/MYC/INS/MAPK1/MDM2/EGFR/IKBKB/CREB1/PDGFA/IL4/TP53/CDKN1A/NFKB1/TLR2/EPO/COL1A2/HGF/PTEN/RXRA/IFNA2/CSF1/TSC2/KRAS/MTOR/RAF1/PDGFB/CSF3/CHUK/VTN/IL6/HSP90AA1/PRKAA2/IGF2/PIK3CG/FGF7/PIK3CA/IL2/FGF2/MAPK3/HSP90B1/RELA/NOS3/TLR4/INSR/JAK1/AKT1/IFNB1/PRKCA	62	Environmental Information Processing	Signal transduction
hsa05321	Inflammatory bowel disease (IBD)	27/379	65/7914	2.55808990636639e-19	4.58857376954471e-18	1.68295388576736e-18	FOXP3/IL5/TNF/IL1A/TGFB1/IL13/STAT1/SMAD2/IL10/IL4/NFKB1/IL1B/NOD2/TLR2/IL12RB1/TGFB2/SMAD3/STAT4/IL17A/STAT3/IL6/TGFB3/IL2/IFNG/RELA/TLR4/JUN	27	Human Diseases	Immune disease
hsa04620	Toll-like receptor signaling pathway	33/379	104/7914	4.48410986043484e-19	7.57023252908705e-18	2.77653861327235e-18	IRF3/TNF/SPP1/STAT1/CD14/MAPK1/IKBKB/TLR7/MAPK8/CXCL10/CCL5/NFKB1/IL1B/NFKBIA/TLR2/IFNA2/LBP/CASP8/CXCL8/MAPK14/CHUK/IL6/CD80/PIK3CA/FOS/MAPK3/RELA/TLR4/TLR9/AKT1/IFNB1/CCL3/JUN	33	Organismal Systems	Immune system
hsa05145	Toxoplasmosis	34/379	112/7914	6.17357465462649e-19	9.84342181043224e-18	3.61027757580497e-18	NOS2/BCL2/HSPA8/TNF/ITGB1/LDLR/JAK2/TNFRSF1A/XIAP/TGFB1/STAT1/IL10/MAPK1/IKBKB/MAPK8/NFKB1/NFKBIA/TLR2/TGFB2/ALOX5/CASP8/MAPK14/CHUK/STAT3/CASP3/TGFB3/PIK3CG/IFNG/MAPK3/RELA/TLR4/JAK1/AKT1/CD40LG	34	Human Diseases	Infectious disease: parasitic
hsa05166	Human T-cell leukemia virus 1 infection	47/379	219/7914	6.78123468760939e-19	1.02432334491784e-17	3.75691672443733e-18	EP300/MMP7/TNF/CREBBP/TNFRSF1A/XIAP/B2M/CCND1/TGFB1/MYC/SMAD2/MAPK1/IKBKB/CREB1/MAPK8/TERT/TP53/CDKN1A/NFKB1/NFKBIA/HLA-C/TGFB2/PTEN/SMAD3/KRAS/CALR/HLA-A/CHUK/SMAD4/IL6/TGFB3/PIK3CA/IL2/FOS/ICAM1/MAPK3/RELA/TGFBR2/HLA-B/JAK1/CANX/AKT1/LTA/CDKN2A/JUN/BAX/CSF2	47	Human Diseases	Infectious disease: viral
hsa05210	Colorectal cancer	30/379	86/7914	9.14113855405522e-19	1.31175338250692e-17	4.81112555476591e-18	BIRC5/BCL2/EGF/CTNNB1/CCND1/TGFB1/MYC/SMAD2/MAPK1/EGFR/MAPK8/TP53/CDKN1A/TGFB2/AXIN1/SMAD3/KRAS/RHOA/MTOR/RAF1/SMAD4/CASP3/TGFB3/PIK3CA/FOS/MAPK3/TGFBR2/AKT1/JUN/BAX	30	Human Diseases	Cancer: specific types
hsa05164	Influenza A	41/379	170/7914	1.53398058768599e-18	2.09644013650419e-17	7.68912575281199e-18	EP300/IRF3/TNF/IL1A/CREBBP/JAK2/TNFRSF1A/STAT1/EIF2AK2/MAPK1/IKBKB/TLR7/CXCL10/PLG/CCL5/NFKB1/IL1B/NFKBIA/NLRP3/IFNA2/FAS/CASP8/CXCL8/RAF1/CHUK/CCL2/IL6/CASP3/PIK3CA/IFNG/ICAM1/MAPK3/RELA/ACTB/TLR4/JAK1/AKT1/IFNB1/BAX/PRKCA/PRSS1	41	Human Diseases	Infectious disease: viral
hsa05160	Hepatitis C	39/379	155/7914	2.25042175336494e-18	2.93577746916244e-17	1.07675681979184e-17	IRF3/TNF/EGF/LDLR/TNFRSF1A/CTNNB1/CCND1/MYC/STAT1/EIF2AK2/MAPK1/EGFR/IKBKB/CXCL10/TP53/CDKN1A/CLDN1/NFKB1/NFKBIA/RXRA/IFNA2/FAS/CASP8/KRAS/RAF1/CHUK/STAT3/SCARB1/CASP3/PPARA/PIK3CA/IFNG/MAPK3/CD81/RELA/JAK1/AKT1/IFNB1/BAX	39	Human Diseases	Infectious disease: viral
hsa01522	Endocrine resistance	31/379	98/7914	6.1330349522251e-18	7.65296100560262e-17	2.80688098500005e-17	MMP2/IGF1/CYP2D6/GNAS/PTK2/BCL2/CCND1/NOTCH2/ESR1/MAPK1/MDM2/EGFR/MAPK8/SRC/TP53/CDKN1A/ABCB11/KRAS/MTOR/MAPK14/RAF1/SP1/PIK3CA/FOS/MAPK3/AKT1/CDKN2A/JUN/NOTCH1/BAX/MMP9	31	Human Diseases	Drug resistance: antineoplastic
hsa04659	Th17 cell differentiation	32/379	107/7914	1.1449882270957e-17	1.36921508823528e-16	5.02187818901623e-17	FOXP3/JAK2/TGFB1/STAT1/SMAD2/MAPK1/IKBKB/IL4/MAPK8/NFKB1/IL1B/NFKBIA/IL12RB1/RXRA/SMAD3/IL17A/MTOR/MAPK14/CHUK/STAT3/SMAD4/IL6/HSP90AA1/IL2/FOS/IFNG/MAPK3/RELA/HIF1A/TGFBR2/JAK1/JUN	32	Organismal Systems	Immune system
hsa04068	FoxO signaling pathway	35/379	131/7914	1.7341447555483e-17	1.99079817936945e-16	7.30166212862441e-17	IGF1/EP300/SOD2/EGF/CREBBP/CCND1/TGFB1/FOXO1/INS/IL10/MAPK1/MDM2/EGFR/IKBKB/MAPK8/CDKN1A/CAT/SIRT1/TGFB2/PTEN/SMAD3/KRAS/MAPK14/RAF1/CHUK/STAT3/SMAD4/IL6/PRKAA2/TGFB3/PIK3CA/MAPK3/INSR/TGFBR2/AKT1	35	Environmental Information Processing	Signal transduction
hsa04066	HIF-1 signaling pathway	32/379	109/7914	2.10971874487113e-17	2.32880492222313e-16	8.54137143672522e-17	EDN1/IGF1/EP300/NOS2/BCL2/TF/EGF/CREBBP/VEGFA/HMOX1/INS/MAPK1/EGFR/CDKN1A/NFKB1/EPO/MTOR/STAT3/TFRC/IL6/PIK3CA/IFNG/MAPK3/RELA/HIF1A/NOS3/TLR4/SERPINE1/INSR/AKT1/ALDOB/PRKCA	32	Environmental Information Processing	Signal transduction
hsa05165	Human papillomavirus infection	56/379	330/7914	2.35940965402319e-17	2.50796507668391e-16	9.19847818332628e-17	EP300/COL1A1/GNAS/PTK2/IRF3/FN1/PDGFRB/TNF/EGF/CREBBP/ITGB1/TNFRSF1A/SPP1/WNT5A/PTGS2/CTNNB1/CCND1/NOTCH2/VEGFA/FOXO1/STAT1/EIF2AK2/MAPK1/MDM2/EGFR/IKBKB/CREB1/TERT/TP53/CDKN1A/NFKB1/HLA-C/COL1A2/PTEN/AXIN1/IRF1/IFNA2/FAS/CASP8/TSC2/KRAS/MTOR/RAF1/HLA-A/CHUK/VTN/CASP3/PIK3CA/MAPK3/RELA/HLA-B/JAK1/AKT1/IFNB1/NOTCH1/BAX	56	Human Diseases	Infectious disease: viral
hsa05235	PD-L1 expression and PD-1 checkpoint pathway in cancer	29/379	89/7914	3.00461030698819e-17	3.0633619697791e-16	1.12355106171982e-16	EGF/JAK2/STAT1/MAPK1/EGFR/IKBKB/NFKB1/NFKBIA/TLR2/PTEN/PTPN11/KRAS/MTOR/MAPK14/RAF1/CHUK/STAT3/PIK3CA/FOS/IFNG/MAPK3/RELA/HIF1A/TLR4/TLR9/JAK1/AKT1/JUN/CD274	29	Human Diseases	Cancer: overview
hsa05140	Leishmaniasis	27/379	76/7914	3.09538317503811e-17	3.0633619697791e-16	1.12355106171982e-16	NOS2/C3/TNF/IL1A/ITGB1/JAK2/PTGS2/TGFB1/STAT1/CR1/IL10/MAPK1/IL4/NFKB1/IL1B/NFKBIA/TLR2/TGFB2/MAPK14/TGFB3/FOS/IFNG/MAPK3/RELA/TLR4/JAK1/JUN	27	Human Diseases	Infectious disease: parasitic
hsa05219	Bladder cancer	20/379	41/7914	2.62918279332999e-16	2.51525153895236e-15	9.22520278361402e-16	MMP2/EGF/CCND1/VEGFA/MYC/MMP1/MAPK1/MDM2/EGFR/SRC/TP53/CDKN1A/TYMP/KRAS/CXCL8/RAF1/CDH1/MAPK3/CDKN2A/MMP9	20	Human Diseases	Cancer: specific types
hsa04630	Jak-STAT signaling pathway	37/379	162/7914	5.42839764278929e-16	5.0256455596146e-15	1.84325896189789e-15	MPL/EP300/LEP/BCL2/IL5/PDGFRB/EGF/CREBBP/THPO/JAK2/CCND1/MYC/IL13/STAT1/IL10/EGFR/PDGFA/IL4/CDKN1A/EPO/IL12RB1/PTPN11/IFNA2/STAT4/MTOR/RAF1/PDGFB/CSF3/STAT3/IL6/PIK3CA/IL2/IFNG/JAK1/AKT1/IFNB1/CSF2	37	Environmental Information Processing	Signal transduction
hsa04926	Relaxin signaling pathway	33/379	129/7914	6.20733164607283e-16	5.56720057007157e-15	2.04188540989238e-15	MMP2/EDN1/NOS2/COL1A1/GNAS/VEGFA/TGFB1/MMP1/SMAD2/MAPK1/EGFR/CREB1/MAPK8/SRC/NFKB1/NFKBIA/COL1A2/NOS1/KRAS/MAPK14/RAF1/COL3A1/PIK3CA/FOS/MAPK3/RELA/NOS3/TGFBR2/AKT1/ACTA2/JUN/PRKCA/MMP9	33	Organismal Systems	Endocrine system
hsa05162	Measles	34/379	138/7914	7.61642984172994e-16	6.6239859532621e-15	2.42948320310365e-15	BCL2/IRF3/HSPA8/IL1A/CCND1/TNFAIP3/STAT1/EIF2AK2/IKBKB/TLR7/MAPK8/TP53/NFKB1/IL1B/NFKBIA/TLR2/IFNA2/FAS/CASP8/CHUK/STAT3/IL6/CASP3/PIK3CA/IL2/FOS/RELA/TLR4/TLR9/JAK1/AKT1/IFNB1/JUN/BAX	34	Human Diseases	Infectious disease: viral
hsa05218	Melanoma	25/379	72/7914	8.98375496148652e-16	7.58334609984304e-15	2.78134828528995e-15	IGF1/FGFR1/MET/PDGFRB/EGF/CCND1/MAPK1/MDM2/EGFR/PDGFA/TP53/CDKN1A/HGF/PTEN/KRAS/RAF1/PDGFB/FGF7/PIK3CA/CDH1/FGF2/MAPK3/AKT1/CDKN2A/BAX	25	Human Diseases	Cancer: specific types
hsa01521	EGFR tyrosine kinase inhibitor resistance	26/379	79/7914	1.05379354516197e-15	8.64110707032816e-15	3.16930389522397e-15	IGF1/MET/BCL2/PDGFRB/EGF/JAK2/VEGFA/MAPK1/EGFR/PDGFA/SRC/HGF/PTEN/KRAS/MTOR/RAF1/PDGFB/STAT3/IL6/PIK3CA/FGF2/MAPK3/JAK1/AKT1/BAX/PRKCA	26	Human Diseases	Drug resistance: antineoplastic
hsa05226	Gastric cancer	35/379	149/7914	1.38265275613135e-15	1.10228150280471e-14	4.04284431617353e-15	MET/BCL2/RARB/EGF/SHH/WNT5A/CTNNB1/CCND1/TGFB1/MYC/SMAD2/MAPK1/EGFR/TERT/TP53/CDKN1A/HGF/TGFB2/AXIN1/RXRA/SMAD3/KRAS/ABCB1/MTOR/RAF1/SMAD4/TGFB3/FGF7/PIK3CA/CDH1/FGF2/MAPK3/TGFBR2/AKT1/BAX	35	Human Diseases	Cancer: specific types
hsa05146	Amoebiasis	29/379	102/7914	1.83714300690151e-15	1.42502714319117e-14	5.22658038947799e-15	HSPB1/NOS2/COL1A1/GNAS/PTK2/FN1/TNF/TGFB1/CD14/IL10/CXCL2/NFKB1/IL1B/TLR2/COL1A2/TGFB2/CXCL8/ARG1/IL6/CASP3/COL3A1/TGFB3/PIK3CA/IFNG/CXCL1/RELA/TLR4/PRKCA/CSF2	29	Human Diseases	Infectious disease: parasitic
hsa05225	Hepatocellular carcinoma	37/379	168/7914	1.90669278918287e-15	1.44005481709338e-14	5.28169747696085e-15	MET/GSTP1/NFE2L2/WNT5A/CTNNB1/CCND1/TGFB1/MYC/HMOX1/SMAD2/GSTM1/MAPK1/EGFR/TERT/TP53/CDKN1A/HGF/TGFB2/PTEN/AXIN1/SMAD3/KRAS/MTOR/RAF1/SMAD4/TGFB3/IGF2/PIK3CA/MAPK3/GSTM3/ACTB/TGFBR2/AKT1/CDKN2A/BAX/GSTT1/PRKCA	37	Human Diseases	Cancer: specific types
hsa05220	Chronic myeloid leukemia	25/379	76/7914	3.8645962554876e-15	2.84394647519216e-14	1.04307591241231e-14	CCND1/TGFB1/MYC/MAPK1/MDM2/IKBKB/TP53/CDKN1A/NFKB1/NFKBIA/TGFB2/PTPN11/SMAD3/KRAS/RAF1/CHUK/SMAD4/TGFB3/PIK3CA/MAPK3/RELA/TGFBR2/AKT1/CDKN2A/BAX	25	Human Diseases	Cancer: specific types
hsa05169	Epstein-Barr virus infection	40/379	201/7914	5.13442760001094e-15	3.68395180300785e-14	1.35116515789762e-14	BCL2/IRF3/TNF/B2M/CCND1/MYC/TNFAIP3/STAT1/EIF2AK2/MDM2/IKBKB/MAPK8/CXCL10/TP53/CDKN1A/NFKB1/NFKBIA/HLA-C/TLR2/IFNA2/FAS/CASP8/MAPK14/VIM/CALR/HLA-A/CHUK/STAT3/IL6/CASP3/LYN/PIK3CA/ICAM1/RELA/HLA-B/JAK1/AKT1/IFNB1/JUN/BAX	40	Human Diseases	Infectious disease: viral
hsa05323	Rheumatoid arthritis	27/379	93/7914	1.00199997344468e-14	7.01399981411276e-14	2.5725288150056e-14	TNF/IL1A/VEGFA/TGFB1/MMP1/MMP3/CXCL2/CCL5/IL1B/TLR2/TGFB2/CSF1/CXCL8/IL17A/CCL2/IL6/TGFB3/CD80/FOS/IFNG/CXCL12/ICAM1/CXCL1/TLR4/CCL3/JUN/CSF2	27	Human Diseases	Immune disease
hsa04625	C-type lectin receptor signaling pathway	28/379	104/7914	2.65081046300014e-14	1.80523871652916e-13	6.62108460124395e-14	TNF/PTGS2/STAT1/IL10/MAPK1/MDM2/IKBKB/MAPK8/SRC/NFKB1/IL1B/NFKBIA/IRF1/NLRP3/PTPN11/CASP8/KRAS/RHOA/MAPK14/RAF1/CHUK/IL6/PIK3CA/IL2/MAPK3/RELA/AKT1/JUN	28	Organismal Systems	Immune system
hsa05135	Yersinia infection	30/379	120/7914	2.70471305960815e-14	1.80523871652916e-13	6.62108460124395e-14	PTK2/IRF3/FN1/TNF/ITGB1/IL10/MAPK1/IKBKB/MAPK8/SRC/NFKB1/IL1B/NFKBIA/NLRP3/RHOA/CXCL8/MAPK14/CHUK/CCL2/IL6/PIK3CA/IL2/FOS/MAPK3/RELA/ACTB/TLR4/AKT1/IFNB1/JUN	30	Human Diseases	Infectious disease: bacterial
hsa05133	Pertussis	24/379	76/7914	3.94215762647323e-14	2.57136190635867e-13	9.43099910639529e-14	NOS2/C3/IRF3/TNF/IL1A/ITGB1/CD14/IL10/MAPK1/MAPK8/NFKB1/IL1B/IRF1/NLRP3/RHOA/CXCL8/MAPK14/IL6/CASP3/FOS/MAPK3/RELA/TLR4/JUN	24	Human Diseases	Infectious disease: bacterial
hsa04931	Insulin resistance	28/379	108/7914	7.52832052660959e-14	4.80139553585989e-13	1.76101064949932e-13	AGT/PPARGC1A/TNF/TNFRSF1A/FOXO1/INS/IKBKB/CREB1/MAPK8/NFKB1/NFKBIA/CPT1A/SREBF1/PTEN/PTPN11/CD36/MTOR/NR1H2/STAT3/IL6/PRKAA2/PPARA/PYGL/PIK3CA/RELA/NOS3/INSR/AKT1	28	Human Diseases	Endocrine and metabolic disease
hsa04218	Cellular senescence	34/379	160/7914	8.58386770057149e-14	5.3555870218783e-13	1.9642717850278e-13	IL1A/CCND1/TGFB1/MYC/FOXO1/SMAD2/MAPK1/MDM2/TP53/CDKN1A/NFKB1/SIRT1/IGFBP3/HLA-C/TGFB2/PTEN/SMAD3/TSC2/KRAS/CXCL8/MTOR/MAPK14/RAF1/HLA-A/IL6/TGFB3/PIK3CA/MAPK3/RELA/SERPINE1/TGFBR2/HLA-B/AKT1/CDKN2A	34	Cellular Processes	Cell growth and death
hsa04621	NOD-like receptor signaling pathway	36/379	181/7914	1.31488672060183e-13	8.02920188963247e-13	2.94487507413624e-13	BCL2/IRF3/TNF/XIAP/TNFAIP3/STAT1/MAPK1/CXCL2/IKBKB/MAPK8/CCL5/NFKB1/IL1B/NFKBIA/NOD2/NLRP3/IFNA2/CASP8/RHOA/CXCL8/MAPK14/ATG5/CHUK/CAMP/CCL2/IL6/HSP90AA1/RBCK1/MAPK3/CXCL1/RELA/TLR4/JAK1/TXN/IFNB1/JUN	36	Organismal Systems	Immune system
hsa01524	Platinum drug resistance	23/379	73/7914	1.43803141185029e-13	8.59822948335487e-13	3.15357765756643e-13	BRCA1/BIRC5/BCL2/GSTP1/ATP7B/ABCC2/XIAP/GSTM1/MAPK1/MDM2/TP53/CDKN1A/FAS/CASP8/CASP3/PIK3CA/TOP2A/MAPK3/GSTM3/AKT1/CDKN2A/BAX/GSTT1	23	Human Diseases	Drug resistance: antineoplastic
hsa04920	Adipocytokine signaling pathway	22/379	69/7914	3.7543723354904e-13	2.19898951078723e-12	8.06524669278281e-13	LEP/PPARGC1A/TNF/JAK2/TNFRSF1A/IKBKB/MAPK8/NFKB1/NFKBIA/CPT1A/RXRA/PTPN11/CD36/MTOR/CHUK/STAT3/PRKAA2/PPARA/TNFRSF1B/RELA/AKT1/ADIPOQ	22	Organismal Systems	Endocrine system
hsa04060	Cytokine-cytokine receptor interaction	46/379	294/7914	4.84210672056963e-13	2.77936925760697e-12	1.01939088854098e-12	CXCR4/MPL/LEP/IL5/BMP6/TNF/IL1A/THPO/TNFRSF1A/BMP7/TGFB1/IL13/CCR7/CCL11/CXCR1/IL10/CXCL2/IL4/CXCL10/CCL5/IL1B/EPO/IL12RB1/TGFB2/IFNA2/FAS/CSF1/TNFRSF11B/CXCR2/CXCL8/IL17A/CSF3/CCL2/IL6/TGFB3/IL2/IFNG/CXCL12/TNFRSF1B/CXCL1/TGFBR2/LTA/IFNB1/CCL3/CD40LG/CSF2	46	Environmental Information Processing	Signaling molecules and interaction
hsa04010	MAPK signaling pathway	46/379	295/7914	5.4930617705497e-13	3.09119358460346e-12	1.13375887937042e-12	HSPB1/IGF1/FGFR1/MET/HSPA8/PDGFRB/TNF/EGF/IL1A/TNFRSF1A/VEGFA/TGFB1/MYC/CD14/INS/MAPK1/EGFR/IKBKB/PDGFA/MAPK8/TP53/NFKB1/IL1B/HGF/TGFB2/FAS/CSF1/KRAS/MAPK14/RAF1/PDGFB/CHUK/CASP3/TGFB3/IGF2/FGF7/DDIT3/FOS/FGF2/MAPK3/RELA/INSR/TGFBR2/AKT1/JUN/PRKCA	46	Environmental Information Processing	Signal transduction
hsa05170	Human immunodeficiency virus 1 infection	37/379	212/7914	3.92140925972628e-12	2.16431626450277e-11	7.93807542454712e-12	CXCR4/PTK2/BCL2/IRF3/TNF/TNFRSF1A/B2M/MAPK1/IKBKB/MAPK8/NFKB1/NFKBIA/HLA-C/TLR2/IFNA2/FAS/CASP8/KRAS/MTOR/MAPK14/RAF1/CALR/HLA-A/CHUK/CASP3/PIK3CA/FOS/TNFRSF1B/MAPK3/RELA/TLR4/HLA-B/AKT1/IFNB1/JUN/BAX/PRKCA	37	Human Diseases	Infectious disease: viral
hsa05134	Legionellosis	19/379	56/7914	4.47933303229276e-12	2.42560109484533e-11	8.89639132530837e-12	C3/HSPD1/HSPA8/TNF/VCP/CR1/CD14/CXCL2/NFKB1/IL1B/NFKBIA/TLR2/CASP8/CXCL8/IL6/CASP3/CXCL1/RELA/TLR4	19	Human Diseases	Infectious disease: bacterial
hsa04064	NF-kappa B signaling pathway	25/379	102/7914	6.66485392949382e-12	3.54224644030505e-11	1.2991917991216e-11	BCL2/TNF/TNFRSF1A/XIAP/PTGS2/TNFAIP3/CD14/CXCL2/IKBKB/NFKB1/IL1B/NFKBIA/PLAU/LBP/CXCL8/CHUK/LYN/CXCL12/ICAM1/CXCL1/RELA/TLR4/VCAM1/LTA/CD40LG	25	Environmental Information Processing	Signal transduction
hsa04380	Osteoclast differentiation	28/379	128/7914	6.94760058493191e-12	3.6253843052281e-11	1.32968432247501e-11	TNF/IL1A/TNFRSF1A/TGFB1/STAT1/MAPK1/IKBKB/CREB1/MAPK8/NFKB1/IL1B/NFKBIA/TGFB2/CSF1/TNFRSF11B/PPARG/MAPK14/CHUK/PIK3CA/FOS/IFNG/MAPK3/RELA/TGFBR2/JAK1/AKT1/IFNB1/JUN	28	Organismal Systems	Development and regeneration
hsa05224	Breast cancer	30/379	147/7914	7.94575739900496e-12	4.07220066699004e-11	1.49356342086559e-11	IGF1/FGFR1/BRCA1/EGF/WNT5A/CTNNB1/CCND1/NOTCH2/ESR1/MYC/BRCA2/MAPK1/EGFR/TP53/CDKN1A/PTEN/AXIN1/KRAS/MTOR/RAF1/FGF7/SP1/PIK3CA/FOS/FGF2/MAPK3/AKT1/JUN/NOTCH1/BAX	30	Human Diseases	Cancer: specific types
hsa04660	T cell receptor signaling pathway	25/379	104/7914	1.06045705732473e-11	5.25171430455881e-11	1.92617432773109e-11	IL5/TNF/PTPRC/IL10/MAPK1/IKBKB/IL4/MAPK8/NFKB1/NFKBIA/KRAS/RHOA/MAPK14/RAF1/CHUK/PIK3CA/IL2/FOS/IFNG/MAPK3/RELA/AKT1/JUN/CD40LG/CSF2	25	Organismal Systems	Immune system
hsa05132	Salmonella infection	22/379	80/7914	1.06132205457983e-11	5.25171430455881e-11	1.92617432773109e-11	NOS2/IL1A/CD14/MAPK1/CXCL2/MAPK8/NFKB1/IL1B/LBP/CXCL8/MAPK14/IL6/FOS/IFNG/MAPK3/CXCL1/RELA/ACTB/TLR4/CCL3/JUN/CSF2	22	Human Diseases	Infectious disease: bacterial
hsa05214	Glioma	21/379	75/7914	2.16739067538704e-11	1.05430698955268e-10	3.86688791326857e-11	IGF1/PDGFRB/EGF/CCND1/MAPK1/MDM2/EGFR/PDGFA/TP53/CDKN1A/PTEN/KRAS/MTOR/RAF1/PDGFB/PIK3CA/MAPK3/AKT1/CDKN2A/BAX/PRKCA	21	Human Diseases	Cancer: specific types
hsa04658	Th1 and Th2 cell differentiation	23/379	92/7914	3.06582863120864e-11	1.44244724124079e-10	5.29047218500197e-11	IL5/JAK2/NOTCH2/IL13/STAT1/MAPK1/IKBKB/IL4/MAPK8/NFKB1/NFKBIA/IL12RB1/STAT4/MAPK14/CHUK/IL2/FOS/IFNG/MAPK3/RELA/JAK1/JUN/NOTCH1	23	Organismal Systems	Immune system
hsa05222	Small cell lung cancer	23/379	92/7914	3.06582863120864e-11	1.44244724124079e-10	5.29047218500197e-11	NOS2/PTK2/BCL2/RARB/FN1/ITGB1/XIAP/PTGS2/CCND1/MYC/IKBKB/TP53/CDKN1A/NFKB1/NFKBIA/PTEN/RXRA/CHUK/CASP3/PIK3CA/RELA/AKT1/BAX	23	Human Diseases	Cancer: specific types
hsa05211	Renal cell carcinoma	20/379	69/7914	3.26831947797078e-11	1.51291562931873e-10	5.54892950419487e-11	EP300/MET/CREBBP/VEGFA/TGFB1/FH/MAPK1/CDKN1A/HGF/TGFB2/PTPN11/KRAS/RAF1/PDGFB/TGFB3/PIK3CA/MAPK3/HIF1A/AKT1/JUN	20	Human Diseases	Cancer: specific types
hsa04917	Prolactin signaling pathway	20/379	70/7914	4.37740404397996e-11	1.96299212597226e-10	7.19967770391441e-11	GCK/JAK2/CCND1/ESR1/STAT1/INS/MAPK1/MAPK8/SRC/NFKB1/IRF1/KRAS/MAPK14/RAF1/STAT3/PIK3CA/FOS/MAPK3/RELA/AKT1	20	Organismal Systems	Endocrine system
hsa05120	Epithelial cell signaling in Helicobacter pylori infection	20/379	70/7914	4.37740404397996e-11	1.96299212597226e-10	7.19967770391441e-11	MET/CXCR1/CXCL2/EGFR/IKBKB/MAPK8/SRC/CCL5/NFKB1/NFKBIA/PTPN11/CXCR2/CXCL8/MAPK14/CHUK/CASP3/LYN/CXCL1/RELA/JUN	20	Human Diseases	Infectious disease: bacterial
hsa04211	Longevity regulating pathway	22/379	89/7914	1.05895608538075e-10	4.67569840775807e-10	1.71490864029271e-10	IGF1/SOD2/PPARGC1A/FOXO1/INS/CREB1/TP53/CAT/NFKB1/SIRT1/TSC2/KRAS/PPARG/MTOR/ATG5/PRKAA2/PIK3CA/RELA/INSR/AKT1/BAX/ADIPOQ	22	Organismal Systems	Aging
hsa04919	Thyroid hormone signaling pathway	25/379	119/7914	2.43077211902313e-10	1.05701757296915e-09	3.87682953592206e-10	EP300/CREBBP/CTNNB1/CCND1/NOTCH2/ESR1/MYC/FOXO1/STAT1/MAPK1/MDM2/SRC/TP53/RXRA/TSC2/KRAS/MTOR/RAF1/PIK3CA/MAPK3/HIF1A/ACTB/AKT1/NOTCH1/PRKCA	25	Organismal Systems	Endocrine system
hsa04510	Focal adhesion	33/379	199/7914	2.49193459633692e-10	1.06744064052044e-09	3.91505828175479e-10	IGF1/MET/COL1A1/PTK2/BCL2/FN1/PDGFRB/EGF/ITGB1/SPP1/XIAP/CTNNB1/CCND1/VEGFA/MAPK1/EGFR/PDGFA/MAPK8/SRC/COL1A2/HGF/PTEN/RHOA/RAF1/PDGFB/VTN/PIK3CA/CAV1/MAPK3/ACTB/AKT1/JUN/PRKCA	33	Cellular Processes	Cellular community - eukaryotes
hsa04062	Chemokine signaling pathway	32/379	189/7914	2.72412046596134e-10	1.14973907901604e-09	4.21690474607019e-10	CXCR4/PTK2/JAK2/STAT1/CCR7/CCL11/CXCR1/MAPK1/CXCL2/IKBKB/SRC/CXCL10/CCL5/NFKB1/NFKBIA/CXCR2/KRAS/RHOA/CXCL8/RAF1/CHUK/STAT3/CCL2/LYN/PIK3CG/PIK3CA/CXCL12/MAPK3/CXCL1/RELA/AKT1/CCL3	32	Organismal Systems	Immune system
hsa04932	Non-alcoholic fatty liver disease (NAFLD)	28/379	149/7914	3.12653557650599e-10	1.30045755138727e-09	4.76969576888785e-10	LEP/TNF/IL1A/TNFRSF1A/TGFB1/INS/IKBKB/MAPK8/NFKB1/IL1B/SREBF1/RXRA/FAS/CASP8/CXCL8/CYP2E1/IL6/CASP3/PRKAA2/PPARA/PIK3CA/DDIT3/RELA/INSR/AKT1/JUN/BAX/ADIPOQ	28	Human Diseases	Endocrine and metabolic disease
hsa05206	MicroRNAs in cancer	42/379	310/7914	6.04789414704699e-10	2.47963660028927e-09	9.09457766473232e-10	EP300/MET/BRCA1/BCL2/EZR/PDGFRB/CREBBP/PTGS2/CCND1/NOTCH2/VEGFA/MYC/HMOX1/MAPK1/MDM2/EGFR/IKBKB/PDGFA/TP53/CDKN1A/NFKB1/SIRT1/ABCC1/TGFB2/PLAU/PTEN/EZH2/KRAS/RHOA/ABCB1/MTOR/RAF1/PDGFB/VIM/STAT3/CASP3/PIK3CA/MAPK3/CDKN2A/NOTCH1/PRKCA/MMP9	42	Human Diseases	Cancer: overview
hsa05213	Endometrial cancer	17/379	58/7914	8.34694204581582e-10	3.374045587534e-09	1.23750067395342e-09	EGF/CTNNB1/CCND1/MYC/MAPK1/EGFR/TP53/CDKN1A/PTEN/AXIN1/KRAS/RAF1/PIK3CA/CDH1/MAPK3/AKT1/BAX	17	Human Diseases	Cancer: specific types
hsa04210	Apoptosis	26/379	136/7914	9.32142706165191e-10	3.71562439818625e-09	1.36278173415964e-09	BIRC5/BCL2/TNF/TNFRSF1A/XIAP/MAPK1/IKBKB/MAPK8/TP53/NFKB1/NFKBIA/FAS/CASP8/KRAS/RAF1/CHUK/CASP3/PIK3CA/DDIT3/FOS/MAPK3/RELA/ACTB/AKT1/JUN/BAX	26	Cellular Processes	Cell growth and death
hsa05130	Pathogenic Escherichia coli infection	32/379	201/7914	1.37109339788798e-09	5.39046308484727e-09	1.9770632990454e-09	EZR/TNF/ITGB1/TNFRSF1A/F2/TUBB2B/MAPK1/IKBKB/MAPK8/CLDN1/NFKB1/IL1B/NFKBIA/NLRP3/PTPN11/FAS/CASP8/RHOA/CXCL8/MAPK14/CHUK/TUBB3/IL6/CASP3/LYN/FOS/MAPK3/RELA/ACTB/TLR4/JUN/BAX	32	Human Diseases	Infectious disease: bacterial
hsa05203	Viral carcinogenesis	31/379	201/7914	5.53143258628854e-09	2.14529885441191e-08	7.86832515830518e-09	EP300/C3/IRF3/CREBBP/CCND1/EIF2AK2/MAPK1/MDM2/CREB1/SRC/TP53/CDKN1A/NFKB1/NFKBIA/HLA-C/CASP8/KRAS/RHOA/GSN/HLA-A/STAT3/CASP3/LYN/PIK3CA/MAPK3/RELA/HLA-B/JAK1/CDKN2A/JUN/BAX	31	Human Diseases	Cancer: overview
hsa04072	Phospholipase D signaling pathway	26/379	148/7914	6.1559008216321e-09	2.35565804774455e-08	8.63986080229068e-09	GNAS/AGT/PDGFRB/EGF/F2/INS/CXCR1/MAPK1/EGFR/PDGFA/PTPN11/CXCR2/TSC2/KRAS/RHOA/CXCL8/MTOR/RAF1/PDGFB/AGTR1/PIK3CG/PIK3CA/MAPK3/INSR/AKT1/PRKCA	26	Environmental Information Processing	Signal transduction
hsa04061	Viral protein interaction with cytokine and cytokine receptor	21/379	100/7914	6.95074199795906e-09	2.62481967554507e-08	9.62706647916767e-09	CXCR4/TNF/TNFRSF1A/CCR7/CCL11/CXCR1/IL10/CXCL2/CXCL10/CCL5/CSF1/CXCR2/CXCL8/CCL2/IL6/IL2/CXCL12/TNFRSF1B/CXCL1/LTA/CCL3	21	Environmental Information Processing	Signaling molecules and interaction
hsa05143	African trypanosomiasis	13/379	37/7914	7.09915289312858e-09	2.64604789652974e-08	9.70492534945807e-09	TNF/IL10/HBB/IL1B/FAS/SELE/IL6/IFNG/ICAM1/VCAM1/TLR9/APOA1/PRKCA	13	Human Diseases	Infectious disease: parasitic
hsa05223	Non-small cell lung cancer	17/379	66/7914	7.46514218304894e-09	2.74678949555775e-08	1.00744159015505e-08	RARB/EGF/CCND1/MAPK1/EGFR/TP53/CDKN1A/RXRA/KRAS/RAF1/STAT3/PIK3CA/MAPK3/AKT1/CDKN2A/BAX/PRKCA	17	Human Diseases	Cancer: specific types
hsa04152	AMPK signaling pathway	23/379	120/7914	8.48353576598526e-09	3.08199337321237e-08	1.1303845124564e-08	IGF1/LEP/PPARGC1A/CCND1/FOXO1/HMGCR/INS/CREB1/SIRT1/CPT1A/SREBF1/FASN/CD36/TSC2/PPARG/MTOR/PRKAA2/PIK3CA/HNF4A/CFTR/INSR/AKT1/ADIPOQ	23	Environmental Information Processing	Signal transduction
hsa05221	Acute myeloid leukemia	17/379	67/7914	9.57102166951492e-09	3.43360402393848e-08	1.25934495651512e-08	CCND1/MYC/CD14/MAPK1/IKBKB/NFKB1/KRAS/MTOR/RAF1/MPO/CHUK/STAT3/PIK3CA/MAPK3/RELA/AKT1/CSF2	17	Human Diseases	Cancer: specific types
hsa04217	Necroptosis	27/379	162/7914	1.01860661569267e-08	3.60913702103451e-08	1.32372529654667e-08	BCL2/TNF/IL1A/JAK2/TNFRSF1A/XIAP/TNFAIP3/STAT1/EIF2AK2/MAPK8/IL1B/HMGB1/NLRP3/IFNA2/FAS/STAT4/CASP8/STAT3/HSP90AA1/RBCK1/PYGL/IFNG/GLUL/TLR4/JAK1/IFNB1/BAX	27	Cellular Processes	Cell growth and death
hsa04350	TGF-beta signaling pathway	20/379	94/7914	1.26216211208474e-08	4.4175673922966e-08	1.6202337767455e-08	EP300/BMP6/TNF/CREBBP/BMP7/TGFB1/MYC/SMAD2/MAPK1/HAMP/TGFB2/SMAD3/RHOA/SMAD7/SMAD4/TGFB3/SP1/IFNG/MAPK3/TGFBR2	20	Environmental Information Processing	Signal transduction
hsa05202	Transcriptional misregulation in cancer	29/379	186/7914	1.36572703011857e-08	4.72245370655456e-08	1.7320571085841e-08	IGF1/MET/ELANE/PTK2/MYC/FOXO1/CD14/MMP3/PLAT/MDM2/PDGFA/TP53/CDKN1A/NFKB1/IGFBP3/PLAU/RXRA/PPARG/CXCL8/MPO/IL6/SP1/DDIT3/RELA/TGFBR2/CEBPB/BAX/CSF2/MMP9	29	Human Diseases	Cancer: overview
hsa05230	Central carbon metabolism in cancer	17/379	69/7914	1.55016200234228e-08	5.29638684133611e-08	1.94255890017829e-08	FGFR1/MET/GCK/PDGFRB/MYC/MAPK1/EGFR/TP53/IDH1/PTEN/KRAS/MTOR/RAF1/PIK3CA/MAPK3/HIF1A/AKT1	17	Human Diseases	Cancer: overview
hsa04520	Adherens junction	17/379	71/7914	2.46435287938871e-08	8.32081501628895e-08	3.05183019119345e-08	EP300/FGFR1/MET/SNAI1/CREBBP/CTNNB1/MAPK1/EGFR/SRC/SMAD3/RHOA/SMAD4/CDH1/MAPK3/ACTB/INSR/TGFBR2	17	Cellular Processes	Cellular community - eukaryotes
hsa05231	Choline metabolism in cancer	20/379	98/7914	2.67752489025753e-08	8.93546097097572e-08	3.27726424756124e-08	PDGFRB/EGF/SLC22A5/MAPK1/EGFR/PDGFA/MAPK8/TSC2/KRAS/MTOR/RAF1/PDGFB/SP1/PIK3CA/FOS/MAPK3/HIF1A/AKT1/JUN/PRKCA	20	Human Diseases	Cancer: overview
hsa04976	Bile secretion	17/379	72/7914	3.08669737586696e-08	1.01825534123427e-07	3.73466107182935e-08	GNAS/LDLR/ABCC2/SLCO1B1/HMGCR/SLC10A1/SCT/ABCB11/SLCO1B3/RXRA/ABCB1/SCARB1/EPHX1/ABCB4/CFTR/NR1H4/CYP3A4	17	Organismal Systems	Digestive system
hsa04940	Type I diabetes mellitus	13/379	43/7914	5.60402280080701e-08	1.82767561799047e-07	6.70337655598925e-08	HSPD1/TNF/IL1A/INS/IL1B/HLA-C/FAS/HLA-A/CD80/IL2/IFNG/HLA-B/LTA	13	Human Diseases	Endocrine and metabolic disease
hsa04015	Rap1 signaling pathway	30/379	210/7914	5.93857627424323e-08	1.91502403450315e-07	7.02374485422026e-08	IGF1/FGFR1/MET/GNAS/PDGFRB/EGF/ITGB1/CTNNB1/VEGFA/INS/MAPK1/EGFR/PDGFA/SRC/HGF/CSF1/KRAS/RHOA/MAPK14/RAF1/PDGFB/FGF7/PIK3CA/CDH1/FGF2/MAPK3/ACTB/INSR/AKT1/PRKCA	30	Environmental Information Processing	Signal transduction
hsa05216	Thyroid cancer	12/379	37/7914	7.64003882426942e-08	2.43632349173925e-07	8.93571792312214e-08	CTNNB1/CCND1/MYC/MAPK1/TP53/CDKN1A/RXRA/KRAS/PPARG/CDH1/MAPK3/BAX	12	Human Diseases	Cancer: specific types
hsa04664	Fc epsilon RI signaling pathway	16/379	68/7914	8.33573390913076e-08	2.6289622328797e-07	9.64226016093784e-08	IL5/TNF/IL13/MAPK1/IL4/MAPK8/ALOX5/KRAS/MAPK14/RAF1/LYN/PIK3CA/MAPK3/AKT1/PRKCA/CSF2	16	Organismal Systems	Immune system
hsa01523	Antifolate resistance	11/379	31/7914	9.36892889388309e-08	2.92269847015701e-07	1.07195982767541e-07	TNF/ABCC2/TYMS/IKBKB/NFKB1/ABCC1/IL1B/MTHFR/CHUK/IL6/RELA	11	Human Diseases	Drug resistance: antineoplastic
hsa05330	Allograft rejection	12/379	38/7914	1.06895341073735e-07	3.29881321378085e-07	1.20990765222111e-07	IL5/TNF/IL10/IL4/HLA-C/FAS/HLA-A/CD80/IL2/IFNG/HLA-B/CD40LG	12	Human Diseases	Immune disease
hsa04213	Longevity regulating pathway - multiple species	15/379	62/7914	1.43340443015575e-07	4.37645820696489e-07	1.60515613679255e-07	IGF1/SOD2/HSPA8/FOXO1/INS/SOD1/CAT/SIRT1/KRAS/MTOR/ATG5/PRKAA2/PIK3CA/INSR/AKT1	15	Organismal Systems	Aging
hsa00220	Arginine biosynthesis	9/379	21/7914	2.12313883305681e-07	6.41411415881374e-07	2.35250840227902e-07	NOS2/ASS1/GPT/ASL/NOS1/ARG1/GLUL/NOS3/GPT2	9	Metabolism	Amino acid metabolism
hsa05204	Chemical carcinogenesis	17/379	82/7914	2.37224784500256e-07	7.09203261995558e-07	2.60114895285369e-07	UGT1A1/CYP2C19/CYP1A1/GSTP1/CYP3A5/PTGS2/CYP2C9/GSTM1/NAT2/CYP2E1/UGT1A6/UGT1A9/CYP1A2/EPHX1/GSTM3/GSTT1/CYP3A4	17	Human Diseases	Cancer: overview
hsa05131	Shigellosis	15/379	67/7914	4.27504702896493e-07	1.26456077536779e-06	4.6380369534854e-07	ITGB1/MAPK1/IKBKB/MAPK8/SRC/NFKB1/NFKBIA/NOD2/CXCL8/MAPK14/ATG5/CHUK/MAPK3/RELA/ACTB	15	Human Diseases	Infectious disease: bacterial
hsa00980	Metabolism of xenobiotics by cytochrome P450	16/379	76/7914	4.31801240369491e-07	1.26456077536779e-06	4.6380369534854e-07	UGT1A1/CYP2D6/CYP1A1/GSTP1/CYP3A5/CYP2C9/GSTM1/CYP2E1/UGT1A6/UGT1A9/CYP1A2/EPHX1/GSTM3/CYP2B6/GSTT1/CYP3A4	16	Metabolism	Xenobiotics biodegradation and metabolism
hsa04371	Apelin signaling pathway	22/379	137/7914	4.78080858064596e-07	1.38595157842969e-06	5.08326271201058e-07	NOS2/PPARGC1A/SPP1/CCND1/SMAD2/MAPK1/PLAT/NOS1/SMAD3/KRAS/MTOR/RAF1/AGTR1/SMAD4/PRKAA2/PIK3CG/CDH1/MAPK3/NOS3/SERPINE1/AKT1/ACTA2	22	Environmental Information Processing	Signal transduction
hsa04370	VEGF signaling pathway	14/379	59/7914	4.86563520498397e-07	1.3964373038304e-06	5.12172126840418e-07	HSPB1/PTK2/PTGS2/VEGFA/MAPK1/SRC/KRAS/MAPK14/RAF1/PIK3CA/MAPK3/NOS3/AKT1/PRKCA	14	Environmental Information Processing	Signal transduction
hsa04014	Ras signaling pathway	30/379	232/7914	5.52547838942456e-07	1.57011118590579e-06	5.75870598168271e-07	IGF1/FGFR1/MET/PDGFRB/EGF/VEGFA/INS/MAPK1/EGFR/IKBKB/PDGFA/MAPK8/NFKB1/HGF/PTPN11/CSF1/KRAS/RHOA/RAF1/PDGFB/CHUK/IGF2/FGF7/PIK3CA/FGF2/MAPK3/RELA/INSR/AKT1/PRKCA	30	Environmental Information Processing	Signal transduction
hsa04960	Aldosterone-regulated sodium reabsorption	11/379	37/7914	7.29141538922339e-07	2.05160413402658e-06	7.52468048423467e-07	IGF1/SCNN1B/INS/MAPK1/SCNN1G/KRAS/PIK3CA/MAPK3/INSR/SCNN1A/PRKCA	11	Organismal Systems	Excretory system
hsa00983	Drug metabolism - other enzymes	16/379	79/7914	7.53444271801445e-07	2.09304211125768e-06	7.67666279573696e-07	XDH/UGT1A1/GSTP1/TPMT/GSTM1/NAT2/NME1/TYMP/MPO/CYP2E1/UGT1A6/UGT1A9/ITPA/GSTM3/GSTT1/CYP3A4	16	Metabolism	Xenobiotics biodegradation and metabolism
hsa04071	Sphingolipid signaling pathway	20/379	119/7914	7.58454284218812e-07	2.09304211125768e-06	7.67666279573696e-07	BCL2/TNF/TNFRSF1A/MAPK1/MAPK8/TP53/NFKB1/ABCC1/PTEN/KRAS/RHOA/MAPK14/RAF1/PIK3CA/MAPK3/RELA/NOS3/AKT1/BAX/PRKCA	20	Environmental Information Processing	Signal transduction
hsa04622	RIG-I-like receptor signaling pathway	15/379	70/7914	7.81792496497776e-07	2.13689949042725e-06	7.83751876188247e-07	IRF3/TNF/IKBKB/MAPK8/CXCL10/NFKB1/NFKBIA/IFNA2/CASP8/CXCL8/MAPK14/ATG5/CHUK/RELA/IFNB1	15	Organismal Systems	Immune system
hsa00982	Drug metabolism - cytochrome P450	15/379	72/7914	1.14669761114498e-06	3.07572162989354e-06	1.12808422149039e-06	UGT1A1/CYP2D6/CYP2C19/GSTP1/CYP3A5/CYP2C9/GSTM1/CYP2E1/UGT1A6/UGT1A9/CYP1A2/GSTM3/CYP2B6/GSTT1/CYP3A4	15	Metabolism	Xenobiotics biodegradation and metabolism
hsa04115	p53 signaling pathway	15/379	72/7914	1.14669761114498e-06	3.07572162989354e-06	1.12808422149039e-06	IGF1/BCL2/CCND1/MDM2/TP53/CDKN1A/IGFBP3/PTEN/FAS/CASP8/TSC2/CASP3/SERPINE1/CDKN2A/BAX	15	Cellular Processes	Cell growth and death
hsa04012	ErbB signaling pathway	16/379	85/7914	2.11072753623889e-06	5.60906298982001e-06	2.05723931407299e-06	PTK2/EGF/MYC/MAPK1/EGFR/MAPK8/SRC/CDKN1A/KRAS/MTOR/RAF1/PIK3CA/MAPK3/AKT1/JUN/PRKCA	16	Environmental Information Processing	Signal transduction
hsa04915	Estrogen signaling pathway	21/379	138/7914	2.15800646691556e-06	5.68209042206207e-06	2.08402362811739e-06	MMP2/GNAS/BCL2/HSPA8/ESR1/MAPK1/EGFR/CREB1/SRC/KRAS/RAF1/HSP90AA1/SP1/PIK3CA/FOS/MAPK3/HSP90B1/NOS3/AKT1/JUN/MMP9	21	Organismal Systems	Endocrine system
hsa05332	Graft-versus-host disease	11/379	41/7914	2.26547735761032e-06	5.91083637849237e-06	2.16792091637351e-06	TNF/IL1A/IL1B/HLA-C/FAS/HLA-A/IL6/CD80/IL2/IFNG/HLA-B	11	Human Diseases	Immune disease
hsa04722	Neurotrophin signaling pathway	19/379	119/7914	3.19009269744261e-06	8.24825769518945e-06	3.02521830008782e-06	BCL2/MAPK1/IKBKB/MAPK8/TP53/NFKB1/NFKBIA/PTPN11/KRAS/RHOA/MAPK14/RAF1/PIK3CA/MAPK3/SH2B3/RELA/AKT1/JUN/BAX	19	Organismal Systems	Nervous system
hsa05020	Prion diseases	10/379	35/7914	3.52729571062167e-06	9.03869525846804e-06	3.31512754757676e-06	IL1A/MAPK1/SOD1/CCL5/IL1B/IL6/HSPA5/MAPK3/NOTCH1/BAX	10	Human Diseases	Neurodegenerative disease
hsa04670	Leukocyte transendothelial migration	18/379	112/7914	5.27276156598957e-06	1.33918811454779e-05	4.91174808196514e-06	MMP2/CXCR4/PTK2/EZR/ITGB1/CTNNB1/CLDN1/PTPN11/RHOA/MAPK14/PECAM1/PIK3CA/CXCL12/ICAM1/ACTB/VCAM1/PRKCA/MMP9	18	Organismal Systems	Immune system
hsa04662	B cell receptor signaling pathway	15/379	82/7914	6.37628530340538e-06	1.60525779129592e-05	5.88761339187939e-06	MAPK1/IKBKB/NFKB1/NFKBIA/KRAS/RAF1/CHUK/LYN/PIK3CA/FOS/MAPK3/CD81/RELA/AKT1/JUN	15	Organismal Systems	Immune system
hsa04930	Type II diabetes mellitus	11/379	46/7914	7.7039305816411e-06	1.92263311037478e-05	7.05165270630764e-06	GCK/TNF/INS/MAPK1/IKBKB/MAPK8/MTOR/PIK3CA/MAPK3/INSR/ADIPOQ	11	Human Diseases	Endocrine and metabolic disease
hsa04928	Parathyroid hormone synthesis, secretion and action	17/379	106/7914	9.92129106000087e-06	2.45466425363815e-05	9.002986442832e-06	FGFR1/GNAS/BCL2/BGLAP/MAPK1/MMP14/EGFR/CREB1/CDKN1A/RXRA/RHOA/RAF1/VDR/SP1/FOS/MAPK3/PRKCA	17	Organismal Systems	Endocrine system
hsa04550	Signaling pathways regulating pluripotency of stem cells	20/379	140/7914	1.00953479512494e-05	2.47638022393895e-05	9.0826342341425e-06	IGF1/FGFR1/JAK2/WNT5A/CTNNB1/MYC/SMAD2/MAPK1/AXIN1/SMAD3/KRAS/MAPK14/RAF1/STAT3/SMAD4/PIK3CA/FGF2/MAPK3/JAK1/AKT1	20	Cellular Processes	Cellular community - eukaryotes
hsa04640	Hematopoietic cell lineage	16/379	98/7914	1.43545999939554e-05	3.49133067649593e-05	1.28051739464366e-05	IL5/TNF/IL1A/THPO/CR1/CD14/IL4/IL1B/EPO/CSF1/CD36/CSF3/TFRC/IL6/CD34/CSF2	16	Organismal Systems	Immune system
hsa04979	Cholesterol metabolism	11/379	50/7914	1.81445877416747e-05	4.37604763181565e-05	1.60500554990488e-05	APOE/LDLR/PCSK9/APOH/CETP/LPL/ABCB11/APOC3/CD36/SCARB1/APOA1	11	Organismal Systems	Digestive system
hsa05014	Amyotrophic lateral sclerosis (ALS)	11/379	51/7914	2.2155998061796e-05	5.29897620311287e-05	1.94350860191193e-05	BCL2/TNF/TNFRSF1A/SOD1/TP53/CAT/NOS1/MAPK14/CASP3/TNFRSF1B/BAX	11	Human Diseases	Neurodegenerative disease
hsa04910	Insulin signaling pathway	19/379	137/7914	2.58135765629938e-05	6.12272435832992e-05	2.2456351946928e-05	GCK/PPARGC1A/FOXO1/INS/MAPK1/IKBKB/MAPK8/SREBF1/FASN/TSC2/KRAS/MTOR/RAF1/PRKAA2/PYGL/PIK3CA/MAPK3/INSR/AKT1	19	Organismal Systems	Endocrine system
hsa04810	Regulation of actin cytoskeleton	25/379	213/7914	2.75203419380014e-05	6.4740476526282e-05	2.37449024486639e-05	CXCR4/FGFR1/PTK2/EZR/FN1/PDGFRB/EGF/ITGB1/F2/INS/MAPK1/EGFR/PDGFA/SRC/KRAS/RHOA/RAF1/GSN/PDGFB/FGF7/PIK3CA/FGF2/CXCL12/MAPK3/ACTB	25	Cellular Processes	Cell motility
hsa05320	Autoimmune thyroid disease	11/379	53/7914	3.25253540847198e-05	7.58924928643462e-05	2.7835134004895e-05	IL5/IL10/IL4/HLA-C/IFNA2/FAS/HLA-A/CD80/IL2/HLA-B/CD40LG	11	Human Diseases	Immune disease
hsa04145	Phagosome	20/379	152/7914	3.46197726640908e-05	8.01280222144683e-05	2.93886015824201e-05	C3/ITGB1/SFTPD/MRC1/CD14/TUBB2B/HLA-C/TLR2/NOS1/CD36/MPO/CALR/HLA-A/TUBB3/SCARB1/TFRC/ACTB/TLR4/HLA-B/CANX	20	Cellular Processes	Transport and catabolism
hsa04623	Cytosolic DNA-sensing pathway	12/379	63/7914	3.55056807023874e-05	8.15210428926815e-05	2.98995205914842e-05	IRF3/IKBKB/CXCL10/CCL5/NFKB1/IL1B/NFKBIA/IFNA2/CHUK/IL6/RELA/IFNB1	12	Organismal Systems	Immune system
hsa04150	mTOR signaling pathway	20/379	153/7914	3.8105188120653e-05	8.67951507192653e-05	3.18339082043885e-05	IGF1/TNF/TNFRSF1A/WNT5A/INS/MAPK1/IKBKB/PTEN/TSC2/KRAS/RHOA/MTOR/RAF1/CHUK/PRKAA2/PIK3CA/MAPK3/INSR/AKT1/PRKCA	20	Environmental Information Processing	Signal transduction
hsa04390	Hippo signaling pathway	20/379	154/7914	4.19007194676383e-05	9.46890274583636e-05	3.47291499938983e-05	BIRC5/BMP6/WNT5A/BMP7/CTNNB1/CCND1/TGFB1/MYC/SMAD2/TGFB2/AXIN1/SMAD3/AFP/SMAD7/SMAD4/TGFB3/CDH1/ACTB/SERPINE1/TGFBR2	20	Environmental Information Processing	Signal transduction
hsa04650	Natural killer cell mediated cytotoxicity	18/379	131/7914	4.77127112086459e-05	0.000106980844663136	3.92374269807943e-05	TNF/MAPK1/HLA-C/PTPN11/IFNA2/FAS/KRAS/RAF1/HLA-A/CASP3/PIK3CA/IFNG/ICAM1/MAPK3/HLA-B/IFNB1/PRKCA/CSF2	18	Organismal Systems	Immune system
hsa03320	PPAR signaling pathway	13/379	76/7914	5.53928586983568e-05	0.000123238375553709	4.52002110961704e-05	MMP1/ACADM/LPL/CPT1A/RXRA/APOC3/CD36/PPARG/CPT2/PPARA/FABP1/APOA1/ADIPOQ	13	Organismal Systems	Endocrine system
hsa04540	Gap junction	14/379	88/7914	6.61523733660033e-05	0.000146044085815715	5.35646747902861e-05	GNAS/PDGFRB/EGF/TUBB2B/MAPK1/EGFR/PDGFA/SRC/KRAS/RAF1/PDGFB/TUBB3/MAPK3/PRKCA	14	Cellular Processes	Cellular community - eukaryotes
hsa04612	Antigen processing and presentation	13/379	78/7914	7.33086345109663e-05	0.00016060746644769	5.89060944242397e-05	HSPA8/TNF/B2M/CREB1/HLA-C/HSPA4/CALR/HLA-A/HSP90AA1/IFNG/HSPA5/HLA-B/CANX	13	Organismal Systems	Immune system
hsa05310	Asthma	8/379	31/7914	7.67004637704709e-05	0.000166765402288827	6.11646441550805e-05	IL5/TNF/IL13/CCL11/IL10/IL4/RNASE3/CD40LG	8	Human Diseases	Immune disease
hsa04611	Platelet activation	17/379	124/7914	7.9480460800175e-05	0.000171510468042483	6.2904994697408e-05	COL1A1/GNAS/ITGB1/F2/MAPK1/SRC/COL1A2/RHOA/MAPK14/COL3A1/LYN/PIK3CG/PIK3CA/MAPK3/NOS3/ACTB/AKT1	17	Organismal Systems	Immune system
hsa04672	Intestinal immune network for IgA production	10/379	49/7914	8.65364159420751e-05	0.000183970010187967	6.7474788258928e-05	CXCR4/IL5/TGFB1/IL10/IL4/IL6/CD80/IL2/CXCL12/CD40LG	10	Organismal Systems	Immune system
hsa04913	Ovarian steroidogenesis	10/379	49/7914	8.65364159420751e-05	0.000183970010187967	6.7474788258928e-05	IGF1/GNAS/CYP1A1/BMP6/LDLR/PTGS2/INS/ALOX5/SCARB1/INSR	10	Organismal Systems	Endocrine system
hsa04216	Ferroptosis	9/379	40/7914	8.77495566443642e-05	0.000185177373212739	6.79176135018299e-05	TF/GCLC/HMOX1/TP53/SLC40A1/ATG5/TFRC/SLC11A2/CP	9	Cellular Processes	Cell growth and death
hsa04215	Apoptosis - multiple species	8/379	32/7914	9.80483942675512e-05	0.00020540065076487	7.53349168402238e-05	BIRC5/BCL2/TNFRSF1A/XIAP/MAPK8/CASP8/CASP3/BAX	8	Cellular Processes	Cell growth and death
hsa05416	Viral myocarditis	11/379	60/7914	0.000108123953232911	0.000224866482448156	8.24744113141962e-05	CCND1/HLA-C/CASP8/HLA-A/CASP3/CD80/ICAM1/CAV1/ACTB/HLA-B/CD40LG	11	Human Diseases	Cardiovascular disease
hsa00860	Porphyrin and chlorophyll metabolism	9/379	42/7914	0.000131428844066867	0.000271367469404251	9.95296055031179e-05	UGT1A1/ALAD/HMOX1/FECH/CPOX/ALAS2/UGT1A6/UGT1A9/CP	9	Metabolism	Metabolism of cofactors and vitamins
hsa02010	ABC transporters	9/379	45/7914	0.000229960564413622	0.000471419157047925	0.000172902680010242	ABCA3/ABCB7/ABCC2/ABCD3/ABCB11/ABCC1/ABCB1/ABCB4/CFTR	9	Environmental Information Processing	Membrane transport
hsa05410	Hypertrophic cardiomyopathy (HCM)	13/379	90/7914	0.000324430761891406	0.000660366160729315	0.00024220288308429	EDN1/IGF1/ACTC1/AGT/TNF/ITGB1/TGFB1/TGFB2/IL6/ACE/PRKAA2/TGFB3/ACTB	13	Human Diseases	Cardiovascular disease
hsa04610	Complement and coagulation cascades	12/379	79/7914	0.000340894670786774	0.000688991341660592	0.000252701757440158	C3/F2/CR1/PLAT/PLG/PLAU/SERPINA1/THBD/VTN/SERPINE1/SERPINC1/F3	12	Organismal Systems	Immune system
hsa04921	Oxytocin signaling pathway	18/379	153/7914	0.000356027698193065	0.000714545100569298	0.00026207412454403	GNAS/PTGS2/CCND1/MAPK1/EGFR/SRC/CDKN1A/KRAS/RHOA/RAF1/PRKAA2/PIK3CG/FOS/MAPK3/NOS3/ACTB/JUN/PRKCA	18	Organismal Systems	Endocrine system
hsa04934	Cushing syndrome	18/379	155/7914	0.000417756106061245	0.000832611128052621	0.000305377270512606	GNAS/AGT/LDLR/WNT5A/CTNNB1/CCND1/FH/MAPK1/EGFR/CREB1/CDKN1A/AXIN1/AGTR1/SCARB1/AIP/SP1/MAPK3/CDKN2A	18	Human Diseases	Endocrine and metabolic disease
hsa04912	GnRH signaling pathway	13/379	93/7914	0.000449918949575859	0.000890529231229459	0.000326619927096812	MMP2/GNAS/MAPK1/MMP14/EGFR/MAPK8/SRC/KRAS/MAPK14/RAF1/MAPK3/JUN/PRKCA	13	Organismal Systems	Endocrine system
hsa04614	Renin-angiotensin system	6/379	23/7914	0.000584004959661977	0.00114800974947252	0.000421056207398686	AGT/ACE2/REN/AGTR2/AGTR1/ACE	6	Organismal Systems	Endocrine system
hsa05168	Herpes simplex virus 1 infection	40/379	491/7914	0.000599974978879415	0.00117137972066933	0.000429627625405954	C3/BCL2/IRF3/TNF/JAK2/TNFRSF1A/B2M/STAT1/EIF2AK2/IKBKB/SRC/CCL5/TP53/NFKB1/IL1B/NFKBIA/HLA-C/TLR2/PTPN11/IFNA2/FAS/CASP8/TSC2/MTOR/CALR/HLA-A/CHUK/CCL2/IL6/CASP3/PIK3CA/IFNG/RELA/TLR9/HLA-B/JAK1/AKT1/LTA/IFNB1/BAX	40	Human Diseases	Infectious disease: viral
hsa05100	Bacterial invasion of epithelial cells	11/379	73/7914	0.000642024417960034	0.00124500681050358	0.00045663187621624	MET/PTK2/FN1/ITGB1/CTNNB1/SRC/RHOA/PIK3CA/CDH1/CAV1/ACTB	11	Human Diseases	Infectious disease: bacterial
hsa01230	Biosynthesis of amino acids	11/379	75/7914	0.000811110138048929	0.00154527059697537	0.000566759800834537	ASS1/CBS/GPT/ASL/IDH1/ARG1/GLUL/MAT1A/GPT2/ALDOB/PAH	11	Metabolism	Global and overview maps
hsa04140	Autophagy - animal	16/379	137/7914	0.000811615046713357	0.00154527059697537	0.000566759800834537	BCL2/INS/MAPK1/MAPK8/HMGB1/PTEN/TSC2/KRAS/MTOR/RAF1/ATG5/PRKAA2/PIK3CA/MAPK3/HIF1A/AKT1	16	Cellular Processes	Transport and catabolism
hsa04110	Cell cycle	15/379	124/7914	0.000813016934297144	0.00154527059697537	0.000566759800834537	EP300/CREBBP/CCND1/TGFB1/MYC/SMAD2/MDM2/TP53/CDKN1A/TGFB2/SMAD3/PCNA/SMAD4/TGFB3/CDKN2A	15	Cellular Processes	Cell growth and death
hsa00232	Caffeine metabolism	3/379	5/7914	0.00101381633684009	0.0019142453202178	0.00070208887592804	XDH/NAT2/CYP1A2	3	Metabolism	Biosynthesis of other secondary metabolites
hsa04024	cAMP signaling pathway	21/379	216/7914	0.0015282497214567	0.00286671679776517	0.00105142739694303	EDN1/EP300/GNAS/EDNRA/CREBBP/MAPK1/CREB1/MAPK8/NFKB1/NFKBIA/RHOA/RAF1/ADRB2/PPARA/PIK3CA/FOS/MAPK3/RELA/CFTR/AKT1/JUN	21	Environmental Information Processing	Signal transduction
hsa04922	Glucagon signaling pathway	13/379	106/7914	0.00157182019049123	0.0029293012640973	0.00107438153827152	EP300/GNAS/GCK/PPARGC1A/CREBBP/FOXO1/CREB1/SIRT1/CPT1A/PRKAA2/PPARA/PYGL/AKT1	13	Organismal Systems	Endocrine system
hsa04514	Cell adhesion molecules (CAMs)	16/379	147/7914	0.00172707898409566	0.00319788173184164	0.00117288895354544	ITGB1/PTPRC/CLDN1/HLA-C/CDH2/SELE/HLA-A/CD34/PECAM1/CD80/CDH1/ICAM1/VCAM1/HLA-B/CD274/CD40LG	16	Environmental Information Processing	Signaling molecules and interaction
hsa00140	Steroid hormone biosynthesis	9/379	60/7914	0.0020347776046797	0.00371962530282212	0.00136424914829346	UGT1A1/CYP1A1/CYP3A5/AKR1D1/CYP2E1/UGT1A6/UGT1A9/CYP1A2/CYP3A4	9	Metabolism	Lipid metabolism
hsa04730	Long-term depression	9/379	60/7914	0.0020347776046797	0.00371962530282212	0.00136424914829346	IGF1/GNAS/MAPK1/NOS1/KRAS/RAF1/LYN/MAPK3/PRKCA	9	Organismal Systems	Nervous system
hsa04360	Axon guidance	18/379	181/7914	0.00253754957044225	0.00460934637162611	0.00169057266518471	CXCR4/SEMA4D/MET/PTK2/ITGB1/SHH/WNT5A/BMP7/MAPK1/SRC/PTPN11/KRAS/RHOA/RAF1/PIK3CA/CXCL12/MAPK3/PRKCA	18	Organismal Systems	Development and regeneration
hsa04916	Melanogenesis	12/379	101/7914	0.00307868027308636	0.00555711470676595	0.00203818621190755	EDN1/EP300/GNAS/CREBBP/WNT5A/CTNNB1/MAPK1/CREB1/KRAS/RAF1/MAPK3/PRKCA	12	Organismal Systems	Endocrine system
hsa04929	GnRH secretion New!	9/379	64/7914	0.00320370190986694	0.00574664030082382	0.00210769862491246	SPP1/MAPK1/KRAS/RAF1/PIK3CA/MAPK3/AKT1/KCNN4/PRKCA	9	Organismal Systems	Endocrine system
hsa04137	Mitophagy - animal	9/379	65/7914	0.00356562067678921	0.00635610642384164	0.00233123287138883	MAPK8/SRC/TP53/KRAS/ATG5/SP1/RELA/HIF1A/JUN	9	Cellular Processes	Transport and catabolism
hsa00830	Retinol metabolism	9/379	67/7914	0.00438528374991655	0.00776899034707438	0.0028494371344487	UGT1A1/CYP1A1/CYP3A5/CYP2C9/UGT1A6/UGT1A9/CYP1A2/CYP2B6/CYP3A4	9	Metabolism	Metabolism of cofactors and vitamins
hsa04924	Renin secretion	9/379	69/7914	0.00534492222565826	0.00941099802922651	0.00345167725260463	EDN1/GNAS/EDNRA/AGT/CREB1/REN/AGTR1/ADRB2/ACE	9	Organismal Systems	Endocrine system
hsa00250	Alanine, aspartate and glutamate metabolism	6/379	36/7914	0.00666106344902366	0.0116568610357914	0.00427539374135023	ASS1/GPT/ASL/AGXT/GLUL/GPT2	6	Metabolism	Amino acid metabolism
hsa04914	Progesterone-mediated oocyte maturation	11/379	98/7914	0.00695382139274982	0.012095434786177	0.00443624969234438	IGF1/INS/MAPK1/MAPK8/KRAS/MAPK14/RAF1/HSP90AA1/PIK3CA/MAPK3/AKT1	11	Organismal Systems	Endocrine system
hsa04726	Serotonergic synapse	12/379	115/7914	0.00875189749597152	0.0151312926586977	0.0055497130602229	CYP2D6/CYP2C19/GNAS/PTGS2/CYP2C9/MAPK1/ALOX5/KRAS/RAF1/CASP3/MAPK3/PRKCA	12	Organismal Systems	Nervous system
hsa04310	Wnt signaling pathway	15/379	160/7914	0.00957913385673806	0.0164623438136756	0.00603790347099783	EP300/MMP7/CREBBP/WNT5A/CTNNB1/CCND1/MYC/MAPK8/TP53/AXIN1/SMAD3/RHOA/SMAD4/JUN/PRKCA	15	Environmental Information Processing	Signal transduction
hsa00591	Linoleic acid metabolism	5/379	29/7914	0.0112583666333126	0.0192330429985757	0.00705411443190014	CYP2C19/CYP2C9/CYP2E1/CYP1A2/CYP3A4	5	Metabolism	Lipid metabolism
hsa04261	Adrenergic signaling in cardiomyocytes	14/379	149/7914	0.0118775794797738	0.0201708006550005	0.00739805635613443	GNAS/BCL2/ACTC1/AGT/MAPK1/CREB1/AGTR2/MAPK14/AGTR1/ADRB2/PIK3CG/MAPK3/AKT1/PRKCA	14	Organismal Systems	Circulatory system
hsa04923	Regulation of lipolysis in adipocytes	7/379	55/7914	0.0152599161318809	0.0257623289991165	0.0094488644779448	GNAS/PTGS2/INS/ADRB2/PIK3CA/INSR/AKT1	7	Organismal Systems	Endocrine system
hsa05414	Dilated cardiomyopathy (DCM)	10/379	96/7914	0.0161825994461076	0.0271602692458063	0.009961587840017	IGF1/GNAS/ACTC1/AGT/TNF/ITGB1/TGFB1/TGFB2/TGFB3/ACTB	10	Human Diseases	Cardiovascular disease
hsa00480	Glutathione metabolism	7/379	56/7914	0.0167465284192833	0.0279433352112459	0.0102487934022541	GSTP1/GCLC/GGT1/GSTM1/IDH1/GSTM3/GSTT1	7	Metabolism	Metabolism of other amino acids
hsa00071	Fatty acid degradation	6/379	44/7914	0.0175290950262457	0.0290800593788007	0.0106657103901708	ALDH2/ACADM/HADHB/HADHA/CPT1A/CPT2	6	Metabolism	Lipid metabolism
hsa04725	Cholinergic synapse	11/379	112/7914	0.0180092518542772	0.0297049154148135	0.0108948892040394	BCL2/JAK2/MAPK1/CREB1/KRAS/PIK3CG/PIK3CA/FOS/MAPK3/AKT1/PRKCA	11	Organismal Systems	Nervous system
hsa04270	Vascular smooth muscle contraction	12/379	132/7914	0.0240530497722693	0.0394470016265217	0.0144679998630191	EDN1/GNAS/EDNRA/AGT/MAPK1/RHOA/CALCA/RAF1/AGTR1/MAPK3/ACTA2/PRKCA	12	Organismal Systems	Circulatory system
hsa04918	Thyroid hormone synthesis	8/379	74/7914	0.0245203878560094	0.0399849506515608	0.0146653037416324	GNAS/CREB1/ALB/TTR/HSPA5/HSP90B1/CANX/PRKCA	8	Organismal Systems	Endocrine system
hsa04141	Protein processing in endoplasmic reticulum	14/379	166/7914	0.0278135001375241	0.0450987262116917	0.0165408861953756	BCL2/HSPA8/NFE2L2/VCP/EIF2AK2/MAPK8/CALR/HSP90AA1/DDIT3/HSPA5/HSP90B1/ATF6/CANX/BAX	14	Genetic Information Processing	Folding, sorting and degradation
hsa00590	Arachidonic acid metabolism	7/379	63/7914	0.0301065315181194	0.0482713661770964	0.0177045172114786	CYP2C19/PTGS2/CYP2C9/GGT1/ALOX5/CYP2E1/CYP2B6	7	Metabolism	Lipid metabolism
hsa05217	Basal cell carcinoma	7/379	63/7914	0.0301065315181194	0.0482713661770964	0.0177045172114786	SHH/WNT5A/CTNNB1/TP53/CDKN1A/AXIN1/BAX	7	Human Diseases	Cancer: specific types
hsa04666	Fc gamma R-mediated phagocytosis	9/379	93/7914	0.0334439857342904	0.0532479459741613	0.0195297802949427	PTPRC/MAPK1/RAF1/GSN/LYN/PIK3CA/MAPK3/AKT1/PRKCA	9	Organismal Systems	Immune system
hsa04950	Maturity onset diabetes of the young	4/379	26/7914	0.033581457217154	0.0532479459741613	0.0195297802949427	GCK/INS/NR5A2/HNF4A	4	Human Diseases	Endocrine and metabolic disease
hsa04927	Cortisol synthesis and secretion	7/379	65/7914	0.0349542751687989	0.0551202031507983	0.0202164691548866	GNAS/AGT/LDLR/CREB1/AGTR1/SCARB1/SP1	7	Organismal Systems	Endocrine system
hsa00053	Ascorbate and aldarate metabolism	4/379	27/7914	0.0379823602386291	0.0595679638715112	0.0218477769563584	UGT1A1/ALDH2/UGT1A6/UGT1A9	4	Metabolism	Carbohydrate metabolism
hsa04720	Long-term potentiation	7/379	67/7914	0.0402935581987088	0.062849191320812	0.0230512346674535	EP300/CREBBP/MAPK1/KRAS/RAF1/MAPK3/PRKCA	7	Organismal Systems	Nervous system
hsa04146	Peroxisome	8/379	83/7914	0.0444572723831022	0.0688772111664447	0.0252621350326223	XDH/NOS2/SOD2/ABCD3/SOD1/CAT/IDH1/AGXT	8	Cellular Processes	Transport and catabolism
hsa04975	Fat digestion and absorption	5/379	41/7914	0.0446381926026436	0.0688772111664447	0.0252621350326223	CD36/MTTP/SCARB1/FABP1/APOA1	5	Organismal Systems	Digestive system
hsa00380	Tryptophan metabolism	5/379	42/7914	0.0487639356666967	0.0748409066114543	0.0274494430997449	ALDH2/CYP1A1/CAT/HADHA/CYP1A2	5	Metabolism	Amino acid metabolism
